# Supplementary material for: HMGB1 is a Central Driver of Dynamic Pro-inflammatory Networks in Pediatric Acute Liver Failure induced by Acetaminophen
Source: PubMed Central journal article supplement (PMC6461628; doi:10.1038/s41598-019-42564-5), 2019-04-12

***HMGB1 is a Central Driver of Dynamic Pro-inflammatory Networks in Pediatric Acute Liver Failure induced by Acetaminophen***

Ruben Zamora<sup>1,2</sup>, Derek Barclay<sup>1</sup>, Jinling Yin<sup>1</sup>, Estella M. Alonso<sup>3</sup>, Mike A. Leonis<sup>4</sup>, Qi Mi<sup>1</sup>,  
Timothy R. Billiar<sup>1,2</sup>, Richard L. Simmons<sup>1</sup>, Robert H. Squires<sup>5</sup>, Yoram Vodovotz<sup>1,2,\*</sup>

<sup>1</sup>Department of Surgery, University of Pittsburgh, Pittsburgh, PA 15213

<sup>2</sup>Center for Inflammation and Regenerative Modeling, McGowan Institute for Regenerative Medicine, Pittsburgh, PA 15219

<sup>3</sup>Ann & Robert H. Lurie Children's Hospital of Chicago, Chicago, IL 60611

<sup>4</sup>Department of Pediatrics, University of Alabama at Birmingham, Birmingham, AL 35233.

<sup>5</sup>Department of Pediatrics, University of Pittsburgh, Pittsburgh, PA 15213

## Supplementary Figures

**Fig. S1. Time-dependent release of inflammatory mediators in PALF patients.** Serum samples from PALF spontaneous survivors were assessed for inflammatory mediators and segregated into three sub-groups (APAPo+NAC [n=13 patients], non-APAPo+NAC [n=8 patients], and non-APAPo non-NAC [n=40 patients]) and non-survivors (n=12 patients). Box plots represent the 25<sup>th</sup> and 75<sup>th</sup> percentiles with a line at the median and error bars defining the 10<sup>th</sup> and 90<sup>th</sup> percentiles (significance level set at  $P < 0.05$ , analyzed by Two-Way ANOVA followed by Holm-Sidak *post hoc* test).

**Fig. S2. Explanation of DyNA output.** A representative DyNA output showing a network of inflammatory mediator connections over a specific time interval. The closed red circles (nodes) represent mediators with at least one connection to another mediator, while open yellow nodes represent mediators with no connections to other mediators. Black lines (edges) represent positive connections linking mediators that move in the same direction, while red edges represent negative connections that link mediators that move in opposite direction.

**Fig. S3. Time-dependent release of inflammatory mediators by HC from C57BL/6 and HC-HMGB1<sup>-/-</sup> mice.** Analysis of supernatant concentrations of inflammatory mediators released by freshly isolated primary HC from C57BL/6 and HC-HMGB1<sup>-/-</sup> mice. Cells were treated with 10 mM APAP alone (C57BL/6: n=3, HMGB1<sup>-/-</sup>: n=5 mice) or for 1h followed by 1 mM N-acetylcysteine (NAC) (C57BL/6: n=9, HMGB1<sup>-/-</sup>: n=6 mice) administered at 1-24h following APAP (APAP+NAC) (C57BL/6: n=3, HMGB1<sup>-/-</sup>: n=3 mice). Non-treated HC harvested at the same time points served as controls (C57BL/6: n=12, HMGB1<sup>-/-</sup>: n=11 mice). Results are presented as the mean  $\pm$  SEM (significance level set at  $P < 0.05$ , analyzed by Two-Way ANOVA followed by Holm-Sidak *post hoc* test).

Suppl. Fig. 1

### Eotaxin

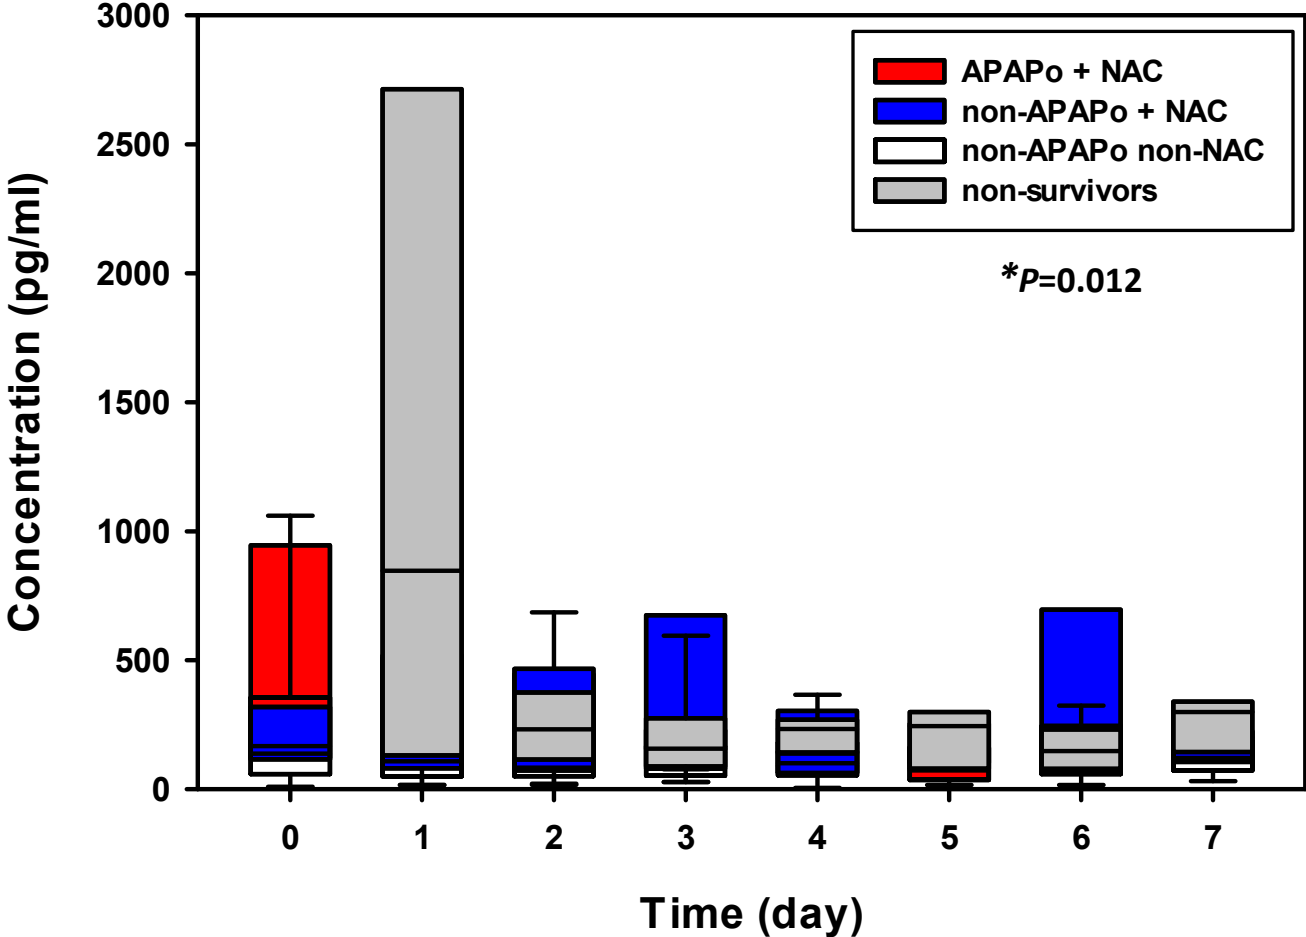

Suppl. Fig. 1

### GM-CSF

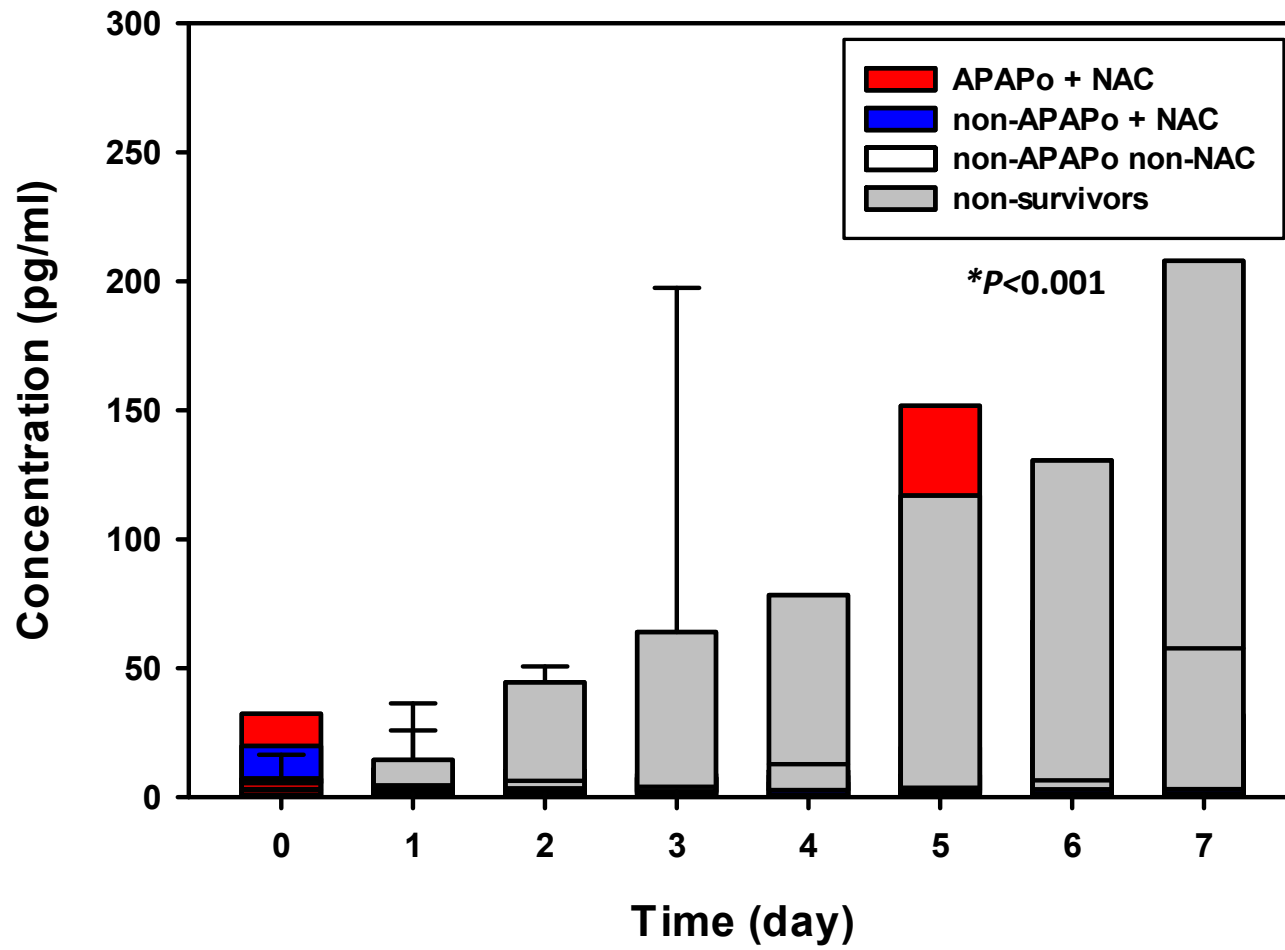

Suppl. Fig. 1

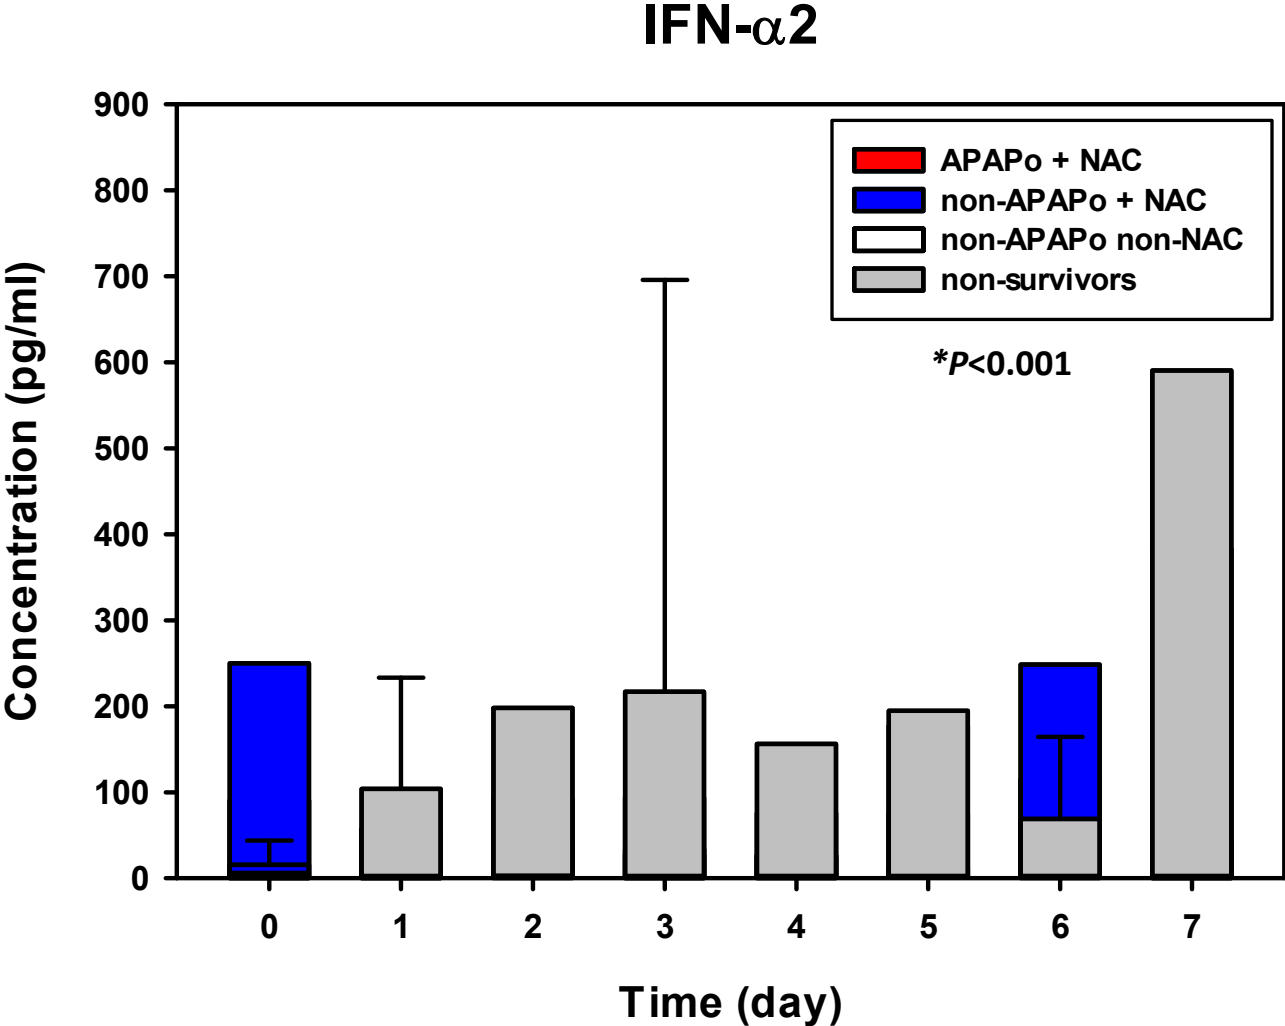

Suppl. Fig. 1

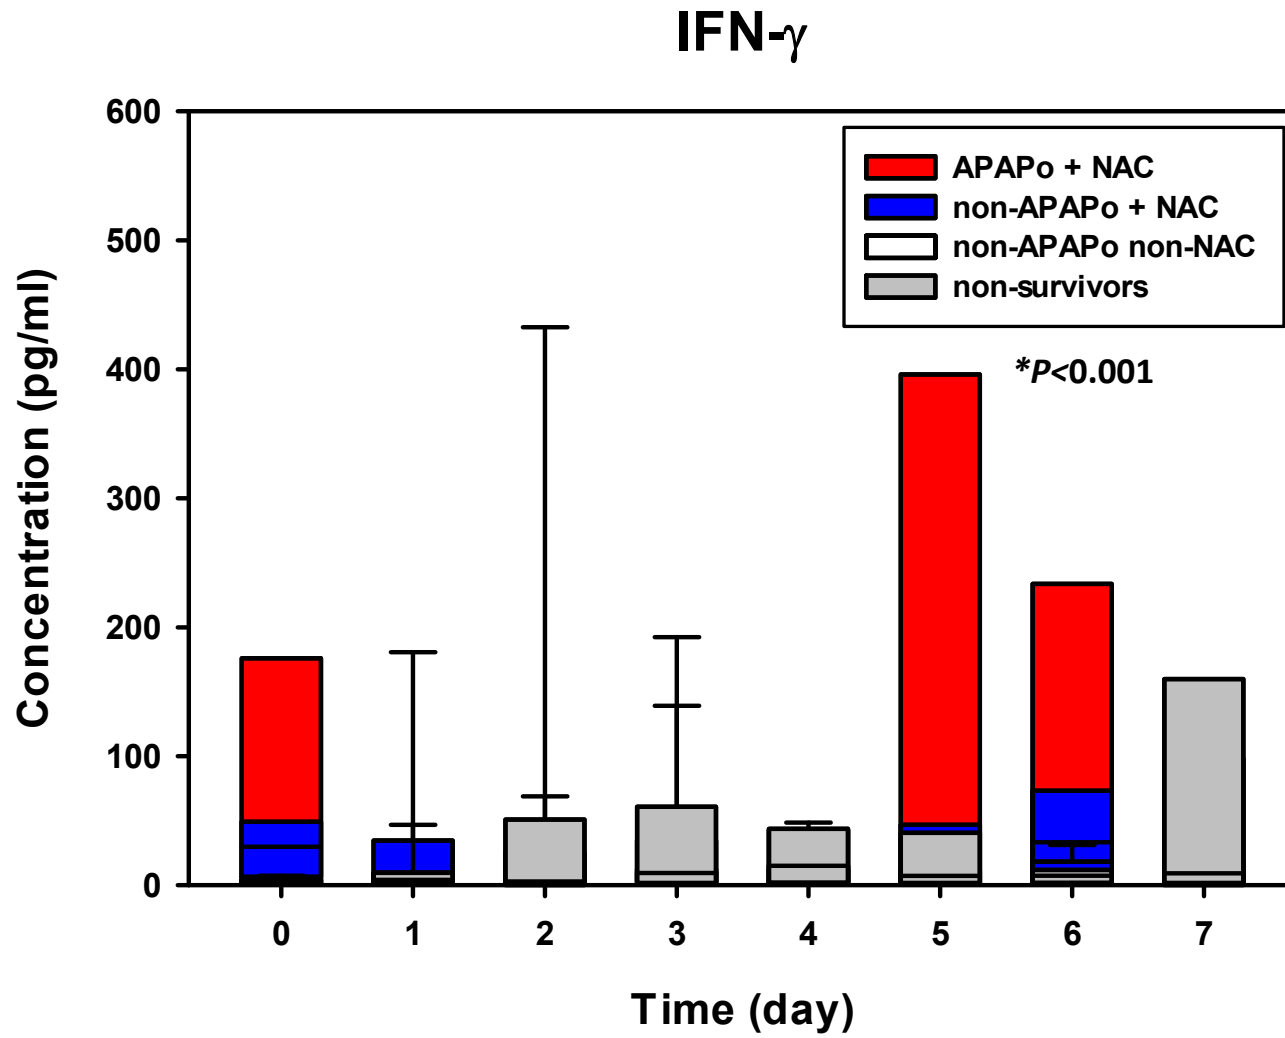

Suppl. Fig. 1

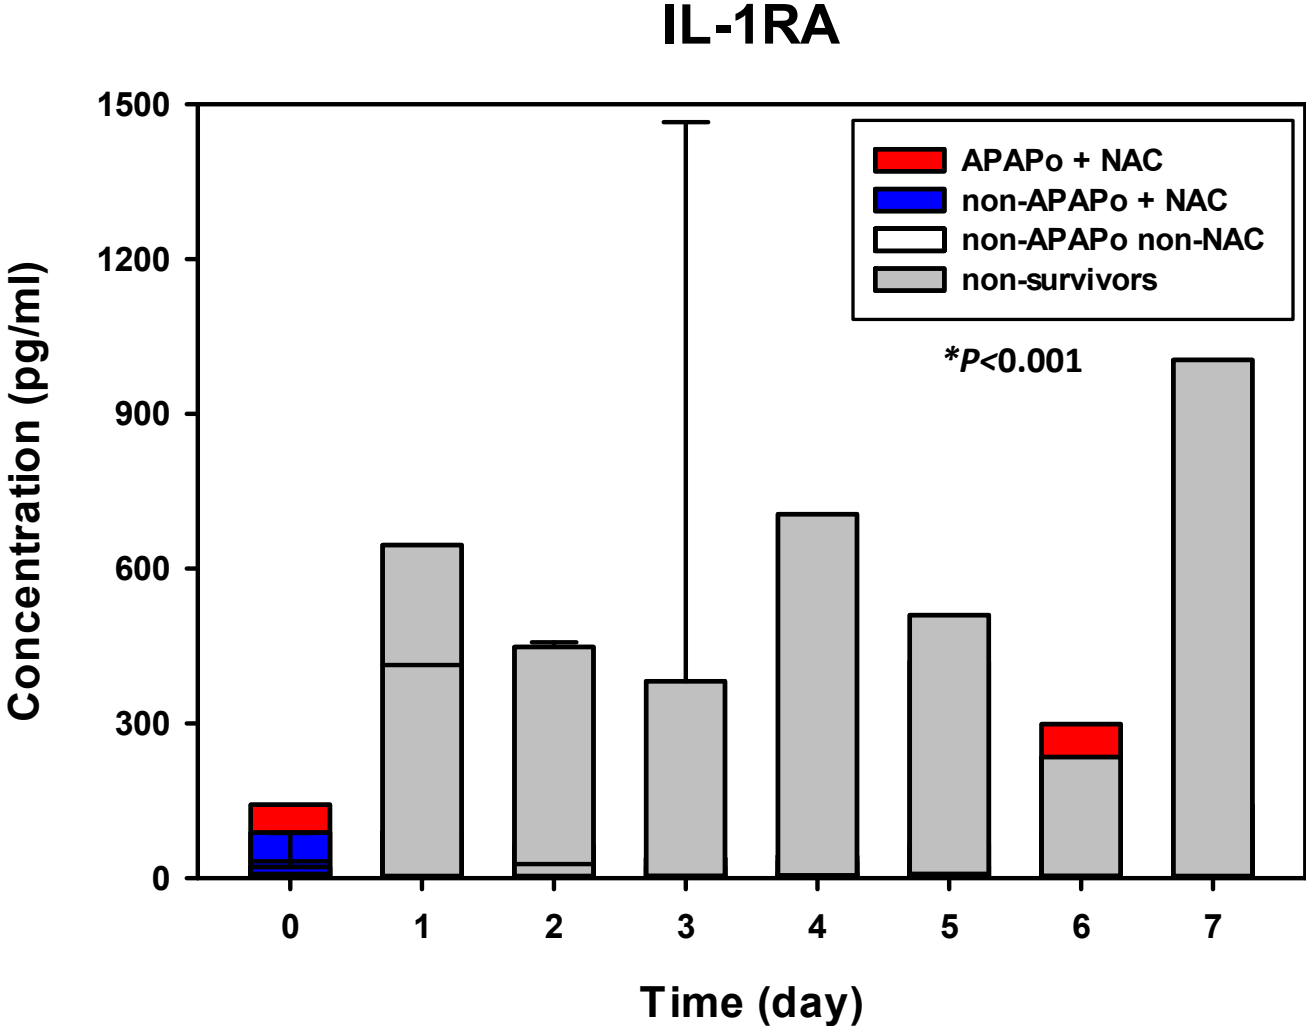

Suppl. Fig. 1

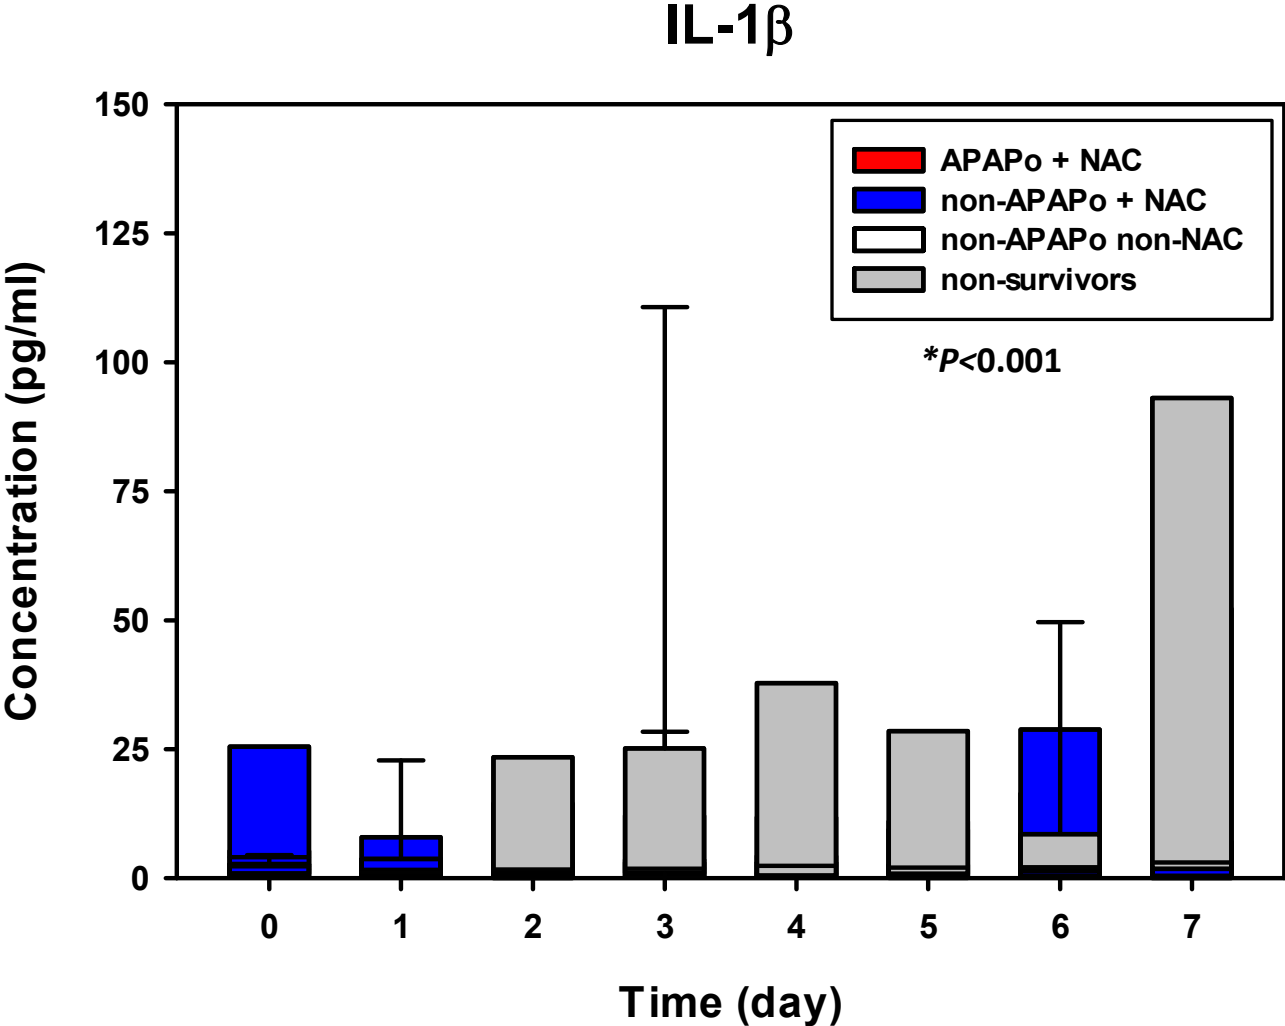



Suppl. Fig. 1

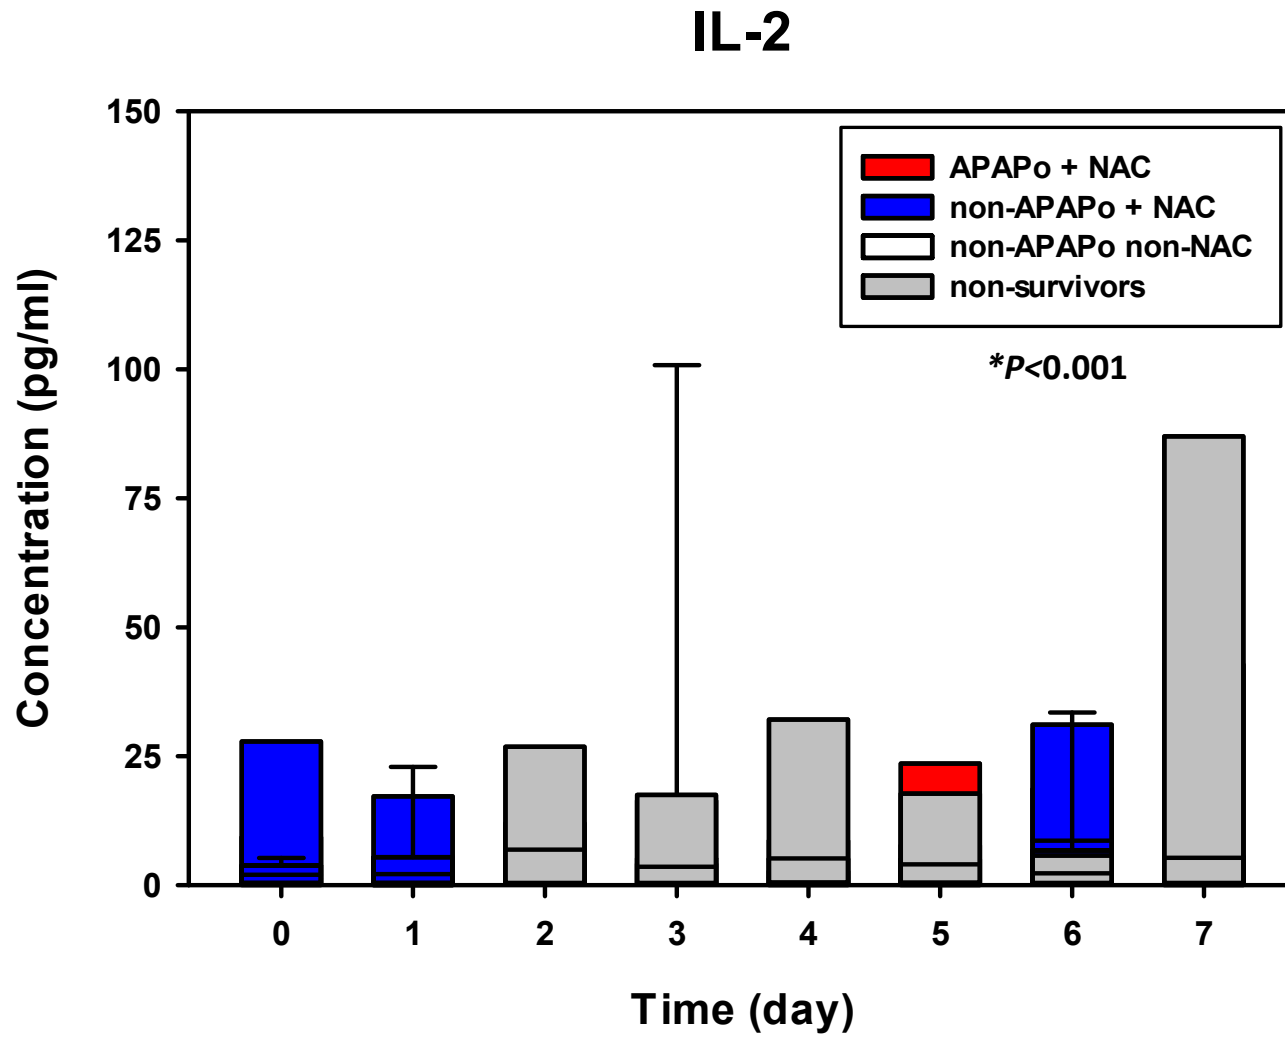

Suppl. Fig. 1

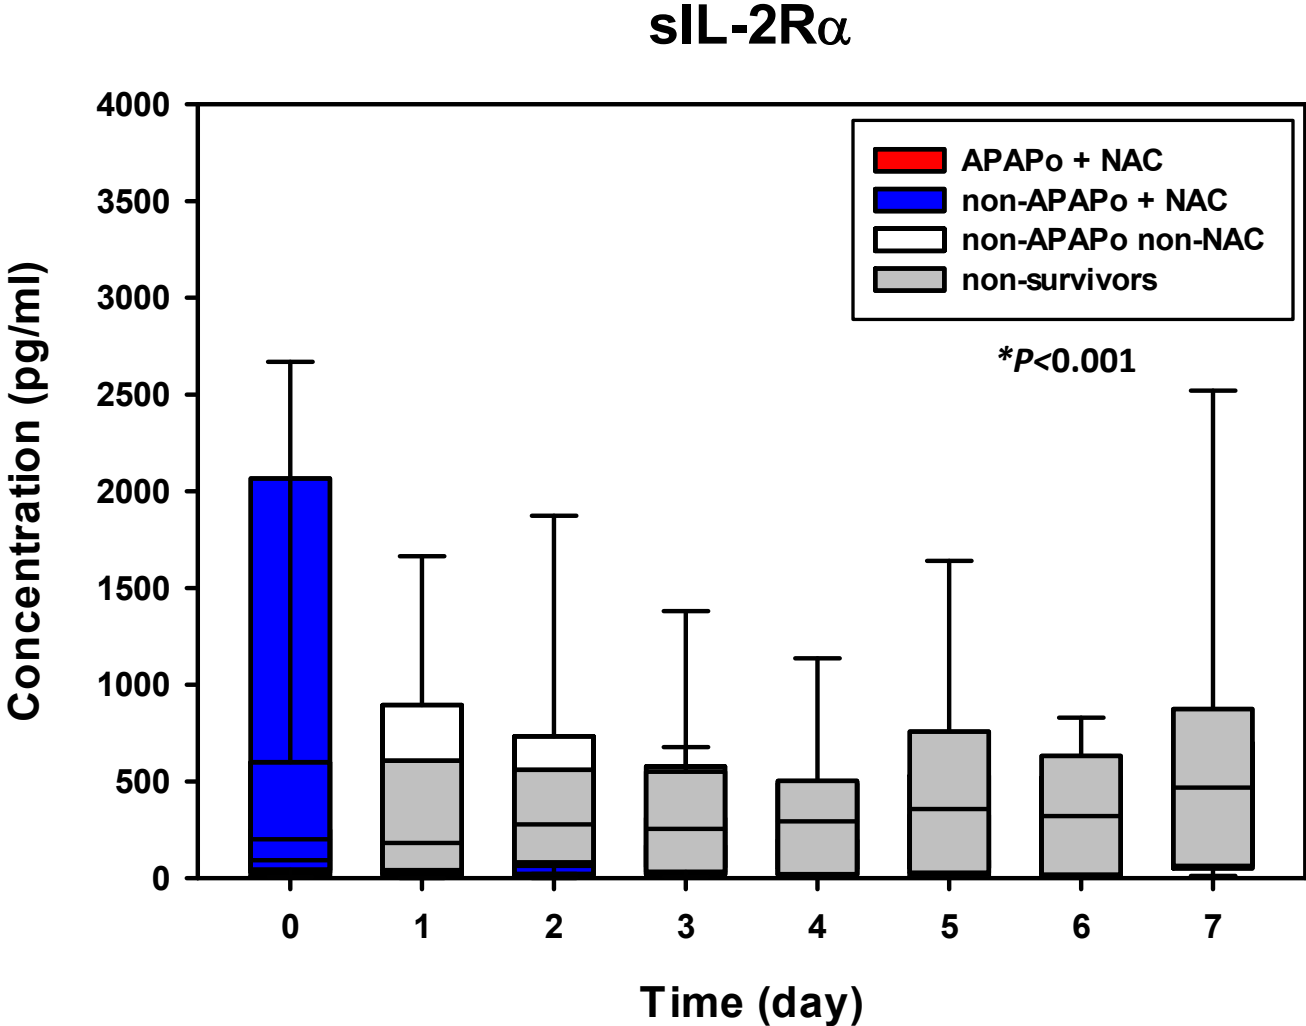

Suppl. Fig. 1

### IL-4

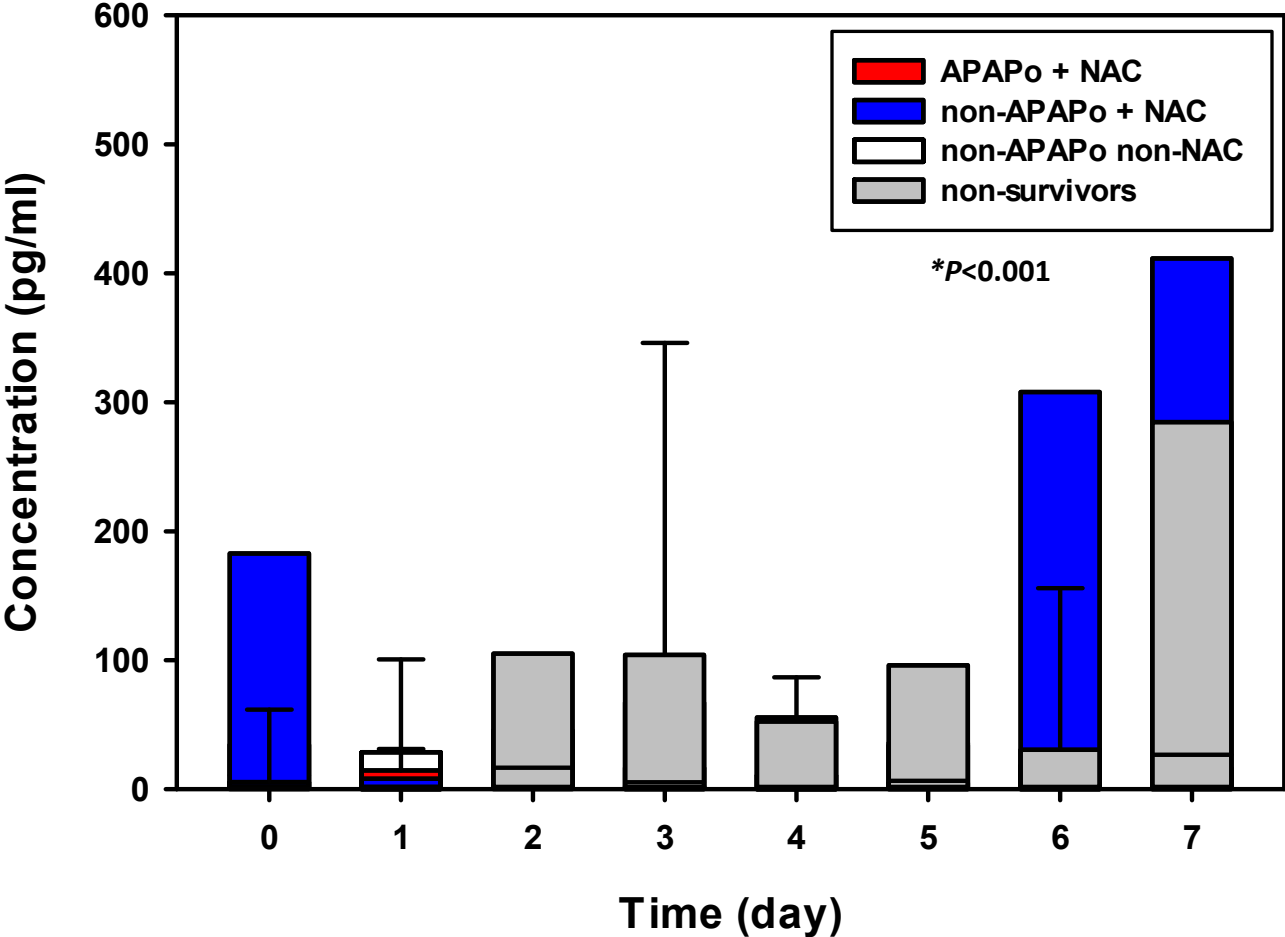

Suppl. Fig. 1

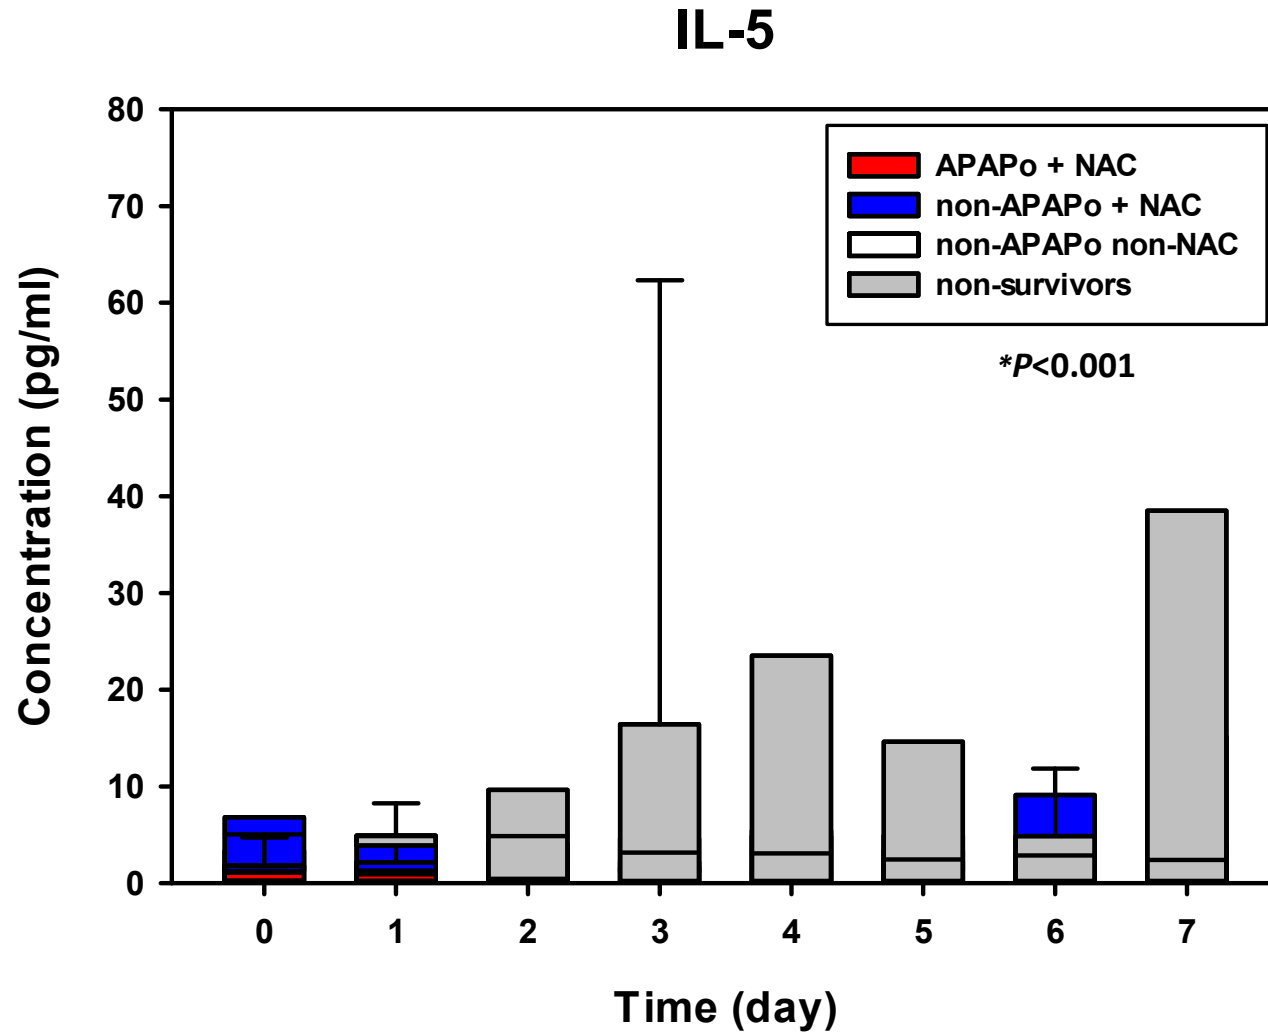

Suppl. Fig. 1

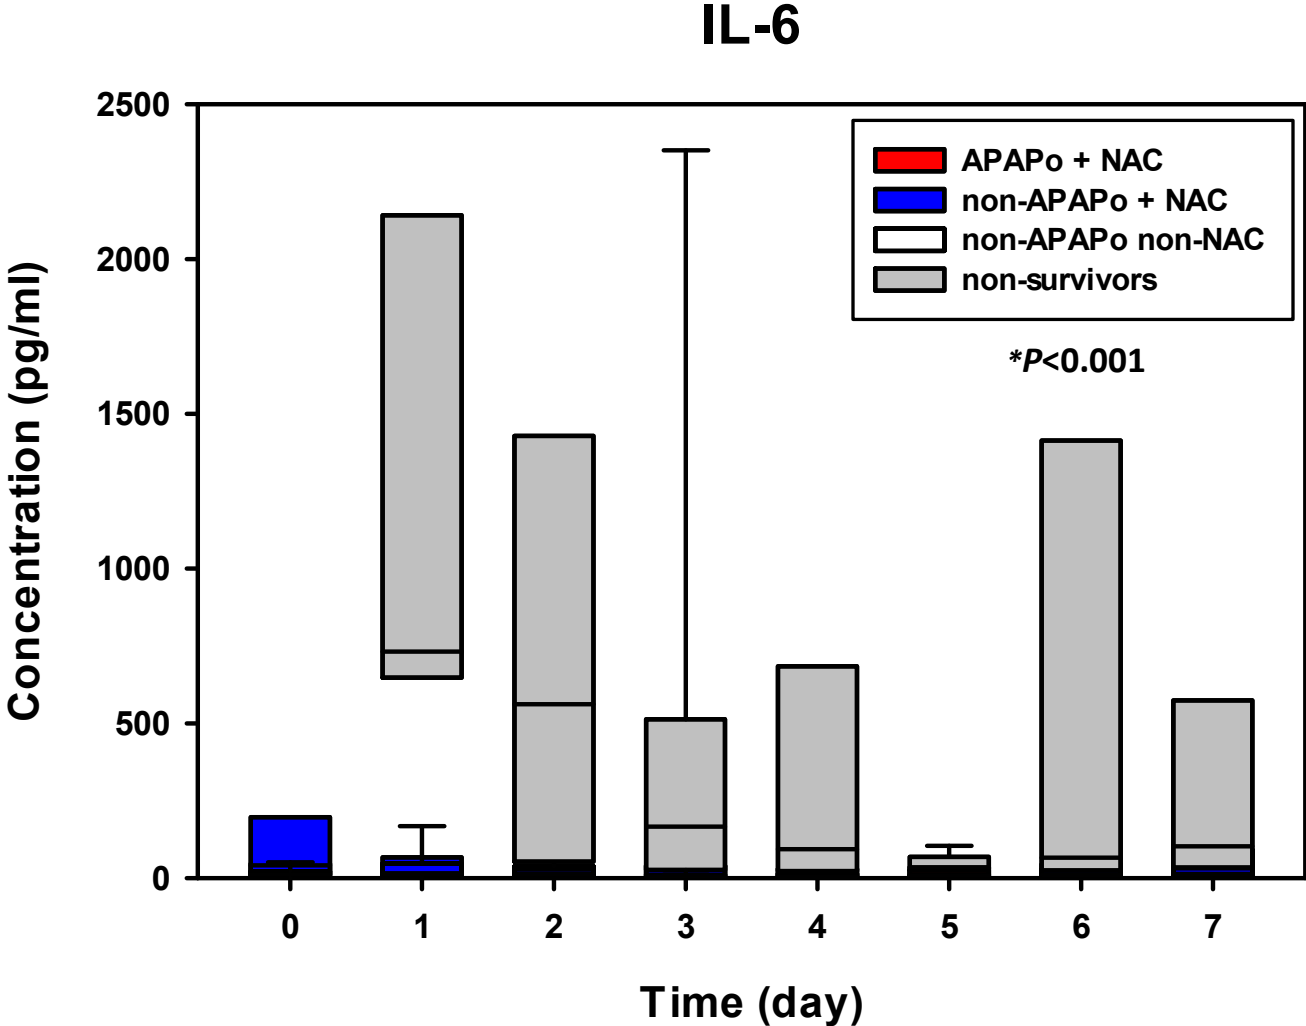

Suppl. Fig. 1

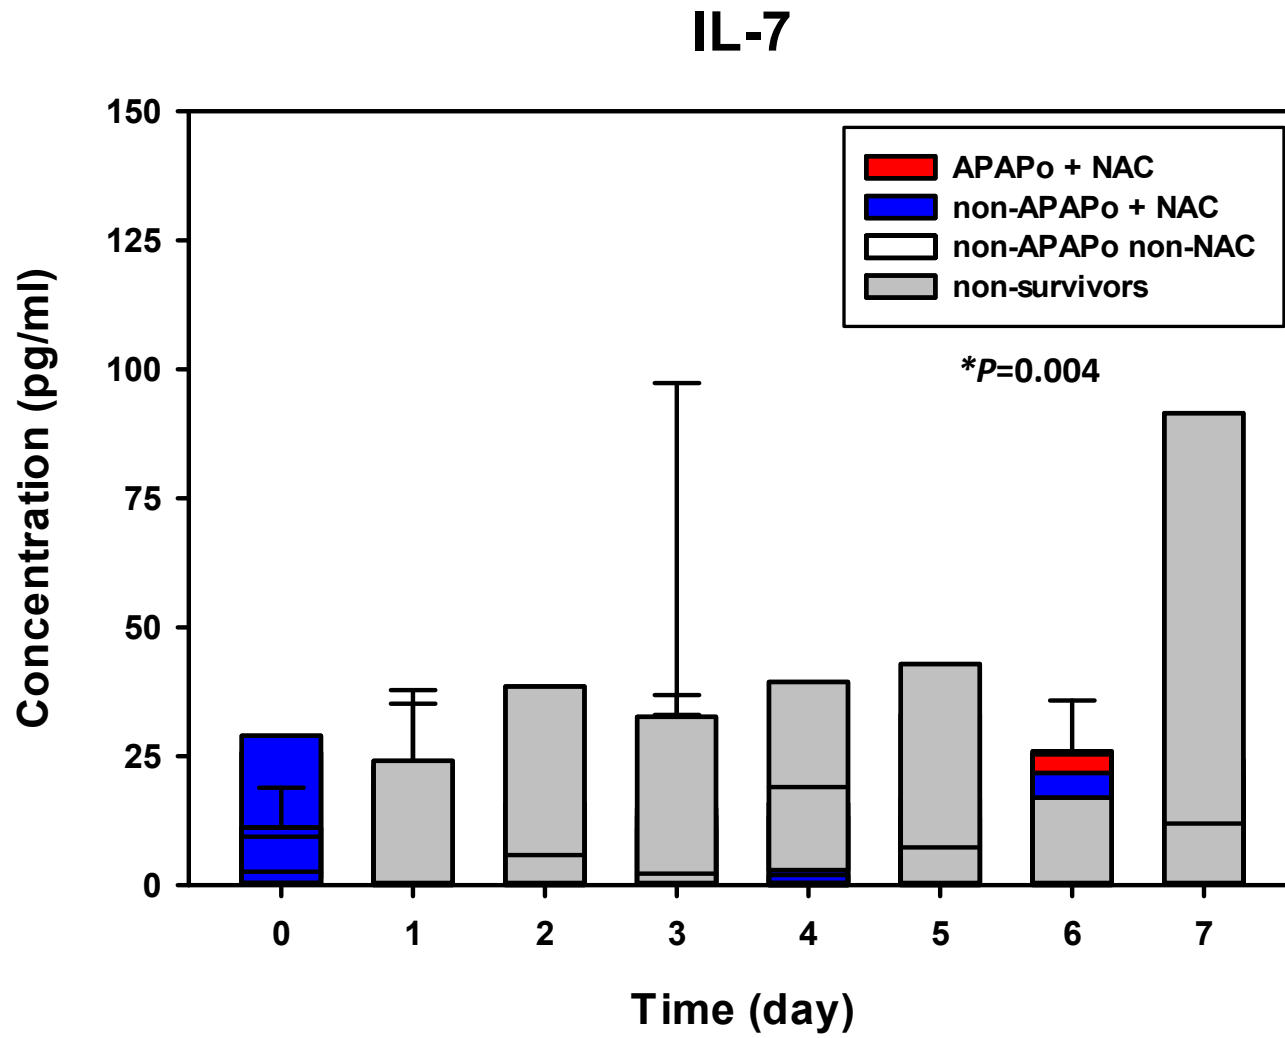

Suppl. Fig. 1

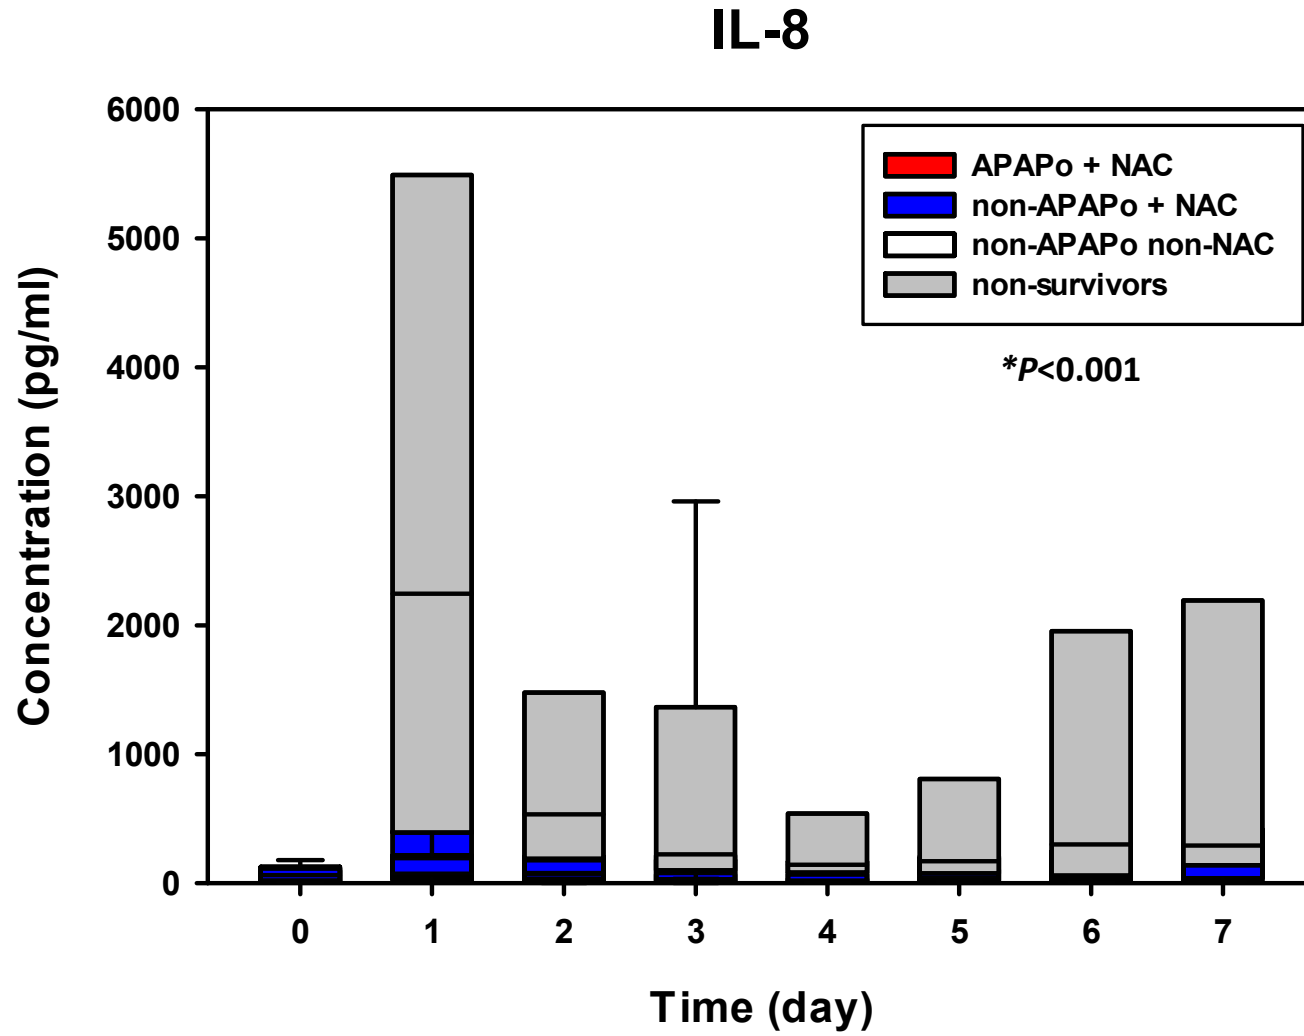

Suppl. Fig. 1

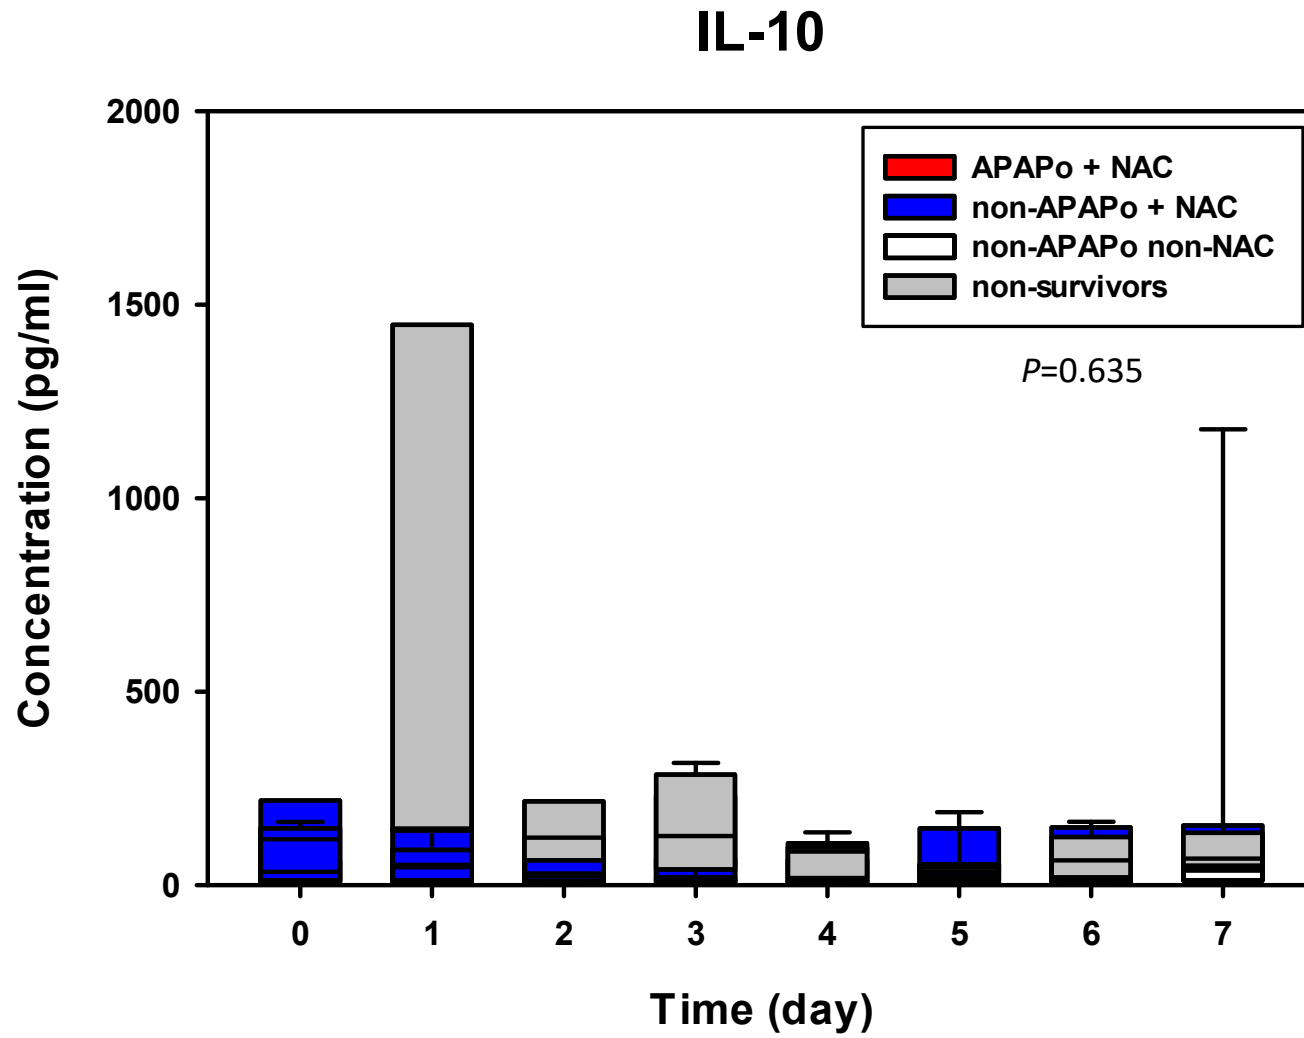



Suppl. Fig. 1

### IL-12p40

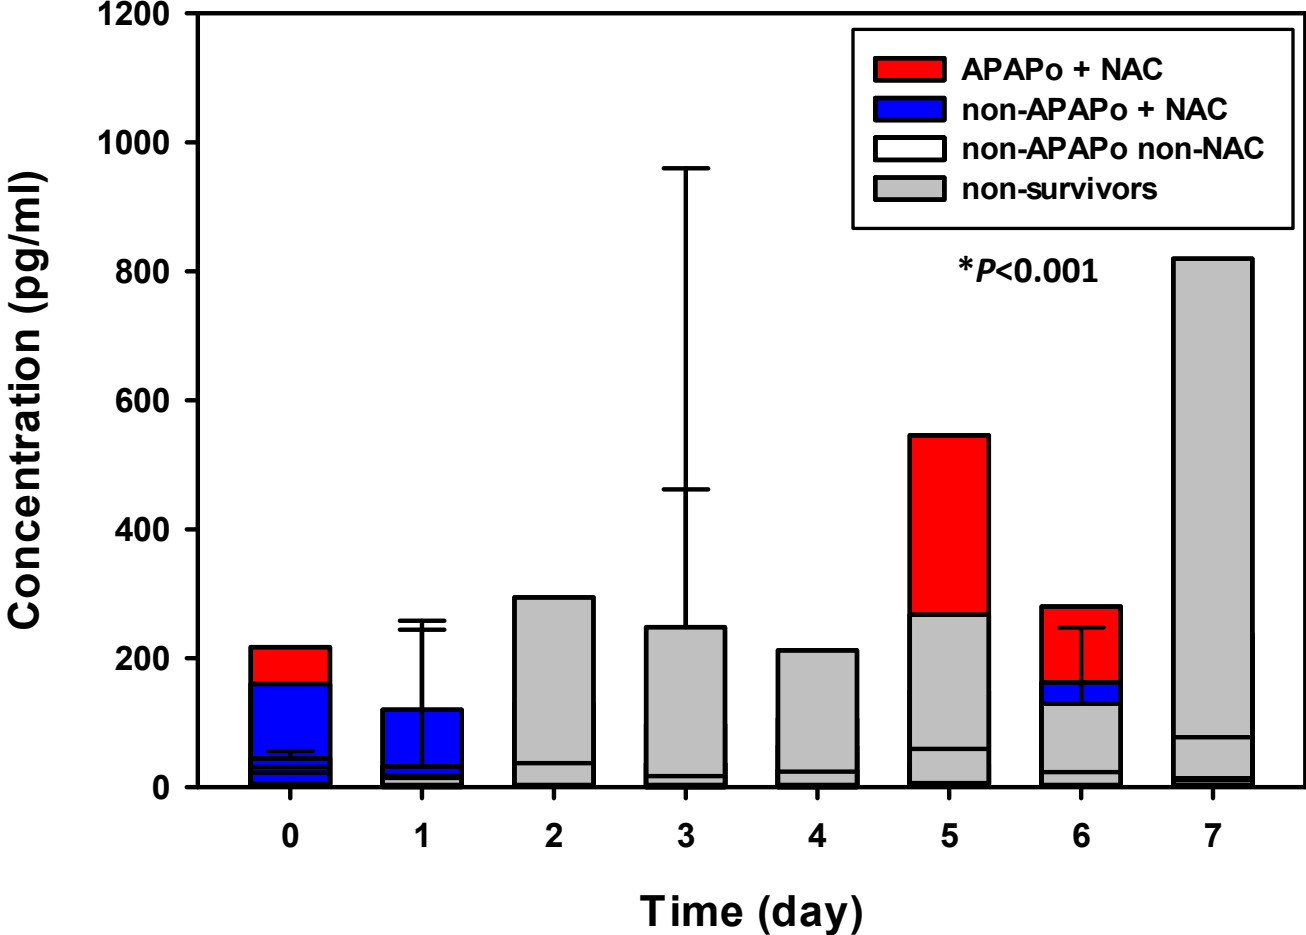

Suppl. Fig. 1

### IL-12p70

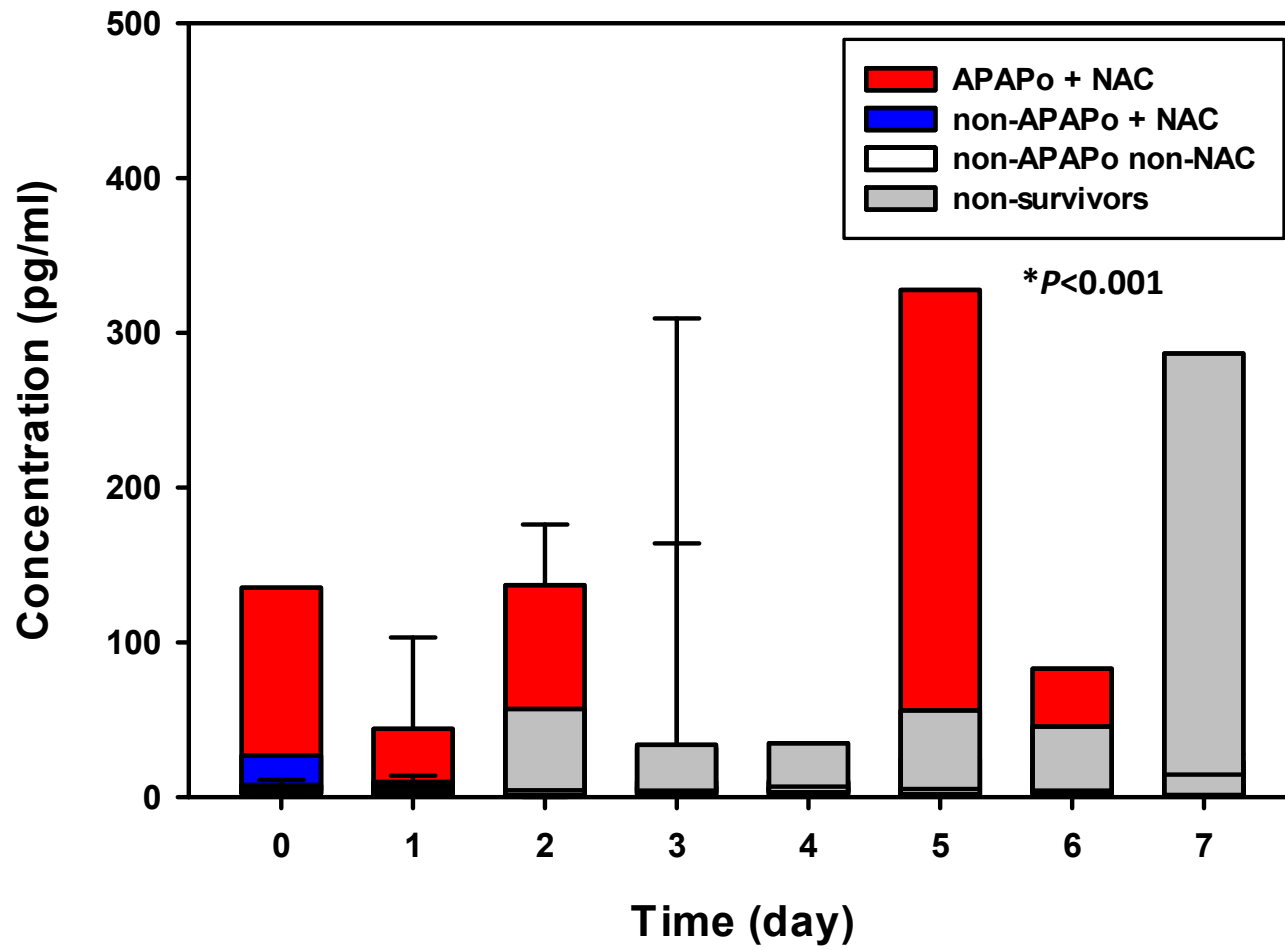

Suppl. Fig. 1

# IL-13

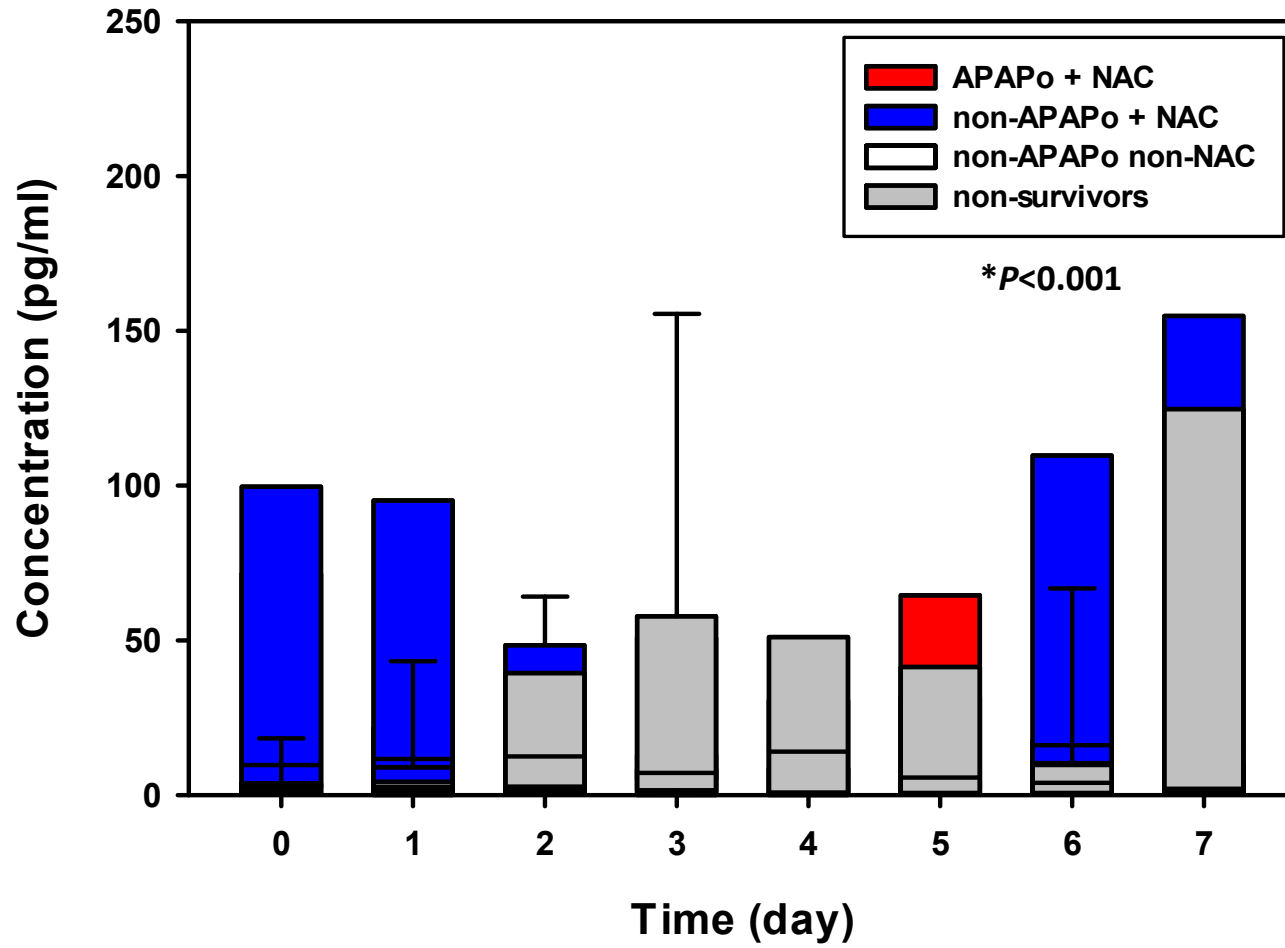

Suppl. Fig. 1

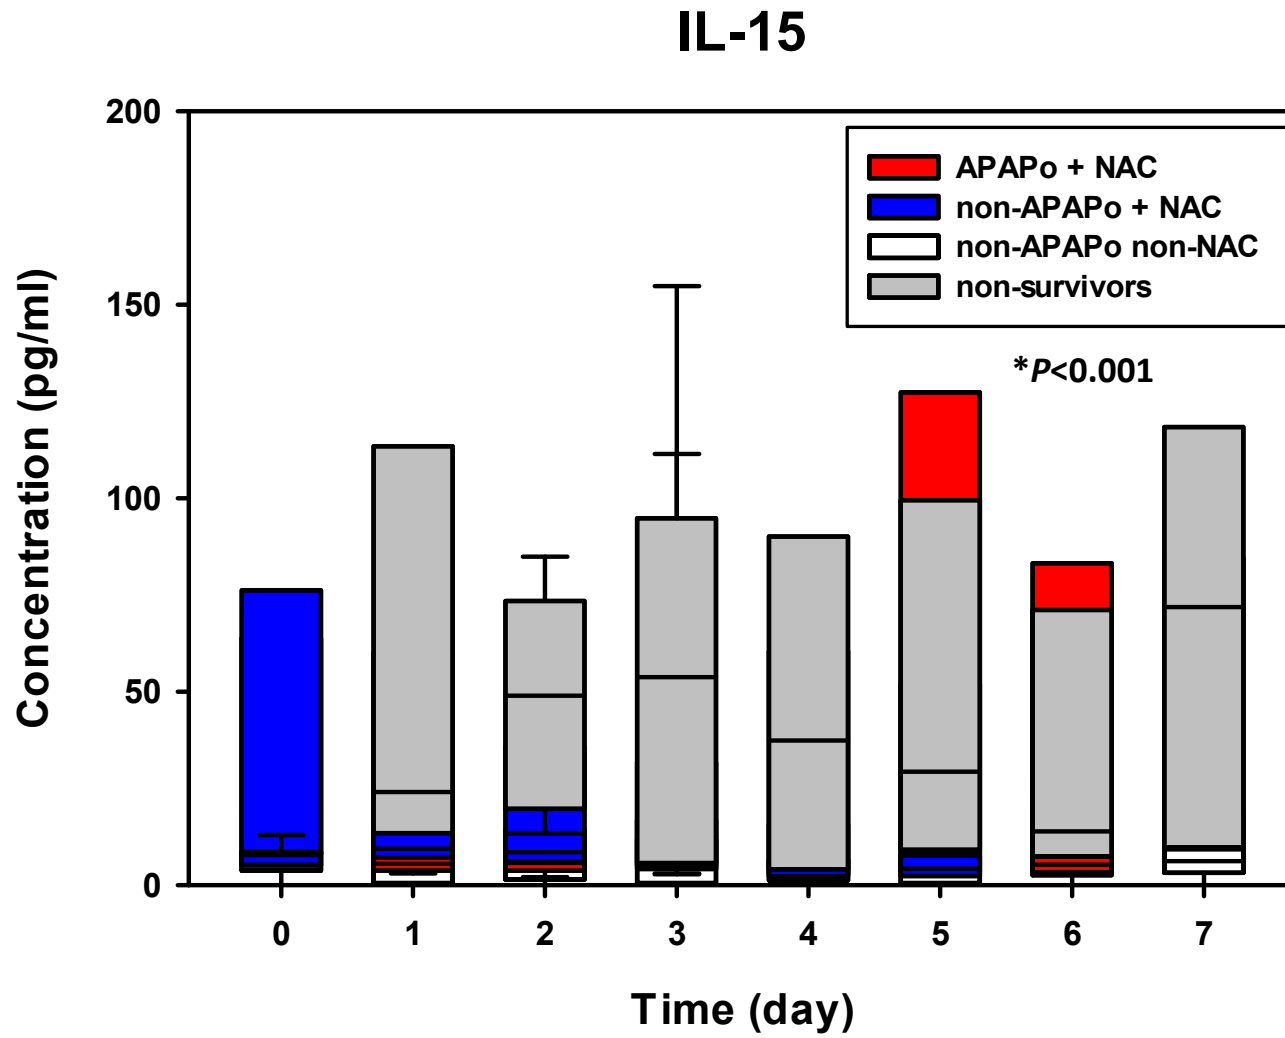

Suppl. Fig. 1

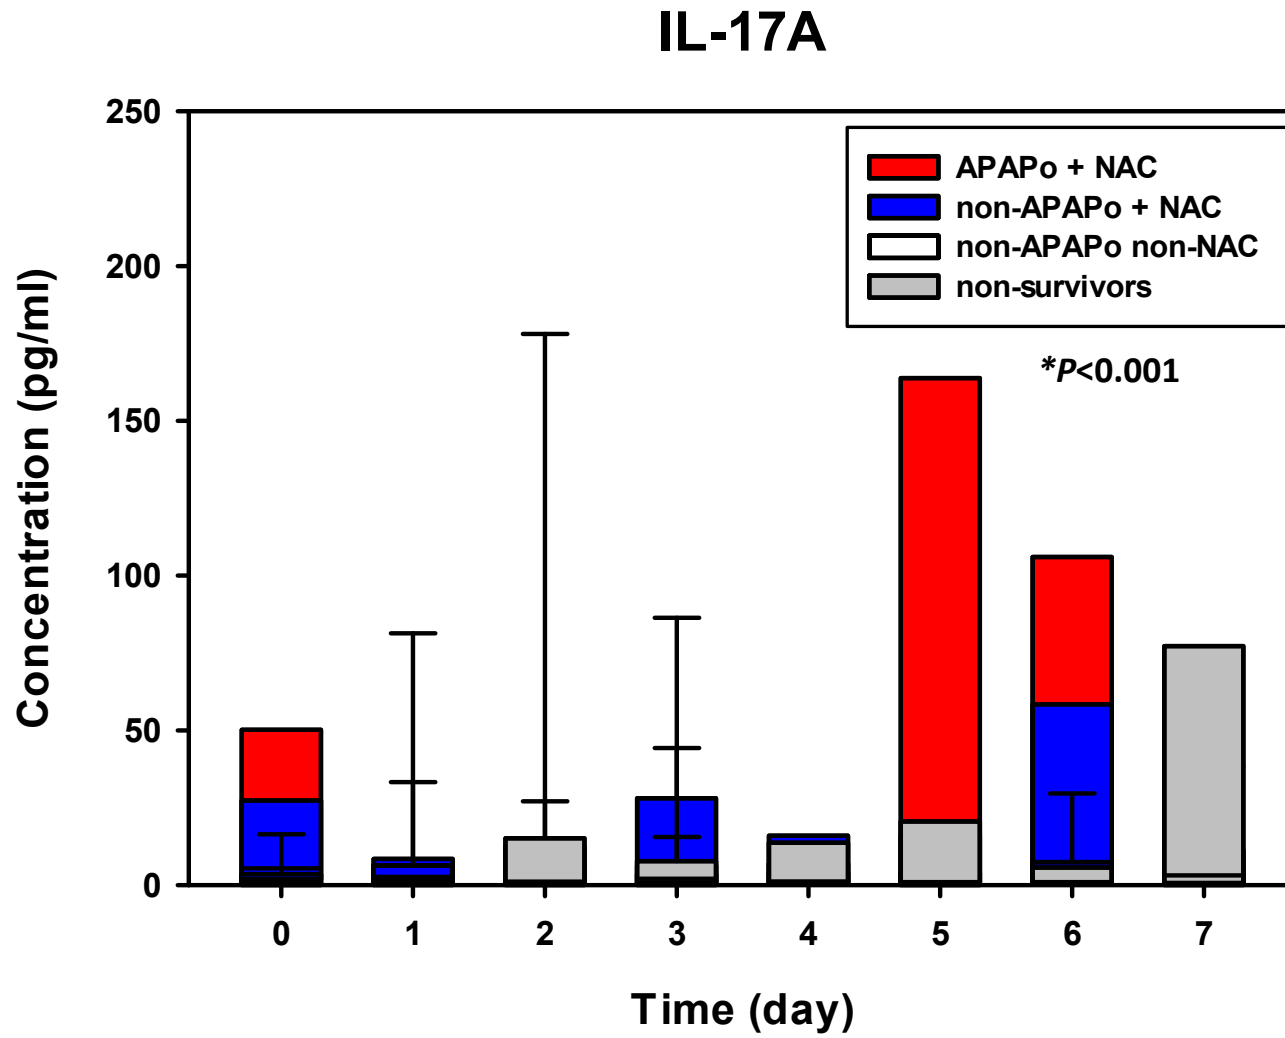

Suppl. Fig. 1

### IP-10

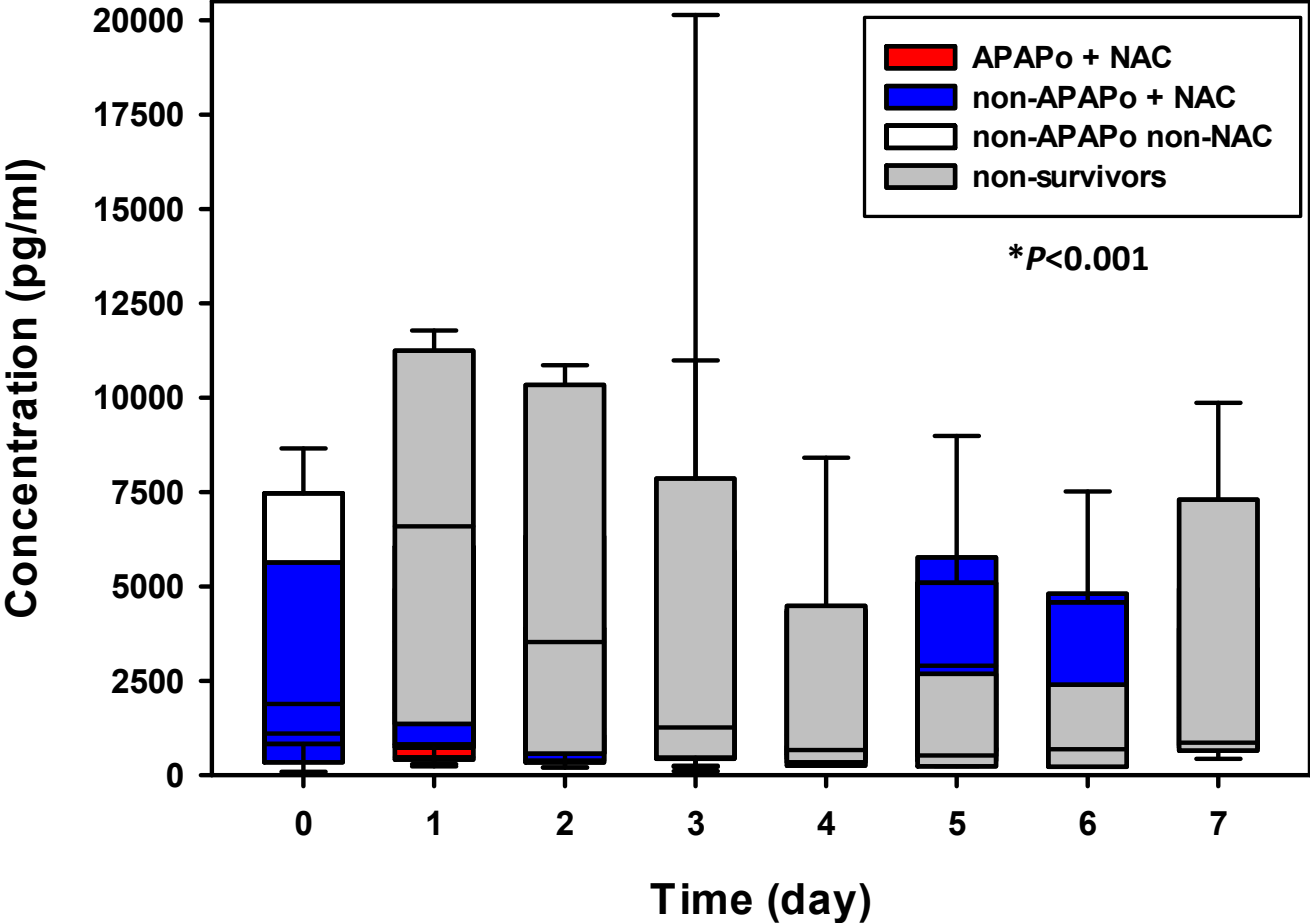

Suppl. Fig. 1

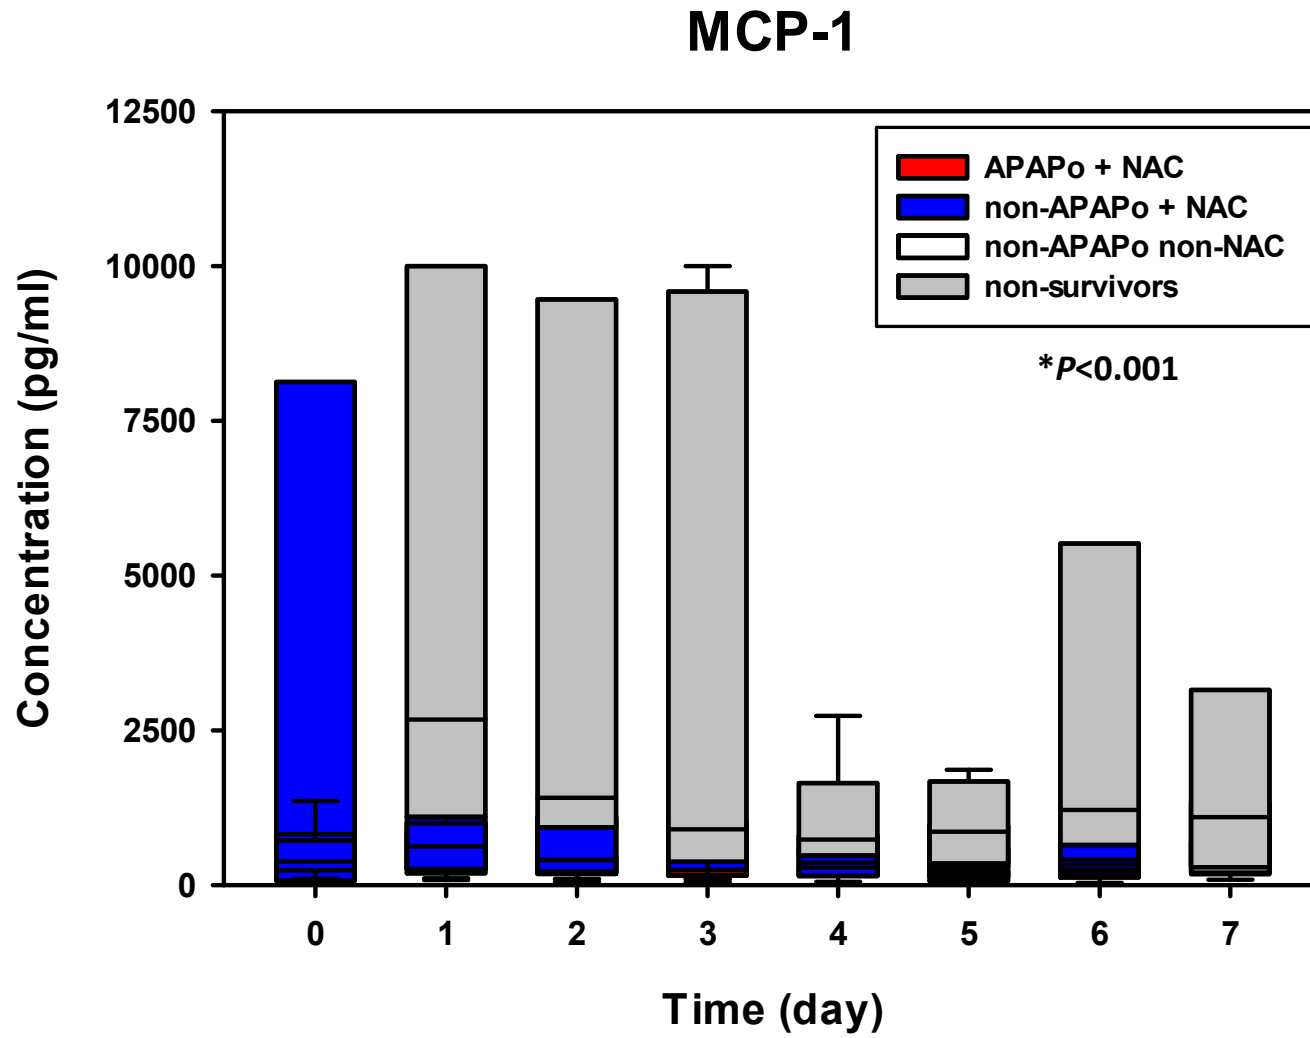

Suppl. Fig. 1

### MIG

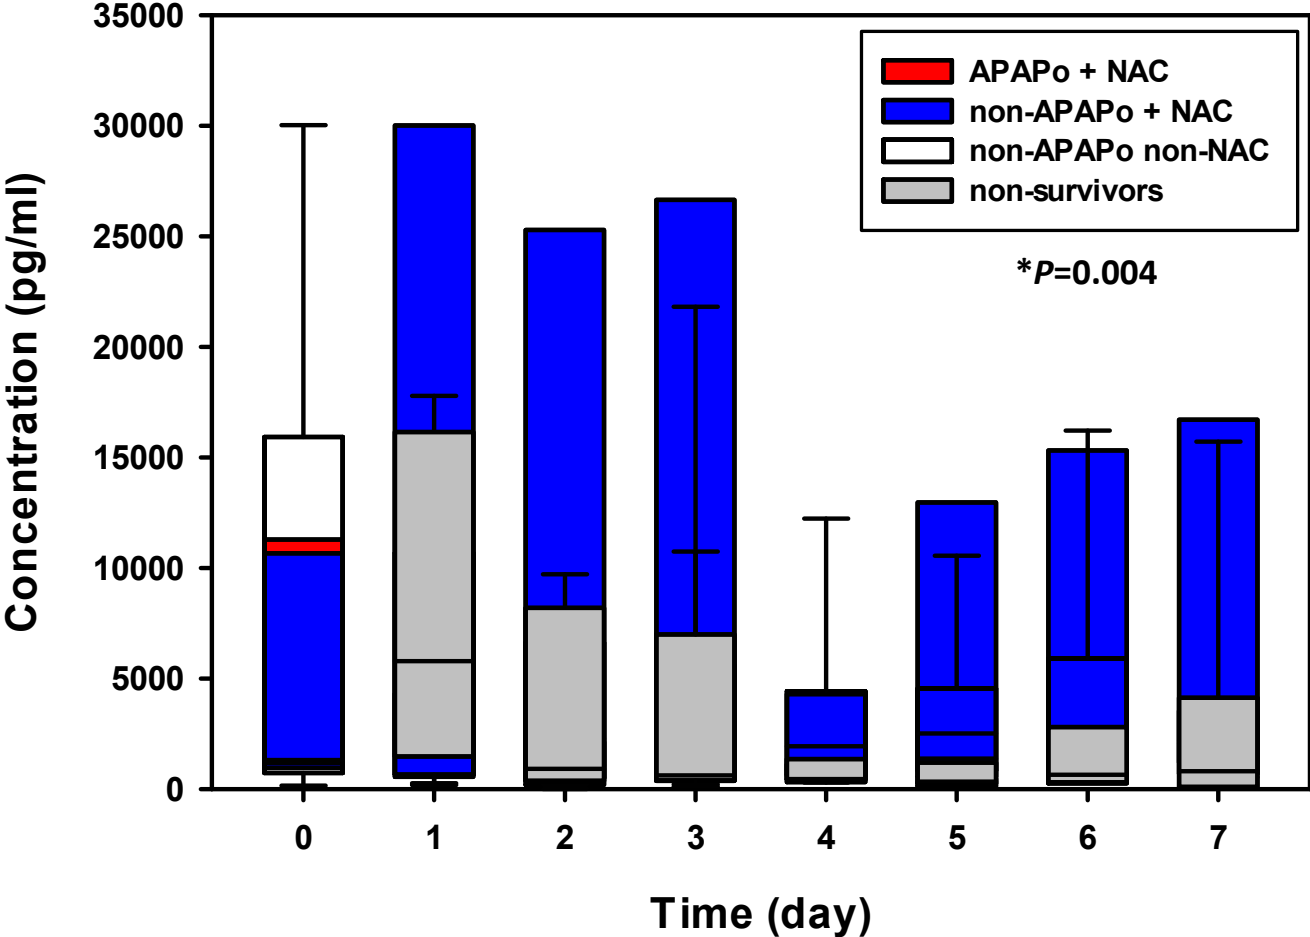



Suppl. Fig. 1

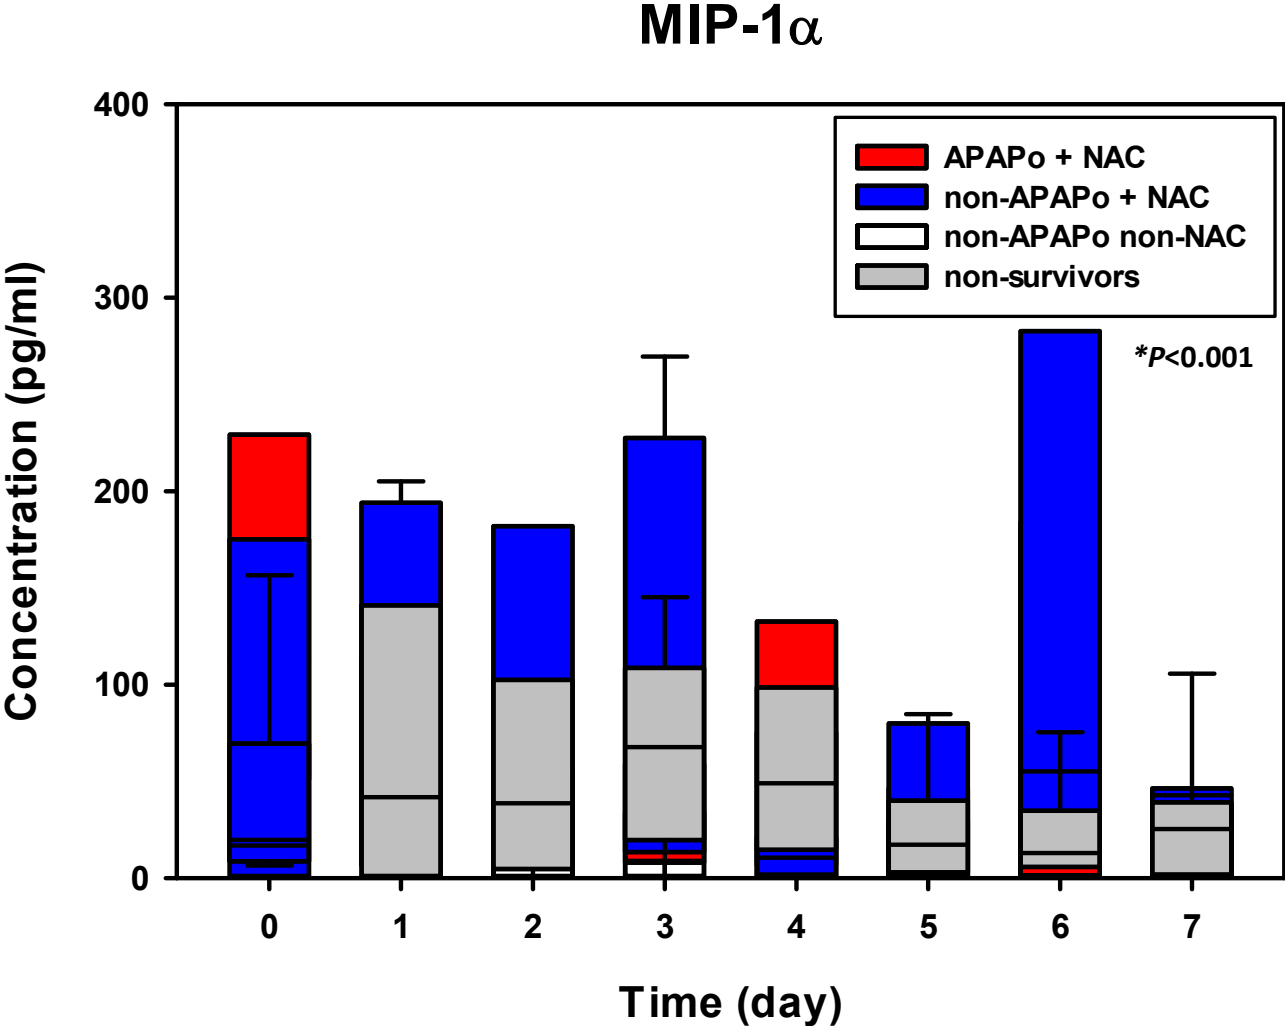

Suppl. Fig. 1

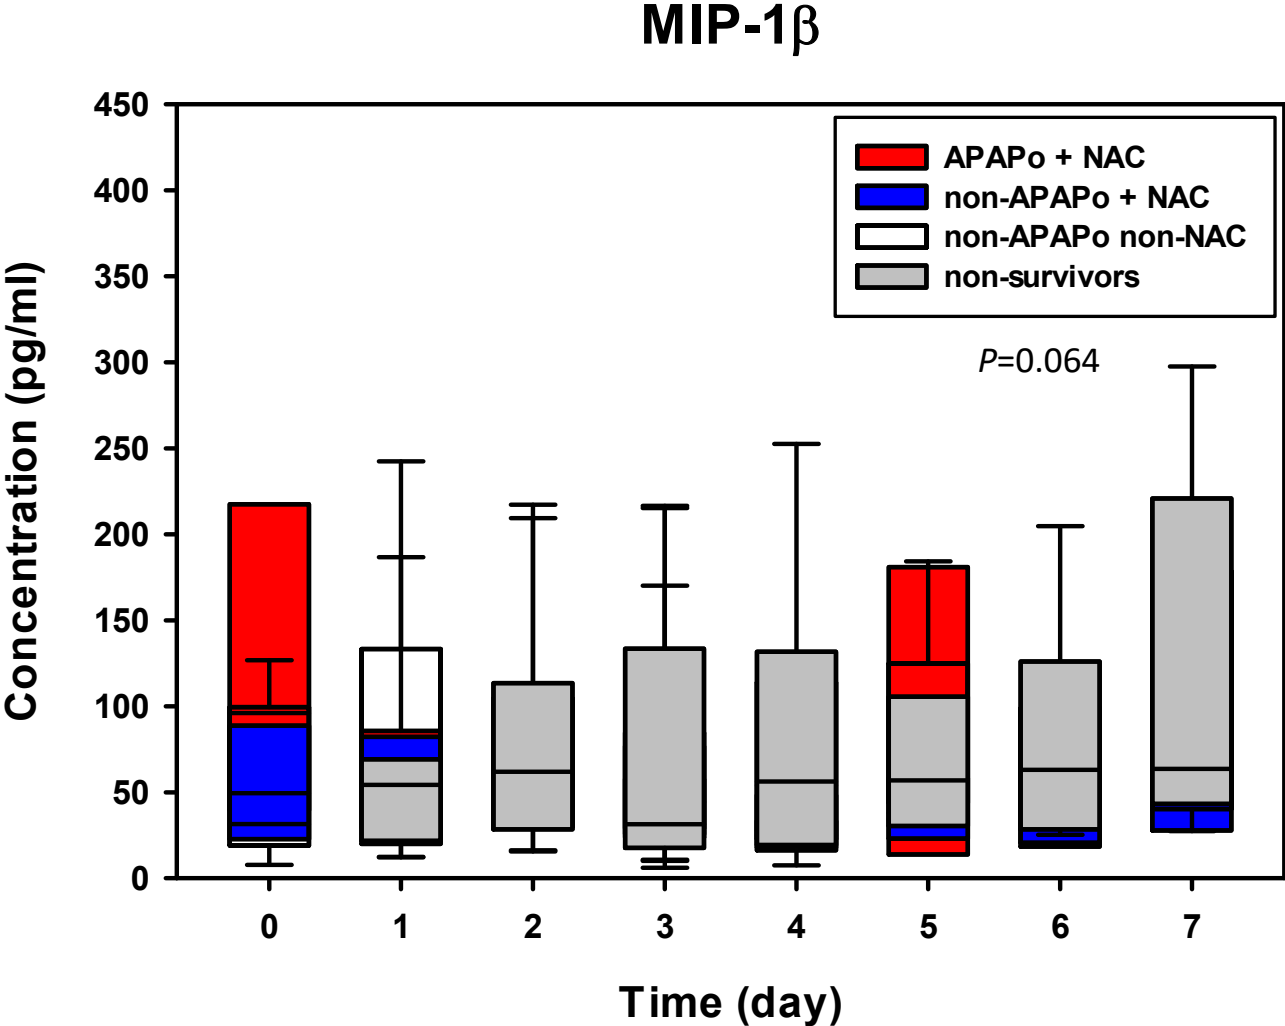

Suppl. Fig. 1

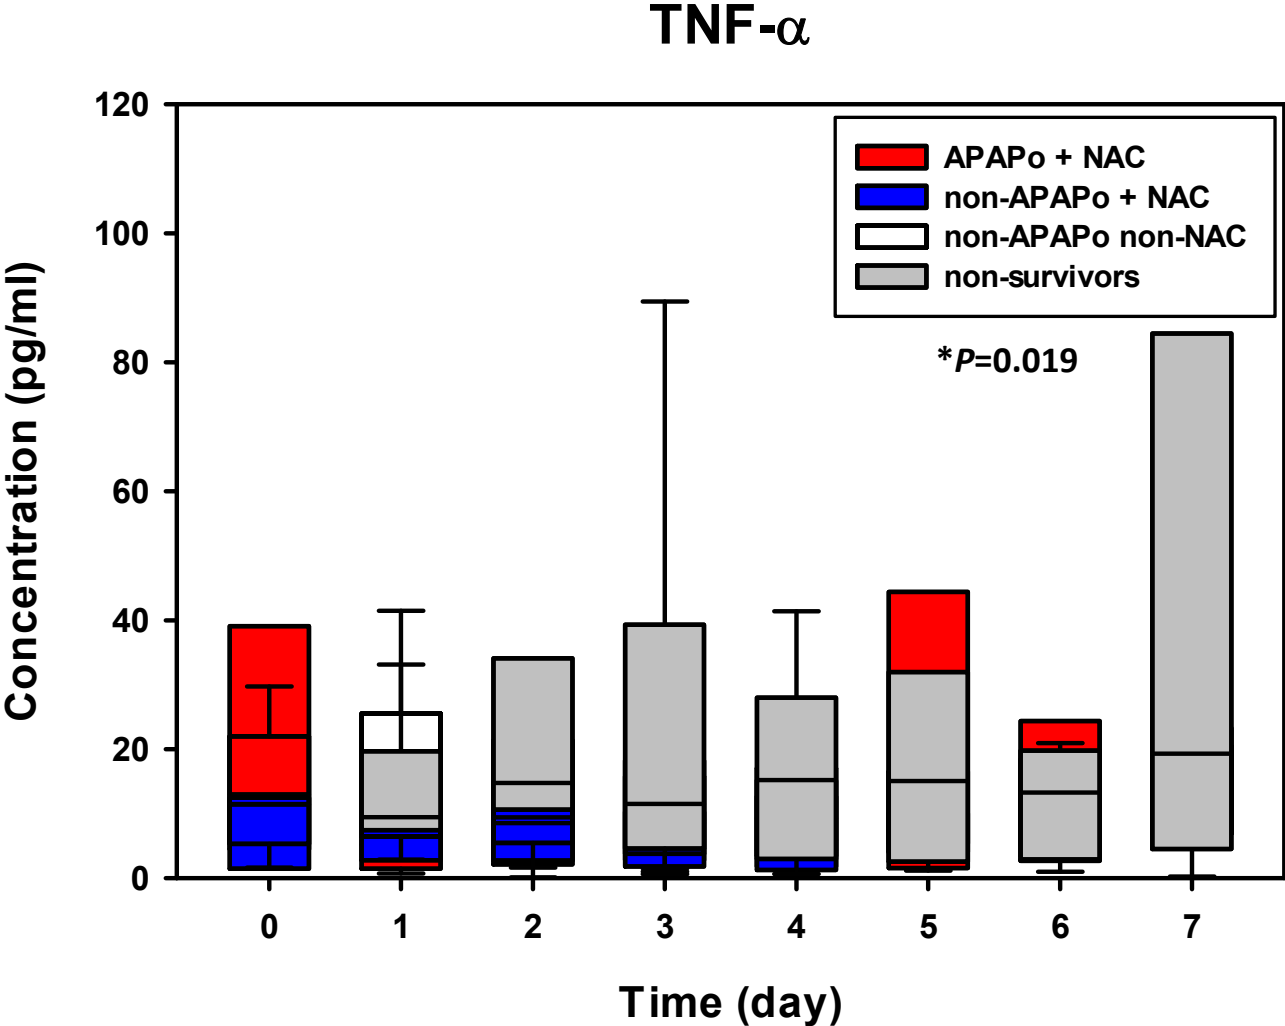

Suppl. Fig. 1

# HMGB1

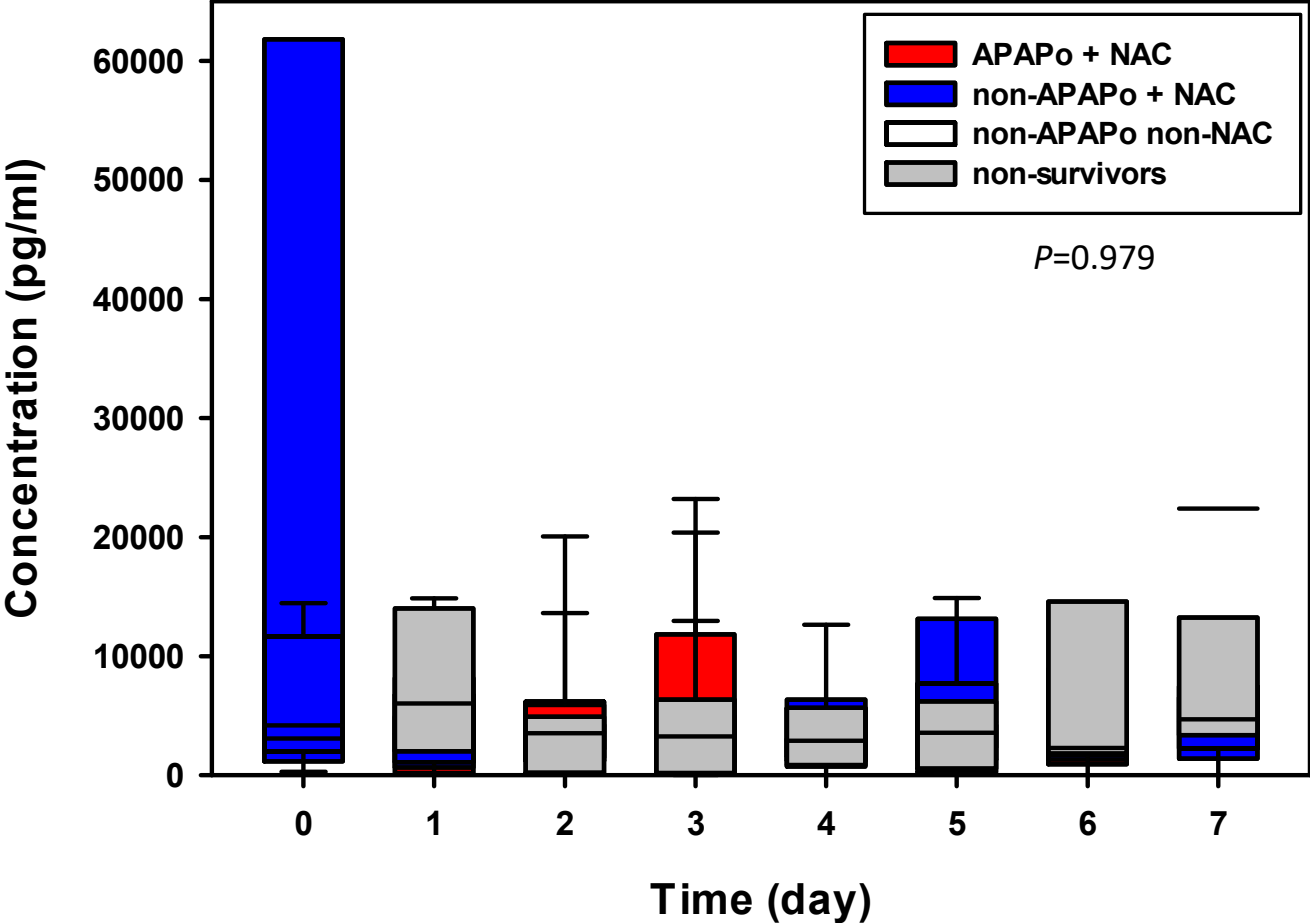

Suppl. Fig. 1

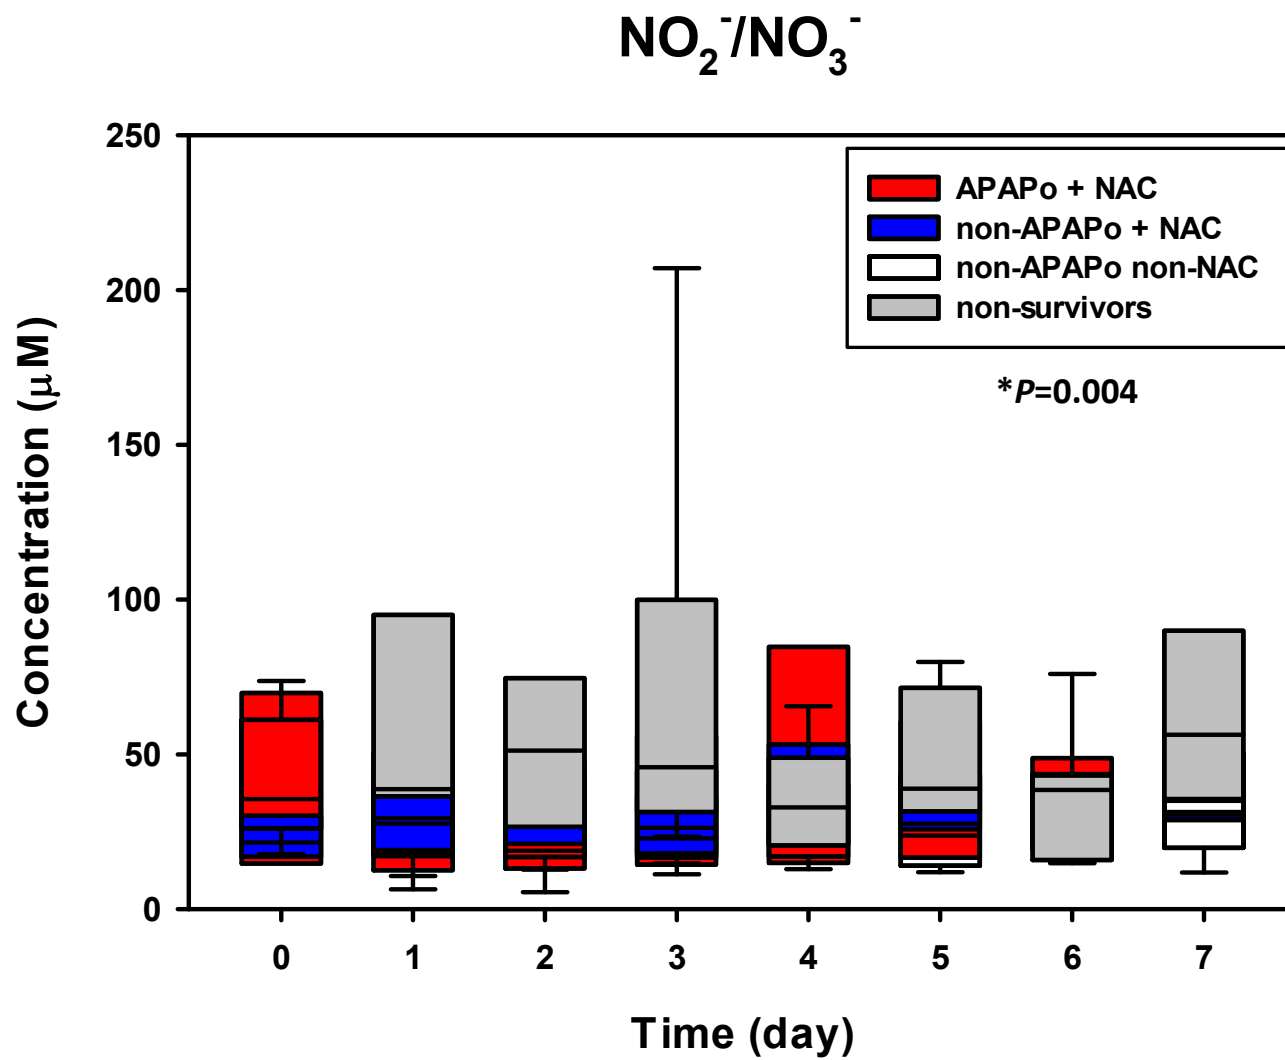

Suppl. Fig. 2

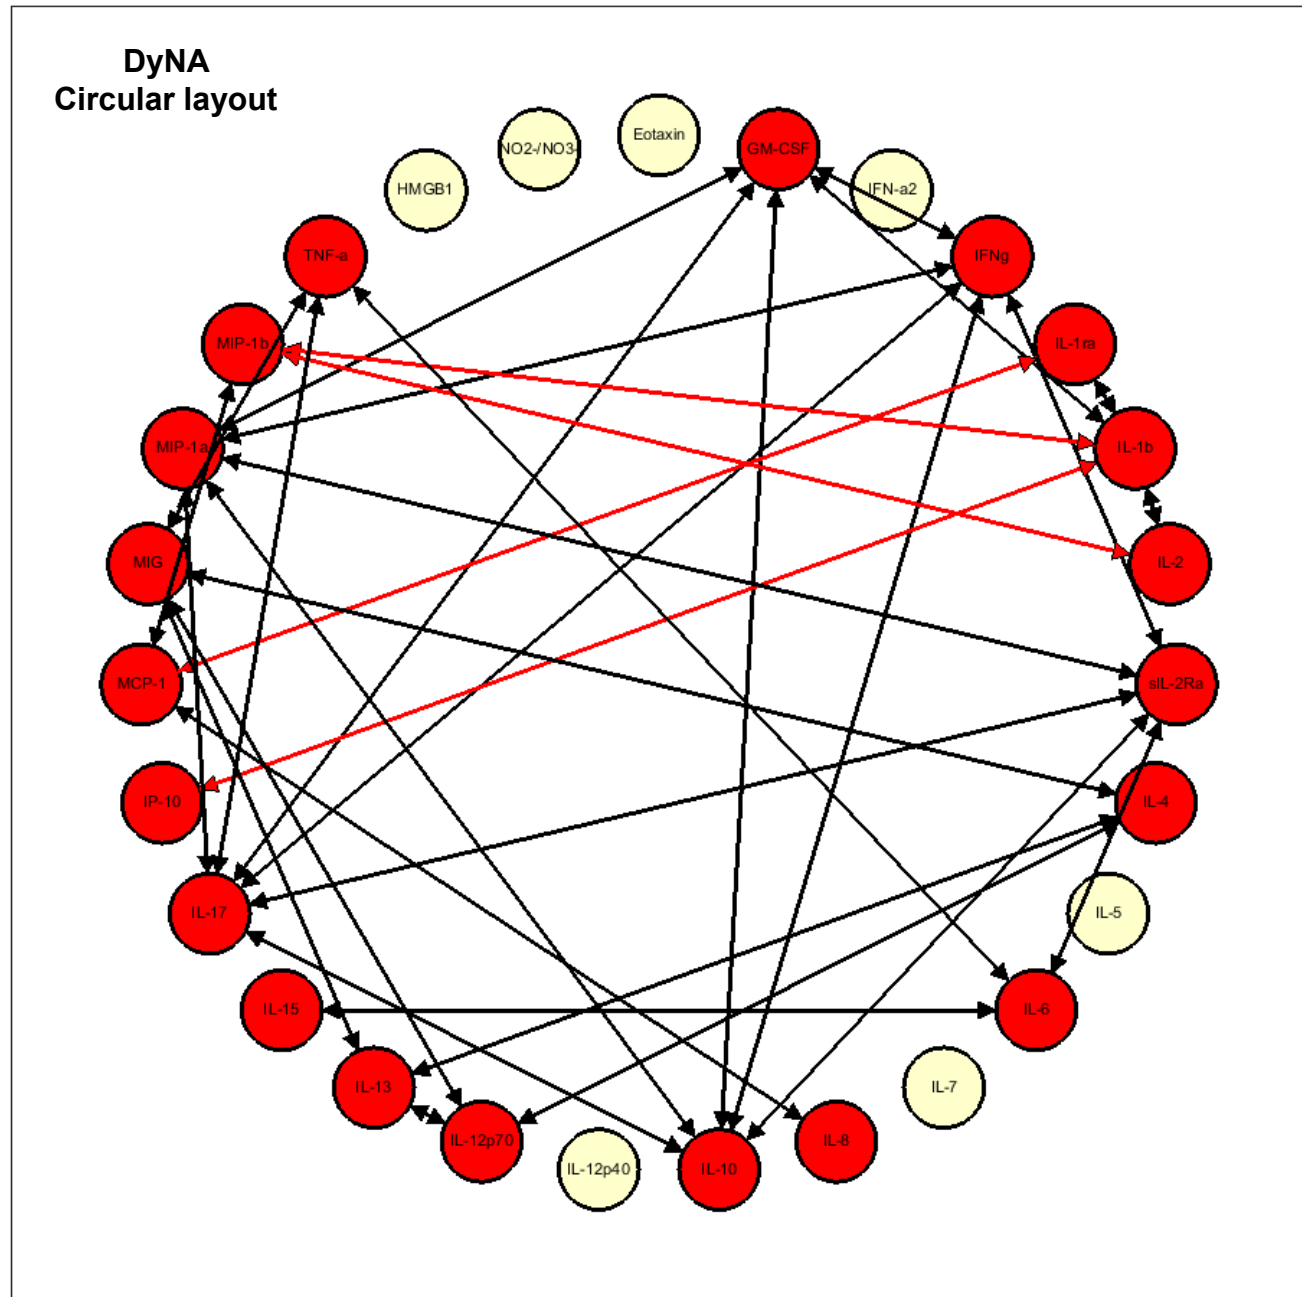

Suppl. Fig. 3

GM-CSF

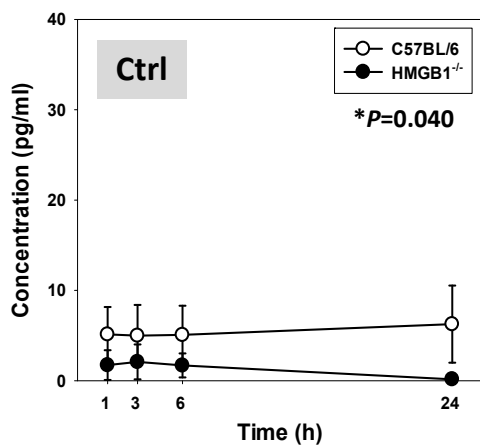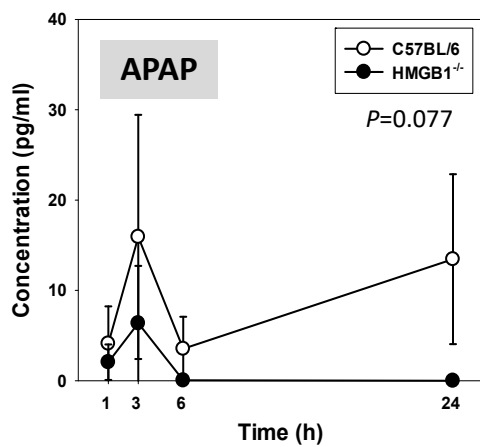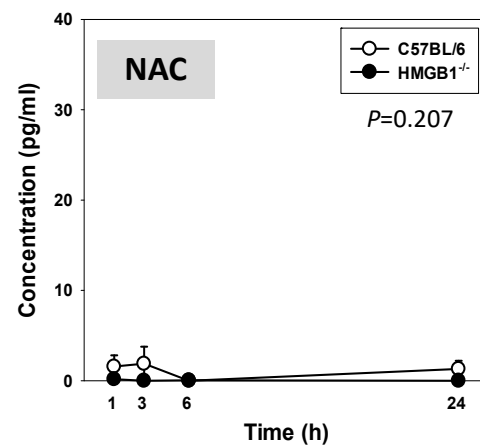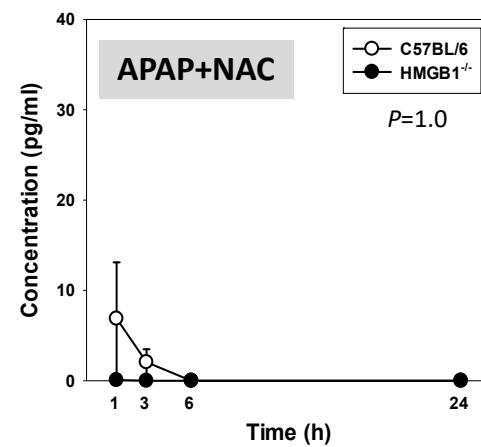

IFN- $\gamma$

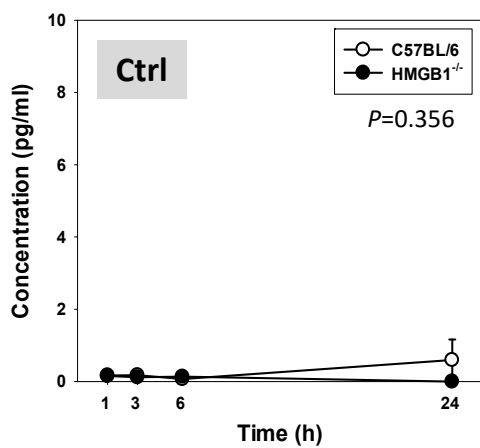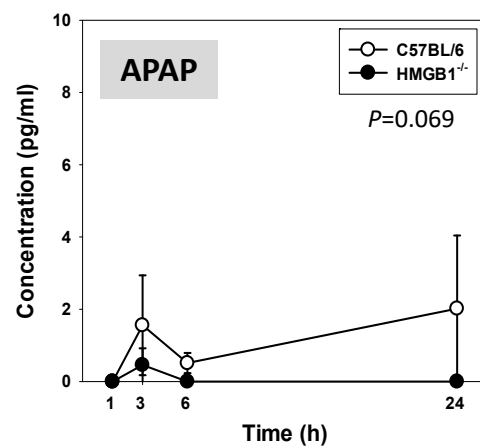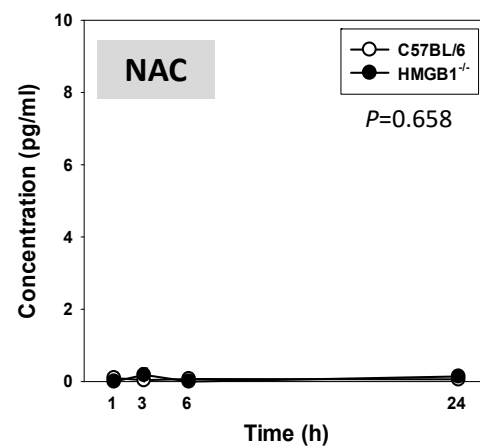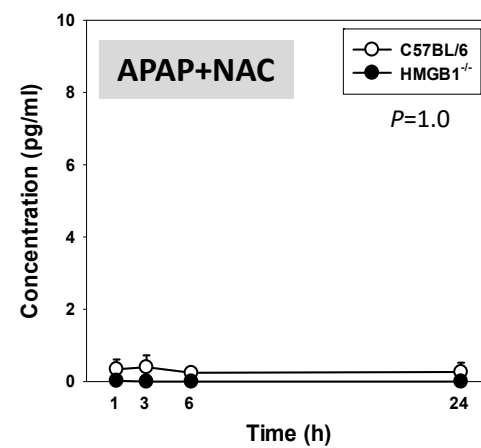

Suppl. Fig. 3

IL-1 $\alpha$

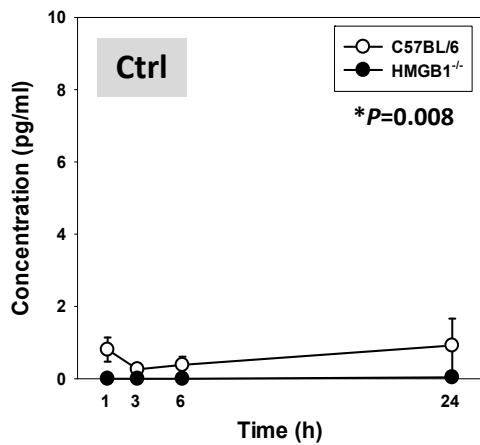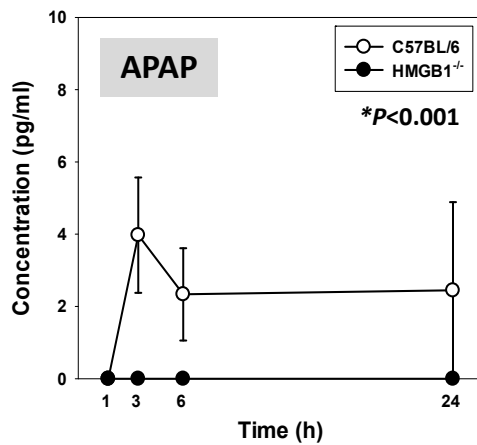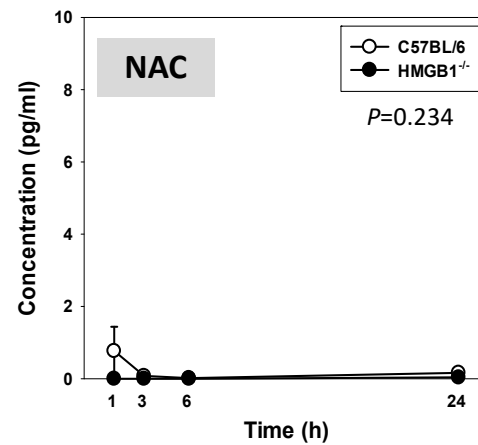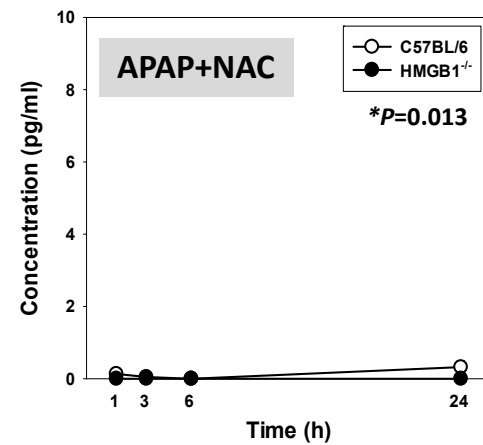

IL-1 $\beta$

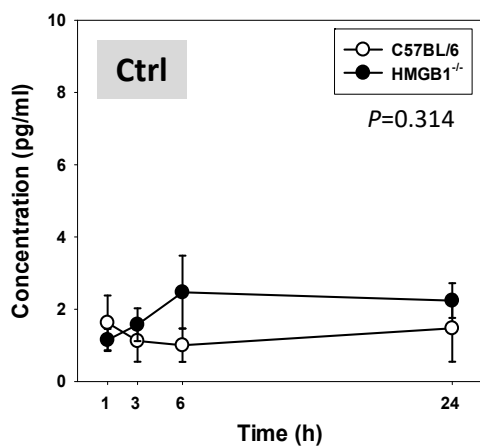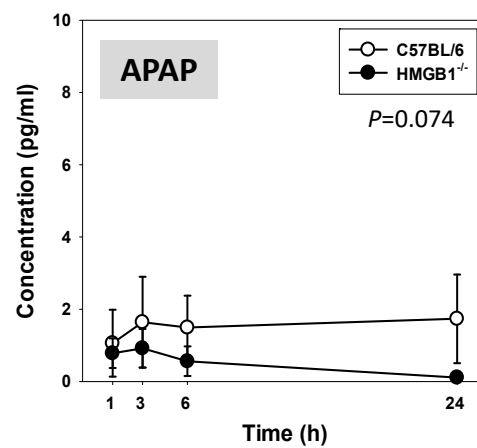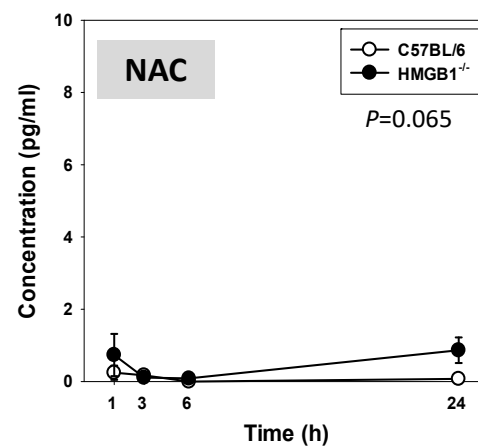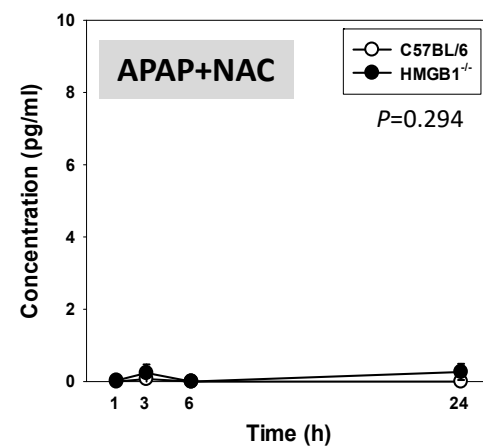



Suppl. Fig. 3

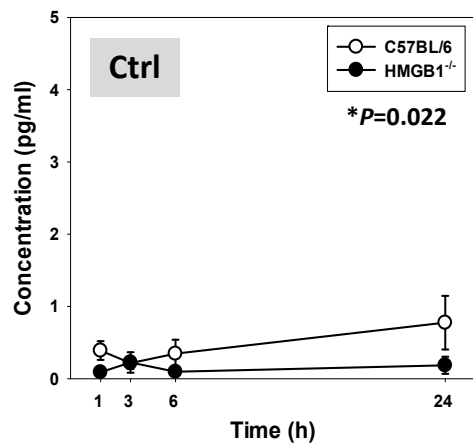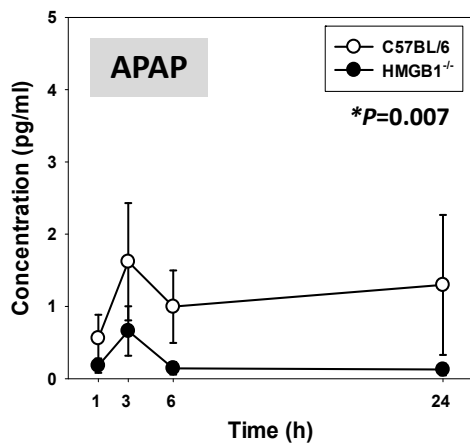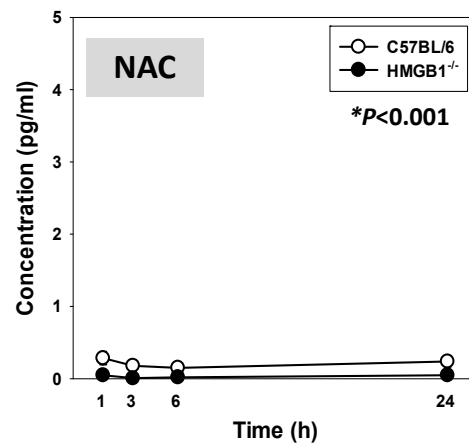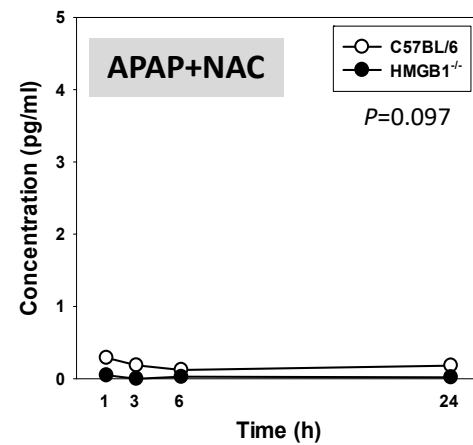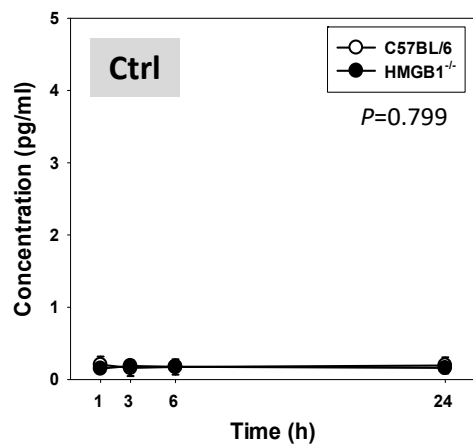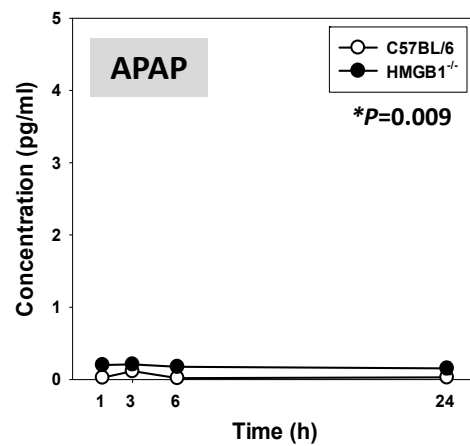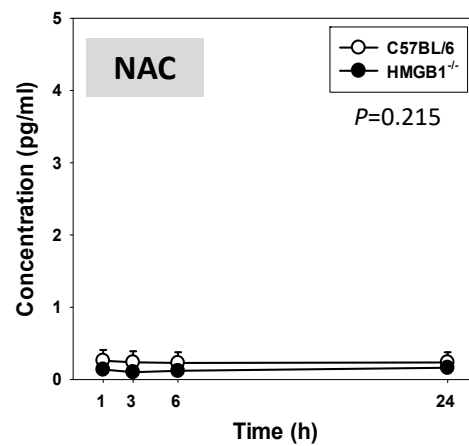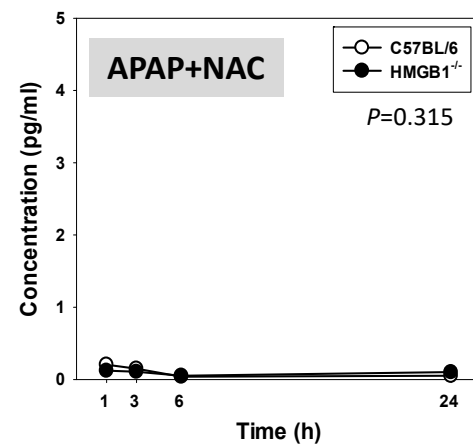

Suppl. Fig. 3

IL-5

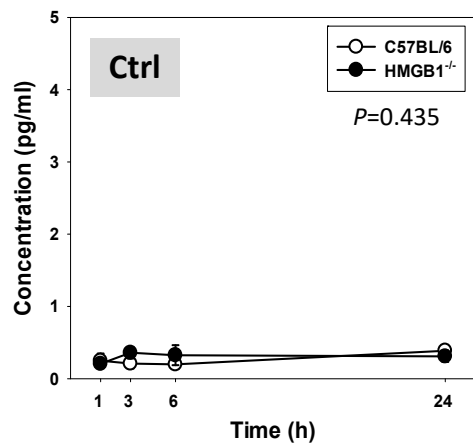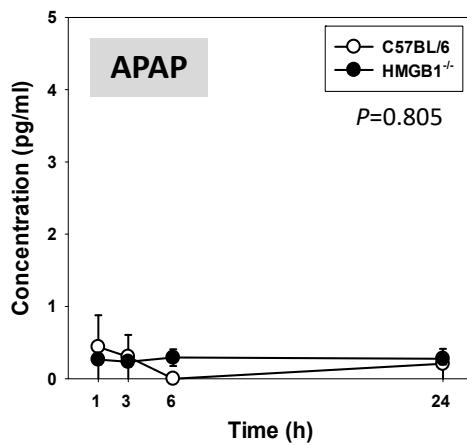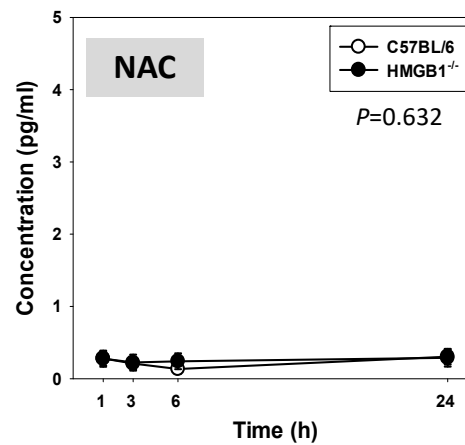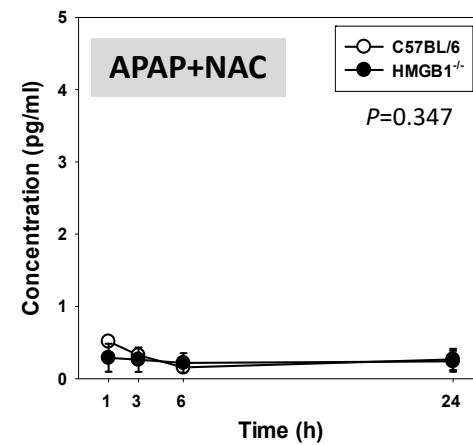

IL-6

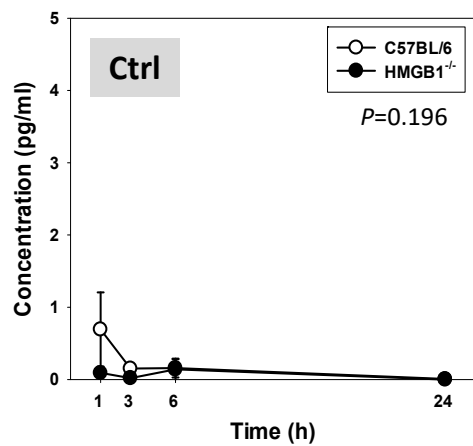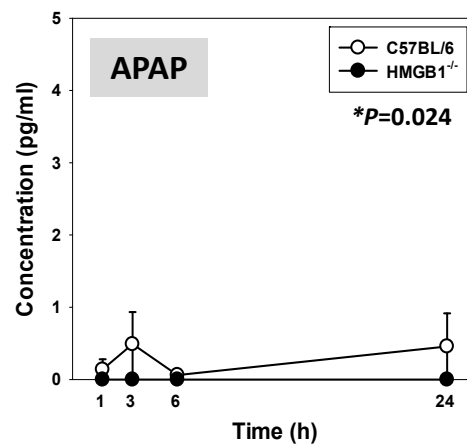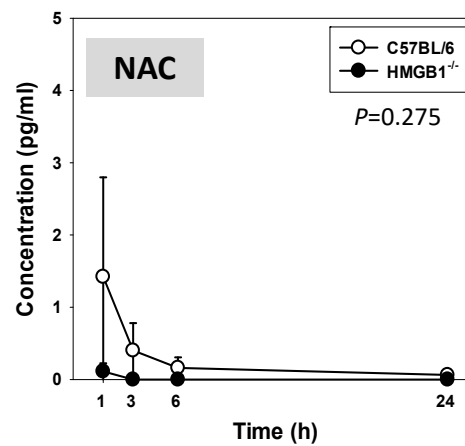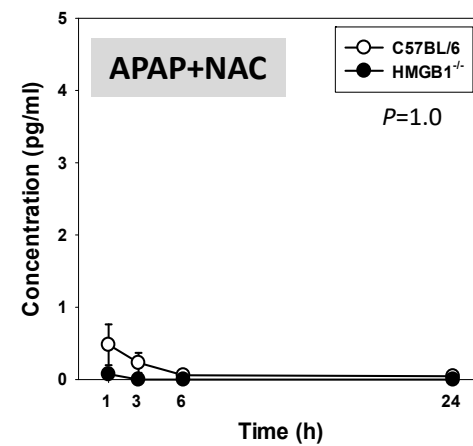

Suppl. Fig. 3

IL-10

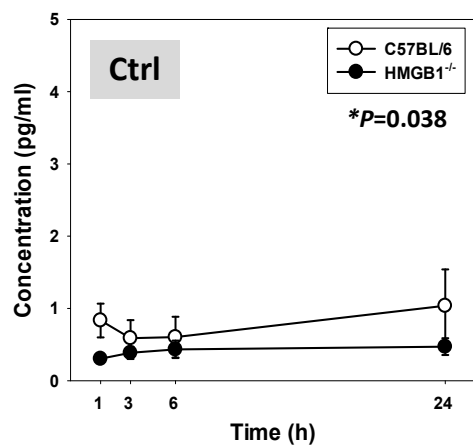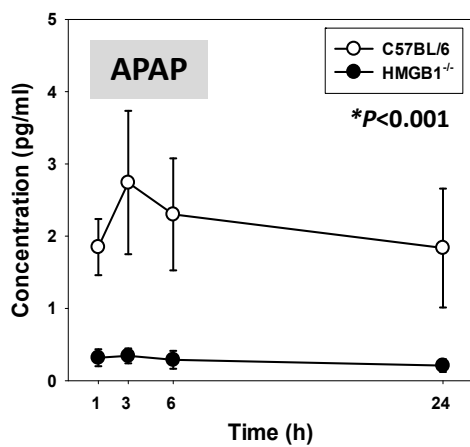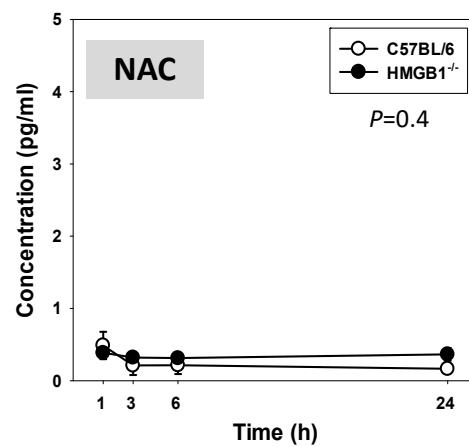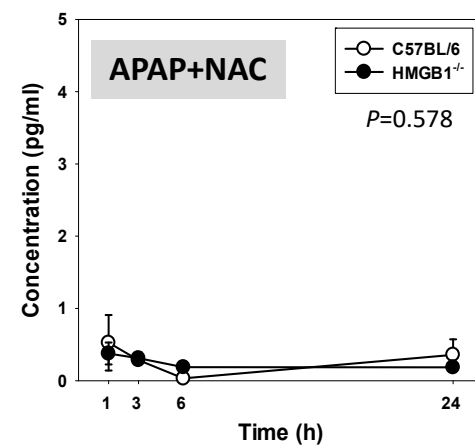

IL-13

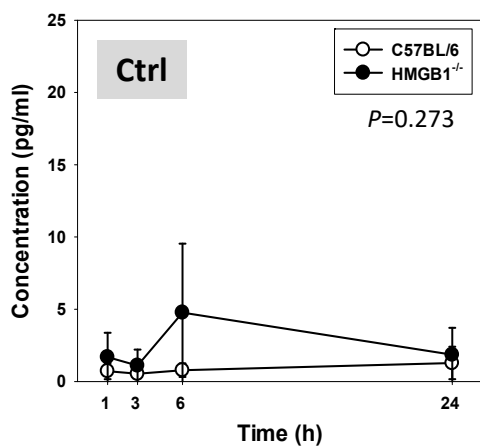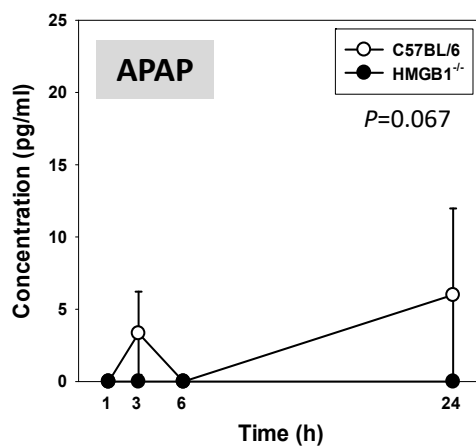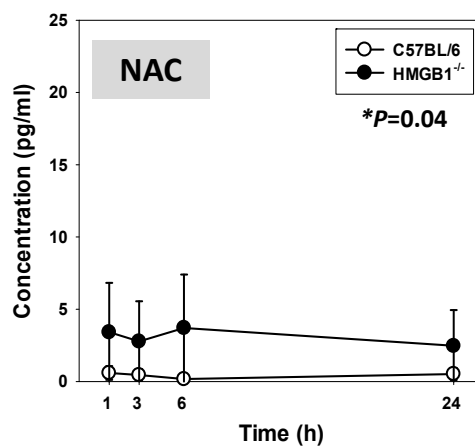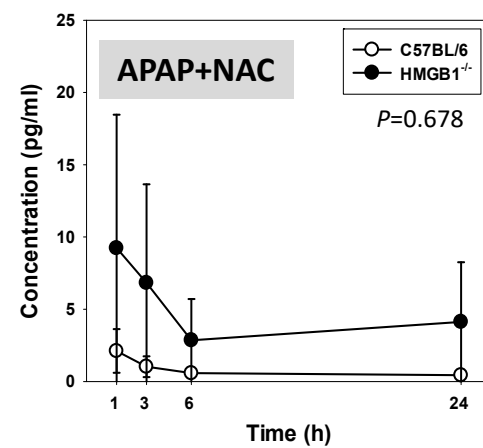

Suppl. Fig. 3

IL-12p40

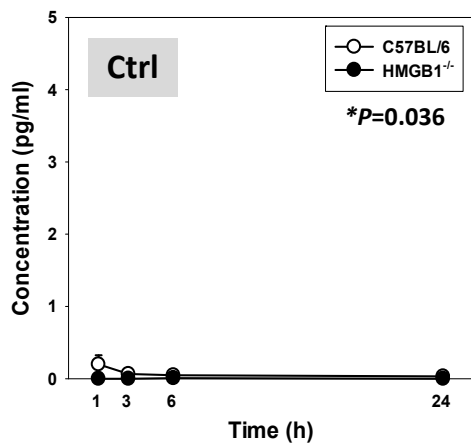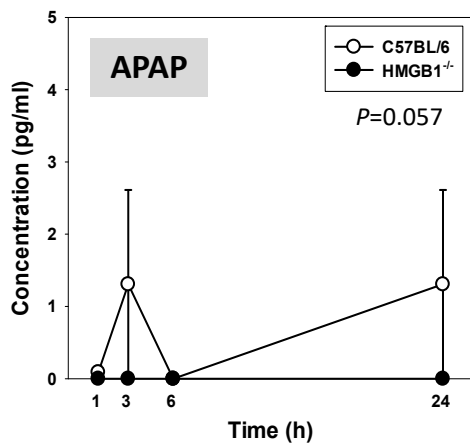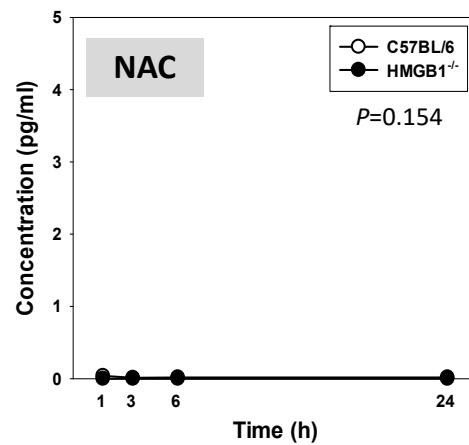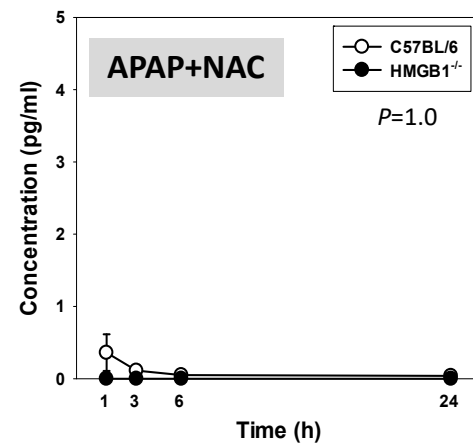

IL-12p70

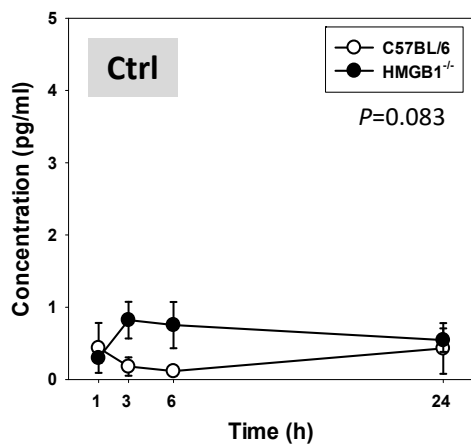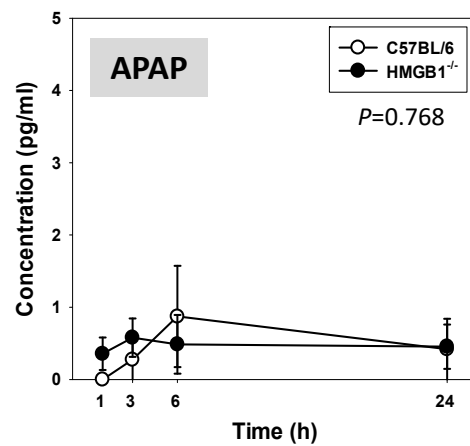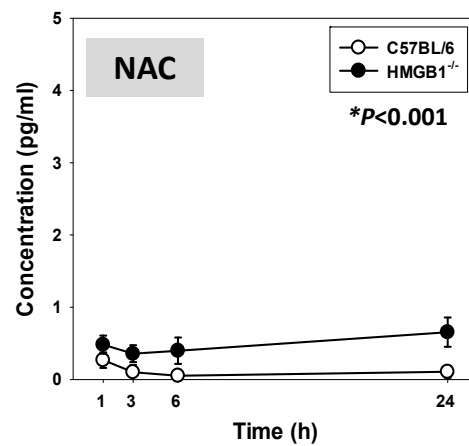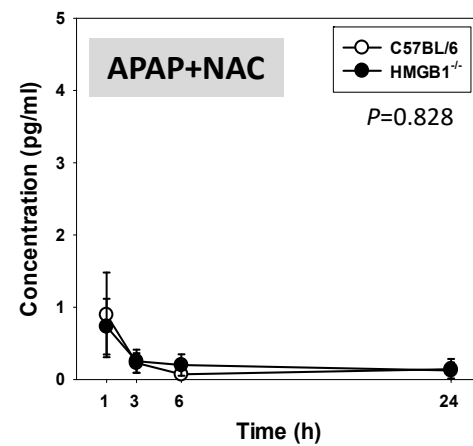

### IL-17A

Suppl. Fig. 3

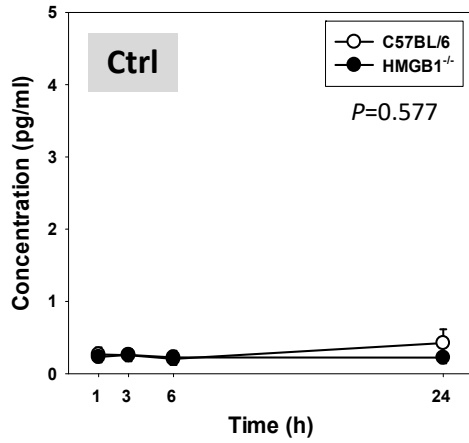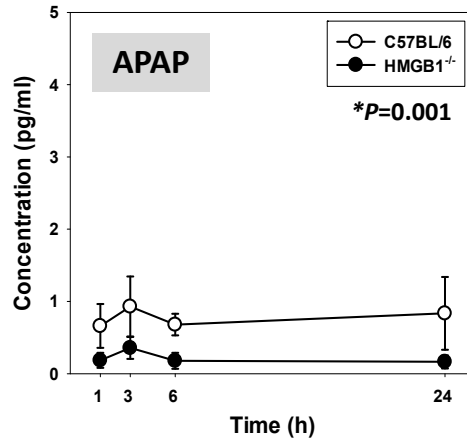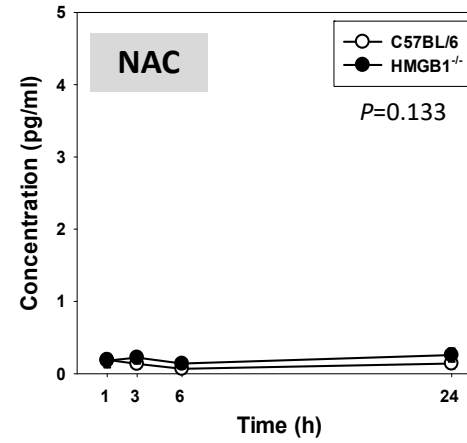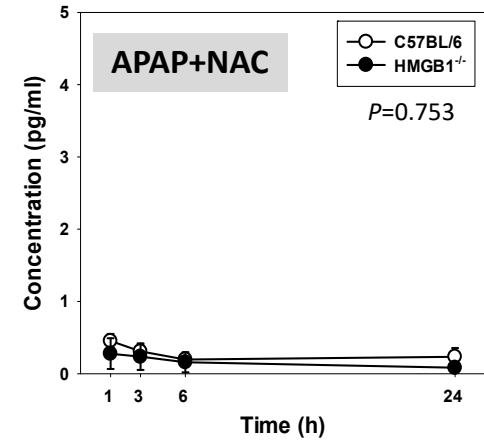

### IP-10

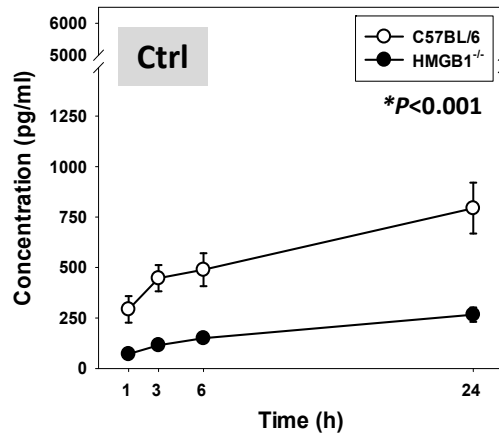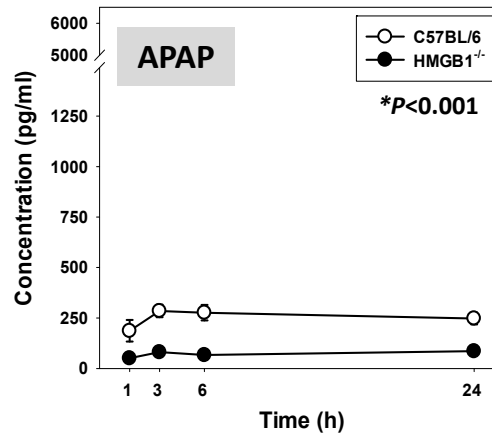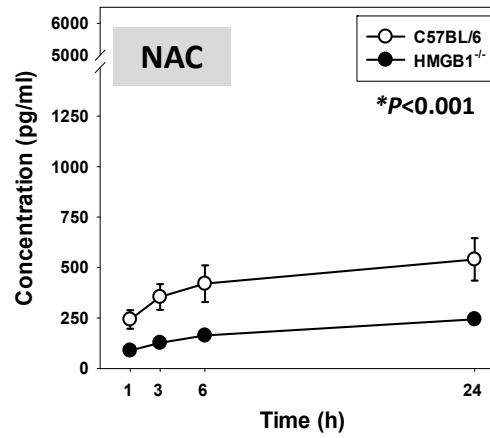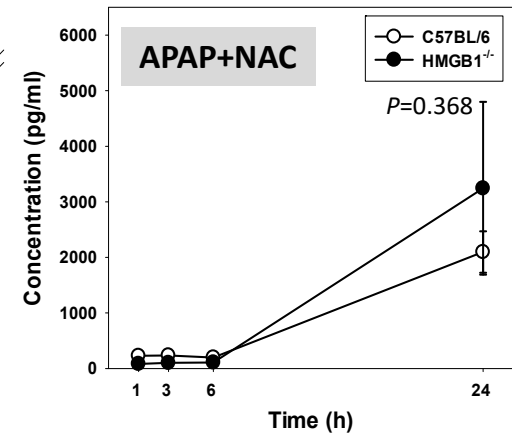

Suppl. Fig. 3

KC

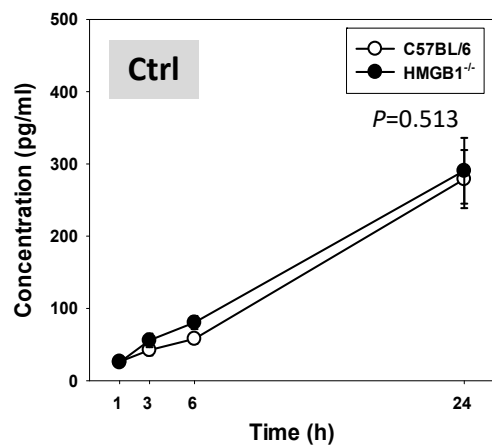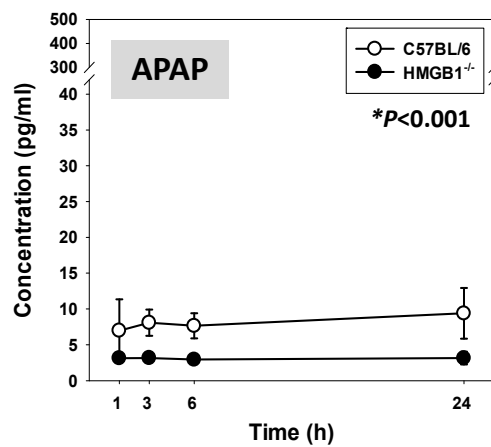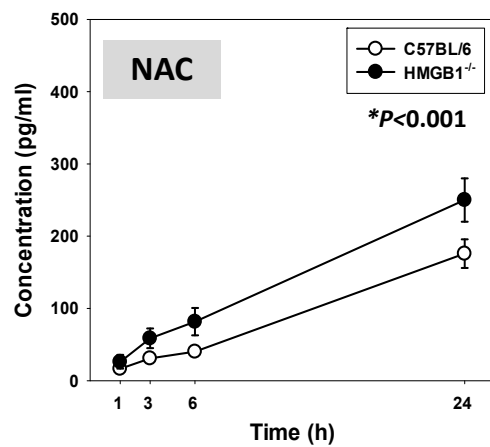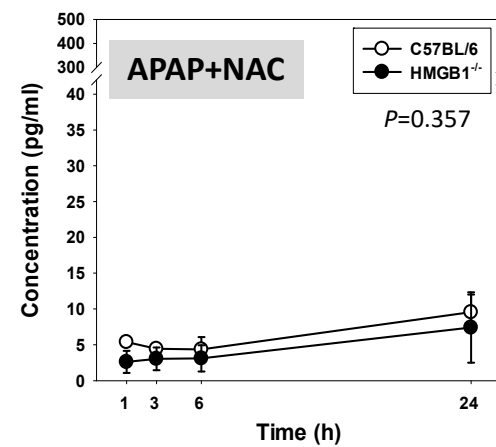

MCP-1

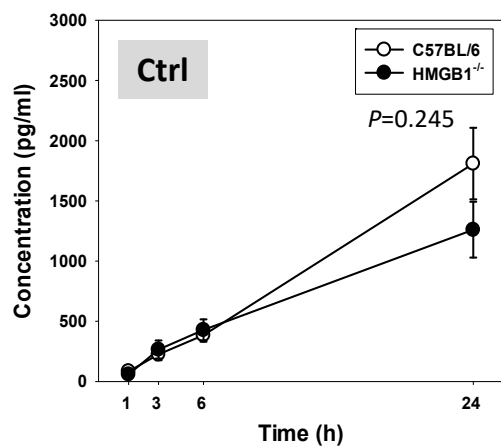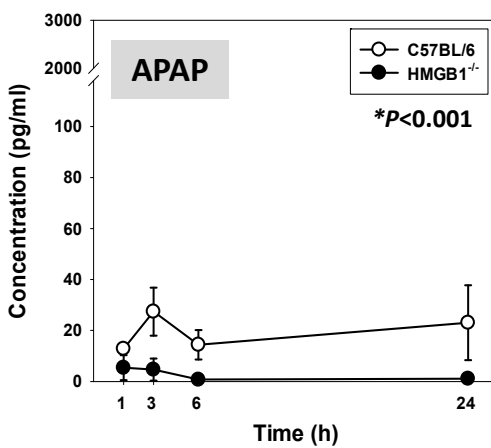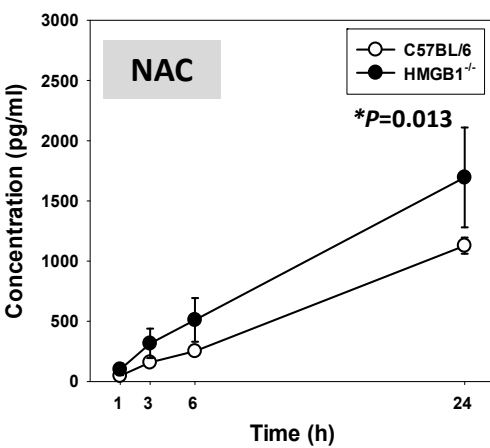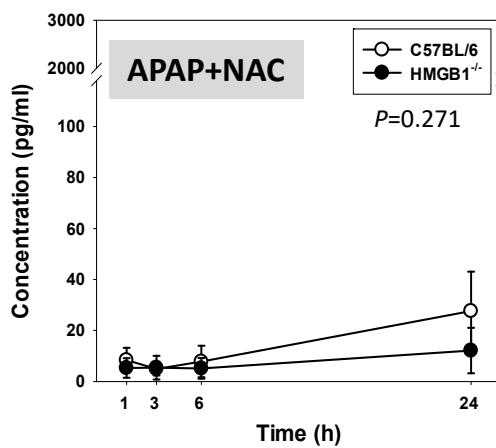

Suppl. Fig. 3

MIG

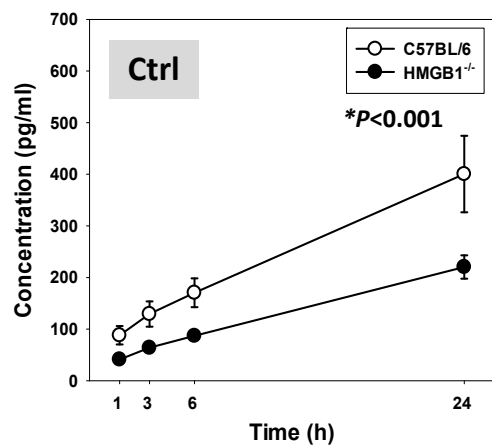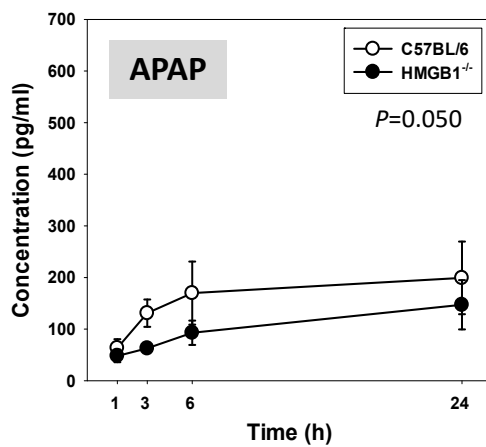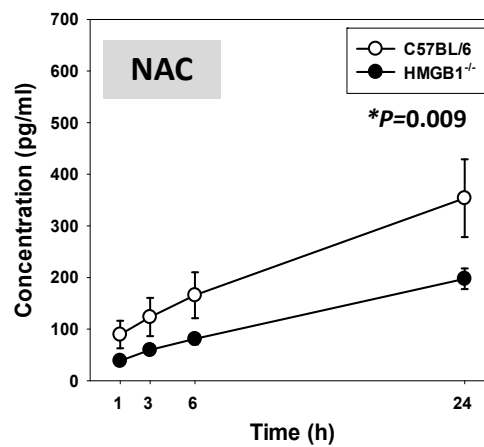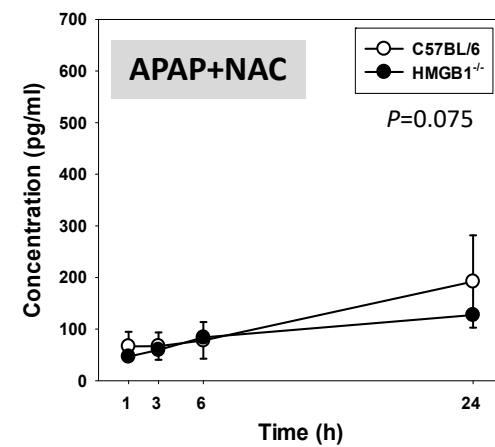

MIP-1 $\alpha$

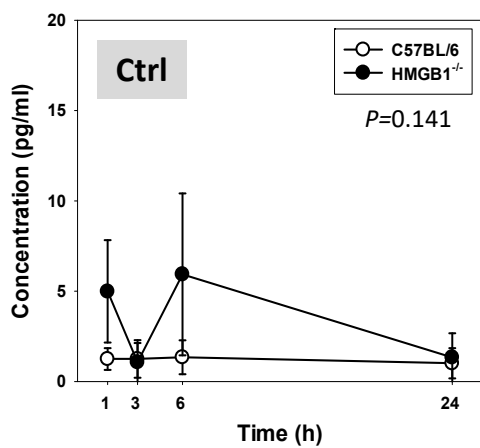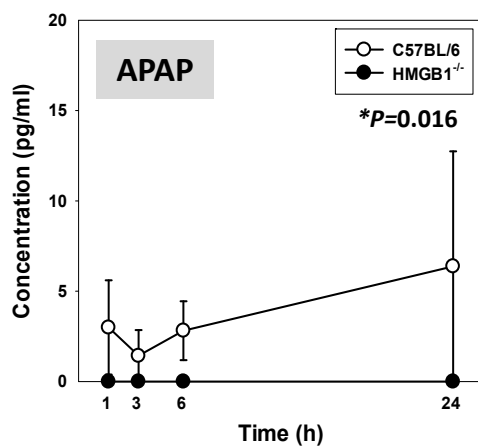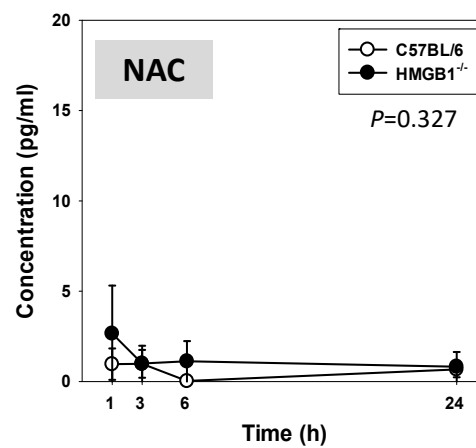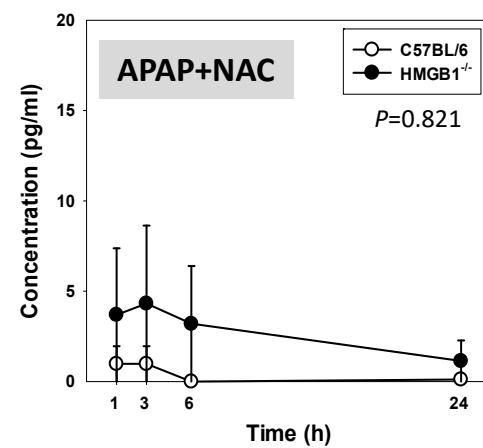

Suppl. Fig. 3

TNF- $\alpha$

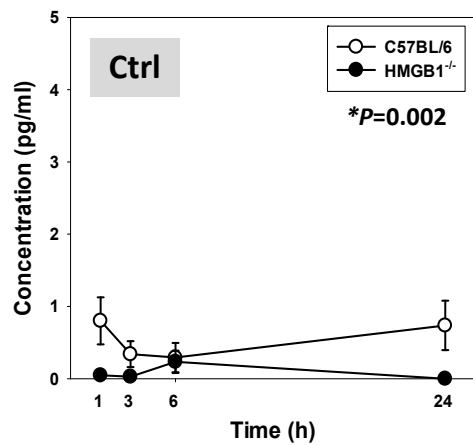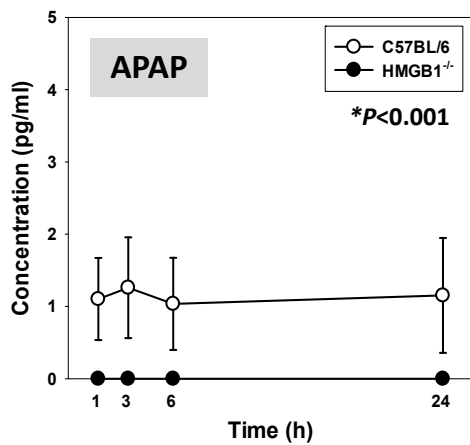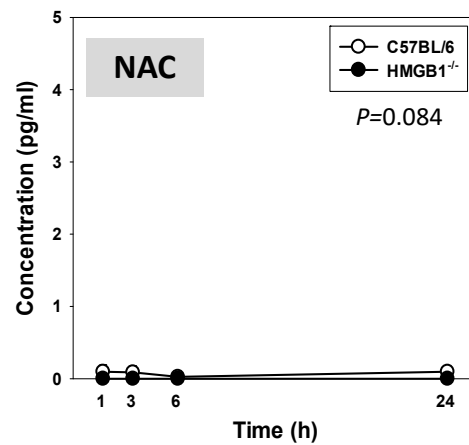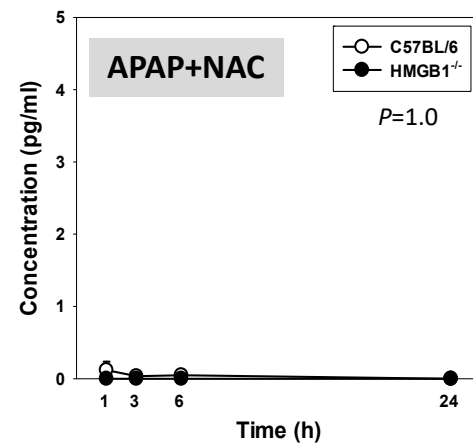

VEGF

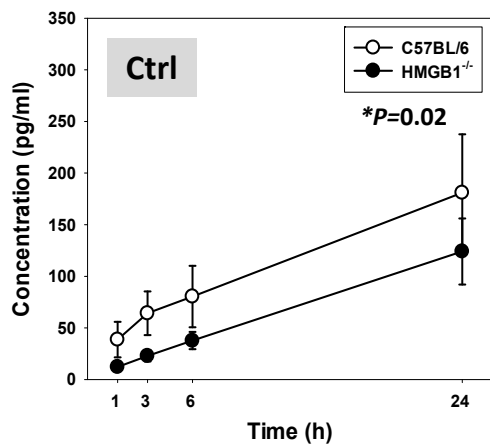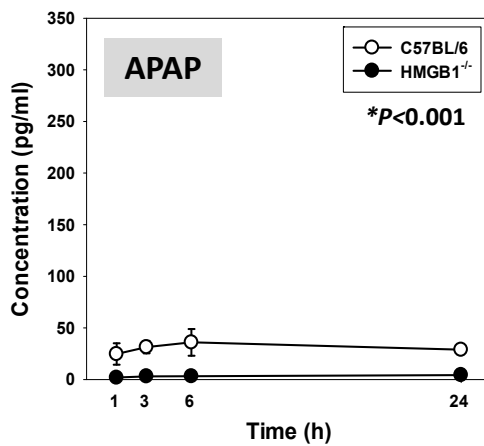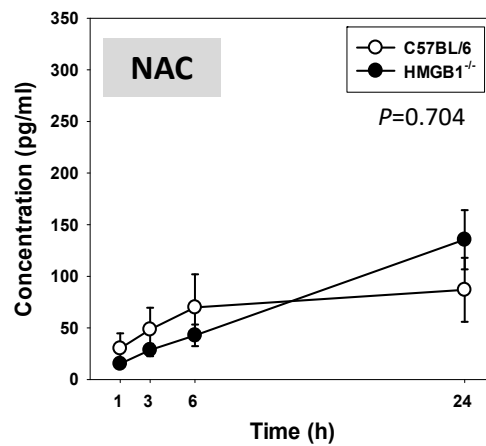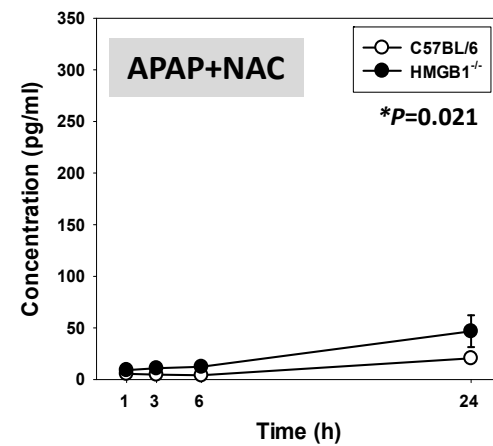



Suppl. Fig. 3

HMGB1

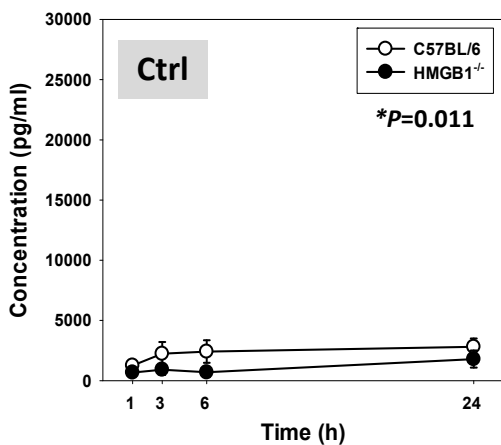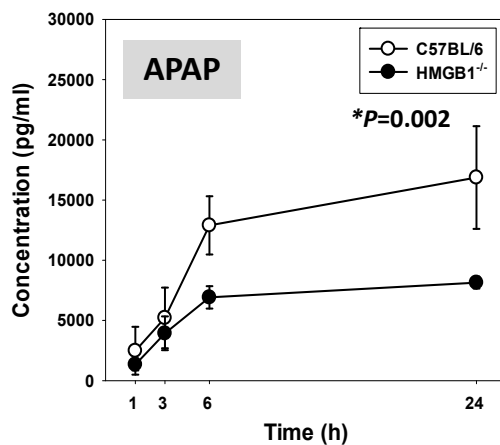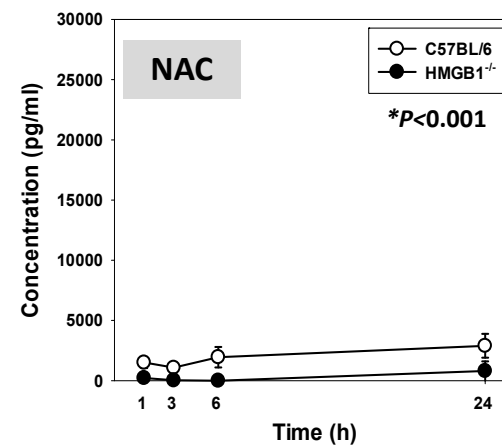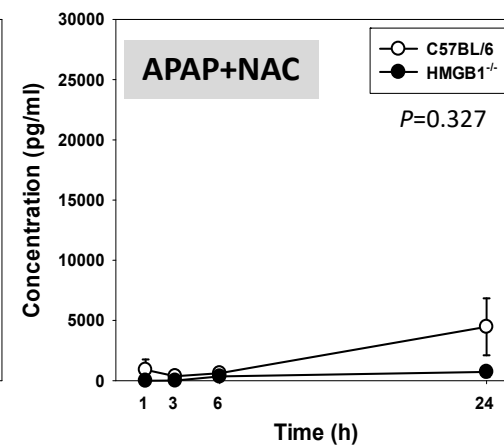

NO<sub>2</sub><sup>-</sup>/NO<sub>3</sub><sup>-</sup>

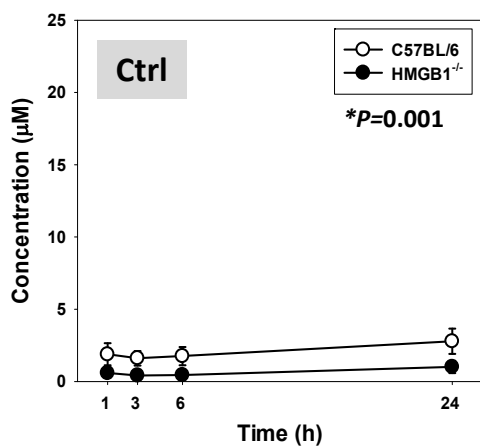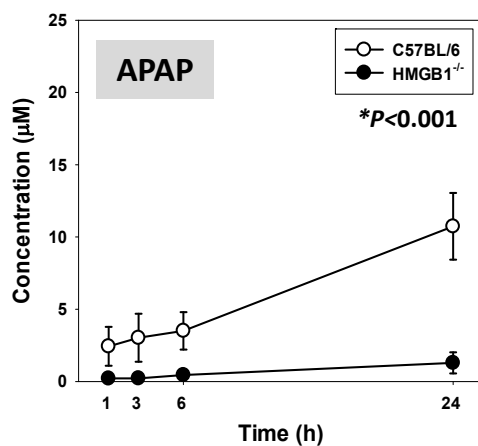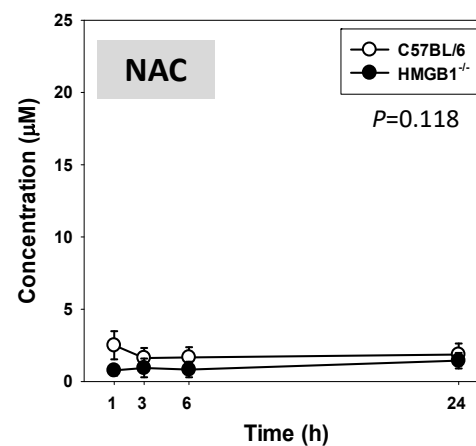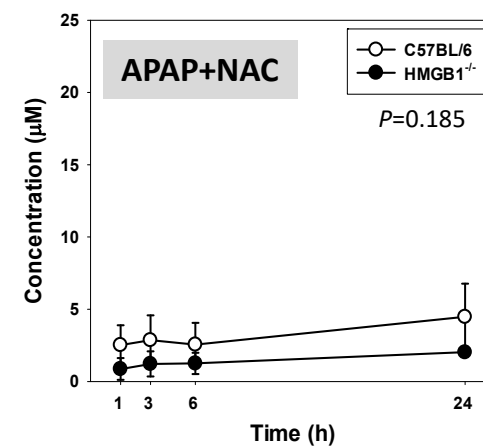

Supplement: 41598_2019_42564_MOESM1_ESM.pdf [file 41598_2019_42564_MOESM1_ESM.pdf]
