# Supplementary material for: HMGB1 is a Central Driver of Dynamic Pro-inflammatory Networks in Pediatric Acute Liver Failure induced by Acetaminophen
Source: PubMed Central journal article supplement (PMC6461628; doi:10.1038/s41598-019-42564-5), 2019-04-12
Supplement: 41598_2019_42564_MOESM2_ESM.pdf [file 41598_2019_42564_MOESM2_ESM.pdf]

Data for Comp Analysis incl. AUC

Analysis

|        | pg/ml          | Plasma        | Plasma               | Plasma              | Plasma               | Plasma      | Plasma      | Plasma      | Plasma      |
|--------|----------------|---------------|----------------------|---------------------|----------------------|-------------|-------------|-------------|-------------|
| Plasma | Time Point [h] | Plasma GM-CSF | Plasma IFN- $\gamma$ | Plasma IL-1 $\beta$ | Plasma IL-1 $\alpha$ | Plasma IL-2 | Plasma IL-4 | Plasma IL-5 | Plasma IL-6 |
| WT-1   | h0             | 33.10         | 0.00                 | 0.00                | 0.00                 | 0.00        | 2.54        | 0.00        | 0.89        |
| WT-1   | h1             | 0.00          | 0.00                 | 0.00                | 0.00                 | 0.00        | 2.27        | 1.43        | 8289.65     |
| WT-1   | h4             | 80.68         | 18.99                | 0.00                | 49.70                | 0.00        | 2.50        | 46.60       | 10565.46    |
| WT-1   | h6             | 86.52         | 2220.65              | 15.70               | 61.74                | 4.41        | 2.04        | 90.40       | 10000.00    |
| WT-1   | h12            | 24.94         | 238.43               | 14.89               | 0.00                 | 0.00        | 0.00        | 66.93       | 15521.46    |
| WT-1   | h24            | 0.00          | 164.25               | 2.37                | 0.00                 | 4.32        | 2.06        | 25.17       | 9970.00     |
| WT-1   | h48            | 13.59         | 0.00                 | 0.00                | 0.00                 | 0.00        | 0.00        | 0.00        | 43.38       |
| WT-2   | h0             | 80.68         | 0.00                 | 53.05               | 0.00                 | 0.00        | 2.24        | 0.00        | 0.04        |
| WT-2   | h1             | 76.48         | 0.00                 | 0.00                | 0.00                 | 0.00        | 3.33        | 8.76        | 10441.23    |
| WT-2   | h4             | 42.42         | 33.15                | 0.00                | 68.61                | 0.00        | 2.35        | 43.29       | 10450.06    |
| WT-2   | h6             | 99.63         | 2100.74              | 9.60                | 34.20                | 5.32        | 1.92        | 57.68       | 10000.00    |
| WT-2   | h12            | 12.80         | 107.85               | 13.09               | 0.00                 | 0.00        | 0.00        | 35.16       | 14591.52    |
| WT-2   | h24            | 0.00          | 0.00                 | 1.34                | 0.00                 | 4.24        | 1.81        | 0.00        | 3.04        |
| WT-2   | h48            | 5.67          | 0.00                 | 0.00                | 0.00                 | 0.00        | 0.00        | 0.00        | 12.22       |
| WT-3   | h0             | 19.21         | 0.00                 | 0.00                | 0.00                 | 0.00        | 2.31        | 0.00        | 7.03        |
| WT-3   | h1             | 49.91         | 0.00                 | 0.00                | 38.41                | 0.00        | 4.57        | 12.72       | 10054.96    |
| WT-3   | h4             | 90.25         | 56.33                | 0.00                | 99.47                | 0.00        | 2.52        | 30.83       | 10872.13    |
| WT-3   | h6             | 50.28         | 1162.62              | 56.85               | 49.85                | 0.00        | 0.00        | 100.96      | 17054.50    |
| WT-3   | h12            | 57.07         | 166.93               | 14.22               | 0.00                 | 0.00        | 0.00        | 42.96       | 15544.02    |
| WT-3   | h24            | 0.00          | 0.00                 | 0.00                | 0.00                 | 0.00        | 0.00        | 13.41       | 179.89      |
| WT-3   | h48            | 0.00          | 0.00                 | 0.00                | 0.00                 | 0.00        | 0.00        | 0.00        | 14.04       |
| WT-4   | h0             | 116.67        | 21.17                | 0.00                | 25.63                | 0.00        | 3.70        | 0.00        | 0.00        |
| WT-4   | h1             | 0.00          | 0.00                 | 0.00                | 14.11                | 0.00        | 3.13        | 18.80       | 9552.77     |
| WT-4   | h4             | 95.54         | 221.26               | 24.20               | 224.01               | 4.75        | 2.14        | 26.52       | 10000.00    |
| WT-4   | h6             | 83.41         | 856.11               | 22.51               | 36.73                | 0.00        | 0.00        | 161.13      | 17454.67    |
| WT-4   | h12            | 24.94         | 114.84               | 10.75               | 1.08                 | 0.00        | 0.00        | 31.20       | 13832.89    |

|      |     |        |        |       |        |      |      |       |          |
|------|-----|--------|--------|-------|--------|------|------|-------|----------|
| WT-4 | h24 | 0.00   | 0.00   | 0.00  | 0.00   | 0.00 | 0.00 | 13.99 | 174.93   |
| WT-4 | h48 | 0.00   | 0.00   | 0.00  | 0.00   | 0.00 | 0.00 | 0.00  | 58.84    |
| WT-5 | h0  | 0.00   | 0.00   | 1.40  | 0.00   | 2.14 | 0.98 | 0.46  | 0.68     |
| WT-5 | h1  | 0.00   | 0.00   | 2.58  | 0.00   | 4.32 | 1.92 | 1.83  | 4757.47  |
| WT-5 | h4  | 103.50 | 240.83 | 19.96 | 166.78 | 4.45 | 2.37 | 37.48 | 10000.00 |
| WT-5 | h6  | 0.00   | 0.00   | 0.00  | 0.00   | 0.00 | 0.00 | 33.92 | 40.41    |
| WT-5 | h12 | 0.00   | 179.72 | 4.05  | 16.48  | 0.00 | 0.00 | 15.98 | 12592.67 |
| WT-5 | h24 | 0.00   | 290.39 | 12.63 | 0.00   | 0.00 | 0.00 | 50.40 | 19139.06 |
| WT-5 | h48 | 0.00   | 0.00   | 0.00  | 0.00   | 0.00 | 0.00 | 4.00  | 2.47     |
| WT-6 | h1  | 0.00   | 0.00   | 1.71  | 0.00   | 4.37 | 1.93 | 0.00  | 10000.00 |
| WT-6 | h4  | 166.00 | 479.58 | 11.88 | 134.52 | 4.75 | 2.35 | 35.21 | 10000.00 |
| WT-6 | h6  | 0.00   | 875.02 | 13.77 | 65.65  | 0.00 | 0.00 | 59.25 | 16583.62 |
| WT-6 | h12 | 0.00   | 255.49 | 0.00  | 18.05  | 0.00 | 0.00 | 16.81 | 14192.02 |
| WT-6 | h24 | 0.00   | 105.44 | 2.51  | 0.00   | 0.00 | 1.64 | 28.95 | 10000.00 |
| WT-6 | h48 | 0.00   | 0.00   | 0.00  | 0.00   | 0.00 | 0.00 | 0.00  | 35.51    |

### Data for Comp Analysis DyNA with BL-CTRL

|          |        | pg/ml          | Plasma         | Plasma  | Plasma | Plasma | Plasma | Plasma | Plasma | Plasma |          |
|----------|--------|----------------|----------------|---------|--------|--------|--------|--------|--------|--------|----------|
| Analysis | Plasma | Time Point [h] | pGM-CSF        | pIFN-g  | pIL-1a | pIL-1b | pIL-2  | pIL-4  | pIL-5  | pIL-6  |          |
|          |        |                | P8             | OBC     | WT-1   | 0h     | 33.10  | 0.00   | 0.00   | 0.00   | 0.00     |
| P9       | OBC    | WT-2           | 0h             | 80.68   | 0.00   | 53.05  | 0.00   | 0.00   | 2.24   | 0.00   | 0.04     |
| P10      | OBC    | WT-3           | 0h             | 19.21   | 0.00   | 0.00   | 0.00   | 0.00   | 2.31   | 0.00   | 7.03     |
| P11      | OBC    | WT-4           | 0h             | 116.67  | 21.17  | 0.00   | 25.63  | 0.00   | 3.70   | 0.00   | 0.00     |
| P28      | OBC    | WT-5           | 0h             | 0.00    | 0.00   | 1.40   | 0.00   | 2.14   | 0.98   | 0.46   | 0.68     |
|          |        | Plasma         | Time Point [h] | pGM-CSF | pIFN-g | pIL-1a | pIL-1b | pIL-2  | pIL-4  | pIL-5  | pIL-6    |
| P1       | LPS    | WT-1           | 1h             | 0.00    | 0.00   | 0.00   | 0.00   | 0.00   | 2.27   | 1.43   | 8289.65  |
| P5       | LPS    | WT-1           | 4h             | 80.68   | 18.99  | 0.00   | 49.70  | 0.00   | 2.50   | 46.60  | 10565.46 |

|     |     |      |     |        |         |       |        |      |      |        |          |
|-----|-----|------|-----|--------|---------|-------|--------|------|------|--------|----------|
| P34 | LPS | WT-1 | 6h  | 86.52  | 2220.65 | 15.70 | 61.74  | 4.41 | 2.04 | 90.40  | 10000.00 |
| P40 | LPS | WT-1 | 12h | 24.94  | 238.43  | 14.89 | 0.00   | 0.00 | 0.00 | 66.93  | 15521.46 |
| P12 | LPS | WT-1 | 24h | 0.00   | 164.25  | 2.37  | 0.00   | 4.32 | 2.06 | 25.17  | 9970.00  |
| P20 | LPS | WT-1 | 48h | 13.59  | 0.00    | 0.00  | 0.00   | 0.00 | 0.00 | 0.00   | 43.38    |
| P2  | LPS | WT-2 | 1h  | 76.48  | 0.00    | 0.00  | 0.00   | 0.00 | 3.33 | 8.76   | 10441.23 |
| P6  | LPS | WT-2 | 4h  | 42.42  | 33.15   | 0.00  | 68.61  | 0.00 | 2.35 | 43.29  | 10450.06 |
| P35 | LPS | WT-2 | 6h  | 99.63  | 2100.74 | 9.60  | 34.20  | 5.32 | 1.92 | 57.68  | 10000.00 |
| P41 | LPS | WT-2 | 12h | 12.80  | 107.85  | 13.09 | 0.00   | 0.00 | 0.00 | 35.16  | 14591.52 |
| P13 | LPS | WT-2 | 24h | 0.00   | 0.00    | 1.34  | 0.00   | 4.24 | 1.81 | 0.00   | 3.04     |
| P21 | LPS | WT-2 | 48h | 5.67   | 0.00    | 0.00  | 0.00   | 0.00 | 0.00 | 0.00   | 12.22    |
| P3  | LPS | WT-3 | 1h  | 49.91  | 0.00    | 0.00  | 38.41  | 0.00 | 4.57 | 12.72  | 10054.96 |
| P7  | LPS | WT-3 | 4h  | 90.25  | 56.33   | 0.00  | 99.47  | 0.00 | 2.52 | 30.83  | 10872.13 |
| P36 | LPS | WT-3 | 6h  | 50.28  | 1162.62 | 56.85 | 49.85  | 0.00 | 0.00 | 100.96 | 17054.50 |
| P42 | LPS | WT-3 | 12h | 57.07  | 166.93  | 14.22 | 0.00   | 0.00 | 0.00 | 42.96  | 15544.02 |
| P14 | LPS | WT-3 | 24h | 0.00   | 0.00    | 0.00  | 0.00   | 0.00 | 0.00 | 13.41  | 179.89   |
| P22 | LPS | WT-3 | 48h | 0.00   | 0.00    | 0.00  | 0.00   | 0.00 | 0.00 | 0.00   | 14.04    |
| P4  | LPS | WT-4 | 1h  | 0.00   | 0.00    | 0.00  | 14.11  | 0.00 | 3.13 | 18.80  | 9552.77  |
| P31 | LPS | WT-4 | 4h  | 95.54  | 221.26  | 24.20 | 224.01 | 4.75 | 2.14 | 26.52  | 10000.00 |
| P37 | LPS | WT-4 | 6h  | 83.41  | 856.11  | 22.51 | 36.73  | 0.00 | 0.00 | 161.13 | 17454.67 |
| P43 | LPS | WT-4 | 12h | 24.94  | 114.84  | 10.75 | 1.08   | 0.00 | 0.00 | 31.20  | 13832.89 |
| P15 | LPS | WT-4 | 24h | 0.00   | 0.00    | 0.00  | 0.00   | 0.00 | 0.00 | 13.99  | 174.93   |
| P23 | LPS | WT-4 | 48h | 0.00   | 0.00    | 0.00  | 0.00   | 0.00 | 0.00 | 0.00   | 58.84    |
| P29 | LPS | WT-5 | 1h  | 0.00   | 0.00    | 2.58  | 0.00   | 4.32 | 1.92 | 1.83   | 4757.47  |
| P32 | LPS | WT-5 | 4h  | 103.50 | 240.83  | 19.96 | 166.78 | 4.45 | 2.37 | 37.48  | 10000.00 |
| P38 | LPS | WT-5 | 6h  | 0.00   | 0.00    | 0.00  | 0.00   | 0.00 | 0.00 | 33.92  | 40.41    |
| P44 | LPS | WT-5 | 12h | 0.00   | 179.72  | 4.05  | 16.48  | 0.00 | 0.00 | 15.98  | 12592.67 |
| P16 | LPS | WT-5 | 24h | 0.00   | 290.39  | 12.63 | 0.00   | 0.00 | 0.00 | 50.40  | 19139.06 |
| P24 | WT  | WT-5 | 48h | 0.00   | 0.00    | 0.00  | 0.00   | 0.00 | 0.00 | 4.00   | 2.47     |
| P30 | LPS | WT-6 | 1h  | 0.00   | 0.00    | 1.71  | 0.00   | 4.37 | 1.93 | 0.00   | 10000.00 |



|     |         |      |     |       |       |      |      |      |   |       |        |
|-----|---------|------|-----|-------|-------|------|------|------|---|-------|--------|
| P61 | TLR4 Kc | KO-4 | h6  | 22.68 | 0.88  | 5.23 | 0    | 0    | 0 | 19.21 | 906.64 |
| P63 | TLR4 Kc | KO-2 | h12 | 0     | 0     | 0    | 0    | 0    | 0 | 64.78 | 108.5  |
| P64 | TLR4 Kc | KO-3 | h12 | 0     | 13.72 | 0    | 0    | 0    | 0 | 0     | 214.31 |
| P65 | TLR4 Kc | KO-4 | h12 | 0     | 0     | 0    | 0    | 0    | 0 | 33.8  | 73.45  |
| P67 | TLR4 Kc | KO-2 | h24 | 52.72 | 0     | 0    | 5.07 | 0.88 | 0 | 45.23 | 0      |
| P68 | TLR4 Kc | KO-3 | h24 | 52.72 | 0     | 0    | 0    | 0    | 0 | 21.28 | 6.03   |
| P69 | TLR4 Kc | KO-4 | h24 | 0     | 0     | 0    | 0    | 0    | 0 | 21.28 | 0      |
| P71 | TLR4 Kc | KO-2 | h48 | 0     | 0     | 0    | 0    | 0    | 0 | 0     | 0      |
| P72 | TLR4 Kc | KO-3 | h48 | 0     | 0     | 0    | 0    | 0.43 | 0 | 0     | 0      |

#### Data for DyNA with CTRL-BL

| Mouse ID | Strain  | Plasma | Time Point [h] | pg/ml   | Plasma | Plasma | Plasma | Plasma | Plasma | Plasma | Plasma |
|----------|---------|--------|----------------|---------|--------|--------|--------|--------|--------|--------|--------|
|          |         |        |                | pGM-CSF | pIFN-g | pIL-1a | pIL-1b | pIL-2  | pIL-4  | pIL-5  | pIL-6  |
| P46      | TLR4 Kc | KO-1   | 0h             | 0.0     | 0.0    | 0.0    | 0.0    | 0.0    | 0.0    | 0.0    | 0.0    |
| P50      | TLR4 Kc | KO-2   | 0h             | 0       | 0      | 0      | 0      | 0      | 0      | 7.72   | 2.59   |
| P51      | TLR4 Kc | KO-3   | 0h             | 0       | 0      | 0      | 0      | 0      | 0      | 0      | 11.65  |
| P56      | TLR4 Kc | KO-4   | 0h             | 0       | 0      | 0      | 5.55   | 0      | 0      | 16.66  | 4.02   |

| Mouse ID | Strain  | Plasma | Time Point [h] | pGM-CSF | pIFN-g | pIL-1a | pIL-1b | pIL-2 | pIL-4 | pIL-5 | pIL-6   |
|----------|---------|--------|----------------|---------|--------|--------|--------|-------|-------|-------|---------|
| P47      | TLR4 Kc | KO-1   | 1h             | 0.0     | 0.0    | 0.0    | 0.0    | 0.0   | 0.0   | 0.0   | 404.6   |
| P52      | TLR4 Kc | KO-1   | 4h             | 0       | 0.73   | 0      | 26.59  | 0     | 0     | 24.37 | 287.03  |
| P58      | TLR4 Kc | KO-1   | 6h             | 0       | 0      | 0      | 0      | 0     | 0     | 9.45  | 1022.59 |
| P62      | TLR4 Kc | KO-1   | 12h            | 0       | 0      | 0      | 0      | 0     | 0     | 15.98 | 103.48  |
| P66      | TLR4 Kc | KO-1   | 24h            | 0       | 0      | 0      | 0      | 0     | 0     | 14.64 | 0       |
| P70      | TLR4 Kc | KO-1   | 48h            | 0       | 0      | 0      | 0      | 0.97  | 0     | 1.05  | 0       |

|     |         |      |    |   |   |      |   |      |      |      |         |
|-----|---------|------|----|---|---|------|---|------|------|------|---------|
| P48 | TLR4 Kc | KO-2 | 1h | 0 | 0 | 0.99 | 0 | 4.24 | 1.92 | 1.53 | 1861.13 |
|-----|---------|------|----|---|---|------|---|------|------|------|---------|

|     |         |      |     |       |       |      |      |      |      |       |         |
|-----|---------|------|-----|-------|-------|------|------|------|------|-------|---------|
| P49 | TLR4 Kc | KO-3 | 1h  | 0     | 0     | 1.46 | 0    | 4.07 | 1.77 | 0.91  | 3359.38 |
| P57 | TLR4 Kc | KO-4 | 1h  | 0     | 0     | 0    | 0    | 0    | 0    | 0     | 2352.84 |
| P53 | TLR4 Kc | KO-2 | 4h  | 0     | 0     | 0    | 0    | 0    | 0    | 6.46  | 159.55  |
| P54 | TLR4 Kc | KO-3 | 4h  | 13.62 | 0     | 0    | 0    | 0    | 0    | 0     | 1.62    |
| P55 | TLR4 Kc | KO-4 | 4h  | 0     | 0     | 0    | 0    | 0    | 0    | 1.77  | 1070.69 |
| P59 | TLR4 Kc | KO-2 | 6h  | 0     | 3.06  | 0    | 0    | 0    | 0    | 1.57  | 693.57  |
| P60 | TLR4 Kc | KO-3 | 6h  | 0     | 0     | 0    | 0    | 0    | 0    | 0     | 0       |
| P61 | TLR4 Kc | KO-4 | 6h  | 22.68 | 0.88  | 5.23 | 0    | 0    | 0    | 19.21 | 906.64  |
| P63 | TLR4 Kc | KO-2 | 12h | 0     | 0     | 0    | 0    | 0    | 0    | 64.78 | 108.5   |
| P64 | TLR4 Kc | KO-3 | 12h | 0     | 13.72 | 0    | 0    | 0    | 0    | 0     | 214.31  |
| P65 | TLR4 Kc | KO-4 | 12h | 0     | 0     | 0    | 0    | 0    | 0    | 33.8  | 73.45   |
| P67 | TLR4 Kc | KO-2 | 24h | 52.72 | 0     | 0    | 5.07 | 0.88 | 0    | 45.23 | 0       |
| P68 | TLR4 Kc | KO-3 | 24h | 52.72 | 0     | 0    | 0    | 0    | 0    | 21.28 | 6.03    |
| P69 | TLR4 Kc | KO-4 | 24h | 0     | 0     | 0    | 0    | 0    | 0    | 21.28 | 0       |
| P71 | TLR4 Kc | KO-2 | 48h | 0     | 0     | 0    | 0    | 0    | 0    | 0     | 0       |
| P72 | TLR4 Kc | KO-3 | 48h | 0     | 0     | 0    | 0    | 0.43 | 0    | 0     | 0       |

| Plasma      | Plasma             | Plasma             | Plasma       | Plasma       | Plasma       | Plasma    | Plasma       | Plasma     | Plasma       | Plasma     |
|-------------|--------------------|--------------------|--------------|--------------|--------------|-----------|--------------|------------|--------------|------------|
| Plasma IL-1 | Plasma IL-12 (p40) | Plasma IL-12 (p70) | Plasma IL-13 | Plasma IL-15 | Plasma IP-10 | Plasma KC | Plasma MCP-1 | Plasma MIG | Plasma MIP-1 | Plasma TNF |
| 0.00        | 0.00               | 0.00               | 0.00         | 0.00         | 28.99        | 180.20    | 0.00         | 26.23      | 47.21        | 2.86       |
| 617.84      | 0.00               | 0.00               | 0.00         | 0.00         | 375.42       | 12199.00  | 873.54       | 308.86     | 239.16       | 203.15     |
| 694.48      | 974.96             | 0.00               | 0.00         | 0.00         | 3558.15      | 11711.34  | 17191.19     | 9717.53    | 3992.70      | 129.28     |
| 350.22      | 829.79             | 53.65              | 0.00         | 11.20        | 2520.78      | 10000.00  | 10000.00     | 14926.90   | 1762.42      | 146.43     |
| 202.29      | 83.78              | 11.64              | 0.00         | 38.56        | 2564.92      | 10100.61  | 4303.74      | 15530.90   | 212.37       | 25.92      |
| 401.94      | 8.96               | 9.40               | 0.00         | 15.35        | 1904.37      | 10000.00  | 8199.87      | 19431.37   | 275.35       | 46.01      |
| 32.77       | 0.00               | 0.00               | 0.00         | 0.16         | 546.85       | 2878.21   | 444.08       | 1864.35    | 24.46        | 0.00       |

|         |        |       |      |       |         |          |          |          |         |        |
|---------|--------|-------|------|-------|---------|----------|----------|----------|---------|--------|
| 0.00    | 0.00   | 0.00  | 0.00 | 0.00  | 44.93   | 318.72   | 13.27    | 23.67    | 0.00    | 2.74   |
| 1653.71 | 0.00   | 37.41 | 0.00 | 2.30  | 857.98  | 12012.86 | 6598.28  | 101.19   | 2773.06 | 942.93 |
| 508.57  | 671.90 | 0.00  | 0.00 | 0.00  | 4450.40 | 11434.99 | 17191.19 | 10827.98 | 2542.95 | 80.40  |
| 218.11  | 467.22 | 36.20 | 0.00 | 9.61  | 2336.88 | 10000.00 | 10000.00 | 12097.17 | 1406.55 | 87.66  |
| 292.69  | 43.99  | 11.42 | 0.00 | 31.27 | 1660.80 | 10988.10 | 3676.67  | 15478.09 | 138.52  | 23.34  |
| 0.00    | 0.00   | 35.13 | 0.00 | 0.00  | 202.74  | 256.64   | 0.00     | 1179.60  | 0.00    | 0.00   |
| 15.79   | 0.00   | 0.00  | 0.00 | 0.11  | 318.49  | 480.99   | 122.27   | 690.32   | 52.76   | 0.00   |

|         |         |       |      |       |         |          |          |          |         |        |
|---------|---------|-------|------|-------|---------|----------|----------|----------|---------|--------|
| 0.00    | 0.00    | 0.00  | 0.00 | 0.00  | 50.89   | 345.61   | 0.00     | 49.05    | 0.00    | 2.74   |
| 1379.79 | 0.00    | 90.33 | 0.00 | 10.46 | 778.45  | 7122.80  | 6822.84  | 37.98    | 2652.74 | 624.63 |
| 466.15  | 1181.45 | 32.54 | 0.00 | 3.20  | 6373.62 | 12074.42 | 17191.19 | 8942.86  | 5577.30 | 89.74  |
| 379.24  | 301.45  | 21.61 | 0.00 | 25.58 | 4386.00 | 11718.72 | 10000.00 | 17930.85 | 957.24  | 70.91  |
| 272.56  | 71.75   | 16.44 | 0.00 | 31.19 | 2140.49 | 11130.69 | 4057.27  | 16490.13 | 145.88  | 23.34  |
| 218.84  | 0.00    | 8.54  | 0.00 | 0.00  | 971.30  | 2324.59  | 550.76   | 8020.03  | 0.00    | 7.02   |
| 38.24   | 0.00    | 4.52  | 0.00 | 0.54  | 606.26  | 2113.18  | 290.68   | 1558.66  | 16.05   | 0.00   |

|         |        |       |      |       |          |          |          |          |         |        |
|---------|--------|-------|------|-------|----------|----------|----------|----------|---------|--------|
| 0.00    | 0.00   | 30.33 | 0.00 | 0.09  | 37.39    | 150.71   | 18.93    | 64.62    | 92.31   | 4.14   |
| 1724.09 | 0.00   | 20.47 | 0.00 | 0.00  | 576.01   | 11323.56 | 5934.19  | 38.34    | 2189.76 | 771.81 |
| 570.51  | 756.61 | 90.39 | 0.00 | 5.58  | 10000.00 | 10000.00 | 10000.00 | 22722.98 | 3893.09 | 187.89 |
| 492.79  | 258.90 | 20.75 | 0.00 | 7.10  | 6958.22  | 11510.34 | 10000.00 | 15390.33 | 739.73  | 84.69  |
| 339.20  | 43.99  | 9.88  | 0.00 | 22.12 | 2083.05  | 10278.78 | 3499.14  | 17320.60 | 162.74  | 24.77  |

|        |      |      |      |      |         |         |         |         |       |      |
|--------|------|------|------|------|---------|---------|---------|---------|-------|------|
| 298.04 | 0.00 | 8.99 | 0.00 | 0.00 | 782.67  | 3636.04 | 1013.10 | 4423.07 | 60.12 | 1.48 |
| 100.30 | 0.00 | 0.00 | 0.00 | 0.38 | 1260.05 | 3094.63 | 604.20  | 2573.29 | 29.03 | 2.31 |

|         |        |       |      |       |         |          |          |          |         |         |
|---------|--------|-------|------|-------|---------|----------|----------|----------|---------|---------|
| 0.48    | 0.43   | 0.00  | 0.00 | 0.00  | 14.66   | 154.78   | 0.00     | 64.99    | 0.00    | 0.80    |
| 2060.43 | 0.00   | 0.00  | 0.00 | 0.00  | 386.99  | 10000.00 | 3387.63  | 220.43   | 1117.40 | 1054.89 |
| 939.29  | 465.79 | 65.56 | 0.00 | 3.81  | 3380.82 | 10000.00 | 10000.00 | 28083.22 | 5125.67 | 238.64  |
| 30.26   | 0.00   | 8.99  | 0.00 | 0.00  | 499.61  | 440.95   | 146.26   | 3237.19  | 32.60   | 0.00    |
| 79.09   | 89.73  | 0.00  | 0.00 | 19.47 | 3139.25 | 13196.91 | 10000.00 | 16808.41 | 197.25  | 17.99   |
| 450.52  | 85.42  | 8.54  | 0.00 | 54.54 | 3165.83 | 12470.48 | 2746.35  | 15628.55 | 192.74  | 47.93   |
| 2.85    | 0.00   | 6.10  | 0.00 | 1.23  | 256.61  | 262.12   | 65.03    | 505.66   | 0.00    | 0.00    |

|               |              |             |             |              |                |                 |                |                 |               |              |
|---------------|--------------|-------------|-------------|--------------|----------------|-----------------|----------------|-----------------|---------------|--------------|
| 3332.31       | 0.56         | 0.00        | 0.00        | 0.00         | 676.53         | 10000.00        | 8548.08        | 134.50          | 2688.22       | 954.03       |
| 576.68        | 1005.73      | 52.75       | 0.00        | 11.20        | 10000.00       | 10000.00        | 10000.00       | 27767.26        | 4338.53       | 224.08       |
| 898.85        | 222.59       | 16.00       | 0.00        | 14.31        | 2659.89        | 10698.37        | 7428.42        | 16149.10        | 950.97        | 85.09        |
| 50.52         | 167.24       | 0.00        | 0.00        | 30.80        | 3729.02        | 13687.21        | 10000.00       | 15869.21        | 207.80        | 19.29        |
| <b>330.61</b> | <b>45.33</b> | <b>0.00</b> | <b>0.00</b> | <b>25.14</b> | <b>2037.63</b> | <b>10000.00</b> | <b>4061.64</b> | <b>14579.34</b> | <b>117.27</b> | <b>36.88</b> |
| <b>49.22</b>  | <b>0.00</b>  | <b>0.00</b> | <b>0.00</b> | <b>0.00</b>  | <b>687.32</b>  | <b>1310.55</b>  | <b>362.59</b>  | <b>1906.29</b>  | <b>7.97</b>   | <b>0.00</b>  |

| Plasma | Plasma       | Plasma       | Plasma | Plasma | Plasma | Plasma | Plasma | Plasma | Plasma  | Plasma |
|--------|--------------|--------------|--------|--------|--------|--------|--------|--------|---------|--------|
| pIL-10 | pIL-12 (p40) | pIL-12 (p70) | pIL-13 | pIL-17 | pIP-10 | pKC    | pMCP-1 | pMIG   | pMIP-1a | pTNFa  |
| 0.00   | 0.00         | 0.00         | 0.00   | 0.00   | 28.99  | 180.20 | 0.00   | 26.23  | 47.21   | 2.86   |
| 0.00   | 0.00         | 0.00         | 0.00   | 0.00   | 44.93  | 318.72 | 13.27  | 23.67  | 0.00    | 2.74   |
| 0.00   | 0.00         | 0.00         | 0.00   | 0.00   | 50.89  | 345.61 | 0.00   | 49.05  | 0.00    | 2.74   |
| 0.00   | 0.00         | 30.33        | 0.00   | 0.09   | 37.39  | 150.71 | 18.93  | 64.62  | 92.31   | 4.14   |
| 0.48   | 0.43         | 0.00         | 0.00   | 0.00   | 14.66  | 154.78 | 0.00   | 64.99  | 0.00    | 0.80   |

| pIL-10 | pIL-12 (p40) | pIL-12 (p70) | pIL-13 | pIL-17 | pIP-10  | pKC      | pMCP-1   | pMIG    | pMIP-1a | pTNFa  |
|--------|--------------|--------------|--------|--------|---------|----------|----------|---------|---------|--------|
| 617.84 | 0.00         | 0.00         | 0.00   | 0.00   | 375.42  | 12199.00 | 873.54   | 308.86  | 239.16  | 203.15 |
| 694.48 | 974.96       | 0.00         | 0.00   | 0.00   | 3558.15 | 11711.34 | 17191.19 | 9717.53 | 3992.70 | 129.28 |



|        |        |       |      |       |         |          |          |          |         |        |
|--------|--------|-------|------|-------|---------|----------|----------|----------|---------|--------|
| 350.22 | 829.79 | 53.65 | 0.00 | 11.20 | 2520.78 | 10000.00 | 10000.00 | 14926.90 | 1762.42 | 146.43 |
| 202.29 | 83.78  | 11.64 | 0.00 | 38.56 | 2564.92 | 10100.61 | 4303.74  | 15530.90 | 212.37  | 25.92  |
| 401.94 | 8.96   | 9.40  | 0.00 | 15.35 | 1904.37 | 10000.00 | 8199.87  | 19431.37 | 275.35  | 46.01  |
| 32.77  | 0.00   | 0.00  | 0.00 | 0.16  | 546.85  | 2878.21  | 444.08   | 1864.35  | 24.46   | 0.00   |

|         |        |       |      |       |         |          |          |          |         |        |
|---------|--------|-------|------|-------|---------|----------|----------|----------|---------|--------|
| 1653.71 | 0.00   | 37.41 | 0.00 | 2.30  | 857.98  | 12012.86 | 6598.28  | 101.19   | 2773.06 | 942.93 |
| 508.57  | 671.90 | 0.00  | 0.00 | 0.00  | 4450.40 | 11434.99 | 17191.19 | 10827.98 | 2542.95 | 80.40  |
| 218.11  | 467.22 | 36.20 | 0.00 | 9.61  | 2336.88 | 10000.00 | 10000.00 | 12097.17 | 1406.55 | 87.66  |
| 292.69  | 43.99  | 11.42 | 0.00 | 31.27 | 1660.80 | 10988.10 | 3676.67  | 15478.09 | 138.52  | 23.34  |
| 0.00    | 0.00   | 35.13 | 0.00 | 0.00  | 202.74  | 256.64   | 0.00     | 1179.60  | 0.00    | 0.00   |
| 15.79   | 0.00   | 0.00  | 0.00 | 0.11  | 318.49  | 480.99   | 122.27   | 690.32   | 52.76   | 0.00   |

|         |         |       |      |       |         |          |          |          |         |        |
|---------|---------|-------|------|-------|---------|----------|----------|----------|---------|--------|
| 1379.79 | 0.00    | 90.33 | 0.00 | 10.46 | 778.45  | 7122.80  | 6822.84  | 37.98    | 2652.74 | 624.63 |
| 466.15  | 1181.45 | 32.54 | 0.00 | 3.20  | 6373.62 | 12074.42 | 17191.19 | 8942.86  | 5577.30 | 89.74  |
| 379.24  | 301.45  | 21.61 | 0.00 | 25.58 | 4386.00 | 11718.72 | 10000.00 | 17930.85 | 957.24  | 70.91  |
| 272.56  | 71.75   | 16.44 | 0.00 | 31.19 | 2140.49 | 11130.69 | 4057.27  | 16490.13 | 145.88  | 23.34  |
| 218.84  | 0.00    | 8.54  | 0.00 | 0.00  | 971.30  | 2324.59  | 550.76   | 8020.03  | 0.00    | 7.02   |
| 38.24   | 0.00    | 4.52  | 0.00 | 0.54  | 606.26  | 2113.18  | 290.68   | 1558.66  | 16.05   | 0.00   |

|         |        |       |      |       |          |          |          |          |         |        |
|---------|--------|-------|------|-------|----------|----------|----------|----------|---------|--------|
| 1724.09 | 0.00   | 20.47 | 0.00 | 0.00  | 576.01   | 11323.56 | 5934.19  | 38.34    | 2189.76 | 771.81 |
| 570.51  | 756.61 | 90.39 | 0.00 | 5.58  | 10000.00 | 10000.00 | 10000.00 | 22722.98 | 3893.09 | 187.89 |
| 492.79  | 258.90 | 20.75 | 0.00 | 7.10  | 6958.22  | 11510.34 | 10000.00 | 15390.33 | 739.73  | 84.69  |
| 339.20  | 43.99  | 9.88  | 0.00 | 22.12 | 2083.05  | 10278.78 | 3499.14  | 17320.60 | 162.74  | 24.77  |
| 298.04  | 0.00   | 8.99  | 0.00 | 0.00  | 782.67   | 3636.04  | 1013.10  | 4423.07  | 60.12   | 1.48   |
| 100.30  | 0.00   | 0.00  | 0.00 | 0.38  | 1260.05  | 3094.63  | 604.20   | 2573.29  | 29.03   | 2.31   |

|         |        |       |      |       |         |          |          |          |         |         |
|---------|--------|-------|------|-------|---------|----------|----------|----------|---------|---------|
| 2060.43 | 0.00   | 0.00  | 0.00 | 0.00  | 386.99  | 10000.00 | 3387.63  | 220.43   | 1117.40 | 1054.89 |
| 939.29  | 465.79 | 65.56 | 0.00 | 3.81  | 3380.82 | 10000.00 | 10000.00 | 28083.22 | 5125.67 | 238.64  |
| 30.26   | 0.00   | 8.99  | 0.00 | 0.00  | 499.61  | 440.95   | 146.26   | 3237.19  | 32.60   | 0.00    |
| 79.09   | 89.73  | 0.00  | 0.00 | 19.47 | 3139.25 | 13196.91 | 10000.00 | 16808.41 | 197.25  | 17.99   |
| 450.52  | 85.42  | 8.54  | 0.00 | 54.54 | 3165.83 | 12470.48 | 2746.35  | 15628.55 | 192.74  | 47.93   |
| 2.85    | 0.00   | 6.10  | 0.00 | 1.23  | 256.61  | 262.12   | 65.03    | 505.66   | 0.00    | 0.00    |

|         |      |      |      |      |        |          |         |        |         |        |
|---------|------|------|------|------|--------|----------|---------|--------|---------|--------|
| 3332.31 | 0.56 | 0.00 | 0.00 | 0.00 | 676.53 | 10000.00 | 8548.08 | 134.50 | 2688.22 | 954.03 |
|---------|------|------|------|------|--------|----------|---------|--------|---------|--------|

|               |              |             |             |              |                |                 |                |                 |               |              |
|---------------|--------------|-------------|-------------|--------------|----------------|-----------------|----------------|-----------------|---------------|--------------|
| 576.68        | 1005.73      | 52.75       | 0.00        | 11.20        | 10000.00       | 10000.00        | 10000.00       | 27767.26        | 4338.53       | 224.08       |
| 898.85        | 222.59       | 16.00       | 0.00        | 14.31        | 2659.89        | 10698.37        | 7428.42        | 16149.10        | 950.97        | 85.09        |
| 50.52         | 167.24       | 0.00        | 0.00        | 30.80        | 3729.02        | 13687.21        | 10000.00       | 15869.21        | 207.80        | 19.29        |
| <b>330.61</b> | <b>45.33</b> | <b>0.00</b> | <b>0.00</b> | <b>25.14</b> | <b>2037.63</b> | <b>10000.00</b> | <b>4061.64</b> | <b>14579.34</b> | <b>117.27</b> | <b>36.88</b> |
| <b>49.22</b>  | <b>0.00</b>  | <b>0.00</b> | <b>0.00</b> | <b>0.00</b>  | <b>687.32</b>  | <b>1310.55</b>  | <b>362.59</b>  | <b>1906.29</b>  | <b>7.97</b>   | <b>0.00</b>  |

| Plasma IL-1 | Plasma IL-12 (p40) | Plasma IL-12 (p70) | Plasma IL-13 | Plasma IL-15 | Plasma IP-10 | Plasma KC | Plasma MCP-1 | Plasma MIG | Plasma MIP-1 | Plasma TNF |
|-------------|--------------------|--------------------|--------------|--------------|--------------|-----------|--------------|------------|--------------|------------|
| 0.0         | 0.0                | 0.0                | 0.0          | 0.0          | 39.5         | 337.8     | 0.0          | 182.3      | 0.0          | 0.0        |
| 66.3        | 0.0                | 0.0                | 0.0          | 0.0          | 149.3        | 12684.8   | 409.2        | 152.7      | 22.9         | 96.1       |
| 40.33       | 0                  | 13.03              | 0            | 2.48         | 503.42       | 8981.15   | 931.4        | 1390.58    | 59.63        | 1.4        |
| 14.32       | 0                  | 0                  | 0            | 1.93         | 774.66       | 9695      | 894.85       | 2789.45    | 0            | 0.12       |
| 8.55        | 0                  | 0                  | 0            | 3.27         | 449.12       | 621.46    | 284.04       | 3656.34    | 0            | 0          |
| 5.31        | 0                  | 0                  | 0            | 0            | 93.05        | 397.51    | 0            | 107.87     | 0            | 0          |
| 0           | 0                  | 0                  | 0            | 0            | 36.74        | 166.08    | 0            | 32.19      | 0            | 0          |

|   |   |      |   |   |        |        |       |         |   |   |
|---|---|------|---|---|--------|--------|-------|---------|---|---|
| 0 | 0 | 0    | 0 | 0 | 69.35  | 154.43 | 18.49 | 84.7    | 0 | 0 |
| 0 | 0 | 0    | 0 | 0 | 77.53  | 265.47 | 18.49 | 415.99  | 0 | 0 |
| 0 | 0 | 1.91 | 0 | 0 | 135.28 | 145.69 | 0     | 4840.48 | 0 | 0 |

|        |      |   |   |   |        |         |         |        |        |        |
|--------|------|---|---|---|--------|---------|---------|--------|--------|--------|
| 451.12 | 0    | 0 | 0 | 0 | 305.55 | 10000   | 2322.12 | 111.31 | 151.57 | 158.35 |
| 195.84 | 4.52 | 0 | 0 | 0 | 342.47 | 10000   | 3391.59 | 71.4   | 192.61 | 120.37 |
| 120.86 | 0    | 0 | 0 | 0 | 236.21 | 6172.75 | 4631.45 | 45.53  | 63.74  | 100.71 |

|       |      |   |   |     |        |         |        |         |       |      |
|-------|------|---|---|-----|--------|---------|--------|---------|-------|------|
| 15.98 | 0    | 0 | 0 | 0   | 437.45 | 4222.87 | 467.1  | 2759.09 | 27.24 | 2.68 |
| 1.85  | 0    | 0 | 0 | 0   | 94.55  | 199.19  | 0      | 228.51  | 52.13 | 0    |
| 18.12 | 3.16 | 0 | 0 | 7.6 | 464.73 | 1860.17 | 601.75 | 938.16  | 27.24 | 0.79 |

|      |   |   |   |   |        |         |        |         |   |      |
|------|---|---|---|---|--------|---------|--------|---------|---|------|
| 8.17 | 0 | 0 | 0 | 0 | 578.41 | 8460.93 | 206.83 | 5858.83 | 0 | 0.33 |
| 0    | 0 | 0 | 0 | 0 | 63.41  | 99.22   | 0      | 552.26  | 0 | 0    |

|      |   |      |   |      |        |         |        |         |   |   |
|------|---|------|---|------|--------|---------|--------|---------|---|---|
| 6.26 | 0 | 1.11 | 0 | 2.01 | 497.63 | 5913.97 | 490.68 | 4012.85 | 0 | 0 |
|------|---|------|---|------|--------|---------|--------|---------|---|---|

|      |   |   |   |       |        |         |        |         |   |   |
|------|---|---|---|-------|--------|---------|--------|---------|---|---|
| 6.45 | 0 | 0 | 0 | 9.9   | 462.86 | 549.1   | 171.79 | 9208.99 | 0 | 0 |
| 5.07 | 0 | 0 | 0 | 6.6   | 485.05 | 1212.39 | 456.29 | 4529.12 | 0 | 0 |
| 12.2 | 0 | 0 | 0 | 14.04 | 440.08 | 773.77  | 260.1  | 9409.14 | 0 | 0 |

|      |   |       |   |   |        |        |   |        |       |      |
|------|---|-------|---|---|--------|--------|---|--------|-------|------|
| 1.28 | 0 | 45.63 | 0 | 0 | 100.42 | 262.63 | 0 | 60.08  | 39.56 | 3.62 |
| 4.94 | 0 | 0     | 0 | 0 | 118.79 | 329.28 | 0 | 161.47 | 0     | 0    |
| 5.31 | 0 | 0     | 0 | 0 | 44.32  | 185.58 | 0 | 115.58 | 0     | 0    |

|      |   |   |   |   |       |        |   |       |   |      |
|------|---|---|---|---|-------|--------|---|-------|---|------|
| 0    | 0 | 0 | 0 | 0 | 77.33 | 293.37 | 0 | 37.27 | 0 | 0    |
| 0.45 | 0 | 0 | 0 | 0 | 32.58 | 280.19 | 0 | 22.44 | 0 | 1.01 |

| Plasma | Plasma       | Plasma       | Plasma | Plasma | Plasma | Plasma | Plasma | Plasma  | Plasma  | Plasma |
|--------|--------------|--------------|--------|--------|--------|--------|--------|---------|---------|--------|
| pIL-10 | pIL-12 (p40) | pIL-12 (p70) | pIL-13 | pIL-17 | pIP-10 | pKC    | pMCP-1 | pMIG    | pMIP-1a | pTNFa  |
| 0.0    | 0.0          | 0.0          | 0.0    | 0.0    | 39.5   | 337.8  | 0.0    | 182.3   | 0.0     | 0.0    |
| 0      | 0            | 0            | 0      | 0      | 69.35  | 154.43 | 18.49  | 84.7    | 0       | 0      |
| 0      | 0            | 0            | 0      | 0      | 77.53  | 265.47 | 18.49  | 415.99  | 0       | 0      |
| 0      | 0            | 1.91         | 0      | 0      | 135.28 | 145.69 | 0      | 4840.48 | 0       | 0      |

| pIL-10 | pIL-12 (p40) | pIL-12 (p70) | pIL-13 | pIL-17 | pIP-10 | pKC     | pMCP-1 | pMIG    | pMIP-1a | pTNFa |
|--------|--------------|--------------|--------|--------|--------|---------|--------|---------|---------|-------|
| 66.3   | 0.0          | 0.0          | 0.0    | 0.0    | 149.3  | 12684.8 | 409.2  | 152.7   | 22.9    | 96.1  |
| 40.33  | 0            | 13.03        | 0      | 2.48   | 503.42 | 8981.15 | 931.4  | 1390.58 | 59.63   | 1.4   |
| 14.32  | 0            | 0            | 0      | 1.93   | 774.66 | 9695    | 894.85 | 2789.45 | 0       | 0.12  |
| 8.55   | 0            | 0            | 0      | 3.27   | 449.12 | 621.46  | 284.04 | 3656.34 | 0       | 0     |
| 5.31   | 0            | 0            | 0      | 0      | 93.05  | 397.51  | 0      | 107.87  | 0       | 0     |
| 0      | 0            | 0            | 0      | 0      | 36.74  | 166.08  | 0      | 32.19   | 0       | 0     |

|        |   |   |   |   |        |       |         |        |        |        |
|--------|---|---|---|---|--------|-------|---------|--------|--------|--------|
| 451.12 | 0 | 0 | 0 | 0 | 305.55 | 10000 | 2322.12 | 111.31 | 151.57 | 158.35 |
|--------|---|---|---|---|--------|-------|---------|--------|--------|--------|

|        |      |   |   |   |        |         |         |       |        |        |
|--------|------|---|---|---|--------|---------|---------|-------|--------|--------|
| 195.84 | 4.52 | 0 | 0 | 0 | 342.47 | 10000   | 3391.59 | 71.4  | 192.61 | 120.37 |
| 120.86 | 0    | 0 | 0 | 0 | 236.21 | 6172.75 | 4631.45 | 45.53 | 63.74  | 100.71 |

|       |      |   |   |     |        |         |        |         |       |      |
|-------|------|---|---|-----|--------|---------|--------|---------|-------|------|
| 15.98 | 0    | 0 | 0 | 0   | 437.45 | 4222.87 | 467.1  | 2759.09 | 27.24 | 2.68 |
| 1.85  | 0    | 0 | 0 | 0   | 94.55  | 199.19  | 0      | 228.51  | 52.13 | 0    |
| 18.12 | 3.16 | 0 | 0 | 7.6 | 464.73 | 1860.17 | 601.75 | 938.16  | 27.24 | 0.79 |

|      |   |      |   |      |        |         |        |         |   |      |
|------|---|------|---|------|--------|---------|--------|---------|---|------|
| 8.17 | 0 | 0    | 0 | 0    | 578.41 | 8460.93 | 206.83 | 5858.83 | 0 | 0.33 |
| 0    | 0 | 0    | 0 | 0    | 63.41  | 99.22   | 0      | 552.26  | 0 | 0    |
| 6.26 | 0 | 1.11 | 0 | 2.01 | 497.63 | 5913.97 | 490.68 | 4012.85 | 0 | 0    |

|      |   |   |   |       |        |         |        |         |   |   |
|------|---|---|---|-------|--------|---------|--------|---------|---|---|
| 6.45 | 0 | 0 | 0 | 9.9   | 462.86 | 549.1   | 171.79 | 9208.99 | 0 | 0 |
| 5.07 | 0 | 0 | 0 | 6.6   | 485.05 | 1212.39 | 456.29 | 4529.12 | 0 | 0 |
| 12.2 | 0 | 0 | 0 | 14.04 | 440.08 | 773.77  | 260.1  | 9409.14 | 0 | 0 |

|      |   |       |   |   |        |        |   |        |       |      |
|------|---|-------|---|---|--------|--------|---|--------|-------|------|
| 1.28 | 0 | 45.63 | 0 | 0 | 100.42 | 262.63 | 0 | 60.08  | 39.56 | 3.62 |
| 4.94 | 0 | 0     | 0 | 0 | 118.79 | 329.28 | 0 | 161.47 | 0     | 0    |
| 5.31 | 0 | 0     | 0 | 0 | 44.32  | 185.58 | 0 | 115.58 | 0     | 0    |

|      |   |   |   |   |       |        |   |       |   |      |
|------|---|---|---|---|-------|--------|---|-------|---|------|
| 0    | 0 | 0 | 0 | 0 | 77.33 | 293.37 | 0 | 37.27 | 0 | 0    |
| 0.45 | 0 | 0 | 0 | 0 | 32.58 | 280.19 | 0 | 22.44 | 0 | 1.01 |

| Plasma      | Heart        | Heart       | Heart       | Heart       | Heart      | Heart      | Heart      | Heart      | Heart       | Heart             | Heart             |
|-------------|--------------|-------------|-------------|-------------|------------|------------|------------|------------|-------------|-------------------|-------------------|
| Plasma VEGF | Heart GM-CSF | Heart IFN-γ | Heart IL-1a | Heart IL-1b | Heart IL-2 | Heart IL-4 | Heart IL-5 | Heart IL-6 | Heart IL-10 | Heart IL-12 (p70) | Heart IL-12 (p40) |
| 1.01        | 0            | 25.47       | 36.48       | 8.035       | 8.07       | 1.58       | 1.165      | 19.415     | 2.535       | 0.895             | 0.53              |
| 0.73        | 0            | 22.29       | 26.825      | 5.73        | 8.6        | 1.595      | 1.18       | 17.02      | 3.98        | 0.69              | 0.665             |
| 1.85        | 11.32        | 37.72       | 76.58       | 9.155       | 9.855      | 1.63       | 1.33       | 462.155    | 10.26       | 2.61              | 2.295             |
| 11.16       | 43.26        | 275.63      | 299.18      | 40.955      | 238.445    | 1.125      | 0.455      | 362.95     | 11.675      | 13.015            | 4.7               |
| 5.06        | 14.625       | 128.245     | 133.415     | 6.4076      | 39.635     | 0          | 0          | 89.12      | 52.815      | 24.235            | 4.385             |
| 5.83        | 0            | 180.74      | 220.635     | 15.34       | 34.115     | 0.975      | 0          | 201.41     | 9.2         | 7.525             | 0                 |
| 0.00        | 0            | 137.79      | 117.01      | 22.66       | 23.99      | 0          | 0          | 57.96      | 12.53       | 5.255             | 0                 |
| 1.09        | 4.645        | 45.255      | 64.605      | 8.035       | 9.805      | 1.635      | 1.235      | 28.93      | 3.36        | 1.31              | 1.65              |
| 0.98        | 5.595        | 51.105      | 67.135      | 14.75       | 10.84      | 1.63       | 1.255      | 124.47     | 16.855      | 5.145             | 1.365             |
| 1.05        | 5.595        | 30.89       | 36.015      | 11.355      | 7.09       | 1.61       | 1.295      | 124.225    | 2.74        | 1.98              | 1.365             |
| 10.66       | 37.985       | 414.46      | 325.155     | 25.755      | 34.38      | 1.03       | 0.125      | 333.915    | 14.595      | 15.81             | 0                 |
| 15.60       | 0            | 243.405     | 243.895     | 39.1013     | 70.135     | 0          | 0.56       | 122.105    | 75.205      | 25.785            | 5.27              |
| 0.12        | 0            | 224.71      | 296.405     | 22.315      | 55.25      | 1.015      | 0          | 43.01      | 12.09       | 9.87              | 0                 |
| 0.00        | 0            | 95.275      | 103.47      | 18.745      | 21.43      | 0          | 0          | 28.195     | 6.465       | 2.96              | 0                 |
| 1.23        | 0            | 27.725      | 26.34       | 5.73        | 5.765      | 1.585      | 1.18       | 17.21      | 3.315       | 1.035             | 0.53              |
| 0.75        | 4.645        | 48.085      | 75.77       | 13.51       | 12.82      | 1.615      | 1.22       | 101.63     | 12.855      | 3.145             | 0.805             |
| 1.29        | 8.38         | 22.105      | 26.215      | 9.895       | 4.68       | 1.64       | 1.36       | 142.05     | 4.175       | 1.865             | 1.935             |
| 3.34        | 56.99        | 5838.67     | 8840.51     | 13.2625     | 431.395    | 0          | 39.165     | 5939.18    | 64.46       | 449.145           | 14.21             |
| 11.90       | 0            | 325.795     | 5477.075    | 82.4937     | 5000.2     | 0          | 0          | 180.005    | 30.25       | 15.51             | 3.15              |
| 2.22        | 16.52        | 35.01       | 48.1        | 0           | 13.4       | 0          | 0          | 18.94      | 7.49        | 3.41              | 5.82              |
| 0.00        | 0            | 102.165     | 99.02       | 18.745      | 21.26      | 0          | 0          | 45.71      | 20.895      | 4.92              | 0                 |
| 2.89        | 0            | 39.045      | 31.075      | 6.12        | 6.98       | 1.59       | 1.155      | 18.445     | 3.805       | 0.86              | 1.51              |
| 1.05        | 7.265        | 45.255      | 57.36       | 13.155      | 10.175     | 1.635      | 1.295      | 111.14     | 13.545      | 3.175             | 1.225             |
| 2.52        | 37.985       | 185.45      | 246.295     | 44.29       | 54.42      | 1.125      | 0.915      | 277.225    | 25.195      | 17.665            | 9.62              |
| 9.94        | 0            | 0           | 0           | 89.8226     | 0          | 0          | 23.67      | 3485.88    | 11.795      | 96.14             | 21.975            |
| 12.84       | 0            | 3260.03     | 148.265     | 5000.0      | 369.9      | 0          | 0          | 90.695     | 23.205      | 13.83             | 3.825             |

|      |       |        |        |         |        |   |   |        |        |       |       |
|------|-------|--------|--------|---------|--------|---|---|--------|--------|-------|-------|
| 2.80 | 16.52 | 28.43  | 59.425 | 18.1438 | 18.1   | 0 | 0 | 19.11  | 4.8    | 6.69  | 6.695 |
| 0.00 | 0     | 128.99 | 130.43 | 24.415  | 30.045 | 0 | 0 | 61.195 | 18.475 | 7.365 | 0     |

|       |        |         |          |         |         |       |       |         |        |        |       |
|-------|--------|---------|----------|---------|---------|-------|-------|---------|--------|--------|-------|
| 0.06  | 0      | 201.3   | 346.32   | 15.34   | 61.965  | 1.015 | 0.21  | 54.01   | 15.855 | 8.84   | 0     |
| 0.15  | 37.985 | 179.41  | 189.32   | 38.45   | 36.69   | 1.115 | 0.455 | 75.695  | 21.78  | 15.055 | 4.7   |
| 0.54  | 22.02  | 255.255 | 957.525  | 24.04   | 533.015 | 1.09  | 0.455 | 406.43  | 22.63  | 16.46  | 4.7   |
| 1.92  | 29.585 | 142.925 | 2185.415 | 171.976 | 42.065  | 0     | 0     | 32.72   | 26.75  | 14.555 | 6.695 |
| 2.97  | 0      | 53.585  | 61.855   | 25.81   | 9.94    | 0     | 0     | 183.125 | 6.545  | 6.5    | 0     |
| 10.91 | 16.52  | 33.455  | 45.59    | 8.2004  | 12.32   | 0     | 0     | 342.39  | 0      | 1.31   | 6.695 |
| 0.00  | 0      | 206.75  | 227.01   | 29.255  | 47.065  | 0     | 0     | 69.58   | 15.98  | 11.455 | 0     |

|             |          |               |               |                |              |          |          |               |              |              |          |
|-------------|----------|---------------|---------------|----------------|--------------|----------|----------|---------------|--------------|--------------|----------|
| 0.22        | 0        | 241.615       | 204.955       | 27.465         | 39.96        | 1.07     | 0.61     | 73.76         | 18.805       | 11.33        | 2.445    |
| 1.48        | 37.985   | 719.34        | 2112.96       | 27.465         | 219.58       | 1.125    | 0.765    | 350.32        | 22.845       | 13.87        | 0        |
| 14.14       | 12.47    | 124.635       | 100.105       | 204.6863       | 33.37        | 0        | 0        | 177.01        | 35.625       | 11.62        | 5.82     |
| 0.00        | 5.115    | 45.035        | 63.31         | 35.35          | 10.105       | 0        | 0        | 151.265       | 4.565        | 7.535        | 0        |
| <b>7.89</b> | <b>0</b> | <b>35.775</b> | <b>42.855</b> | <b>10.4995</b> | <b>11.83</b> | <b>0</b> | <b>0</b> | <b>89.225</b> | <b>1.545</b> | <b>0</b>     | <b>0</b> |
| <b>0.00</b> | <b>0</b> | <b>78.685</b> | <b>77.54</b>  | <b>17.295</b>  | <b>18.02</b> | <b>0</b> | <b>0</b> | <b>24.775</b> | <b>3.305</b> | <b>2.535</b> | <b>0</b> |

| Plasma | Heart   | Heart  | Heart  | Heart  | Heart  | Heart | Heart | Heart  | Heart  | Heart        | Heart        |
|--------|---------|--------|--------|--------|--------|-------|-------|--------|--------|--------------|--------------|
| pVEGF  | hGM-CSF | hIFN-g | hIL-1a | hIL-1b | hIL-2  | hIL-4 | hIL-5 | hIL-6  | hIL-10 | hIL-12 (p40) | hIL-12 (p70) |
| 1.01   | 0       | 25.47  | 36.48  | 8.035  | 8.07   | 1.58  | 1.165 | 19.415 | 2.535  | 0.895        | 0.53         |
| 1.09   | 4.645   | 45.255 | 64.605 | 8.035  | 9.805  | 1.635 | 1.235 | 28.93  | 3.36   | 1.31         | 1.65         |
| 1.23   | 0       | 27.725 | 26.34  | 5.73   | 5.765  | 1.585 | 1.18  | 17.21  | 3.315  | 1.035        | 0.53         |
| 2.89   | 0       | 39.045 | 31.075 | 6.12   | 6.98   | 1.59  | 1.155 | 18.445 | 3.805  | 0.86         | 1.51         |
| 0.06   | 0       | 201.3  | 346.32 | 15.34  | 61.965 | 1.015 | 0.21  | 54.01  | 15.855 | 8.84         | 0            |

| pVEGF | hGM-CSF | hIFN-g | hIL-1a | hIL-1b | hIL-2 | hIL-4 | hIL-5 | hIL-6   | hIL-10 | hIL-12 (p40) | hIL-12 (p70) |
|-------|---------|--------|--------|--------|-------|-------|-------|---------|--------|--------------|--------------|
| 0.73  | 0       | 22.29  | 26.825 | 5.73   | 8.6   | 1.595 | 1.18  | 17.02   | 3.98   | 0.69         | 0.665        |
| 1.85  | 11.32   | 37.72  | 76.58  | 9.155  | 9.855 | 1.63  | 1.33  | 462.155 | 10.26  | 2.61         | 2.295        |

|       |        |         |         |        |         |       |       |        |        |        |       |
|-------|--------|---------|---------|--------|---------|-------|-------|--------|--------|--------|-------|
| 11.16 | 43.26  | 275.63  | 299.18  | 40.955 | 238.445 | 1.125 | 0.455 | 362.95 | 11.675 | 13.015 | 4.7   |
| 5.06  | 14.625 | 128.245 | 133.415 | 6.4076 | 39.635  | 0     | 0     | 89.12  | 52.815 | 24.235 | 4.385 |
| 5.83  | 0      | 180.74  | 220.635 | 15.34  | 34.115  | 0.975 | 0     | 201.41 | 9.2    | 7.525  | 0     |
| 0.00  | 0      | 137.79  | 117.01  | 22.66  | 23.99   | 0     | 0     | 57.96  | 12.53  | 5.255  | 0     |

|       |        |         |         |         |        |       |       |         |        |        |       |
|-------|--------|---------|---------|---------|--------|-------|-------|---------|--------|--------|-------|
| 0.98  | 5.595  | 51.105  | 67.135  | 14.75   | 10.84  | 1.63  | 1.255 | 124.47  | 16.855 | 5.145  | 1.365 |
| 1.05  | 5.595  | 30.89   | 36.015  | 11.355  | 7.09   | 1.61  | 1.295 | 124.225 | 2.74   | 1.98   | 1.365 |
| 10.66 | 37.985 | 414.46  | 325.155 | 25.755  | 34.38  | 1.03  | 0.125 | 333.915 | 14.595 | 15.81  | 0     |
| 15.60 | 0      | 243.405 | 243.895 | 39.1013 | 70.135 | 0     | 0.56  | 122.105 | 75.205 | 25.785 | 5.27  |
| 0.12  | 0      | 224.71  | 296.405 | 22.315  | 55.25  | 1.015 | 0     | 43.01   | 12.09  | 9.87   | 0     |
| 0.00  | 0      | 95.275  | 103.47  | 18.745  | 21.43  | 0     | 0     | 28.195  | 6.465  | 2.96   | 0     |

|       |       |         |          |         |         |       |        |         |        |         |       |
|-------|-------|---------|----------|---------|---------|-------|--------|---------|--------|---------|-------|
| 0.75  | 4.645 | 48.085  | 75.77    | 13.51   | 12.82   | 1.615 | 1.22   | 101.63  | 12.855 | 3.145   | 0.805 |
| 1.29  | 8.38  | 22.105  | 26.215   | 9.895   | 4.68    | 1.64  | 1.36   | 142.05  | 4.175  | 1.865   | 1.935 |
| 3.34  | 56.99 | 5838.67 | 8840.51  | 13.2625 | 431.395 | 0     | 39.165 | 5939.18 | 64.46  | 449.145 | 14.21 |
| 11.90 | 0     | 325.795 | 5477.075 | 82.4937 | 5000.2  | 0     | 0      | 180.005 | 30.25  | 15.51   | 3.15  |
| 2.22  | 16.52 | 35.01   | 48.1     | 0       | 13.4    | 0     | 0      | 18.94   | 7.49   | 3.41    | 5.82  |
| 0.00  | 0     | 102.165 | 99.02    | 18.745  | 21.26   | 0     | 0      | 45.71   | 20.895 | 4.92    | 0     |

|       |        |         |         |         |        |       |       |         |        |        |        |
|-------|--------|---------|---------|---------|--------|-------|-------|---------|--------|--------|--------|
| 1.05  | 7.265  | 45.255  | 57.36   | 13.155  | 10.175 | 1.635 | 1.295 | 111.14  | 13.545 | 3.175  | 1.225  |
| 2.52  | 37.985 | 185.45  | 246.295 | 44.29   | 54.42  | 1.125 | 0.915 | 277.225 | 25.195 | 17.665 | 9.62   |
| 9.94  | 0      | 0       | 0       | 89.8226 | 0      | 0     | 23.67 | 3485.88 | 11.795 | 96.14  | 21.975 |
| 12.84 | 0      | 3260.03 | 148.265 | 5000.0  | 369.9  | 0     | 0     | 90.695  | 23.205 | 13.83  | 3.825  |
| 2.80  | 16.52  | 28.43   | 59.425  | 18.1438 | 18.1   | 0     | 0     | 19.11   | 4.8    | 6.69   | 6.695  |
| 0.00  | 0      | 128.99  | 130.43  | 24.415  | 30.045 | 0     | 0     | 61.195  | 18.475 | 7.365  | 0      |

|       |        |         |          |         |         |       |       |         |       |        |       |
|-------|--------|---------|----------|---------|---------|-------|-------|---------|-------|--------|-------|
| 0.15  | 37.985 | 179.41  | 189.32   | 38.45   | 36.69   | 1.115 | 0.455 | 75.695  | 21.78 | 15.055 | 4.7   |
| 0.54  | 22.02  | 255.255 | 957.525  | 24.04   | 533.015 | 1.09  | 0.455 | 406.43  | 22.63 | 16.46  | 4.7   |
| 1.92  | 29.585 | 142.925 | 2185.415 | 171.976 | 42.065  | 0     | 0     | 32.72   | 26.75 | 14.555 | 6.695 |
| 2.97  | 0      | 53.585  | 61.855   | 25.81   | 9.94    | 0     | 0     | 183.125 | 6.545 | 6.5    | 0     |
| 10.91 | 16.52  | 33.455  | 45.59    | 8.2004  | 12.32   | 0     | 0     | 342.39  | 0     | 1.31   | 6.695 |
| 0.00  | 0      | 206.75  | 227.01   | 29.255  | 47.065  | 0     | 0     | 69.58   | 15.98 | 11.455 | 0     |

|      |   |         |         |        |       |      |      |       |        |       |       |
|------|---|---------|---------|--------|-------|------|------|-------|--------|-------|-------|
| 0.22 | 0 | 241.615 | 204.955 | 27.465 | 39.96 | 1.07 | 0.61 | 73.76 | 18.805 | 11.33 | 2.445 |
|------|---|---------|---------|--------|-------|------|------|-------|--------|-------|-------|

|             |          |               |               |                |              |          |          |               |              |              |          |
|-------------|----------|---------------|---------------|----------------|--------------|----------|----------|---------------|--------------|--------------|----------|
| 1.48        | 37.985   | 719.34        | 2112.96       | 27.465         | 219.58       | 1.125    | 0.765    | 350.32        | 22.845       | 13.87        | 0        |
| 14.14       | 12.47    | 124.635       | 100.105       | 204.6863       | 33.37        | 0        | 0        | 177.01        | 35.625       | 11.62        | 5.82     |
| 0.00        | 5.115    | 45.035        | 63.31         | 35.35          | 10.105       | 0        | 0        | 151.265       | 4.565        | 7.535        | 0        |
| <b>7.89</b> | <b>0</b> | <b>35.775</b> | <b>42.855</b> | <b>10.4995</b> | <b>11.83</b> | <b>0</b> | <b>0</b> | <b>89.225</b> | <b>1.545</b> | <b>0</b>     | <b>0</b> |
| <b>0.00</b> | <b>0</b> | <b>78.685</b> | <b>77.54</b>  | <b>17.295</b>  | <b>18.02</b> | <b>0</b> | <b>0</b> | <b>24.775</b> | <b>3.305</b> | <b>2.535</b> | <b>0</b> |

Plasma VEG heart GM-CS heart IFN-g heart IL-1a heart IL-1b heart IL-2 heart IL-4 heart IL-5 heart IL-6 heart IL-10 heart IL-12 ( heart IL-12 (p  
Plasma Heart Heart

|     |   |       |        |        |       |   |   |      |       |      |   |
|-----|---|-------|--------|--------|-------|---|---|------|-------|------|---|
| 0.0 | 0 | 49.34 | 63.845 | 22.31  | 9.725 | 0 | 0 | 17.6 | 4.25  | 5.42 | 0 |
| 0.0 | 0 | 47.39 | 60.245 | 21.6   | 9.295 | 0 | 0 | 17.7 | 5.83  | 6.73 | 0 |
| 0   | 0 | 0     | 6.91   | 7.9    | 0     | 0 | 0 | 0    | 0.925 | 0    | 0 |
| 0   | 0 | 0     | 24.88  | 0      | 0.385 | 0 | 0 | 1.34 | 0.68  | 0    | 0 |
| 0   | 0 | 0     | 3.695  | 0      | 0     | 0 | 0 | 0    | 0     | 0    | 0 |
| 0   | 0 | 3.295 | 21.27  | 62.305 | 3.76  | 0 | 0 | 1.7  | 0     | 0    | 0 |
| 0   | 0 | 6.79  | 28.015 | 44.74  | 5.085 | 0 | 0 | 2.76 | 0.94  | 0    | 0 |

|   |   |   |        |      |      |   |   |   |       |   |   |
|---|---|---|--------|------|------|---|---|---|-------|---|---|
| 0 | 0 | 0 | 0      | 0    | 0    | 0 | 0 | 0 | 0.045 | 0 | 0 |
| 0 | 0 | 0 | 73.235 | 0    | 0    | 0 | 0 | 0 | 1.155 | 0 | 0 |
| 0 | 0 | 0 | 14.895 | 0.91 | 0.65 | 0 | 0 | 0 | 0.805 | 0 | 0 |

|      |   |         |         |        |         |       |       |        |       |        |       |
|------|---|---------|---------|--------|---------|-------|-------|--------|-------|--------|-------|
| 0.39 | 0 | 181.585 | 190.475 | 52.555 | 27.48   | 1.07  | 0.455 | 61.675 | 20.93 | 22.89  | 2.445 |
| 0.08 | 0 | 121.135 | 8.06    | 42.625 | 184.135 | 0.995 | 0.125 | 100.28 | 20.08 | 19.315 | 0     |
| 0    | 0 | 0       | 9.925   | 0      | 0.155   | 0     | 0     | 6.825  | 1.155 | 0      | 0     |

|   |   |      |        |       |      |   |   |      |       |   |   |
|---|---|------|--------|-------|------|---|---|------|-------|---|---|
| 0 | 0 | 0    | 10.045 | 0     | 0.14 | 0 | 0 | 0    | 0.68  | 0 | 0 |
| 0 | 0 | 0    | 11.97  | 2.205 | 0.28 | 0 | 0 | 0    | 1.155 | 0 | 0 |
| 0 | 0 | 2.09 | 90.09  | 3.825 | 3.2  | 0 | 0 | 0.08 | 1.04  | 0 | 0 |

|   |   |       |        |       |       |   |   |      |       |   |   |
|---|---|-------|--------|-------|-------|---|---|------|-------|---|---|
| 0 | 0 | 3.755 | 21.735 | 2.205 | 1.1   | 0 | 0 | 1.91 | 1.155 | 0 | 0 |
| 0 | 0 | 0     | 19.49  | 0     | 0.295 | 0 | 0 | 0    | 0.98  | 0 | 0 |



|   |   |   |        |       |      |   |   |       |       |   |   |
|---|---|---|--------|-------|------|---|---|-------|-------|---|---|
| 0 | 0 | 0 | 59.055 | 4.325 | 1.03 | 0 | 0 | 0.825 | 2.635 | 0 | 0 |
|---|---|---|--------|-------|------|---|---|-------|-------|---|---|

|   |   |   |        |   |       |   |   |   |       |   |   |
|---|---|---|--------|---|-------|---|---|---|-------|---|---|
| 0 | 0 | 0 | 7.66   | 0 | 0.08  | 0 | 0 | 0 | 0.805 | 0 | 0 |
| 0 | 0 | 0 | 8.3    | 0 | 0.09  | 0 | 0 | 0 | 0     | 0 | 0 |
| 0 | 0 | 0 | 11.675 | 0 | 0.235 | 0 | 0 | 0 | 0.555 | 0 | 0 |

|   |        |       |       |        |        |   |   |       |        |      |   |
|---|--------|-------|-------|--------|--------|---|---|-------|--------|------|---|
| 0 | 12.375 | 10.47 | 43.56 | 52.43  | 6.81   | 0 | 0 | 5.865 | 2.47   | 0    | 0 |
| 0 | 26.36  | 10.96 | 92.23 | 17.32  | 14.055 | 0 | 0 | 22.19 | 10.785 | 6.75 | 0 |
| 0 | 0      | 6.52  | 39.42 | 68.895 | 6.24   | 0 | 0 | 4.62  | 1.715  | 0    | 0 |

|   |        |        |        |        |        |   |   |       |       |      |   |
|---|--------|--------|--------|--------|--------|---|---|-------|-------|------|---|
| 0 | 12.375 | 10.145 | 38.145 | 102.79 | 6.155  | 0 | 0 | 5.1   | 1.525 | 1.61 | 0 |
| 0 | 0      | 18.96  | 77.88  | 72.92  | 17.825 | 0 | 0 | 7.525 | 3.39  | 0    | 0 |

| pg/mg  |         |        |        |        |       |       |       |       |        |              |              |
|--------|---------|--------|--------|--------|-------|-------|-------|-------|--------|--------------|--------------|
| Plasma | Heart   | Heart  | Heart  | Heart  | Heart | Heart | Heart | Heart | Heart  | Heart        | Heart        |
| pVEGF  | hGM-CSF | hIFN-g | hIL-1a | hIL-1b | hIL-2 | hIL-4 | hIL-5 | hIL-6 | hIL-10 | hIL-12 (p40) | hIL-12 (p70) |
| 0.0    | 0       | 49.34  | 63.845 | 22.31  | 9.725 | 0     | 0     | 17.6  | 4.25   | 5.42         | 0            |
| 0      | 0       | 0      | 0      | 0      | 0     | 0     | 0     | 0     | 0.045  | 0            | 0            |
| 0      | 0       | 0      | 73.235 | 0      | 0     | 0     | 0     | 0     | 1.155  | 0            | 0            |
| 0      | 0       | 0      | 14.895 | 0.91   | 0.65  | 0     | 0     | 0     | 0.805  | 0            | 0            |

| pVEGF | hGM-CSF | hIFN-g | hIL-1a | hIL-1b | hIL-2 | hIL-4 | hIL-5 | hIL-6 | hIL-10 | hIL-12 (p40) | hIL-12 (p70) |
|-------|---------|--------|--------|--------|-------|-------|-------|-------|--------|--------------|--------------|
| 0.0   | 0       | 47.39  | 60.245 | 21.6   | 9.295 | 0     | 0     | 17.7  | 5.83   | 6.73         | 0            |
| 0     | 0       | 0      | 6.91   | 7.9    | 0     | 0     | 0     | 0     | 0.925  | 0            | 0            |
| 0     | 0       | 0      | 24.88  | 0      | 0.385 | 0     | 0     | 1.34  | 0.68   | 0            | 0            |
| 0     | 0       | 0      | 3.695  | 0      | 0     | 0     | 0     | 0     | 0      | 0            | 0            |
| 0     | 0       | 3.295  | 21.27  | 62.305 | 3.76  | 0     | 0     | 1.7   | 0      | 0            | 0            |
| 0     | 0       | 6.79   | 28.015 | 44.74  | 5.085 | 0     | 0     | 2.76  | 0.94   | 0            | 0            |

|      |   |         |         |        |       |      |       |        |       |       |       |
|------|---|---------|---------|--------|-------|------|-------|--------|-------|-------|-------|
| 0.39 | 0 | 181.585 | 190.475 | 52.555 | 27.48 | 1.07 | 0.455 | 61.675 | 20.93 | 22.89 | 2.445 |
|------|---|---------|---------|--------|-------|------|-------|--------|-------|-------|-------|

|      |   |         |       |        |         |       |       |        |       |        |   |
|------|---|---------|-------|--------|---------|-------|-------|--------|-------|--------|---|
| 0.08 | 0 | 121.135 | 8.06  | 42.625 | 184.135 | 0.995 | 0.125 | 100.28 | 20.08 | 19.315 | 0 |
| 0    | 0 | 0       | 9.925 | 0      | 0.155   | 0     | 0     | 6.825  | 1.155 | 0      | 0 |

|   |   |      |        |       |      |   |   |      |       |   |   |
|---|---|------|--------|-------|------|---|---|------|-------|---|---|
| 0 | 0 | 0    | 10.045 | 0     | 0.14 | 0 | 0 | 0    | 0.68  | 0 | 0 |
| 0 | 0 | 0    | 11.97  | 2.205 | 0.28 | 0 | 0 | 0    | 1.155 | 0 | 0 |
| 0 | 0 | 2.09 | 90.09  | 3.825 | 3.2  | 0 | 0 | 0.08 | 1.04  | 0 | 0 |

|   |   |       |        |       |       |   |   |       |       |   |   |
|---|---|-------|--------|-------|-------|---|---|-------|-------|---|---|
| 0 | 0 | 3.755 | 21.735 | 2.205 | 1.1   | 0 | 0 | 1.91  | 1.155 | 0 | 0 |
| 0 | 0 | 0     | 19.49  | 0     | 0.295 | 0 | 0 | 0     | 0.98  | 0 | 0 |
| 0 | 0 | 0     | 59.055 | 4.325 | 1.03  | 0 | 0 | 0.825 | 2.635 | 0 | 0 |

|   |   |   |        |   |       |   |   |   |       |   |   |
|---|---|---|--------|---|-------|---|---|---|-------|---|---|
| 0 | 0 | 0 | 7.66   | 0 | 0.08  | 0 | 0 | 0 | 0.805 | 0 | 0 |
| 0 | 0 | 0 | 8.3    | 0 | 0.09  | 0 | 0 | 0 | 0     | 0 | 0 |
| 0 | 0 | 0 | 11.675 | 0 | 0.235 | 0 | 0 | 0 | 0.555 | 0 | 0 |

|   |        |       |       |        |        |   |   |       |        |      |   |
|---|--------|-------|-------|--------|--------|---|---|-------|--------|------|---|
| 0 | 12.375 | 10.47 | 43.56 | 52.43  | 6.81   | 0 | 0 | 5.865 | 2.47   | 0    | 0 |
| 0 | 26.36  | 10.96 | 92.23 | 17.32  | 14.055 | 0 | 0 | 22.19 | 10.785 | 6.75 | 0 |
| 0 | 0      | 6.52  | 39.42 | 68.895 | 6.24   | 0 | 0 | 4.62  | 1.715  | 0    | 0 |

|   |        |        |        |        |        |   |   |       |       |      |   |
|---|--------|--------|--------|--------|--------|---|---|-------|-------|------|---|
| 0 | 12.375 | 10.145 | 38.145 | 102.79 | 6.155  | 0 | 0 | 5.1   | 1.525 | 1.61 | 0 |
| 0 | 0      | 18.96  | 77.88  | 72.92  | 17.825 | 0 | 0 | 7.525 | 3.39  | 0    | 0 |

|       |       |       |       |       |       |       |       |       | liver GM-C | liver IFN-g | liver IL-1a | liver IL-1b |
|-------|-------|-------|-------|-------|-------|-------|-------|-------|------------|-------------|-------------|-------------|
| Heart | Heart | Heart | Heart | Heart | Heart | Heart | Heart | Heart | Liver      | Liver       | Liver       | Liver       |

heart IL-13 heart IL-17 heart IP-10 heart KC heart MCP heart MIG heart MIP- heart TNFa heart VEGF liver GM-C liver IFN-g liver IL-1a liver IL-1b

|         |        |          |          |          |          |          |        |         |        |         |          |          |
|---------|--------|----------|----------|----------|----------|----------|--------|---------|--------|---------|----------|----------|
| 1.795   | 1.34   | 541.505  | 50.21    | 12.895   | 583.66   | 5.28     | 2.09   | 24.445  | 9.42   | 30.58   | 134.905  | 49.67    |
| 1.61    | 1.32   | 20.515   | 25.575   | 10.485   | 365.885  | 4.66     | 2.105  | 98.185  | 4.645  | 78.135  | 140.62   | 13.865   |
| 37.035  | 1.41   | 2208.81  | 1194.19  | 1260.995 | 4892.455 | 65.285   | 2.19   | 117.76  | 9.42   | 0       | 803.03   | 56.12    |
| 0       | 0      | 5000.0   | 1077.07  | 1104.185 | 11939.02 | 115.39   | 2.02   | 106.295 | 47.77  | 276.485 | 1751.585 | 104.1    |
| 9.285   | 0      | 1124.405 | 606.675  | 382.86   | 12071.31 | 19.715   | 0      | 37.045  | 43.17  | 141.415 | 317.55   | 71.5709  |
| 0       | 0      | 1029.15  | 388.365  | 245.095  | 9582.91  | 41.925   | 0.715  | 22.525  | 0      | 51.66   | 230.215  | 18.85    |
| 0       | 0.165  | 153.685  | 70.01    | 251.265  | 2066.465 | 18.755   | 0      | 0.58    | 0      | 6.905   | 135.36   | 15.835   |
| 19.455  | 1.425  | 75.02    | 5.3      | 9.48     | 581.505  | 6.435    | 2.11   | 20.115  | 8.735  | 174.055 | 411.075  | 47.81    |
| 27.19   | 1.365  | 105.42   | 2216.72  | 393.705  | 184.505  | 31.785   | 2.765  | 38.575  | 9.42   | 65.93   | 127.99   | 23.475   |
| 28.765  | 1.405  | 3295.235 | 538.895  | 715.605  | 3623.705 | 34.735   | 2.17   | 45.31   | 7.265  | 64.565  | 114.705  | 34.905   |
| 0       | 0      | 1649.66  | 1007.645 | 990.635  | 10717.89 | 92.98    | 1.545  | 78.91   | 47.77  | 194.4   | 927.055  | 91.385   |
| 45.87   | 0      | 793.12   | 238.975  | 149.89   | 9928.695 | 19.715   | 0      | 42.265  | 45.975 | 99.505  | 277.565  | 51.7588  |
| 0       | 0      | 39.75    | 8.755    | 0        | 887.985  | 25.205   | 0.885  | 19.93   | 0      | 17.585  | 237.455  | 29.17    |
| 0       | 0.135  | 75.615   | 23.665   | 115.51   | 1205.315 | 11.435   | 0      | 1.215   | 0      | 0.445   | 169.72   | 12.105   |
| 0.5     | 1.355  | 37.925   | 2.75     | 6.81     | 236.03   | 2.56     | 2.075  | 51.6    | 0      | 25.19   | 87.105   | 8.785    |
| 19.5    | 1.39   | 134.105  | 1811.795 | 319.025  | 304.01   | 31.185   | 2.62   | 43.315  | 2.255  | 101.255 | 480.03   | 11.72    |
| 33.97   | 1.465  | 3206.06  | 645.585  | 599.935  | 4957.995 | 48.27    | 2.22   | 33.605  | 11.32  | 145.985 | 285.11   | 40.935   |
| 177.685 | 1.77   | 481.27   | 3885.15  | 1170.46  | 22265.9  | 2195.685 | 21.635 | 369.845 | 14.625 | 22.14   | 225.195  | 56.7886  |
| 0       | 0      | 1568.205 | 463.435  | 398.9    | 22265.86 | 12.53    | 0      | 32.845  | 49.265 | 139.525 | 370.835  | 69.3548  |
| 0       | 0      | 168.515  | 65.155   | 59.315   | 5824.805 | 19.715   | 0      | 7.695   | 25.14  | 9.67    | 101.17   | 18.1438  |
| 2.35    | 0.135  | 123.98   | 65.215   | 255.385  | 1390.04  | 13.005   | 0      | 0.225   | 6.795  | 17.23   | 175.855  | 25.115   |
| 1.43    | 1.355  | 27.28    | 1.76     | 4.44     | 274.28   | 3.67     | 2.075  | 33.225  | 7.265  | 86.48   | 5000.0   | 30.715   |
| 23.365  | 1.42   | 184.23   | 2651.71  | 467.71   | 399.09   | 51.915   | 2.815  | 86.615  | 7.265  | 32.125  | 395.3    | 15.275   |
| 82.63   | 0      | 5000.0   | 1007.545 | 967.255  | 6566.045 | 75.785   | 2.325  | 62.155  | 67.27  | 174.465 | 711.21   | 135.535  |
| 155.995 | 369.61 | 0        | 5547.905 | 2680.205 | 22265.9  | 177.895  | 21.205 | 40.02   | 27.45  | 19.105  | 174.22   | 233.7031 |
| 0       | 0      | 891.09   | 355.865  | 266.905  | 14622.84 | 15.4     | 0      | 21.855  | 51.145 | 142.925 | 232.97   | 108.8545 |

|         |       |          |          |          |          |        |       |        |        |         |         |         |
|---------|-------|----------|----------|----------|----------|--------|-------|--------|--------|---------|---------|---------|
| 0       | 0     | 181.39   | 77.645   | 115.24   | 2755.775 | 21.325 | 0     | 17.605 | 12.47  | 5.86    | 106.46  | 14.3922 |
| 0       | 0.295 | 133.345  | 93.245   | 279.91   | 1810.505 | 13.005 | 0     | 0.575  | 0      | 52.21   | 194.04  | 20.535  |
| 0       | 0     | 272.55   | 53.06    | 0        | 926.73   | 0      | 1.055 | 38.935 | 43.26  | 278.93  | 624.76  | 68.88   |
| 100.475 | 0     | 353.91   | 1453.28  | 398.64   | 1010.88  | 60.985 | 6.055 | 97.91  | 47.77  | 245.02  | 981.09  | 94.575  |
| 52.18   | 0     | 5000.0   | 1365.51  | 1132.615 | 5571.61  | 98.47  | 2.48  | 47.555 | 37.985 | 254.525 | 736.225 | 132.41  |
| 0       | 0     | 178.98   | 23.135   | 43.015   | 3318.905 | 24.39  | 0     | 5.96   | 31.585 | 25.57   | 136.21  | 35.2584 |
| 0       | 0.19  | 3368.805 | 942.86   | 770.245  | 9308.71  | 46.83  | 0     | 29.02  | 13.565 | 194.41  | 273.48  | 69.335  |
| 0       | 0     | 2201.305 | 997.015  | 344.28   | 7429.095 | 27.29  | 0     | 28.94  | 12.47  | 8.97    | 104.965 | 0       |
| 11.535  | 0.425 | 355.97   | 87.835   | 89.96    | 4075.76  | 15.97  | 0     | 5.525  | 0      | 21.755  | 251.205 | 12.105  |
| 0       | 0     | 158.6    | 1494.555 | 446.715  | 266.715  | 50.32  | 3.95  | 35.25  | 51.75  | 241.005 | 685.975 | 137.095 |
| 53.15   | 0     | 5000.0   | 1072.89  | 886.18   | 11537.05 | 81.025 | 2.175 | 68.17  | 61.71  | 270.745 | 4203.37 | 154.195 |
| 0       | 0     | 2162.55  | 559.23   | 531.47   | 8710.49  | 48.16  | 0     | 46.34  | 16.52  | 23.645  | 339.165 | 97.9151 |
| 0       | 0.245 | 2306.22  | 567.62   | 439.34   | 9689.35  | 21.4   | 0     | 22.21  | 19.78  | 217.165 | 284.355 | 106.155 |
| 0       | 0     | 1008.675 | 227.405  | 96.96    | 6517.595 | 8.145  | 0     | 19.235 | 0      | 6.73    | 133.535 | 13.2966 |
| 0       | 0.025 | 183.76   | 57.825   | 142.96   | 2103.71  | 8.025  | 0     | 0.59   | 2.835  | 140.74  | 236.425 | 43.29   |

| Heart  | Heart  | Heart   | Heart | Heart  | Heart   | Heart   | Heart | Heart  | Liver   | Liver   | Liver   | Liver  |
|--------|--------|---------|-------|--------|---------|---------|-------|--------|---------|---------|---------|--------|
| hIL-13 | hIL-17 | hIP-10  | hKC   | hMCP-1 | hMIG    | hMIP-1a | hTNFa | hVEGF  | LGM-CSF | LIFN-g  | LIL-1a  | LIL-1b |
| 1.795  | 1.34   | 541.505 | 50.21 | 12.895 | 583.66  | 5.28    | 2.09  | 24.445 | 9.42    | 30.58   | 134.905 | 49.67  |
| 19.455 | 1.425  | 75.02   | 5.3   | 9.48   | 581.505 | 6.435   | 2.11  | 20.115 | 8.735   | 174.055 | 411.075 | 47.81  |
| 0.5    | 1.355  | 37.925  | 2.75  | 6.81   | 236.03  | 2.56    | 2.075 | 51.6   | 0       | 25.19   | 87.105  | 8.785  |
| 1.43   | 1.355  | 27.28   | 1.76  | 4.44   | 274.28  | 3.67    | 2.075 | 33.225 | 7.265   | 86.48   | 5000.0  | 30.715 |
| 0      | 0      | 272.55  | 53.06 | 0      | 926.73  | 0       | 1.055 | 38.935 | 43.26   | 278.93  | 624.76  | 68.88  |

| hIL-13 | hIL-17 | hIP-10  | hKC     | hMCP-1   | hMIG     | hMIP-1a | hTNFa | hVEGF  | LGM-CSF | LIFN-g | LIL-1a | LIL-1b |
|--------|--------|---------|---------|----------|----------|---------|-------|--------|---------|--------|--------|--------|
| 1.61   | 1.32   | 20.515  | 25.575  | 10.485   | 365.885  | 4.66    | 2.105 | 98.185 | 4.645   | 78.135 | 140.62 | 13.865 |
| 37.035 | 1.41   | 2208.81 | 1194.19 | 1260.995 | 4892.455 | 65.285  | 2.19  | 117.76 | 9.42    | 0      | 803.03 | 56.12  |

|         |        |          |          |          |          |          |        |         |        |         |          |          |
|---------|--------|----------|----------|----------|----------|----------|--------|---------|--------|---------|----------|----------|
| 0       | 0      | 5000.0   | 1077.07  | 1104.185 | 11939.02 | 115.39   | 2.02   | 106.295 | 47.77  | 276.485 | 1751.585 | 104.1    |
| 9.285   | 0      | 1124.405 | 606.675  | 382.86   | 12071.31 | 19.715   | 0      | 37.045  | 43.17  | 141.415 | 317.55   | 71.5709  |
| 0       | 0      | 1029.15  | 388.365  | 245.095  | 9582.91  | 41.925   | 0.715  | 22.525  | 0      | 51.66   | 230.215  | 18.85    |
| 0       | 0.165  | 153.685  | 70.01    | 251.265  | 2066.465 | 18.755   | 0      | 0.58    | 0      | 6.905   | 135.36   | 15.835   |
| 27.19   | 1.365  | 105.42   | 2216.72  | 393.705  | 184.505  | 31.785   | 2.765  | 38.575  | 9.42   | 65.93   | 127.99   | 23.475   |
| 28.765  | 1.405  | 3295.235 | 538.895  | 715.605  | 3623.705 | 34.735   | 2.17   | 45.31   | 7.265  | 64.565  | 114.705  | 34.905   |
| 0       | 0      | 1649.66  | 1007.645 | 990.635  | 10717.89 | 92.98    | 1.545  | 78.91   | 47.77  | 194.4   | 927.055  | 91.385   |
| 45.87   | 0      | 793.12   | 238.975  | 149.89   | 9928.695 | 19.715   | 0      | 42.265  | 45.975 | 99.505  | 277.565  | 51.7588  |
| 0       | 0      | 39.75    | 8.755    | 0        | 887.985  | 25.205   | 0.885  | 19.93   | 0      | 17.585  | 237.455  | 29.17    |
| 0       | 0.135  | 75.615   | 23.665   | 115.51   | 1205.315 | 11.435   | 0      | 1.215   | 0      | 0.445   | 169.72   | 12.105   |
| 19.5    | 1.39   | 134.105  | 1811.795 | 319.025  | 304.01   | 31.185   | 2.62   | 43.315  | 2.255  | 101.255 | 480.03   | 11.72    |
| 33.97   | 1.465  | 3206.06  | 645.585  | 599.935  | 4957.995 | 48.27    | 2.22   | 33.605  | 11.32  | 145.985 | 285.11   | 40.935   |
| 177.685 | 1.77   | 481.27   | 3885.15  | 1170.46  | 22265.9  | 2195.685 | 21.635 | 369.845 | 14.625 | 22.14   | 225.195  | 56.7886  |
| 0       | 0      | 1568.205 | 463.435  | 398.9    | 22265.86 | 12.53    | 0      | 32.845  | 49.265 | 139.525 | 370.835  | 69.3548  |
| 0       | 0      | 168.515  | 65.155   | 59.315   | 5824.805 | 19.715   | 0      | 7.695   | 25.14  | 9.67    | 101.17   | 18.1438  |
| 2.35    | 0.135  | 123.98   | 65.215   | 255.385  | 1390.04  | 13.005   | 0      | 0.225   | 6.795  | 17.23   | 175.855  | 25.115   |
| 23.365  | 1.42   | 184.23   | 2651.71  | 467.71   | 399.09   | 51.915   | 2.815  | 86.615  | 7.265  | 32.125  | 395.3    | 15.275   |
| 82.63   | 0      | 5000.0   | 1007.545 | 967.255  | 6566.045 | 75.785   | 2.325  | 62.155  | 67.27  | 174.465 | 711.21   | 135.535  |
| 155.995 | 369.61 | 0        | 5547.905 | 2680.205 | 22265.9  | 177.895  | 21.205 | 40.02   | 27.45  | 19.105  | 174.22   | 233.7031 |
| 0       | 0      | 891.09   | 355.865  | 266.905  | 14622.84 | 15.4     | 0      | 21.855  | 51.145 | 142.925 | 232.97   | 108.8545 |
| 0       | 0      | 181.39   | 77.645   | 115.24   | 2755.775 | 21.325   | 0      | 17.605  | 12.47  | 5.86    | 106.46   | 14.3922  |
| 0       | 0.295  | 133.345  | 93.245   | 279.91   | 1810.505 | 13.005   | 0      | 0.575   | 0      | 52.21   | 194.04   | 20.535   |
| 100.475 | 0      | 353.91   | 1453.28  | 398.64   | 1010.88  | 60.985   | 6.055  | 97.91   | 47.77  | 245.02  | 981.09   | 94.575   |
| 52.18   | 0      | 5000.0   | 1365.51  | 1132.615 | 5571.61  | 98.47    | 2.48   | 47.555  | 37.985 | 254.525 | 736.225  | 132.41   |
| 0       | 0      | 178.98   | 23.135   | 43.015   | 3318.905 | 24.39    | 0      | 5.96    | 31.585 | 25.57   | 136.21   | 35.2584  |
| 0       | 0.19   | 3368.805 | 942.86   | 770.245  | 9308.71  | 46.83    | 0      | 29.02   | 13.565 | 194.41  | 273.48   | 69.335   |
| 0       | 0      | 2201.305 | 997.015  | 344.28   | 7429.095 | 27.29    | 0      | 28.94   | 12.47  | 8.97    | 104.965  | 0        |
| 11.535  | 0.425  | 355.97   | 87.835   | 89.96    | 4075.76  | 15.97    | 0      | 5.525   | 0      | 21.755  | 251.205  | 12.105   |
| 0       | 0      | 158.6    | 1494.555 | 446.715  | 266.715  | 50.32    | 3.95   | 35.25   | 51.75  | 241.005 | 685.975  | 137.095  |

|          |              |                 |                |               |                 |              |          |               |              |               |                |                |
|----------|--------------|-----------------|----------------|---------------|-----------------|--------------|----------|---------------|--------------|---------------|----------------|----------------|
| 53.15    | 0            | 5000.0          | 1072.89        | 886.18        | 11537.05        | 81.025       | 2.175    | 68.17         | 61.71        | 270.745       | 4203.37        | 154.195        |
| 0        | 0            | 2162.55         | 559.23         | 531.47        | 8710.49         | 48.16        | 0        | 46.34         | 16.52        | 23.645        | 339.165        | 97.9151        |
| 0        | 0.245        | 2306.22         | 567.62         | 439.34        | 9689.35         | 21.4         | 0        | 22.21         | 19.78        | 217.165       | 284.355        | 106.155        |
| <b>0</b> | <b>0</b>     | <b>1008.675</b> | <b>227.405</b> | <b>96.96</b>  | <b>6517.595</b> | <b>8.145</b> | <b>0</b> | <b>19.235</b> | <b>0</b>     | <b>6.73</b>   | <b>133.535</b> | <b>13.2966</b> |
| <b>0</b> | <b>0.025</b> | <b>183.76</b>   | <b>57.825</b>  | <b>142.96</b> | <b>2103.71</b>  | <b>8.025</b> | <b>0</b> | <b>0.59</b>   | <b>2.835</b> | <b>140.74</b> | <b>236.425</b> | <b>43.29</b>   |

heart IL-13 heart IL-17 heart IP-10 heart KC heart MCP heart MIG heart MIP- heart TNFa heart VEGF liver GM-C liver IFN-g liver IL-1a liver IL-1b  
Heart Heart Heart Heart Heart Heart Heart Heart Heart Liver Liver Liver Liver

heart IL-13 heart IL-17 heart IP-10 heart KC heart MCP heart MIG heart MIP- heart TNFa heart VEGF liver GM-C liver IFN-g liver IL-1a liver IL-1b

|      |      |        |        |        |          |        |       |        |        |        |         |        |
|------|------|--------|--------|--------|----------|--------|-------|--------|--------|--------|---------|--------|
| 0    | 0    | 79.345 | 12.705 | 9.02   | 1146.07  | 11.435 | 0     | 2.115  | 11.65  | 365.33 | 469.51  | 90.075 |
| 0    | 0.19 | 65.86  | 154.92 | 22.795 | 392.35   | 11.435 | 0     | 3.215  | 23.605 | 178.1  | 235.135 | 91.88  |
| 0    | 0    | 62.755 | 80.555 | 94.34  | 1047.265 | 0      | 0     | 37.995 | 3.015  | 0      | 21.025  | 12.195 |
| 0    | 0    | 47.635 | 43.45  | 14.59  | 1415.155 | 0      | 0     | 3.005  | 0      | 0      | 27.85   | 5.735  |
| 0    | 0    | 46.84  | 7.955  | 35.815 | 1515.215 | 0      | 0     | 3.49   | 0      | 0      | 45.195  | 9.915  |
| 0.07 | 0    | 22.125 | 6.94   | 34.05  | 440.615  | 0      | 0.89  | 12.525 | 26.36  | 111.65 | 182.125 | 40.895 |
| 0    | 0    | 8.44   | 2.25   | 13.07  | 269.215  | 5.66   | 0.505 | 38.205 | 30.785 | 47.98  | 142.59  | 44.205 |

|   |   |       |       |        |         |   |   |       |       |   |        |       |
|---|---|-------|-------|--------|---------|---|---|-------|-------|---|--------|-------|
| 0 | 0 | 30.33 | 4.075 | 4.39   | 343.365 | 0 | 0 | 45.26 | 0     | 0 | 8.24   | 0     |
| 0 | 0 | 15.38 | 0     | 1.625  | 240.81  | 0 | 0 | 49.2  | 3.015 | 0 | 14.015 | 4.805 |
| 0 | 0 | 11.55 | 0     | 10.885 | 97.895  | 0 | 0 | 22.3  | 0     | 0 | 9.695  | 3.31  |

|       |   |         |         |         |         |       |       |       |       |         |         |        |
|-------|---|---------|---------|---------|---------|-------|-------|-------|-------|---------|---------|--------|
| 34.94 | 0 | 243.165 | 588.895 | 195.725 | 701.11  | 50.32 | 2.175 | 11.13 | 67.27 | 268.185 | 494.555 | 119.09 |
| 0     | 0 | 46.165  | 775.465 | 319.015 | 296.395 | 0     | 2.175 | 9.365 | 43.26 | 270.87  | 832.215 | 89.79  |
| 0     | 0 | 44.97   | 392.46  | 125.25  | 80.165  | 0     | 0.08  | 12.44 | 0     | 0       | 33.81   | 11.07  |

|   |   |       |        |        |         |   |      |        |       |   |        |       |
|---|---|-------|--------|--------|---------|---|------|--------|-------|---|--------|-------|
| 0 | 0 | 54.8  | 37     | 54.485 | 681.245 | 0 | 0    | 27.715 | 9.31  | 0 | 19.02  | 7.48  |
| 0 | 0 | 26    | 1.055  | 0      | 113.46  | 0 | 0    | 43.03  | 0     | 0 | 11.325 | 4.325 |
| 0 | 0 | 47.17 | 84.635 | 45.77  | 93.715  | 0 | 0.02 | 28.875 | 3.015 | 0 | 9.985  | 3.31  |

|   |      |       |       |        |         |   |   |      |       |   |        |      |
|---|------|-------|-------|--------|---------|---|---|------|-------|---|--------|------|
| 0 | 0.18 | 97.76 | 34.79 | 15.285 | 1161.04 | 0 | 0 | 2.55 | 0     | 0 | 25.825 | 0.91 |
| 0 | 0    | 12.26 | 0     | 0      | 89.49   | 0 | 0 | 1.18 | 3.015 | 0 | 43.875 | 9.12 |

|   |   |        |       |       |          |   |   |      |      |       |         |        |
|---|---|--------|-------|-------|----------|---|---|------|------|-------|---------|--------|
| 0 | 0 | 54.225 | 18.12 | 6.515 | 3643.645 | 0 | 0 | 0.26 | 13.1 | 0.365 | 132.795 | 32.895 |
|---|---|--------|-------|-------|----------|---|---|------|------|-------|---------|--------|

|   |   |        |       |        |          |   |   |       |   |       |         |        |
|---|---|--------|-------|--------|----------|---|---|-------|---|-------|---------|--------|
| 0 | 0 | 48.935 | 9.055 | 21.025 | 2170.285 | 0 | 0 | 0.205 | 0 | 12.72 | 289.275 | 25.795 |
| 0 | 0 | 85.055 | 9.77  | 39.56  | 3087.62  | 0 | 0 | 2.2   | 0 | 0     | 34.885  | 12.93  |
| 0 | 0 | 37.19  | 9.2   | 10.08  | 1673.215 | 0 | 0 | 1.105 | 0 | 6.93  | 274.62  | 28.21  |

|       |   |       |       |        |         |        |       |        |        |       |        |         |
|-------|---|-------|-------|--------|---------|--------|-------|--------|--------|-------|--------|---------|
| 2.94  | 0 | 10.01 | 6.01  | 31.375 | 286.935 | 11.785 | 1.095 | 31.425 | 12.375 | 35.44 | 123.17 | 29.86   |
| 0     | 0 | 45.47 | 25.52 | 22.78  | 1015.13 | 22.985 | 3.065 | 18.67  | 0      | 2.97  | 24.48  | 107.085 |
| 2.575 | 0 | 12.42 | 5.74  | 39.615 | 185.8   | 5.66   | 0.37  | 15.375 | 0      | 13.02 | 67.135 | 10.77   |

|        |   |       |       |       |         |        |       |        |        |        |        |        |
|--------|---|-------|-------|-------|---------|--------|-------|--------|--------|--------|--------|--------|
| 20.505 | 0 | 20.67 | 7.025 | 22.78 | 180.17  | 11.785 | 1.495 | 48.525 | 43.68  | 61.47  | 128.73 | 32.5   |
| 11.67  | 0 | 8.965 | 4.605 | 20.07 | 388.645 | 5.66   | 1.015 | 42.355 | 34.555 | 73.925 | 77.945 | 41.735 |

| pg/mg  |        |        |        |        |         |         |       |       |         |        |        |        |
|--------|--------|--------|--------|--------|---------|---------|-------|-------|---------|--------|--------|--------|
| Heart  | Heart  | Heart  | Heart  | Heart  | Heart   | Heart   | Heart | Heart | Liver   | Liver  | Liver  | Liver  |
| hIL-13 | hIL-17 | hIP-10 | hKC    | hMCP-1 | hMIG    | hMIP-1a | hTNFa | hVEGF | LGM-CSF | LIFN-g | LIL-1a | LIL-1b |
| 0      | 0      | 79.345 | 12.705 | 9.02   | 1146.07 | 11.435  | 0     | 2.115 | 11.65   | 365.33 | 469.51 | 90.075 |
| 0      | 0      | 30.33  | 4.075  | 4.39   | 343.365 | 0       | 0     | 45.26 | 0       | 0      | 8.24   | 0      |
| 0      | 0      | 15.38  | 0      | 1.625  | 240.81  | 0       | 0     | 49.2  | 3.015   | 0      | 14.015 | 4.805  |
| 0      | 0      | 11.55  | 0      | 10.885 | 97.895  | 0       | 0     | 22.3  | 0       | 0      | 9.695  | 3.31   |

| hIL-13 | hIL-17 | hIP-10 | hKC    | hMCP-1 | hMIG     | hMIP-1a | hTNFa | hVEGF  | LGM-CSF | LIFN-g | LIL-1a  | LIL-1b |
|--------|--------|--------|--------|--------|----------|---------|-------|--------|---------|--------|---------|--------|
| 0      | 0.19   | 65.86  | 154.92 | 22.795 | 392.35   | 11.435  | 0     | 3.215  | 23.605  | 178.1  | 235.135 | 91.88  |
| 0      | 0      | 62.755 | 80.555 | 94.34  | 1047.265 | 0       | 0     | 37.995 | 3.015   | 0      | 21.025  | 12.195 |
| 0      | 0      | 47.635 | 43.45  | 14.59  | 1415.155 | 0       | 0     | 3.005  | 0       | 0      | 27.85   | 5.735  |
| 0      | 0      | 46.84  | 7.955  | 35.815 | 1515.215 | 0       | 0     | 3.49   | 0       | 0      | 45.195  | 9.915  |
| 0.07   | 0      | 22.125 | 6.94   | 34.05  | 440.615  | 0       | 0.89  | 12.525 | 26.36   | 111.65 | 182.125 | 40.895 |
| 0      | 0      | 8.44   | 2.25   | 13.07  | 269.215  | 5.66    | 0.505 | 38.205 | 30.785  | 47.98  | 142.59  | 44.205 |

|       |   |         |         |         |        |       |       |       |       |         |         |        |
|-------|---|---------|---------|---------|--------|-------|-------|-------|-------|---------|---------|--------|
| 34.94 | 0 | 243.165 | 588.895 | 195.725 | 701.11 | 50.32 | 2.175 | 11.13 | 67.27 | 268.185 | 494.555 | 119.09 |
|-------|---|---------|---------|---------|--------|-------|-------|-------|-------|---------|---------|--------|

|        |      |        |         |         |          |        |       |        |        |        |         |         |
|--------|------|--------|---------|---------|----------|--------|-------|--------|--------|--------|---------|---------|
| 0      | 0    | 46.165 | 775.465 | 319.015 | 296.395  | 0      | 2.175 | 9.365  | 43.26  | 270.87 | 832.215 | 89.79   |
| 0      | 0    | 44.97  | 392.46  | 125.25  | 80.165   | 0      | 0.08  | 12.44  | 0      | 0      | 33.81   | 11.07   |
| 0      | 0    | 54.8   | 37      | 54.485  | 681.245  | 0      | 0     | 27.715 | 9.31   | 0      | 19.02   | 7.48    |
| 0      | 0    | 26     | 1.055   | 0       | 113.46   | 0      | 0     | 43.03  | 0      | 0      | 11.325  | 4.325   |
| 0      | 0    | 47.17  | 84.635  | 45.77   | 93.715   | 0      | 0.02  | 28.875 | 3.015  | 0      | 9.985   | 3.31    |
| 0      | 0.18 | 97.76  | 34.79   | 15.285  | 1161.04  | 0      | 0     | 2.55   | 0      | 0      | 25.825  | 0.91    |
| 0      | 0    | 12.26  | 0       | 0       | 89.49    | 0      | 0     | 1.18   | 3.015  | 0      | 43.875  | 9.12    |
| 0      | 0    | 54.225 | 18.12   | 6.515   | 3643.645 | 0      | 0     | 0.26   | 13.1   | 0.365  | 132.795 | 32.895  |
| 0      | 0    | 48.935 | 9.055   | 21.025  | 2170.285 | 0      | 0     | 0.205  | 0      | 12.72  | 289.275 | 25.795  |
| 0      | 0    | 85.055 | 9.77    | 39.56   | 3087.62  | 0      | 0     | 2.2    | 0      | 0      | 34.885  | 12.93   |
| 0      | 0    | 37.19  | 9.2     | 10.08   | 1673.215 | 0      | 0     | 1.105  | 0      | 6.93   | 274.62  | 28.21   |
| 2.94   | 0    | 10.01  | 6.01    | 31.375  | 286.935  | 11.785 | 1.095 | 31.425 | 12.375 | 35.44  | 123.17  | 29.86   |
| 0      | 0    | 45.47  | 25.52   | 22.78   | 1015.13  | 22.985 | 3.065 | 18.67  | 0      | 2.97   | 24.48   | 107.085 |
| 2.575  | 0    | 12.42  | 5.74    | 39.615  | 185.8    | 5.66   | 0.37  | 15.375 | 0      | 13.02  | 67.135  | 10.77   |
| 20.505 | 0    | 20.67  | 7.025   | 22.78   | 180.17   | 11.785 | 1.495 | 48.525 | 43.68  | 61.47  | 128.73  | 32.5    |
| 11.67  | 0    | 8.965  | 4.605   | 20.07   | 388.645  | 5.66   | 1.015 | 42.355 | 34.555 | 73.925 | 77.945  | 41.735  |



| liver IL-2 | liver IL-4 | liver IL-5 | liver IL-6 | liver IL-10 | liver IL-12 ( | liver IL-12 ( | liver IL-13 | liver IL-17 | liver IP-10 | liver KC | liver MCP-1 |
|------------|------------|------------|------------|-------------|---------------|---------------|-------------|-------------|-------------|----------|-------------|
| Liver      | Liver      | Liver      | Liver      | Liver       | Liver         | Liver         | Liver       | Liver       | Liver       | Liver    | Liver       |

| liver IL-2 | liver IL-4 | liver IL-5 | liver IL-6 | liver IL-10 | liver IL-12 ( | liver IL-12 ( | liver IL-13 | liver IL-17 | liver IP-10 | liver KC | liver MCP-1 |
|------------|------------|------------|------------|-------------|---------------|---------------|-------------|-------------|-------------|----------|-------------|
| 12.695     | 1.75       | 1.31       | 107.14     | 12.695      | 13.145        | 9.265         | 29.115      | 1.765       | 79.56       | 12.285   | 13.36       |
| 12.335     | 1.695      | 1.285      | 284.68     | 9.355       | 4.645         | 1.085         | 18.56       | 1.39        | 873.925     | 906.83   | 265.935     |
| 0.97       | 1.71       | 1.405      | 305.89     | 9.755       | 10.9          | 9.035         | 43.135      | 1.715       | 3013.165    | 1118.325 | 606.905     |
| 61.855     | 1.4        | 1.935      | 403.77     | 87.065      | 94.225        | 8.14          | 422.14      | 1.545       | 5000.0      | 1117.6   | 795.24      |
| 66.965     | 0          | 9.325      | 300.14     | 192.235     | 93.375        | 9.19          | 251.625     | 9.06        | 983.065     | 735.2    | 234.09      |
| 11.785     | 1.07       | 0.295      | 168.83     | 13.76       | 10.7          | 0             | 0           | 0           | 1085.01     | 918.005  | 425.755     |
| 11.325     | 0          | 0          | 9.82       | 8.055       | 8.59          | 0             | 4.515       | 0.27        | 201.45      | 35.465   | 54.53       |
| 22.6       | 1.73       | 1.31       | 195.435    | 14.24       | 12.515        | 2.88          | 75.04       | 1.79        | 69.415      | 15.44    | 14.505      |
| 10.965     | 1.705      | 1.295      | 309.09     | 8.145       | 6.595         | 1.51          | 28.94       | 1.625       | 1915.56     | 1752.075 | 530.65      |
| 12.055     | 1.675      | 1.295      | 368.085    | 4.045       | 6.33          | 1.65          | 39.45       | 1.58        | 3485.66     | 1463.31  | 654.255     |
| 41.875     | 1.28       | 1.65       | 433.895    | 83.46       | 77.465        | 6.525         | 372.61      | 1.305       | 5000.0      | 1174.87  | 780.305     |
| 77.095     | 0          | 7.28       | 252.775    | 190.93      | 108.845       | 11.445        | 243.925     | 10.375      | 722.66      | 625.57   | 204.205     |
| 12.49      | 1.05       | 0.21       | 10.905     | 18.385      | 18.435        | 0             | 99.93       | 0           | 106.08      | 19.41    | 0           |
| 26.34      | 0          | 0          | 3.95       | 6.545       | 4.64          | 0             | 0           | 0.135       | 143.735     | 20.68    | 32.12       |
| 8.55       | 1.675      | 1.18       | 68.725     | 3.485       | 2.565         | 0             | 16.1        | 1.32        | 73.585      | 6.97     | 5.66        |
| 13.955     | 1.615      | 1.22       | 443.64     | 2.555       | 2.205         | 1.085         | 6.935       | 1.365       | 1309.06     | 1177.28  | 439.82      |
| 23.305     | 1.8        | 1.395      | 318.13     | 21.285      | 14.88         | 11.88         | 109.72      | 1.85        | 5797.21     | 2194.99  | 744.885     |
| 18.27      | 0          | 0          | 411.18     | 33.33       | 19.03         | 6.48          | 0.91        | 3.205       | 1942.56     | 1436.32  | 606.185     |
| 72.7       | 0          | 9.56       | 337.64     | 231.685     | 112.56        | 10.375        | 215.305     | 13.555      | 1864.985    | 1100.165 | 327.99      |
| 4.47       | 0          | 0          | 21.785     | 15.54       | 9.335         | 6.695         | 0           | 0           | 388.25      | 220.475  | 143.775     |
| 12.225     | 0          | 0          | 14.39      | 15.98       | 11.27         | 0             | 16.085      | 0.74        | 278.765     | 30.555   | 60.65       |
| 15.94      | 1.66       | 1.255      | 110.785    | 7.01        | 7.55          | 5.77          | 70.665      | 1.48        | 49.58       | 5.555    | 7.905       |
| 13.39      | 1.65       | 1.275      | 431.24     | 3.19        | 3.205         | 0.805         | 11.545      | 1.425       | 1153.73     | 1754.76  | 524.125     |
| 46.575     | 1.48       | 2.22       | 383.83     | 143.65      | 125.975       | 15.905        | 507.635     | 2.555       | 5000.0      | 1423.355 | 927.54      |
| 15.25      | 0          | 0          | 393.99     | 32.56       | 20.405        | 6.695         | 0           | 1.125       | 2121.405    | 1431.405 | 732.26      |
| 52.58      | 0          | 7.56       | 268.54     | 198.75      | 101.555       | 9.515         | 231.045     | 8.825       | 1070.335    | 929.615  | 289.485     |

|               |          |          |                |               |               |               |                |             |               |                |               |
|---------------|----------|----------|----------------|---------------|---------------|---------------|----------------|-------------|---------------|----------------|---------------|
| 2.385         | 0        | 0        | 17.07          | 7.49          | 4.155         | 5.6           | 0              | 0           | 325.07        | 155.75         | 152.025       |
| 17.045        | 0        | 0        | 13.72          | 17.43         | 17.32         | 0.975         | 14.595         | 0.7         | 242.885       | 55.58          | 55.2          |
| 50.11         | 1.28     | 0.915    | 113.605        | 77.165        | 83.615        | 2.445         | 349.725        | 0           | 269.185       | 147.115        | 68.71         |
| 49.72         | 1.32     | 2.08     | 352.785        | 69.995        | 68.84         | 8.14          | 331.24         | 0.535       | 891.22        | 1600.235       | 634.175       |
| 33.785        | 1.4      | 1.215    | 425.145        | 60.855        | 66.575        | 4.7           | 230.18         | 0.31        | 5000.0        | 1746.375       | 1311.335      |
| 23.11         | 0        | 0        | 23.24          | 49.125        | 20.86         | 7.135         | 38.365         | 0.59        | 456.19        | 63.845         | 50.88         |
| 35.66         | 0        | 0        | 204.575        | 44.03         | 51.68         | 43.625        | 137.69         | 3.025       | 4826.205      | 1603.325       | 546.16        |
| 3.235         | 0        | 0        | 310.655        | 3.875         | 0             | 5.49          | 0              | 0           | 1708.55       | 2228.375       | 529.91        |
| 7.63          | 0        | 0        | 1.735          | 6.465         | 4.145         | 0             | 0              | 0.165       | 107.425       | 12.385         | 22.355        |
| 60.94         | 1.47     | 2.5      | 465.89         | 145.49        | 113.425       | 56.84         | 611.18         | 2.645       | 978.545       | 1563.345       | 728.335       |
| 189.07        | 1.43     | 2.36     | 455.55         | 124.355       | 113.425       | 13.555        | 509.765        | 2.085       | 5000.0        | 1487.585       | 995           |
| 19.11         | 0        | 0        | 490.32         | 34.86         | 15.51         | 6.915         | 0              | 1.46        | 2675.325      | 1874.085       | 793.445       |
| 40.345        | 0        | 0        | 246.38         | 57.51         | 71.895        | 26.425        | 170.06         | 5.1         | 2074.35       | 1179.52        | 380.15        |
| <b>3.41</b>   | <b>0</b> | <b>0</b> | <b>207.775</b> | <b>5.355</b>  | <b>4.975</b>  | <b>0</b>      | <b>0</b>       | <b>0</b>    | <b>934.78</b> | <b>1742.42</b> | <b>290.57</b> |
| <b>27.135</b> | <b>0</b> | <b>0</b> | <b>57.45</b>   | <b>36.945</b> | <b>42.115</b> | <b>37.165</b> | <b>115.845</b> | <b>1.82</b> | <b>311.61</b> | <b>72.945</b>  | <b>94.975</b> |

| Liver  | Liver | Liver | Liver   | Liver  | Liver        | Liver        | Liver   | Liver  | Liver   | Liver   | Liver  |
|--------|-------|-------|---------|--------|--------------|--------------|---------|--------|---------|---------|--------|
| LIL-2  | LIL-4 | LIL-5 | LIL-6   | LIL-10 | LIL-12 (p40) | LIL-12 (p70) | LIL-13  | LIL-17 | LIP-10  | LKC     | LMCP-1 |
| 12.695 | 1.75  | 1.31  | 107.14  | 12.695 | 13.145       | 9.265        | 29.115  | 1.765  | 79.56   | 12.285  | 13.36  |
| 22.6   | 1.73  | 1.31  | 195.435 | 14.24  | 12.515       | 2.88         | 75.04   | 1.79   | 69.415  | 15.44   | 14.505 |
| 8.55   | 1.675 | 1.18  | 68.725  | 3.485  | 2.565        | 0            | 16.1    | 1.32   | 73.585  | 6.97    | 5.66   |
| 15.94  | 1.66  | 1.255 | 110.785 | 7.01   | 7.55         | 5.77         | 70.665  | 1.48   | 49.58   | 5.555   | 7.905  |
| 50.11  | 1.28  | 0.915 | 113.605 | 77.165 | 83.615       | 2.445        | 349.725 | 0      | 269.185 | 147.115 | 68.71  |

| LIL-2  | LIL-4 | LIL-5 | LIL-6  | LIL-10 | LIL-12 (p40) | LIL-12 (p70) | LIL-13 | LIL-17 | LIP-10   | LKC      | LMCP-1  |
|--------|-------|-------|--------|--------|--------------|--------------|--------|--------|----------|----------|---------|
| 12.335 | 1.695 | 1.285 | 284.68 | 9.355  | 4.645        | 1.085        | 18.56  | 1.39   | 873.925  | 906.83   | 265.935 |
| 0.97   | 1.71  | 1.405 | 305.89 | 9.755  | 10.9         | 9.035        | 43.135 | 1.715  | 3013.165 | 1118.325 | 606.905 |

|        |       |       |         |         |         |        |         |        |          |          |          |
|--------|-------|-------|---------|---------|---------|--------|---------|--------|----------|----------|----------|
| 61.855 | 1.4   | 1.935 | 403.77  | 87.065  | 94.225  | 8.14   | 422.14  | 1.545  | 5000.0   | 1117.6   | 795.24   |
| 66.965 | 0     | 9.325 | 300.14  | 192.235 | 93.375  | 9.19   | 251.625 | 9.06   | 983.065  | 735.2    | 234.09   |
| 11.785 | 1.07  | 0.295 | 168.83  | 13.76   | 10.7    | 0      | 0       | 0      | 1085.01  | 918.005  | 425.755  |
| 11.325 | 0     | 0     | 9.82    | 8.055   | 8.59    | 0      | 4.515   | 0.27   | 201.45   | 35.465   | 54.53    |
| 10.965 | 1.705 | 1.295 | 309.09  | 8.145   | 6.595   | 1.51   | 28.94   | 1.625  | 1915.56  | 1752.075 | 530.65   |
| 12.055 | 1.675 | 1.295 | 368.085 | 4.045   | 6.33    | 1.65   | 39.45   | 1.58   | 3485.66  | 1463.31  | 654.255  |
| 41.875 | 1.28  | 1.65  | 433.895 | 83.46   | 77.465  | 6.525  | 372.61  | 1.305  | 5000.0   | 1174.87  | 780.305  |
| 77.095 | 0     | 7.28  | 252.775 | 190.93  | 108.845 | 11.445 | 243.925 | 10.375 | 722.66   | 625.57   | 204.205  |
| 12.49  | 1.05  | 0.21  | 10.905  | 18.385  | 18.435  | 0      | 99.93   | 0      | 106.08   | 19.41    | 0        |
| 26.34  | 0     | 0     | 3.95    | 6.545   | 4.64    | 0      | 0       | 0.135  | 143.735  | 20.68    | 32.12    |
| 13.955 | 1.615 | 1.22  | 443.64  | 2.555   | 2.205   | 1.085  | 6.935   | 1.365  | 1309.06  | 1177.28  | 439.82   |
| 23.305 | 1.8   | 1.395 | 318.13  | 21.285  | 14.88   | 11.88  | 109.72  | 1.85   | 5797.21  | 2194.99  | 744.885  |
| 18.27  | 0     | 0     | 411.18  | 33.33   | 19.03   | 6.48   | 0.91    | 3.205  | 1942.56  | 1436.32  | 606.185  |
| 72.7   | 0     | 9.56  | 337.64  | 231.685 | 112.56  | 10.375 | 215.305 | 13.555 | 1864.985 | 1100.165 | 327.99   |
| 4.47   | 0     | 0     | 21.785  | 15.54   | 9.335   | 6.695  | 0       | 0      | 388.25   | 220.475  | 143.775  |
| 12.225 | 0     | 0     | 14.39   | 15.98   | 11.27   | 0      | 16.085  | 0.74   | 278.765  | 30.555   | 60.65    |
| 13.39  | 1.65  | 1.275 | 431.24  | 3.19    | 3.205   | 0.805  | 11.545  | 1.425  | 1153.73  | 1754.76  | 524.125  |
| 46.575 | 1.48  | 2.22  | 383.83  | 143.65  | 125.975 | 15.905 | 507.635 | 2.555  | 5000.0   | 1423.355 | 927.54   |
| 15.25  | 0     | 0     | 393.99  | 32.56   | 20.405  | 6.695  | 0       | 1.125  | 2121.405 | 1431.405 | 732.26   |
| 52.58  | 0     | 7.56  | 268.54  | 198.75  | 101.555 | 9.515  | 231.045 | 8.825  | 1070.335 | 929.615  | 289.485  |
| 2.385  | 0     | 0     | 17.07   | 7.49    | 4.155   | 5.6    | 0       | 0      | 325.07   | 155.75   | 152.025  |
| 17.045 | 0     | 0     | 13.72   | 17.43   | 17.32   | 0.975  | 14.595  | 0.7    | 242.885  | 55.58    | 55.2     |
| 49.72  | 1.32  | 2.08  | 352.785 | 69.995  | 68.84   | 8.14   | 331.24  | 0.535  | 891.22   | 1600.235 | 634.175  |
| 33.785 | 1.4   | 1.215 | 425.145 | 60.855  | 66.575  | 4.7    | 230.18  | 0.31   | 5000.0   | 1746.375 | 1311.335 |
| 23.11  | 0     | 0     | 23.24   | 49.125  | 20.86   | 7.135  | 38.365  | 0.59   | 456.19   | 63.845   | 50.88    |
| 35.66  | 0     | 0     | 204.575 | 44.03   | 51.68   | 43.625 | 137.69  | 3.025  | 4826.205 | 1603.325 | 546.16   |
| 3.235  | 0     | 0     | 310.655 | 3.875   | 0       | 5.49   | 0       | 0      | 1708.55  | 2228.375 | 529.91   |
| 7.63   | 0     | 0     | 1.735   | 6.465   | 4.145   | 0      | 0       | 0.165  | 107.425  | 12.385   | 22.355   |
| 60.94  | 1.47  | 2.5   | 465.89  | 145.49  | 113.425 | 56.84  | 611.18  | 2.645  | 978.545  | 1563.345 | 728.335  |

|               |          |          |                |               |               |               |                |             |               |                |               |
|---------------|----------|----------|----------------|---------------|---------------|---------------|----------------|-------------|---------------|----------------|---------------|
| 189.07        | 1.43     | 2.36     | 455.55         | 124.355       | 113.425       | 13.555        | 509.765        | 2.085       | 5000.0        | 1487.585       | 995           |
| 19.11         | 0        | 0        | 490.32         | 34.86         | 15.51         | 6.915         | 0              | 1.46        | 2675.325      | 1874.085       | 793.445       |
| 40.345        | 0        | 0        | 246.38         | 57.51         | 71.895        | 26.425        | 170.06         | 5.1         | 2074.35       | 1179.52        | 380.15        |
| <b>3.41</b>   | <b>0</b> | <b>0</b> | <b>207.775</b> | <b>5.355</b>  | <b>4.975</b>  | <b>0</b>      | <b>0</b>       | <b>0</b>    | <b>934.78</b> | <b>1742.42</b> | <b>290.57</b> |
| <b>27.135</b> | <b>0</b> | <b>0</b> | <b>57.45</b>   | <b>36.945</b> | <b>42.115</b> | <b>37.165</b> | <b>115.845</b> | <b>1.82</b> | <b>311.61</b> | <b>72.945</b>  | <b>94.975</b> |

liver IL-2   liver IL-4   liver IL-5   liver IL-6   liver IL-10   liver IL-12 (liver IL-12 (liver IL-13   liver IL-17   liver IP-10   liver KC   liver MCP-:

Liver   Liver

liver IL-2   liver IL-4   liver IL-5   liver IL-6   liver IL-10   liver IL-12 (liver IL-12 (liver IL-13   liver IL-17   liver IP-10   liver KC   liver MCP-:

|        |   |       |        |        |        |       |         |      |         |        |         |
|--------|---|-------|--------|--------|--------|-------|---------|------|---------|--------|---------|
| 83.725 | 0 | 0     | 267.52 | 49.58  | 53.36  | 9.64  | 182.345 | 3.21 | 116.835 | 19.08  | 23.015  |
| 34.905 | 0 | 0.445 | 121.1  | 42.97  | 53.925 | 40.03 | 167.895 | 2.84 | 608.22  | 664.86 | 113.225 |
| 0.36   | 0 | 0     | 11.095 | 4.6    | 0      | 0     | 0       | 0    | 495.14  | 181.33 | 108.135 |
| 1.075  | 0 | 0     | 19.535 | 6.055  | 0      | 0     | 0       | 0    | 214.435 | 123.04 | 30.895  |
| 1.76   | 0 | 0     | 7.13   | 6.81   | 0      | 0     | 0       | 0    | 121.72  | 33.815 | 34.855  |
| 41.055 | 0 | 0     | 63.615 | 33.34  | 17.46  | 0     | 2.755   | 0    | 29.25   | 46.225 | 27.41   |
| 28.76  | 0 | 0     | 50.07  | 30.665 | 17.98  | 0     | 3.475   | 0    | 59.52   | 28.575 | 25.2    |

|      |   |   |      |       |   |   |   |   |        |       |       |
|------|---|---|------|-------|---|---|---|---|--------|-------|-------|
| 0    | 0 | 0 | 0.49 | 1.49  | 0 | 0 | 0 | 0 | 78.495 | 11.18 | 3.785 |
| 0.06 | 0 | 0 | 0    | 1.915 | 0 | 0 | 0 | 0 | 75.48  | 2.14  | 0     |
| 0.14 | 0 | 0 | 0.31 | 2.885 | 0 | 0 | 0 | 0 | 47.74  | 2.985 | 0     |

|        |       |       |         |        |        |       |         |       |         |         |         |
|--------|-------|-------|---------|--------|--------|-------|---------|-------|---------|---------|---------|
| 48.03  | 1.43  | 2.08  | 173.645 | 81.885 | 72.635 | 37.51 | 497.165 | 2.115 | 674.735 | 1036.11 | 372.75  |
| 58.425 | 1.205 | 1.795 | 207.41  | 73.575 | 73.395 | 5.645 | 438.785 | 1.515 | 702.765 | 890.44  | 431.335 |
| 0.68   | 0     | 0     | 64.935  | 5.83   | 0      | 0     | 0       | 0     | 703.965 | 891.095 | 330.705 |

|       |   |   |        |       |   |   |   |   |         |         |         |
|-------|---|---|--------|-------|---|---|---|---|---------|---------|---------|
| 0.06  | 0 | 0 | 10.04  | 3.515 | 0 | 0 | 0 | 0 | 551.53  | 125.555 | 97.51   |
| 0.015 | 0 | 0 | 0.18   | 3.325 | 0 | 0 | 0 | 0 | 66.6    | 4.14    | 3.14    |
| 0     | 0 | 0 | 22.425 | 1.705 | 0 | 0 | 0 | 0 | 380.495 | 799.09  | 108.735 |

|       |   |   |       |       |   |   |   |   |        |       |        |
|-------|---|---|-------|-------|---|---|---|---|--------|-------|--------|
| 0.81  | 0 | 0 | 14.25 | 2.93  | 0 | 0 | 0 | 0 | 231.17 | 93.62 | 13.885 |
| 1.485 | 0 | 0 | 0.005 | 8.465 | 0 | 0 | 0 | 0 | 29.555 | 6.255 | 0      |

|       |   |   |       |        |   |   |       |   |        |        |        |
|-------|---|---|-------|--------|---|---|-------|---|--------|--------|--------|
| 8.835 | 0 | 0 | 20.05 | 34.295 | 0 | 0 | 0.495 | 0 | 196.37 | 93.845 | 27.775 |
|-------|---|---|-------|--------|---|---|-------|---|--------|--------|--------|

|       |   |   |       |        |   |   |   |   |         |        |        |
|-------|---|---|-------|--------|---|---|---|---|---------|--------|--------|
| 9.35  | 0 | 0 | 8.31  | 17.855 | 0 | 0 | 0 | 0 | 142.74  | 33.125 | 40.47  |
| 1.015 | 0 | 0 | 6.145 | 8.29   | 0 | 0 | 0 | 0 | 365.175 | 77.77  | 87.215 |
| 3.625 | 0 | 0 | 4.455 | 19.885 | 0 | 0 | 0 | 0 | 104.8   | 31.985 | 48.745 |

|        |   |   |        |       |        |   |       |   |        |        |        |
|--------|---|---|--------|-------|--------|---|-------|---|--------|--------|--------|
| 24.485 | 0 | 0 | 57.735 | 27.18 | 12.205 | 0 | 0     | 0 | 39.23  | 42.435 | 22.78  |
| 8.055  | 0 | 0 | 2.105  | 1.14  | 0      | 0 | 23.08 | 0 | 22.59  | 13.445 | 57.85  |
| 11.08  | 0 | 0 | 17.67  | 6.935 | 0.41   | 0 | 0     | 0 | 25.555 | 20.3   | 16.935 |

|        |   |   |        |       |        |   |       |   |        |        |       |
|--------|---|---|--------|-------|--------|---|-------|---|--------|--------|-------|
| 25.83  | 0 | 0 | 54.485 | 22.3  | 12.735 | 0 | 2.575 | 0 | 72.045 | 48.035 | 34.9  |
| 24.655 | 0 | 0 | 59.7   | 30.98 | 13.97  | 0 | 4.01  | 0 | 46.56  | 44.36  | 27.41 |

| Liver  | Liver | Liver | Liver  | Liver  | Liver        | Liver        | Liver   | Liver  | Liver   | Liver | Liver  |
|--------|-------|-------|--------|--------|--------------|--------------|---------|--------|---------|-------|--------|
| LIL-2  | LIL-4 | LIL-5 | LIL-6  | LIL-10 | LIL-12 (p40) | LIL-12 (p70) | LIL-13  | LIL-17 | LIP-10  | LKC   | LMCP-1 |
| 83.725 | 0     | 0     | 267.52 | 49.58  | 53.36        | 9.64         | 182.345 | 3.21   | 116.835 | 19.08 | 23.015 |
| 0      | 0     | 0     | 0.49   | 1.49   | 0            | 0            | 0       | 0      | 78.495  | 11.18 | 3.785  |
| 0.06   | 0     | 0     | 0      | 1.915  | 0            | 0            | 0       | 0      | 75.48   | 2.14  | 0      |
| 0.14   | 0     | 0     | 0.31   | 2.885  | 0            | 0            | 0       | 0      | 47.74   | 2.985 | 0      |

| LIL-2  | LIL-4 | LIL-5 | LIL-6  | LIL-10 | LIL-12 (p40) | LIL-12 (p70) | LIL-13  | LIL-17 | LIP-10  | LKC    | LMCP-1  |
|--------|-------|-------|--------|--------|--------------|--------------|---------|--------|---------|--------|---------|
| 34.905 | 0     | 0.445 | 121.1  | 42.97  | 53.925       | 40.03        | 167.895 | 2.84   | 608.22  | 664.86 | 113.225 |
| 0.36   | 0     | 0     | 11.095 | 4.6    | 0            | 0            | 0       | 0      | 495.14  | 181.33 | 108.135 |
| 1.075  | 0     | 0     | 19.535 | 6.055  | 0            | 0            | 0       | 0      | 214.435 | 123.04 | 30.895  |
| 1.76   | 0     | 0     | 7.13   | 6.81   | 0            | 0            | 0       | 0      | 121.72  | 33.815 | 34.855  |
| 41.055 | 0     | 0     | 63.615 | 33.34  | 17.46        | 0            | 2.755   | 0      | 29.25   | 46.225 | 27.41   |
| 28.76  | 0     | 0     | 50.07  | 30.665 | 17.98        | 0            | 3.475   | 0      | 59.52   | 28.575 | 25.2    |

|       |      |      |         |        |        |       |         |       |         |         |        |
|-------|------|------|---------|--------|--------|-------|---------|-------|---------|---------|--------|
| 48.03 | 1.43 | 2.08 | 173.645 | 81.885 | 72.635 | 37.51 | 497.165 | 2.115 | 674.735 | 1036.11 | 372.75 |
|-------|------|------|---------|--------|--------|-------|---------|-------|---------|---------|--------|

|        |       |       |        |        |        |       |         |       |         |         |         |
|--------|-------|-------|--------|--------|--------|-------|---------|-------|---------|---------|---------|
| 58.425 | 1.205 | 1.795 | 207.41 | 73.575 | 73.395 | 5.645 | 438.785 | 1.515 | 702.765 | 890.44  | 431.335 |
| 0.68   | 0     | 0     | 64.935 | 5.83   | 0      | 0     | 0       | 0     | 703.965 | 891.095 | 330.705 |
| 0.06   | 0     | 0     | 10.04  | 3.515  | 0      | 0     | 0       | 0     | 551.53  | 125.555 | 97.51   |
| 0.015  | 0     | 0     | 0.18   | 3.325  | 0      | 0     | 0       | 0     | 66.6    | 4.14    | 3.14    |
| 0      | 0     | 0     | 22.425 | 1.705  | 0      | 0     | 0       | 0     | 380.495 | 799.09  | 108.735 |
| 0.81   | 0     | 0     | 14.25  | 2.93   | 0      | 0     | 0       | 0     | 231.17  | 93.62   | 13.885  |
| 1.485  | 0     | 0     | 0.005  | 8.465  | 0      | 0     | 0       | 0     | 29.555  | 6.255   | 0       |
| 8.835  | 0     | 0     | 20.05  | 34.295 | 0      | 0     | 0.495   | 0     | 196.37  | 93.845  | 27.775  |
| 9.35   | 0     | 0     | 8.31   | 17.855 | 0      | 0     | 0       | 0     | 142.74  | 33.125  | 40.47   |
| 1.015  | 0     | 0     | 6.145  | 8.29   | 0      | 0     | 0       | 0     | 365.175 | 77.77   | 87.215  |
| 3.625  | 0     | 0     | 4.455  | 19.885 | 0      | 0     | 0       | 0     | 104.8   | 31.985  | 48.745  |
| 24.485 | 0     | 0     | 57.735 | 27.18  | 12.205 | 0     | 0       | 0     | 39.23   | 42.435  | 22.78   |
| 8.055  | 0     | 0     | 2.105  | 1.14   | 0      | 0     | 23.08   | 0     | 22.59   | 13.445  | 57.85   |
| 11.08  | 0     | 0     | 17.67  | 6.935  | 0.41   | 0     | 0       | 0     | 25.555  | 20.3    | 16.935  |
| 25.83  | 0     | 0     | 54.485 | 22.3   | 12.735 | 0     | 2.575   | 0     | 72.045  | 48.035  | 34.9    |
| 24.655 | 0     | 0     | 59.7   | 30.98  | 13.97  | 0     | 4.01    | 0     | 46.56   | 44.36   | 27.41   |

| liver MIG | liver MIP-1 | liver TNFa | liver VEGF | lung GM-CS | lung IFN-g | lung IL-1a | lung IL-1b | lung IL-2 | lung IL-4 | lung IL-5 | lung IL-6 | lung IL-10 |
|-----------|-------------|------------|------------|------------|------------|------------|------------|-----------|-----------|-----------|-----------|------------|
| Liver     | Liver       | Liver      | Liver      | Lung       | Lung       | Lung       | Lung       | Lung      | Lung      | Lung      | Lung      | Lung       |

liver MIG liver MIP-1 liver TNFa liver VEGF lung GM-CS lung IFN-g lung IL-1a lung IL-1b lung IL-2 lung IL-4 lung IL-5 lung IL-6 lung IL-10

|          |         |       |        |        |        |          |         |        |       |        |          |        |
|----------|---------|-------|--------|--------|--------|----------|---------|--------|-------|--------|----------|--------|
| 1240.805 | 21.835  | 2.345 | 11.105 | 2.255  | 3.755  | 15.595   | 15.975  | 1.43   | 1.59  | 1.245  | 13.45    | 4.085  |
| 500.86   | 101.64  | 6.145 | 16.235 | 2.255  | 13.66  | 26.095   | 27.12   | 1.905  | 1.61  | 1.285  | 33.79    | 1.57   |
| 636.03   | 131.275 | 2.68  | 66.56  | 44.8   | 11.29  | 2607.165 | 196.045 | 3.975  | 2.04  | 2.13   | 1311.715 | 2.065  |
| 24877.6  | 136.08  | 4.8   | 71.745 | 89.5   | 103.48 | 77.605   | 121.445 | 12.275 | 1.32  | 10.235 | 734.62   | 15.645 |
| 22265.9  | 70.185  | 6.45  | 63.13  | 40.185 | 36.355 | 51.32    | 0       | 13.255 | 0     | 5.075  | 739.96   | 30.25  |
| 13663.32 | 64.185  | 0.97  | 71.01  | 22.02  | 53.41  | 60.21    | 27.465  | 7.855  | 1.07  | 0      | 436.285  | 12.09  |
| 1824.88  | 13.005  | 0     | 5.49   | 0      | 21.405 | 41.135   | 14.355  | 2.205  | 0     | 0      | 34.5     | 1.19   |
| 1017.09  | 19.35   | 2.265 | 17.465 | 0      | 4.61   | 14       | 11.355  | 1.31   | 1.57  | 1.22   | 7.675    | 4      |
| 1108.985 | 89.11   | 7.855 | 17.465 | 18.08  | 12.315 | 26.705   | 17.705  | 3.765  | 1.715 | 1.295  | 282.765  | 1.555  |
| 3334.575 | 188.6   | 2.465 | 51.155 | 48.94  | 9.615  | 32.84    | 87.95   | 1.505  | 1.82  | 3.015  | 1782.12  | 1.535  |
| 24877.6  | 117.235 | 4.235 | 79.115 | 67.27  | 40.36  | 32.145   | 62.38   | 6.19   | 1.09  | 3.665  | 461.035  | 7.155  |
| 22265.9  | 88.595  | 7.16  | 63.5   | 22.615 | 38.825 | 55.97    | 0       | 14.375 | 0     | 0      | 349.215  | 6.605  |
| 4761.805 | 16.75   | 1.385 | 11.015 | 0      | 52.01  | 64.055   | 14.46   | 6.09   | 1.105 | 0.765  | 11.05    | 37.735 |
| 1289.96  | 8.025   | 0     | 7.7    | 0      | 9.25   | 46.495   | 16.565  | 3.24   | 0     | 0      | 14.365   | 0.805  |
| 762.265  | 4.975   | 2.09  | 10.585 | 0      | 4.54   | 14.7     | 13.155  | 1.565  | 1.575 | 1.275  | 7.085    | 3.485  |
| 514.81   | 117.05  | 6.455 | 16.285 | 16.18  | 10.455 | 24.735   | 20.445  | 2.51   | 1.705 | 1.33   | 174.34   | 2.455  |
| 4181.37  | 143.59  | 2.845 | 51.305 | 45.62  | 8.68   | 23.635   | 53.52   | 1.885  | 1.73  | 3.4    | 1647.9   | 1.57   |
| 7957.565 | 55.585  | 0     | 73.86  | 60.235 | 38.93  | 46.145   | 75.53   | 10.22  | 0     | 13.43  | 1105.455 | 39.415 |
| 14630.66 | 88.18   | 6.545 | 67.5   | 44.595 | 53.72  | 56.645   | 0       | 15.21  | 0     | 6.995  | 978.05   | 45.415 |
| 9064.32  | 27.29   | 0     | 23.38  | 45.29  | 17.57  | 23.96    | 30.8594 | 0      | 0     | 0      | 147.275  | 25.965 |
| 2327.3   | 26.38   | 0     | 7.705  | 2.835  | 86.555 | 74.875   | 15.1    | 17.985 | 0     | 0      | 24.245   | 12.37  |
| 517.225  | 12.685  | 2.21  | 17.755 | 1.395  | 16.97  | 25.245   | 15.275  | 2.48   | 1.6   | 1.2    | 10.22    | 5.885  |
| 569.385  | 136     | 8.32  | 11.21  | 18.08  | 13.96  | 27.105   | 28.43   | 2.825  | 1.73  | 1.295  | 180.61   | 1.685  |
| 24877.6  | 196.635 | 7.685 | 85.42  | 100.09 | 99.915 | 99.165   | 186.555 | 19.105 | 1.24  | 2.775  | 1314.605 | 13.76  |
| 10817.42 | 50.335  | 3.2   | 94.45  | 36.97  | 81.13  | 155.275  | 66.2423 | 19.24  | 0     | 9.325  | 716.98   | 18.4   |
| 10593.14 | 86.92   | 6.265 | 67.235 | 45.975 | 73.905 | 62.795   | 11.6283 | 19.295 | 0     | 4.105  | 973.82   | 58.665 |

|                 |               |          |               |               |               |               |                |              |          |          |               |              |
|-----------------|---------------|----------|---------------|---------------|---------------|---------------|----------------|--------------|----------|----------|---------------|--------------|
| 6699.22         | 27.29         | 0        | 15.2          | 19.79         | 12.885        | 19.475        | 425.292        | 0            | 0        | 0        | 114.61        | 9.235        |
| 2435.34         | 26.38         | 0        | 9.825         | 0             | 32.265        | 42.17         | 14.355         | 5.64         | 0        | 0        | 54.335        | 3.855        |
| 586.77          | 70.195        | 2.48     | 29.575        | 22.02         | 69.375        | 85.685        | 24.04          | 15.215       | 1.07     | 0.125    | 17.12         | 31.225       |
| 768.49          | 191.945       | 28.89    | 19.435        | 69.82         | 63.375        | 58.19         | 73.735         | 11.175       | 1.28     | 0.915    | 127.415       | 14.385       |
| 24877.64        | 283.235       | 7.01     | 76.36         | 99.33         | 32.255        | 43.875        | 223.155        | 5.565        | 1.38     | 2.57     | 1030.785      | 9.61         |
| 8166.815        | 31.4          | 0        | 24.585        | 33.47         | 209.965       | 1006.24       | 125.413        | 43.98        | 0        | 11.61    | 45.08         | 37.145       |
| 9879.13         | 119.9         | 1.95     | 59.6          | 24.2          | 16.88         | 24.265        | 51.705         | 1.045        | 0        | 0        | 623.715       | 0.345        |
| 9042.265        | 34.65         | 0        | 93.43         | 29.585        | 11.86         | 29.925        | 58.1498        | 0            | 0        | 0        | 1408.625      | 22.41        |
| 1057.91         | 8.025         | 0        | 5.67          | 0             | 65.26         | 172.785       | 14.355         | 18.49        | 0        | 0        | 15.37         | 2.205        |
| 804.335         | 173.375       | 25.515   | 25.27         | 47.77         | 26.035        | 43.345        | 45.945         | 7.69         | 1.165    | 0.455    | 160.185       | 10.85        |
| <b>24877.6</b>  | 168.12        | 5.5      | 48.335        | 92.095        | 110.63        | 128.025       | 113.58         | 24.89        | 1.32     | 2.5      | 1306.005      | 15.435       |
| 9890.885        | 234.445       | 3.51     | 85.4          | 43.17         | 56.12         | 67.85         | 328.8543       | 13.78        | 0        | 3.89     | 1258.7        | 15.13        |
| 8830.74         | 106.13        | 2.685    | 88.42         | 6.795         | 66.575        | 57.345        | 40             | 13.53        | 0        | 0        | 852.915       | 0.65         |
| <b>7249.625</b> | <b>17.38</b>  | <b>0</b> | <b>122.42</b> | <b>21.115</b> | <b>16.465</b> | <b>36.465</b> | <b>65.8024</b> | <b>3.105</b> | <b>0</b> | <b>0</b> | <b>403.06</b> | <b>2.675</b> |
| <b>3384.305</b> | <b>73.085</b> | <b>0</b> | <b>11.535</b> | <b>0</b>      | <b>49.455</b> | <b>41.21</b>  | <b>19.465</b>  | <b>2.73</b>  | <b>0</b> | <b>0</b> | <b>50.985</b> | <b>0.96</b>  |

| Liver    | Liver   | Liver | Liver  | Lung    | Lung   | Lung   | Lung   | Lung   | Lung  | Lung  | Lung  | Lung   |
|----------|---------|-------|--------|---------|--------|--------|--------|--------|-------|-------|-------|--------|
| LMIG     | LMIP-1a | LTNFa | LVEGF  | UGM-CSF | UIFN-g | UIL-1a | UIL-1b | UIL-2  | UIL-4 | UIL-5 | UIL-6 | UIL-10 |
| 1240.805 | 21.835  | 2.345 | 11.105 | 2.255   | 3.755  | 15.595 | 15.975 | 1.43   | 1.59  | 1.245 | 13.45 | 4.085  |
| 1017.09  | 19.35   | 2.265 | 17.465 | 0       | 4.61   | 14     | 11.355 | 1.31   | 1.57  | 1.22  | 7.675 | 4      |
| 762.265  | 4.975   | 2.09  | 10.585 | 0       | 4.54   | 14.7   | 13.155 | 1.565  | 1.575 | 1.275 | 7.085 | 3.485  |
| 517.225  | 12.685  | 2.21  | 17.755 | 1.395   | 16.97  | 25.245 | 15.275 | 2.48   | 1.6   | 1.2   | 10.22 | 5.885  |
| 586.77   | 70.195  | 2.48  | 29.575 | 22.02   | 69.375 | 85.685 | 24.04  | 15.215 | 1.07  | 0.125 | 17.12 | 31.225 |

| LMIG   | LMIP-1a | LTNFa | LVEGF  | UGM-CSF | UIFN-g | UIL-1a   | UIL-1b  | UIL-2 | UIL-4 | UIL-5 | UIL-6    | UIL-10 |
|--------|---------|-------|--------|---------|--------|----------|---------|-------|-------|-------|----------|--------|
| 500.86 | 101.64  | 6.145 | 16.235 | 2.255   | 13.66  | 26.095   | 27.12   | 1.905 | 1.61  | 1.285 | 33.79    | 1.57   |
| 636.03 | 131.275 | 2.68  | 66.56  | 44.8    | 11.29  | 2607.165 | 196.045 | 3.975 | 2.04  | 2.13  | 1311.715 | 2.065  |



|          |         |        |        |        |         |         |         |        |       |        |          |        |
|----------|---------|--------|--------|--------|---------|---------|---------|--------|-------|--------|----------|--------|
| 24877.6  | 136.08  | 4.8    | 71.745 | 89.5   | 103.48  | 77.605  | 121.445 | 12.275 | 1.32  | 10.235 | 734.62   | 15.645 |
| 22265.9  | 70.185  | 6.45   | 63.13  | 40.185 | 36.355  | 51.32   | 0       | 13.255 | 0     | 5.075  | 739.96   | 30.25  |
| 13663.32 | 64.185  | 0.97   | 71.01  | 22.02  | 53.41   | 60.21   | 27.465  | 7.855  | 1.07  | 0      | 436.285  | 12.09  |
| 1824.88  | 13.005  | 0      | 5.49   | 0      | 21.405  | 41.135  | 14.355  | 2.205  | 0     | 0      | 34.5     | 1.19   |
| 1108.985 | 89.11   | 7.855  | 17.465 | 18.08  | 12.315  | 26.705  | 17.705  | 3.765  | 1.715 | 1.295  | 282.765  | 1.555  |
| 3334.575 | 188.6   | 2.465  | 51.155 | 48.94  | 9.615   | 32.84   | 87.95   | 1.505  | 1.82  | 3.015  | 1782.12  | 1.535  |
| 24877.6  | 117.235 | 4.235  | 79.115 | 67.27  | 40.36   | 32.145  | 62.38   | 6.19   | 1.09  | 3.665  | 461.035  | 7.155  |
| 22265.9  | 88.595  | 7.16   | 63.5   | 22.615 | 38.825  | 55.97   | 0       | 14.375 | 0     | 0      | 349.215  | 6.605  |
| 4761.805 | 16.75   | 1.385  | 11.015 | 0      | 52.01   | 64.055  | 14.46   | 6.09   | 1.105 | 0.765  | 11.05    | 37.735 |
| 1289.96  | 8.025   | 0      | 7.7    | 0      | 9.25    | 46.495  | 16.565  | 3.24   | 0     | 0      | 14.365   | 0.805  |
| 514.81   | 117.05  | 6.455  | 16.285 | 16.18  | 10.455  | 24.735  | 20.445  | 2.51   | 1.705 | 1.33   | 174.34   | 2.455  |
| 4181.37  | 143.59  | 2.845  | 51.305 | 45.62  | 8.68    | 23.635  | 53.52   | 1.885  | 1.73  | 3.4    | 1647.9   | 1.57   |
| 7957.565 | 55.585  | 0      | 73.86  | 60.235 | 38.93   | 46.145  | 75.53   | 10.22  | 0     | 13.43  | 1105.455 | 39.415 |
| 14630.66 | 88.18   | 6.545  | 67.5   | 44.595 | 53.72   | 56.645  | 0       | 15.21  | 0     | 6.995  | 978.05   | 45.415 |
| 9064.32  | 27.29   | 0      | 23.38  | 45.29  | 17.57   | 23.96   | 30.8594 | 0      | 0     | 0      | 147.275  | 25.965 |
| 2327.3   | 26.38   | 0      | 7.705  | 2.835  | 86.555  | 74.875  | 15.1    | 17.985 | 0     | 0      | 24.245   | 12.37  |
| 569.385  | 136     | 8.32   | 11.21  | 18.08  | 13.96   | 27.105  | 28.43   | 2.825  | 1.73  | 1.295  | 180.61   | 1.685  |
| 24877.6  | 196.635 | 7.685  | 85.42  | 100.09 | 99.915  | 99.165  | 186.555 | 19.105 | 1.24  | 2.775  | 1314.605 | 13.76  |
| 10817.42 | 50.335  | 3.2    | 94.45  | 36.97  | 81.13   | 155.275 | 66.2423 | 19.24  | 0     | 9.325  | 716.98   | 18.4   |
| 10593.14 | 86.92   | 6.265  | 67.235 | 45.975 | 73.905  | 62.795  | 11.6283 | 19.295 | 0     | 4.105  | 973.82   | 58.665 |
| 6699.22  | 27.29   | 0      | 15.2   | 19.79  | 12.885  | 19.475  | 425.292 | 0      | 0     | 0      | 114.61   | 9.235  |
| 2435.34  | 26.38   | 0      | 9.825  | 0      | 32.265  | 42.17   | 14.355  | 5.64   | 0     | 0      | 54.335   | 3.855  |
| 768.49   | 191.945 | 28.89  | 19.435 | 69.82  | 63.375  | 58.19   | 73.735  | 11.175 | 1.28  | 0.915  | 127.415  | 14.385 |
| 24877.64 | 283.235 | 7.01   | 76.36  | 99.33  | 32.255  | 43.875  | 223.155 | 5.565  | 1.38  | 2.57   | 1030.785 | 9.61   |
| 8166.815 | 31.4    | 0      | 24.585 | 33.47  | 209.965 | 1006.24 | 125.413 | 43.98  | 0     | 11.61  | 45.08    | 37.145 |
| 9879.13  | 119.9   | 1.95   | 59.6   | 24.2   | 16.88   | 24.265  | 51.705  | 1.045  | 0     | 0      | 623.715  | 0.345  |
| 9042.265 | 34.65   | 0      | 93.43  | 29.585 | 11.86   | 29.925  | 58.1498 | 0      | 0     | 0      | 1408.625 | 22.41  |
| 1057.91  | 8.025   | 0      | 5.67   | 0      | 65.26   | 172.785 | 14.355  | 18.49  | 0     | 0      | 15.37    | 2.205  |
| 804.335  | 173.375 | 25.515 | 25.27  | 47.77  | 26.035  | 43.345  | 45.945  | 7.69   | 1.165 | 0.455  | 160.185  | 10.85  |

|          |         |       |        |        |        |         |          |       |      |      |          |        |
|----------|---------|-------|--------|--------|--------|---------|----------|-------|------|------|----------|--------|
| 24877.6  | 168.12  | 5.5   | 48.335 | 92.095 | 110.63 | 128.025 | 113.58   | 24.89 | 1.32 | 2.5  | 1306.005 | 15.435 |
| 9890.885 | 234.445 | 3.51  | 85.4   | 43.17  | 56.12  | 67.85   | 328.8543 | 13.78 | 0    | 3.89 | 1258.7   | 15.13  |
| 8830.74  | 106.13  | 2.685 | 88.42  | 6.795  | 66.575 | 57.345  | 40       | 13.53 | 0    | 0    | 852.915  | 0.65   |
| 7249.625 | 17.38   | 0     | 122.42 | 21.115 | 16.465 | 36.465  | 65.8024  | 3.105 | 0    | 0    | 403.06   | 2.675  |
| 3384.305 | 73.085  | 0     | 11.535 | 0      | 49.455 | 41.21   | 19.465   | 2.73  | 0    | 0    | 50.985   | 0.96   |

liver MIG   liver MIP-1   liver TNFa   liver VEGF   ung GM-CS   lung IFN-g   lung IL-1a   lung IL-1b   lung IL-2   lung IL-4   lung IL-5   lung IL-6   lung IL-10  
 Liver   Liver   Liver   Liver   Lung   Lung   Lung   Lung   Lung   Lung   Lung   Lung   Lung

liver MIG   liver MIP-1   liver TNFa   liver VEGF   ung GM-CS   lung IFN-g   lung IL-1a   lung IL-1b   lung IL-2   lung IL-4   lung IL-5   lung IL-6   lung IL-10

|         |        |       |        |        |       |        |         |        |   |   |        |       |
|---------|--------|-------|--------|--------|-------|--------|---------|--------|---|---|--------|-------|
| 2972.84 | 87.775 | 0.72  | 16.42  | 0      | 28.69 | 31.385 | 21.6    | 3.91   | 0 | 0 | 10.48  | 1.89  |
| 2329.1  | 90.14  | 3.815 | 14.85  | 6.795  | 32.96 | 35.66  | 31.3    | 5.165  | 0 | 0 | 98.535 | 0.045 |
| 7531.65 | 24.415 | 0     | 15.735 | 9.31   | 0     | 20.85  | 5.735   | 0.03   | 0 | 0 | 32.035 | 4.37  |
| 7531.65 | 0      | 0     | 5.3    | 6.81   | 2.735 | 34.405 | 5.735   | 1.37   | 0 | 0 | 16.605 | 3.225 |
| 7531.65 | 0      | 0     | 11.045 | 0      | 0     | 16.485 | 3.825   | 0.045  | 0 | 0 | 12.005 | 2.93  |
| 641.97  | 92.34  | 2.275 | 9.29   | 0      | 1.57  | 48.05  | 73.335  | 15.43  | 0 | 0 | 2.5    | 2.655 |
| 242.795 | 28.595 | 2.39  | 39.76  | 12.375 | 9.145 | 48.8   | 151.735 | 20.385 | 0 | 0 | 5.215  | 1.715 |

|         |   |   |        |       |   |       |      |      |   |   |       |       |
|---------|---|---|--------|-------|---|-------|------|------|---|---|-------|-------|
| 258.035 | 0 | 0 | 10.17  | 3.015 | 0 | 20.85 | 0.51 | 0    | 0 | 0 | 2.125 | 27.47 |
| 211.48  | 0 | 0 | 10.505 | 0     | 0 | 5.755 | 0    | 0.18 | 0 | 0 | 0.3   | 5.105 |
| 115.315 | 0 | 0 | 6.695  | 0     | 0 | 3.81  | 0    | 0    | 0 | 0 | 0.735 | 2.02  |

|         |        |       |        |       |        |        |        |        |      |       |        |       |
|---------|--------|-------|--------|-------|--------|--------|--------|--------|------|-------|--------|-------|
| 519.215 | 109.68 | 6.465 | 16.295 | 0     | 29.025 | 28.585 | 86.59  | 5.38   | 1.09 | 0.295 | 42.395 | 4.935 |
| 675.2   | 99.535 | 5.915 | 16.775 | 0     | 80.115 | 78.895 | 187.32 | 13.085 | 1.05 | 0.295 | 57.94  | 5.135 |
| 219.195 | 13.62  | 0.755 | 5.49   | 5.215 | 0      | 8.53   | 18.485 | 0.095  | 0    | 0     | 57.63  | 4.46  |

|          |       |      |        |   |   |        |       |       |   |   |        |       |
|----------|-------|------|--------|---|---|--------|-------|-------|---|---|--------|-------|
| 4706.28  | 17.54 | 0.01 | 18.225 | 0 | 0 | 12.145 | 0     | 0.225 | 0 | 0 | 10.1   | 1.705 |
| 736.42   | 0     | 0    | 7.34   | 0 | 0 | 25.885 | 0     | 0.185 | 0 | 0 | 1      | 2.535 |
| 4885.775 | 0     | 0    | 5.42   | 0 | 0 | 8.705  | 2.205 | 0.12  | 0 | 0 | 28.735 | 3.325 |

|         |   |   |       |   |     |        |      |       |   |   |        |       |
|---------|---|---|-------|---|-----|--------|------|-------|---|---|--------|-------|
| 3482.65 | 0 | 0 | 2.53  | 0 | 0   | 32.14  | 6.62 | 1.01  | 0 | 0 | 16.825 | 8.465 |
| 1950.29 | 0 | 0 | 6.165 | 0 | 5.7 | 255.42 | 8.31 | 13.39 | 0 | 0 | 0.045  | 7.03  |

|         |        |       |      |   |     |        |      |      |   |   |       |       |
|---------|--------|-------|------|---|-----|--------|------|------|---|---|-------|-------|
| 7531.65 | 24.415 | 0.195 | 4.81 | 0 | 1.9 | 54.345 | 5.04 | 1.43 | 0 | 0 | 14.66 | 6.455 |
|---------|--------|-------|------|---|-----|--------|------|------|---|---|-------|-------|

|         |        |     |        |   |   |        |       |       |   |   |        |       |
|---------|--------|-----|--------|---|---|--------|-------|-------|---|---|--------|-------|
| 7531.65 | 18.67  | 0   | 12.385 | 0 | 0 | 27.015 | 2.205 | 0.255 | 0 | 0 | 13.72  | 3.71  |
| 7531.65 | 0      | 0   | 21.22  | 0 | 0 | 9.23   | 0     | 0.14  | 0 | 0 | 17.395 | 1.04  |
| 7531.65 | 16.335 | 0.1 | 16.085 | 0 | 0 | 19.02  | 0     | 0.265 | 0 | 0 | 15.8   | 0.805 |

|         |        |       |       |        |       |        |         |        |   |   |       |      |
|---------|--------|-------|-------|--------|-------|--------|---------|--------|---|---|-------|------|
| 424.895 | 28.595 | 3.4   | 12.75 | 12.375 | 2.75  | 33.93  | 148.875 | 27.54  | 0 | 0 | 4.86  | 1.04 |
| 121.285 | 11.785 | 1.695 | 30.05 | 0      | 3.4   | 31.345 | 171.53  | 23.42  | 0 | 0 | 3.145 | 3.02 |
| 500.9   | 5.66   | 0.72  | 14.12 | 12.375 | 3.185 | 34.83  | 228.63  | 26.715 | 0 | 0 | 3.21  | 3.75 |

|         |        |       |        |       |       |        |         |       |   |   |      |      |
|---------|--------|-------|--------|-------|-------|--------|---------|-------|---|---|------|------|
| 466.74  | 40.025 | 2.84  | 24.915 | 0     | 4.225 | 38.865 | 111.315 | 20.65 | 0 | 0 | 3.52 | 3.57 |
| 270.075 | 35.77  | 2.045 | 24.72  | 17.21 | 4.625 | 43.945 | 201.705 | 38.85 | 0 | 0 | 4.38 | 3.57 |

| Pg/Mg   |         |       |        |         |        |        |        |       |       |       |       |        |
|---------|---------|-------|--------|---------|--------|--------|--------|-------|-------|-------|-------|--------|
| Liver   | Liver   | Liver | Liver  | Lung    | Lung   | Lung   | Lung   | Lung  | Lung  | Lung  | Lung  | Lung   |
| LMIG    | LMIP-1a | LTNFa | LVEGF  | UGM-CSF | UIFN-g | UIL-1a | UIL-1b | UIL-2 | UIL-4 | UIL-5 | UIL-6 | UIL-10 |
| 2972.84 | 87.775  | 0.72  | 16.42  | 0       | 28.69  | 31.385 | 21.6   | 3.91  | 0     | 0     | 10.48 | 1.89   |
| 258.035 | 0       | 0     | 10.17  | 3.015   | 0      | 20.85  | 0.51   | 0     | 0     | 0     | 2.125 | 27.47  |
| 211.48  | 0       | 0     | 10.505 | 0       | 0      | 5.755  | 0      | 0.18  | 0     | 0     | 0.3   | 5.105  |
| 115.315 | 0       | 0     | 6.695  | 0       | 0      | 3.81   | 0      | 0     | 0     | 0     | 0.735 | 2.02   |

| LMIG    | LMIP-1a | LTNFa | LVEGF  | UGM-CSF | UIFN-g | UIL-1a | UIL-1b  | UIL-2  | UIL-4 | UIL-5 | UIL-6  | UIL-10 |
|---------|---------|-------|--------|---------|--------|--------|---------|--------|-------|-------|--------|--------|
| 2329.1  | 90.14   | 3.815 | 14.85  | 6.795   | 32.96  | 35.66  | 31.3    | 5.165  | 0     | 0     | 98.535 | 0.045  |
| 7531.65 | 24.415  | 0     | 15.735 | 9.31    | 0      | 20.85  | 5.735   | 0.03   | 0     | 0     | 32.035 | 4.37   |
| 7531.65 | 0       | 0     | 5.3    | 6.81    | 2.735  | 34.405 | 5.735   | 1.37   | 0     | 0     | 16.605 | 3.225  |
| 7531.65 | 0       | 0     | 11.045 | 0       | 0      | 16.485 | 3.825   | 0.045  | 0     | 0     | 12.005 | 2.93   |
| 641.97  | 92.34   | 2.275 | 9.29   | 0       | 1.57   | 48.05  | 73.335  | 15.43  | 0     | 0     | 2.5    | 2.655  |
| 242.795 | 28.595  | 2.39  | 39.76  | 12.375  | 9.145  | 48.8   | 151.735 | 20.385 | 0     | 0     | 5.215  | 1.715  |

|         |        |       |        |   |        |        |       |      |      |       |        |       |
|---------|--------|-------|--------|---|--------|--------|-------|------|------|-------|--------|-------|
| 519.215 | 109.68 | 6.465 | 16.295 | 0 | 29.025 | 28.585 | 86.59 | 5.38 | 1.09 | 0.295 | 42.395 | 4.935 |
|---------|--------|-------|--------|---|--------|--------|-------|------|------|-------|--------|-------|

|          |        |       |        |        |        |        |         |        |      |       |        |       |
|----------|--------|-------|--------|--------|--------|--------|---------|--------|------|-------|--------|-------|
| 675.2    | 99.535 | 5.915 | 16.775 | 0      | 80.115 | 78.895 | 187.32  | 13.085 | 1.05 | 0.295 | 57.94  | 5.135 |
| 219.195  | 13.62  | 0.755 | 5.49   | 5.215  | 0      | 8.53   | 18.485  | 0.095  | 0    | 0     | 57.63  | 4.46  |
| 4706.28  | 17.54  | 0.01  | 18.225 | 0      | 0      | 12.145 | 0       | 0.225  | 0    | 0     | 10.1   | 1.705 |
| 736.42   | 0      | 0     | 7.34   | 0      | 0      | 25.885 | 0       | 0.185  | 0    | 0     | 1      | 2.535 |
| 4885.775 | 0      | 0     | 5.42   | 0      | 0      | 8.705  | 2.205   | 0.12   | 0    | 0     | 28.735 | 3.325 |
| 3482.65  | 0      | 0     | 2.53   | 0      | 0      | 32.14  | 6.62    | 1.01   | 0    | 0     | 16.825 | 8.465 |
| 1950.29  | 0      | 0     | 6.165  | 0      | 5.7    | 255.42 | 8.31    | 13.39  | 0    | 0     | 0.045  | 7.03  |
| 7531.65  | 24.415 | 0.195 | 4.81   | 0      | 1.9    | 54.345 | 5.04    | 1.43   | 0    | 0     | 14.66  | 6.455 |
| 7531.65  | 18.67  | 0     | 12.385 | 0      | 0      | 27.015 | 2.205   | 0.255  | 0    | 0     | 13.72  | 3.71  |
| 7531.65  | 0      | 0     | 21.22  | 0      | 0      | 9.23   | 0       | 0.14   | 0    | 0     | 17.395 | 1.04  |
| 7531.65  | 16.335 | 0.1   | 16.085 | 0      | 0      | 19.02  | 0       | 0.265  | 0    | 0     | 15.8   | 0.805 |
| 424.895  | 28.595 | 3.4   | 12.75  | 12.375 | 2.75   | 33.93  | 148.875 | 27.54  | 0    | 0     | 4.86   | 1.04  |
| 121.285  | 11.785 | 1.695 | 30.05  | 0      | 3.4    | 31.345 | 171.53  | 23.42  | 0    | 0     | 3.145  | 3.02  |
| 500.9    | 5.66   | 0.72  | 14.12  | 12.375 | 3.185  | 34.83  | 228.63  | 26.715 | 0    | 0     | 3.21   | 3.75  |
| 466.74   | 40.025 | 2.84  | 24.915 | 0      | 4.225  | 38.865 | 111.315 | 20.65  | 0    | 0     | 3.52   | 3.57  |
| 270.075  | 35.77  | 2.045 | 24.72  | 17.21  | 4.625  | 43.945 | 201.705 | 38.85  | 0    | 0     | 4.38   | 3.57  |

| lung IL-12 (p4) | lung IL-12 (p7) | lung IL-13 | lung IL-17 | lung IP-10 | lung KC | lung MCP-1 | lung MIG | lung MIP-1 | lung TNFa | lung VEGF | gut GM-CS | gut IFN-g |
|-----------------|-----------------|------------|------------|------------|---------|------------|----------|------------|-----------|-----------|-----------|-----------|
|-----------------|-----------------|------------|------------|------------|---------|------------|----------|------------|-----------|-----------|-----------|-----------|

ng IL-12 (p4) ng IL-12 (p7) lung IL-13 lung IL-17 lung IP-10 lung KC lung MCP-1 lung MIG lung MIP-1 lung TNFa lung VEGF gut GM-CS gut IFN-g

|        |        |         |       |          |          |          |          |         |       |         |        |        |
|--------|--------|---------|-------|----------|----------|----------|----------|---------|-------|---------|--------|--------|
| 2.35   | 0.26   | 10.925  | 1.455 | 511.415  | 32.7     | 72.87    | 779.955  | 8.035   | 2.09  | 563.5   | 0      | 7.175  |
| 4.585  | 0.53   | 3.775   | 1.385 | 201.34   | 1315.53  | 436.05   | 102.605  | 320.495 | 2.745 | 548.53  | 0      | 2.185  |
| 5.21   | 3.685  | 52.545  | 1.765 | 6381.32  | 4186.805 | 2307.52  | 5521.375 | 930.04  | 2.88  | 1090.19 | 12.49  | 3.455  |
| 23.68  | 15.905 | 219.43  | 1.845 | 5000.0   | 5000.0   | 1691.585 | 24877.6  | 558.7   | 6.395 | 937.94  | 64.57  | 49.555 |
| 18.335 | 8      | 16.64   | 2.72  | 4982.09  | 3467.135 | 973.295  | 17871.34 | 101.525 | 1.53  | 609.17  | 36.97  | 13.335 |
| 9.46   | 0      | 119.205 | 0     | 1593.725 | 2038.19  | 1038.905 | 24877.6  | 163.395 | 1.865 | 298.01  | 69.82  | 22.945 |
| 2.535  | 0.74   | 7.715   | 0.665 | 810.915  | 391.34   | 644.3    | 3767.555 | 45.84   | 0     | 275.355 | 2.835  | 5.32   |
| 2.12   | 0      | 4.475   | 1.34  | 269.32   | 40.325   | 77.16    | 280.585  | 4.01    | 2.09  | 427     | 0      | 0      |
| 2.12   | 1.085  | 15.34   | 1.4   | 667.93   | 1578.995 | 676.62   | 1316.81  | 381.02  | 3.71  | 896.725 | 0      | 2.75   |
| 5.145  | 2.66   | 31.845  | 1.605 | 5721.665 | 4594.55  | 1958.425 | 4288.98  | 948.895 | 2.87  | 470.295 | 5.595  | 6.13   |
| 14.73  | 0      | 0       | 0     | 5000.0   | 2011.295 | 1227.74  | 24877.6  | 370.615 | 4.09  | 823.31  | 69.82  | 19.63  |
| 9.85   | 6.26   | 0       | 0     | 2844.78  | 3184.475 | 857.175  | 9242.475 | 76.54   | 0     | 874.07  | 28.535 | 17.57  |
| 12.805 | 0      | 126.985 | 0     | 539.8    | 111.085  | 145.905  | 2875.95  | 37.105  | 1.385 | 395.85  | 0      | 4.145  |
| 3.28   | 0      | 2.59    | 0.55  | 418.22   | 95.01    | 258.12   | 2559.675 | 35.49   | 0     | 340.73  | 16.89  | 2.005  |
| 2.09   | 0      | 7.015   | 1.39  | 115.8    | 8.875    | 35.805   | 493.625  | 6.435   | 2.065 | 482.76  | 0      | 8.025  |
| 4.3    | 1.085  | 9.365   | 1.41  | 726.36   | 1127.13  | 468.315  | 1606.345 | 346.345 | 6.925 | 599.65  | 3.57   | 4.395  |
| 4.395  | 1.65   | 46.345  | 1.895 | 4334.685 | 4198.465 | 1765.51  | 5143.765 | 813.69  | 2.9   | 898.73  | 4.645  | 24.02  |
| 20.52  | 8      | 5.165   | 5.725 | 5745.195 | 5156.34  | 1458.505 | 9330.48  | 344.43  | 7.415 | 591.525 | 36.125 | 12.43  |
| 22.22  | 9.085  | 16.295  | 9.825 | 4652.455 | 4970.88  | 1350.5   | 22265.9  | 142.395 | 1.53  | 730.71  | 28.535 | 15.58  |
| 8.82   | 7.135  | 0       | 0     | 1940.975 | 1318.885 | 1007.37  | 16878.53 | 58.635  | 0     | 224.275 | 16.52  | 10.83  |
| 2.33   | 0      | 4.56    | 0.215 | 631.93   | 338      | 564.505  | 3602.405 | 40.78   | 0     | 187.825 | 2.835  | 2.835  |
| 3.265  | 0.005  | 8.795   | 1.4   | 83.555   | 6.945    | 21.145   | 193.32   | 5.28    | 2.09  | 384.695 | 0      | 2.13   |
| 2.815  | 0.945  | 11.005  | 1.415 | 690.585  | 1319.2   | 610.305  | 440.795  | 396.53  | 4.445 | 917.265 | 0      | 1.705  |
| 24.02  | 9.62   | 255.525 | 1.06  | 5000.0   | 5000.0   | 1897.045 | 24877.6  | 823.66  | 7.955 | 855.16  | 45.595 | 17.695 |
| 14.435 | 7.57   | 41.365  | 0     | 4696.4   | 2813.79  | 1097.305 | 8027.43  | 134.545 | 2.06  | 556.165 | 16.52  | 11.63  |
| 27.865 | 8.435  | 32.125  | 2.245 | 4581.14  | 4990.685 | 1373.405 | 22265.9  | 186.94  | 5.04  | 704.53  | 35.265 | 11.29  |

|        |       |         |       |          |          |          |          |         |        |          |        |        |
|--------|-------|---------|-------|----------|----------|----------|----------|---------|--------|----------|--------|--------|
| 3.255  | 7.57  | 0       | 0     | 1196.335 | 883.475  | 982.675  | 9134.755 | 87.34   | 0      | 573.19   | 16.52  | 12.885 |
| 2.33   | 0     | 3.4     | 0.245 | 772.865  | 496.295  | 747.74   | 4301.91  | 41.81   | 0      | 309.745  | 0      | 3.665  |
| 12.595 | 0     | 182.99  | 0     | 141.8    | 56.805   | 107.765  | 495.95   | 81.025  | 1.055  | 748.29   | 37.985 | 13.395 |
| 18.215 | 14.75 | 145.395 | 1.06  | 625.4    | 1163.47  | 457.37   | 618.795  | 411.125 | 28.765 | 907.455  | 0      | 20.315 |
| 17.995 | 8.14  | 47.065  | 0.815 | 5000.0   | 5000.0   | 1528.835 | 14597.66 | 715.27  | 6.875  | 816.49   | 55.35  | 27.415 |
| 15.035 | 7.135 | 9.73    | 0     | 1383.28  | 208.935  | 423.965  | 5257.545 | 30.735  | 0      | 859.32   | 31.585 | 5.12   |
| 10.97  | 0     | 0       | 3.375 | 15949.19 | 4361.525 | 1258.42  | 10143.45 | 344.76  | 1.755  | 1357.095 | 13.565 | 6.495  |
| 8.555  | 7.46  | 0       | 10.13 | 3800.52  | 4943.47  | 1240.6   | 22265.9  | 147.41  | 0      | 599.485  | 34.38  | 8.97   |
| 1.715  | 0     | 11.335  | 0.295 | 433.73   | 73.285   | 212.195  | 2461.48  | 56.355  | 0      | 452.745  | 0      | 0      |
| 9.975  | 3.655 | 86.46   | 0     | 667.66   | 1179.06  | 429.395  | 249.675  | 247.655 | 12.825 | 499.495  | 0      | 17.355 |
| 22.78  | 6.525 | 280.83  | 0     | 5000.0   | 5000.0   | 1810.93  | 24877.6  | 631.41  | 7.415  | 518.435  | 43.26  | 12.155 |
| 13.345 | 7.135 | 0       | 7.495 | 6511.23  | 5244.425 | 1607.955 | 22265.9  | 505.7   | 3.51   | 721.205  | 21.245 | 10.83  |
| 8.47   | 0.975 | 26.02   | 1.8   | 7029.765 | 5192.055 | 1161.84  | 11131.6  | 151.21  | 1.755  | 343.13   | 0      | 1.585  |
| 2.635  | 5.16  | 0       | 2.86  | 1893.33  | 4071.805 | 1209.2   | 10771.06 | 110     | 0      | 399.24   | 36.97  | 9.685  |
| 4.31   | 0     | 0       | 0.825 | 613.965  | 389.32   | 774.3    | 4826.865 | 52.145  | 0      | 411.58   | 0      | 2.125  |

| Lung         | Lung         | Lung   | Lung   | Lung    | Lung   | Lung    | Lung    | Lung    | Lung  | Lung    | gut     | gut    |
|--------------|--------------|--------|--------|---------|--------|---------|---------|---------|-------|---------|---------|--------|
| UIL-12 (p40) | UIL-12 (p70) | UIL-13 | UIL-17 | UIP-10  | UKC    | UMCP-1  | UMIG    | UMIP-1a | UTNFa | UVEGF   | gGM-CSF | gIFN-g |
| 2.35         | 0.26         | 10.925 | 1.455  | 511.415 | 32.7   | 72.87   | 779.955 | 8.035   | 2.09  | 563.5   | 0       | 7.175  |
| 2.12         | 0            | 4.475  | 1.34   | 269.32  | 40.325 | 77.16   | 280.585 | 4.01    | 2.09  | 427     | 0       | 0      |
| 2.09         | 0            | 7.015  | 1.39   | 115.8   | 8.875  | 35.805  | 493.625 | 6.435   | 2.065 | 482.76  | 0       | 8.025  |
| 3.265        | 0.005        | 8.795  | 1.4    | 83.555  | 6.945  | 21.145  | 193.32  | 5.28    | 2.09  | 384.695 | 0       | 2.13   |
| 12.595       | 0            | 182.99 | 0      | 141.8   | 56.805 | 107.765 | 495.95  | 81.025  | 1.055 | 748.29  | 37.985  | 13.395 |

|              |              |        |        |         |          |         |          |         |       |         |         |        |
|--------------|--------------|--------|--------|---------|----------|---------|----------|---------|-------|---------|---------|--------|
| UIL-12 (p40) | UIL-12 (p70) | UIL-13 | UIL-17 | UIP-10  | UKC      | UMCP-1  | UMIG     | UMIP-1a | UTNFa | UVEGF   | gGM-CSF | gIFN-g |
| 4.585        | 0.53         | 3.775  | 1.385  | 201.34  | 1315.53  | 436.05  | 102.605  | 320.495 | 2.745 | 548.53  | 0       | 2.185  |
| 5.21         | 3.685        | 52.545 | 1.765  | 6381.32 | 4186.805 | 2307.52 | 5521.375 | 930.04  | 2.88  | 1090.19 | 12.49   | 3.455  |

|        |        |         |       |          |          |          |          |         |        |          |        |        |
|--------|--------|---------|-------|----------|----------|----------|----------|---------|--------|----------|--------|--------|
| 23.68  | 15.905 | 219.43  | 1.845 | 5000.0   | 5000.0   | 1691.585 | 24877.6  | 558.7   | 6.395  | 937.94   | 64.57  | 49.555 |
| 18.335 | 8      | 16.64   | 2.72  | 4982.09  | 3467.135 | 973.295  | 17871.34 | 101.525 | 1.53   | 609.17   | 36.97  | 13.335 |
| 9.46   | 0      | 119.205 | 0     | 1593.725 | 2038.19  | 1038.905 | 24877.6  | 163.395 | 1.865  | 298.01   | 69.82  | 22.945 |
| 2.535  | 0.74   | 7.715   | 0.665 | 810.915  | 391.34   | 644.3    | 3767.555 | 45.84   | 0      | 275.355  | 2.835  | 5.32   |
| 2.12   | 1.085  | 15.34   | 1.4   | 667.93   | 1578.995 | 676.62   | 1316.81  | 381.02  | 3.71   | 896.725  | 0      | 2.75   |
| 5.145  | 2.66   | 31.845  | 1.605 | 5721.665 | 4594.55  | 1958.425 | 4288.98  | 948.895 | 2.87   | 470.295  | 5.595  | 6.13   |
| 14.73  | 0      | 0       | 0     | 5000.0   | 2011.295 | 1227.74  | 24877.6  | 370.615 | 4.09   | 823.31   | 69.82  | 19.63  |
| 9.85   | 6.26   | 0       | 0     | 2844.78  | 3184.475 | 857.175  | 9242.475 | 76.54   | 0      | 874.07   | 28.535 | 17.57  |
| 12.805 | 0      | 126.985 | 0     | 539.8    | 111.085  | 145.905  | 2875.95  | 37.105  | 1.385  | 395.85   | 0      | 4.145  |
| 3.28   | 0      | 2.59    | 0.55  | 418.22   | 95.01    | 258.12   | 2559.675 | 35.49   | 0      | 340.73   | 16.89  | 2.005  |
| 4.3    | 1.085  | 9.365   | 1.41  | 726.36   | 1127.13  | 468.315  | 1606.345 | 346.345 | 6.925  | 599.65   | 3.57   | 4.395  |
| 4.395  | 1.65   | 46.345  | 1.895 | 4334.685 | 4198.465 | 1765.51  | 5143.765 | 813.69  | 2.9    | 898.73   | 4.645  | 24.02  |
| 20.52  | 8      | 5.165   | 5.725 | 5745.195 | 5156.34  | 1458.505 | 9330.48  | 344.43  | 7.415  | 591.525  | 36.125 | 12.43  |
| 22.22  | 9.085  | 16.295  | 9.825 | 4652.455 | 4970.88  | 1350.5   | 22265.9  | 142.395 | 1.53   | 730.71   | 28.535 | 15.58  |
| 8.82   | 7.135  | 0       | 0     | 1940.975 | 1318.885 | 1007.37  | 16878.53 | 58.635  | 0      | 224.275  | 16.52  | 10.83  |
| 2.33   | 0      | 4.56    | 0.215 | 631.93   | 338      | 564.505  | 3602.405 | 40.78   | 0      | 187.825  | 2.835  | 2.835  |
| 2.815  | 0.945  | 11.005  | 1.415 | 690.585  | 1319.2   | 610.305  | 440.795  | 396.53  | 4.445  | 917.265  | 0      | 1.705  |
| 24.02  | 9.62   | 255.525 | 1.06  | 5000.0   | 5000.0   | 1897.045 | 24877.6  | 823.66  | 7.955  | 855.16   | 45.595 | 17.695 |
| 14.435 | 7.57   | 41.365  | 0     | 4696.4   | 2813.79  | 1097.305 | 8027.43  | 134.545 | 2.06   | 556.165  | 16.52  | 11.63  |
| 27.865 | 8.435  | 32.125  | 2.245 | 4581.14  | 4990.685 | 1373.405 | 22265.9  | 186.94  | 5.04   | 704.53   | 35.265 | 11.29  |
| 3.255  | 7.57   | 0       | 0     | 1196.335 | 883.475  | 982.675  | 9134.755 | 87.34   | 0      | 573.19   | 16.52  | 12.885 |
| 2.33   | 0      | 3.4     | 0.245 | 772.865  | 496.295  | 747.74   | 4301.91  | 41.81   | 0      | 309.745  | 0      | 3.665  |
| 18.215 | 14.75  | 145.395 | 1.06  | 625.4    | 1163.47  | 457.37   | 618.795  | 411.125 | 28.765 | 907.455  | 0      | 20.315 |
| 17.995 | 8.14   | 47.065  | 0.815 | 5000.0   | 5000.0   | 1528.835 | 14597.66 | 715.27  | 6.875  | 816.49   | 55.35  | 27.415 |
| 15.035 | 7.135  | 9.73    | 0     | 1383.28  | 208.935  | 423.965  | 5257.545 | 30.735  | 0      | 859.32   | 31.585 | 5.12   |
| 10.97  | 0      | 0       | 3.375 | 15949.19 | 4361.525 | 1258.42  | 10143.45 | 344.76  | 1.755  | 1357.095 | 13.565 | 6.495  |
| 8.555  | 7.46   | 0       | 10.13 | 3800.52  | 4943.47  | 1240.6   | 22265.9  | 147.41  | 0      | 599.485  | 34.38  | 8.97   |
| 1.715  | 0      | 11.335  | 0.295 | 433.73   | 73.285   | 212.195  | 2461.48  | 56.355  | 0      | 452.745  | 0      | 0      |
| 9.975  | 3.655  | 86.46   | 0     | 667.66   | 1179.06  | 429.395  | 249.675  | 247.655 | 12.825 | 499.495  | 0      | 17.355 |

|              |             |          |              |                |                 |               |                 |               |          |               |              |              |
|--------------|-------------|----------|--------------|----------------|-----------------|---------------|-----------------|---------------|----------|---------------|--------------|--------------|
| 22.78        | 6.525       | 280.83   | 0            | 5000.0         | 5000.0          | 1810.93       | 24877.6         | 631.41        | 7.415    | 518.435       | 43.26        | 12.155       |
| 13.345       | 7.135       | 0        | 7.495        | 6511.23        | 5244.425        | 1607.955      | 22265.9         | 505.7         | 3.51     | 721.205       | 21.245       | 10.83        |
| 8.47         | 0.975       | 26.02    | 1.8          | 7029.765       | 5192.055        | 1161.84       | 11131.6         | 151.21        | 1.755    | 343.13        | 0            | 1.585        |
| <b>2.635</b> | <b>5.16</b> | <b>0</b> | <b>2.86</b>  | <b>1893.33</b> | <b>4071.805</b> | <b>1209.2</b> | <b>10771.06</b> | <b>110</b>    | <b>0</b> | <b>399.24</b> | <b>36.97</b> | <b>9.685</b> |
| <b>4.31</b>  | <b>0</b>    | <b>0</b> | <b>0.825</b> | <b>613.965</b> | <b>389.32</b>   | <b>774.3</b>  | <b>4826.865</b> | <b>52.145</b> | <b>0</b> | <b>411.58</b> | <b>0</b>     | <b>2.125</b> |

ng IL-12 (p4ng IL-12 (p7 lung IL-13 lung IL-17 lung IP-10 lung KC lung MCP-1 lung MIG lung MIP-1α lung TNFa lung VEGF gut GM-CS gut IFN-g  
 Lung gut gut

ng IL-12 (p4ng IL-12 (p7 lung IL-13 lung IL-17 lung IP-10 lung KC lung MCP-1 lung MIG lung MIP-1α lung TNFa lung VEGF gut GM-CS gut IFN-g

|       |       |         |       |         |         |         |          |        |        |         |         |        |
|-------|-------|---------|-------|---------|---------|---------|----------|--------|--------|---------|---------|--------|
| 2.96  | 3.43  | 6.92    | 0.515 | 859.11  | 110.335 | 23.015  | 3442.13  | 18.755 | 0      | 377.445 | 0       | 6.025  |
| 8.825 | 23.78 | 18.765  | 0.875 | 572.7   | 916.51  | 75.585  | 2072.575 | 77.26  | 17.165 | 699.73  | 0       | 16.995 |
| 8.55  | 0     | 0       | 0     | 440.175 | 2785.99 | 873.305 | 7531.65  | 118.7  | 0.32   | 443.86  | 109.135 | 75.07  |
| 0     | 0     | 0       | 0     | 288.39  | 1073.51 | 285.92  | 7531.65  | 42.28  | 0.185  | 422.64  | 20.805  | 13.1   |
| 0     | 0     | 0       | 0     | 345.37  | 300.39  | 1056.54 | 7531.65  | 37.975 | 0      | 205.96  | 0       | 0      |
| 0     | 0     | 25.17   | 1.025 | 70.205  | 34.45   | 45.17   | 325.61   | 11.785 | 0.805  | 275.635 | 12.375  | 6.425  |
| 1.02  | 0     | 101.115 | 2.755 | 76.42   | 56.525  | 50.13   | 190.14   | 22.985 | 0.505  | 525.665 | 0       | 0.435  |

|   |   |   |   |        |        |        |          |   |   |         |   |      |
|---|---|---|---|--------|--------|--------|----------|---|---|---------|---|------|
| 0 | 0 | 0 | 0 | 227.53 | 100.32 | 67.11  | 3676.005 | 0 | 0 | 429.87  | 0 | 0    |
| 0 | 0 | 0 | 0 | 51.125 | 11.22  | 13.885 | 199.775  | 0 | 0 | 204.895 | 0 | 0.64 |
| 0 | 0 | 0 | 0 | 67.05  | 16.33  | 39.56  | 189.175  | 0 | 0 | 188.69  | 0 | 0    |

|       |        |        |   |         |          |        |         |         |        |         |   |        |
|-------|--------|--------|---|---------|----------|--------|---------|---------|--------|---------|---|--------|
| 15.81 | 11.005 | 58.675 | 0 | 472.845 | 1254.645 | 380.16 | 1258.55 | 146.945 | 10.61  | 588.79  | 0 | 24.43  |
| 16.9  | 0      | 191.82 | 0 | 404.45  | 1596.715 | 565.57 | 578.76  | 198.94  | 14.375 | 577.545 | 0 | 12.605 |
| 4.515 | 0      | 0      | 0 | 384.575 | 2155.93  | 507.65 | 422.53  | 178.365 | 6.83   | 210.5   | 0 | 0      |

|      |   |   |      |        |         |         |          |        |      |         |        |         |
|------|---|---|------|--------|---------|---------|----------|--------|------|---------|--------|---------|
| 1.38 | 0 | 0 | 0    | 356.07 | 936.555 | 358.675 | 1314.195 | 68.945 | 0.01 | 169.395 | 0      | 0       |
| 0    | 0 | 0 | 0    | 130.4  | 35.12   | 100.635 | 423.34   | 0      | 0    | 266.575 | 0      | 0       |
| 0.63 | 0 | 0 | 0.34 | 325.08 | 2413.39 | 572.2   | 2508.19  | 54.98  | 0.01 | 248.205 | 306.83 | 175.475 |

|   |   |   |   |         |        |        |         |       |   |         |        |       |
|---|---|---|---|---------|--------|--------|---------|-------|---|---------|--------|-------|
| 0 | 0 | 0 | 0 | 238.955 | 513.83 | 98.92  | 1269.26 | 10.23 | 0 | 104.44  | 26.36  | 13.33 |
| 0 | 0 | 0 | 0 | 47.635  | 5.05   | 11.665 | 223.02  | 0     | 0 | 152.315 | 12.375 | 26.5  |



|   |   |   |   |        |         |         |          |        |       |         |   |       |
|---|---|---|---|--------|---------|---------|----------|--------|-------|---------|---|-------|
| 0 | 0 | 0 | 0 | 317.56 | 925.605 | 216.035 | 1132.735 | 24.415 | 0.045 | 237.205 | 0 | 10.47 |
|---|---|---|---|--------|---------|---------|----------|--------|-------|---------|---|-------|

|   |   |   |       |         |         |         |         |        |   |         |   |       |
|---|---|---|-------|---------|---------|---------|---------|--------|---|---------|---|-------|
| 0 | 0 | 0 | 1.915 | 302.4   | 315.5   | 724.47  | 7531.65 | 27.625 | 0 | 225.68  | 0 | 0.25  |
| 0 | 0 | 0 | 0.695 | 387.295 | 260.855 | 555.425 | 7531.65 | 20.755 | 0 | 130.095 | 0 | 18.82 |
| 0 | 0 | 0 | 0     | 188.87  | 266.755 | 484.82  | 7531.65 | 21.725 | 0 | 158.045 | 0 | 1.82  |

|       |   |         |      |        |        |        |         |        |       |         |        |       |
|-------|---|---------|------|--------|--------|--------|---------|--------|-------|---------|--------|-------|
| 0     | 0 | 73.74   | 7.33 | 82.78  | 46.6   | 65.62  | 303.46  | 28.595 | 2.045 | 365.405 | 34.555 | 0.435 |
| 0.615 | 0 | 88.43   | 2.92 | 98.135 | 51.635 | 80.585 | 925.435 | 33.5   | 1.93  | 320.23  | 0      | 0     |
| 2.385 | 0 | 175.535 | 3.3  | 71.71  | 50.825 | 78.275 | 666.785 | 22.985 | 0.59  | 409.585 | 12.375 | 0.9   |

|       |   |        |      |        |        |        |         |        |       |        |   |       |
|-------|---|--------|------|--------|--------|--------|---------|--------|-------|--------|---|-------|
| 1.22  | 0 | 92.76  | 2.29 | 145.22 | 69.095 | 52.445 | 236.305 | 24.475 | 1.495 | 397.87 | 0 | 14.33 |
| 5.375 | 0 | 220.59 | 2.72 | 65.755 | 73.64  | 41.78  | 217.75  | 28.595 | 0.505 | 584.7  | 0 | 37.71 |

|              |              |        |        |        |         |        |          |         |       |         |         | Pg/Mg  |     |
|--------------|--------------|--------|--------|--------|---------|--------|----------|---------|-------|---------|---------|--------|-----|
| Lung         | Lung         | Lung   | Lung   | Lung   | Lung    | Lung   | Lung     | Lung    | Lung  | Lung    | Lung    | gut    | gut |
| JIL-12 (p40) | JIL-12 (p70) | UIL-13 | UIL-17 | UIP-10 | UKC     | UMCP-1 | UMIG     | UMIP-1a | UTNfa | UVEGF   | gGM-CSF | gIFN-g |     |
| 2.96         | 3.43         | 6.92   | 0.515  | 859.11 | 110.335 | 23.015 | 3442.13  | 18.755  | 0     | 377.445 | 0       | 6.025  |     |
| 0            | 0            | 0      | 0      | 227.53 | 100.32  | 67.11  | 3676.005 | 0       | 0     | 429.87  | 0       | 0      |     |
| 0            | 0            | 0      | 0      | 51.125 | 11.22   | 13.885 | 199.775  | 0       | 0     | 204.895 | 0       | 0.64   |     |
| 0            | 0            | 0      | 0      | 67.05  | 16.33   | 39.56  | 189.175  | 0       | 0     | 188.69  | 0       | 0      |     |

| JIL-12 (p40) | JIL-12 (p70) | UIL-13  | UIL-17 | UIP-10  | UKC     | UMCP-1  | UMIG     | UMIP-1a | UTNfa  | UVEGF   | gGM-CSF | gIFN-g |
|--------------|--------------|---------|--------|---------|---------|---------|----------|---------|--------|---------|---------|--------|
| 8.825        | 23.78        | 18.765  | 0.875  | 572.7   | 916.51  | 75.585  | 2072.575 | 77.26   | 17.165 | 699.73  | 0       | 16.995 |
| 8.55         | 0            | 0       | 0      | 440.175 | 2785.99 | 873.305 | 7531.65  | 118.7   | 0.32   | 443.86  | 109.135 | 75.07  |
| 0            | 0            | 0       | 0      | 288.39  | 1073.51 | 285.92  | 7531.65  | 42.28   | 0.185  | 422.64  | 20.805  | 13.1   |
| 0            | 0            | 0       | 0      | 345.37  | 300.39  | 1056.54 | 7531.65  | 37.975  | 0      | 205.96  | 0       | 0      |
| 0            | 0            | 25.17   | 1.025  | 70.205  | 34.45   | 45.17   | 325.61   | 11.785  | 0.805  | 275.635 | 12.375  | 6.425  |
| 1.02         | 0            | 101.115 | 2.755  | 76.42   | 56.525  | 50.13   | 190.14   | 22.985  | 0.505  | 525.665 | 0       | 0.435  |

|       |        |        |   |         |          |        |         |         |       |        |   |       |
|-------|--------|--------|---|---------|----------|--------|---------|---------|-------|--------|---|-------|
| 15.81 | 11.005 | 58.675 | 0 | 472.845 | 1254.645 | 380.16 | 1258.55 | 146.945 | 10.61 | 588.79 | 0 | 24.43 |
|-------|--------|--------|---|---------|----------|--------|---------|---------|-------|--------|---|-------|

|       |   |         |       |         |          |         |          |         |        |         |        |         |
|-------|---|---------|-------|---------|----------|---------|----------|---------|--------|---------|--------|---------|
| 16.9  | 0 | 191.82  | 0     | 404.45  | 1596.715 | 565.57  | 578.76   | 198.94  | 14.375 | 577.545 | 0      | 12.605  |
| 4.515 | 0 | 0       | 0     | 384.575 | 2155.93  | 507.65  | 422.53   | 178.365 | 6.83   | 210.5   | 0      | 0       |
| 1.38  | 0 | 0       | 0     | 356.07  | 936.555  | 358.675 | 1314.195 | 68.945  | 0.01   | 169.395 | 0      | 0       |
| 0     | 0 | 0       | 0     | 130.4   | 35.12    | 100.635 | 423.34   | 0       | 0      | 266.575 | 0      | 0       |
| 0.63  | 0 | 0       | 0.34  | 325.08  | 2413.39  | 572.2   | 2508.19  | 54.98   | 0.01   | 248.205 | 306.83 | 175.475 |
| 0     | 0 | 0       | 0     | 238.955 | 513.83   | 98.92   | 1269.26  | 10.23   | 0      | 104.44  | 26.36  | 13.33   |
| 0     | 0 | 0       | 0     | 47.635  | 5.05     | 11.665  | 223.02   | 0       | 0      | 152.315 | 12.375 | 26.5    |
| 0     | 0 | 0       | 0     | 317.56  | 925.605  | 216.035 | 1132.735 | 24.415  | 0.045  | 237.205 | 0      | 10.47   |
| 0     | 0 | 0       | 1.915 | 302.4   | 315.5    | 724.47  | 7531.65  | 27.625  | 0      | 225.68  | 0      | 0.25    |
| 0     | 0 | 0       | 0.695 | 387.295 | 260.855  | 555.425 | 7531.65  | 20.755  | 0      | 130.095 | 0      | 18.82   |
| 0     | 0 | 0       | 0     | 188.87  | 266.755  | 484.82  | 7531.65  | 21.725  | 0      | 158.045 | 0      | 1.82    |
| 0     | 0 | 73.74   | 7.33  | 82.78   | 46.6     | 65.62   | 303.46   | 28.595  | 2.045  | 365.405 | 34.555 | 0.435   |
| 0.615 | 0 | 88.43   | 2.92  | 98.135  | 51.635   | 80.585  | 925.435  | 33.5    | 1.93   | 320.23  | 0      | 0       |
| 2.385 | 0 | 175.535 | 3.3   | 71.71   | 50.825   | 78.275  | 666.785  | 22.985  | 0.59   | 409.585 | 12.375 | 0.9     |
| 1.22  | 0 | 92.76   | 2.29  | 145.22  | 69.095   | 52.445  | 236.305  | 24.475  | 1.495  | 397.87  | 0      | 14.33   |
| 5.375 | 0 | 220.59  | 2.72  | 65.755  | 73.64    | 41.78   | 217.75   | 28.595  | 0.505  | 584.7   | 0      | 37.71   |

| gut IL-1a | gut IL-1b | gut IL-2 | gut IL-4 | gut IL-5 | gut IL-6 | gut IL-10 | gut IL-12 (p70) | gut IL-12 (p70) | gut IL-13 | gut IL-17 | gut IP-10 | gut KC   |
|-----------|-----------|----------|----------|----------|----------|-----------|-----------------|-----------------|-----------|-----------|-----------|----------|
| 18.195    | 8.035     | 1.835    | 1.63     | 1.145    | 2.565    | 2.025     | 1.895           | 1.795           | 0.78      | 1.34      | 89.67     | 8.335    |
| 7.175     | 2.885     | 1.22     | 1.55     | 1.145    | 76.395   | 1.245     | 1.06            | 0               | 0         | 1.28      | 103.205   | 274.23   |
| 17.915    | 26.13     | 1.51     | 1.725    | 1.74     | 420.575  | 1.425     | 4.57            | 0.665           | 19.33     | 2.73      | 2268.605  | 1079.415 |
| 97.625    | 40.955    | 28.415   | 1.125    | 0.765    | 292.97   | 21.565    | 17.775          | 9.62            | 286.74    | 0         | 825.17    | 1177.4   |
| 28.955    | 20.2437   | 7.005    | 0        | 0        | 389.615  | 59.025    | 16.93           | 8.87            | 0         | 4.485     | 3533.57   | 780.17   |
| 823.91    | 30.87     | 8.595    | 1.205    | 0.915    | 335.985  | 31.655    | 19.76           | 15.33           | 411.63    | 0         | 1357.85   | 799.53   |
| 24.425    | 27.195    | 3.875    | 0        | 0        | 8.63     | 4.25      | 10.25           | 31.195          | 10.22     | 0.75      | 195.18    | 39.775   |
| 2.43      | 1.795     | 1.395    | 1.575    | 1.125    | 0.93     | 1.795     | 1.645           | 1.58            | 0         | 1.42      | 42.54     | 4.205    |
| 10.21     | 8.035     | 1.215    | 1.79     | 1.22     | 380.425  | 1.315     | 5.18            | 0               | 0.1       | 1.31      | 797.045   | 2143.89  |
| 14.465    | 23.475    | 2.61     | 1.58     | 1.295    | 193.58   | 1.89      | 4.25            | 1.935           | 23.495    | 1.545     | 2167.49   | 822.305  |
| 36.96     | 24.9      | 5.135    | 1.185    | 1.36     | 526.56   | 26.915    | 24.475          | 21.19           | 197.315   | 0         | 5000.0    | 1279.115 |
| 38.275    | 26.3774   | 17.365   | 0        | 0        | 161.685  | 54.28     | 18.565          | 7.785           | 0         | 2.845     | 660.64    | 489.04   |
| 47.54     | 2.55      | 3.305    | 0.985    | 0        | 3.625    | 9.61      | 6.525           | 0               | 104.25    | 0         | 80.07     | 19.12    |
| 22.57     | 12.86     | 0.54     | 0        | 0        | 0.81     | 1.735     | 4.31            | 2.26            | 1.695     | 0.205     | 72.73     | 28.745   |
| 12.325    | 4.13      | 1.9      | 1.6      | 1.135    | 1.55     | 3.19      | 2.005           | 0.945           | 0.85      | 1.32      | 35.64     | 2.395    |
| 12.125    | 14.57     | 1.665    | 1.695    | 1.23     | 261.78   | 1.665     | 4.425           | 0.395           | 0.64      | 1.31      | 993.75    | 2005.5   |
| 104.51    | 18.395    | 16.365   | 1.59     | 1.405    | 366.445  | 1.46      | 3.815           | 0.945           | 16.605    | 1.505     | 2910.77   | 1447.77  |
| 20.86     | 21.7958   | 3.005    | 0        | 0        | 329.095  | 81.935    | 19.49           | 6.915           | 0         | 0         | 2291.525  | 1234.62  |
| 28.34     | 16.0107   | 10.56    | 0        | 0        | 208.445  | 48.755    | 8.03            | 7.35            | 0         | 2.76      | 1533.11   | 739.16   |
| 6.14      | 15.4795   | 0        | 0        | 0        | 4.7      | 10.945    | 7.5             | 7.675           | 0         | 0         | 100.28    | 53.825   |
| 73.95     | 10.58     | 3.38     | 0        | 0        | 0.13     | 1.735     | 7.305           | 9.64            | 22.72     | 0.165     | 64.23     | 19.86    |
| 4.335     | 2.455     | 1.8      | 1.715    | 1.125    | 0.865    | 1.95      | 1.84            | 2.37            | 0         | 1.285     | 33.165    | 2.81     |
| 7.985     | 7.275     | 1.21     | 1.69     | 1.2      | 267.5    | 1.425     | 4.19            | 0               | 0         | 1.295     | 812.62    | 2467.975 |
| 325.035   | 46.775    | 12.885   | 1.105    | 0.295    | 345.665  | 14.595    | 29.28           | 4.7             | 222.975   | 0         | 871.66    | 1210.995 |
| 42.905    | 16.5502   | 7.31     | 0        | 0        | 377.045  | 53.55     | 12.115          | 6.04            | 0         | 0         | 2522.12   | 1064.665 |
| 25.445    | 21.2812   | 8.295    | 0        | 0        | 277.13   | 69.49     | 20.86           | 7.785           | 0         | 3.045     | 1325.415  | 918.1    |

|               |              |              |          |          |               |               |               |              |          |             |                |               |
|---------------|--------------|--------------|----------|----------|---------------|---------------|---------------|--------------|----------|-------------|----------------|---------------|
| 43.42         | 15.4795      | 9.37         | 0        | 0        | 35.39         | 48.385        | 10.99         | 7.135        | 46.59    | 0           | 362.78         | 140.96        |
| 43.36         | 18.385       | 5.695        | 0        | 0        | 2.425         | 4.405         | 8.06          | 23.92        | 24.235   | 0.5         | 72.065         | 18.395        |
| 83.755        | 22.315       | 5.775        | 1.205    | 0.295    | 1.7           | 13.55         | 13.87         | 2.445        | 123.835  | 0           | 67.91          | 14.845        |
| 75.295        | 46.775       | 8.225        | 1.105    | 0.61     | 86.035        | 16.695        | 13.98         | 43.425       | 289.545  | 0           | 370.59         | 1049.15       |
| 49.01         | 36.775       | 6.04         | 1.24     | 0.765    | 748.88        | 17.96         | 40.68         | 37.51        | 208.775  | 0           | 5000.0         | 1528.44       |
| 23.78         | 22.3104      | 3.96         | 0        | 3.665    | 622.18        | 19.205        | 13.585        | 7.35         | 0        | 0.59        | 2962.275       | 1338.26       |
| 30.875        | 15.835       | 1.575        | 0        | 0        | 232.3         | 6.78          | 8.94          | 4.18         | 6.23     | 1.895       | 3090.86        | 1228.33       |
| 12.665        | 3.2619       | 0            | 0        | 0        | 532.05        | 23.995        | 5.865         | 7.135        | 0        | 0           | 1103.445       | 1848.62       |
| 16.045        | 17.295       | 0.505        | 0        | 0        | 0.97          | 1.425         | 1.87          | 10.125       | 0        | 0.95        | 156.585        | 19.375        |
| 107.675       | 17.1         | 7.04         | 1.185    | 0        | 107.175       | 11.675        | 13.87         | 0            | 266.135  | 0           | 302.28         | 1242.26       |
| 53.24         | 25.755       | 5.74         | 1.125    | 0.765    | 759.61        | 17.54         | 21.99         | 45.55        | 261.935  | 0           | 5000.0         | 1495.93       |
| 27.54         | 16.0107      | 7.435        | 0        | 0        | 49.405        | 21.615        | 9.335         | 7.35         | 0        | 0           | 344.15         | 111.485       |
| 18.29         | 8.24         | 1.97         | 0        | 0        | 211.64        | 1.735         | 2.485         | 0            | 0        | 0.565       | 2587.28        | 734.835       |
| <b>24.635</b> | <b>13.57</b> | <b>5.145</b> | <b>0</b> | <b>0</b> | <b>168.83</b> | <b>45.415</b> | <b>14.085</b> | <b>7.025</b> | <b>0</b> | <b>0</b>    | <b>744.025</b> | <b>571.63</b> |
| <b>22.325</b> | <b>8.635</b> | <b>1.05</b>  | <b>0</b> | <b>0</b> | <b>0.535</b>  | <b>0.5</b>    | <b>1.615</b>  | <b>1.425</b> | <b>0</b> | <b>0.11</b> | <b>150.78</b>  | <b>30.645</b> |

| gut    | gut    | gut   | gut   | gut   | gut   | gut    | gut          | gut          | gut     | gut    | gut    | gut    |
|--------|--------|-------|-------|-------|-------|--------|--------------|--------------|---------|--------|--------|--------|
| gIL-1a | gIL-1b | gIL-2 | gIL-4 | gIL-5 | gIL-6 | gIL-10 | gIL-12 (p40) | gIL-12 (p70) | gIL-13  | gIL-17 | gIP-10 | gKC    |
| 18.195 | 8.035  | 1.835 | 1.63  | 1.145 | 2.565 | 2.025  | 1.895        | 1.795        | 0.78    | 1.34   | 89.67  | 8.335  |
| 2.43   | 1.795  | 1.395 | 1.575 | 1.125 | 0.93  | 1.795  | 1.645        | 1.58         | 0       | 1.42   | 42.54  | 4.205  |
| 12.325 | 4.13   | 1.9   | 1.6   | 1.135 | 1.55  | 3.19   | 2.005        | 0.945        | 0.85    | 1.32   | 35.64  | 2.395  |
| 4.335  | 2.455  | 1.8   | 1.715 | 1.125 | 0.865 | 1.95   | 1.84         | 2.37         | 0       | 1.285  | 33.165 | 2.81   |
| 83.755 | 22.315 | 5.775 | 1.205 | 0.295 | 1.7   | 13.55  | 13.87        | 2.445        | 123.835 | 0      | 67.91  | 14.845 |

| gIL-1a | gIL-1b | gIL-2 | gIL-4 | gIL-5 | gIL-6   | gIL-10 | gIL-12 (p40) | gIL-12 (p70) | gIL-13 | gIL-17 | gIP-10   | gKC      |
|--------|--------|-------|-------|-------|---------|--------|--------------|--------------|--------|--------|----------|----------|
| 7.175  | 2.885  | 1.22  | 1.55  | 1.145 | 76.395  | 1.245  | 1.06         | 0            | 0      | 1.28   | 103.205  | 274.23   |
| 17.915 | 26.13  | 1.51  | 1.725 | 1.74  | 420.575 | 1.425  | 4.57         | 0.665        | 19.33  | 2.73   | 2268.605 | 1079.415 |

|         |         |        |       |       |         |        |        |        |         |       |          |          |
|---------|---------|--------|-------|-------|---------|--------|--------|--------|---------|-------|----------|----------|
| 97.625  | 40.955  | 28.415 | 1.125 | 0.765 | 292.97  | 21.565 | 17.775 | 9.62   | 286.74  | 0     | 825.17   | 1177.4   |
| 28.955  | 20.2437 | 7.005  | 0     | 0     | 389.615 | 59.025 | 16.93  | 8.87   | 0       | 4.485 | 3533.57  | 780.17   |
| 823.91  | 30.87   | 8.595  | 1.205 | 0.915 | 335.985 | 31.655 | 19.76  | 15.33  | 411.63  | 0     | 1357.85  | 799.53   |
| 24.425  | 27.195  | 3.875  | 0     | 0     | 8.63    | 4.25   | 10.25  | 31.195 | 10.22   | 0.75  | 195.18   | 39.775   |
| 10.21   | 8.035   | 1.215  | 1.79  | 1.22  | 380.425 | 1.315  | 5.18   | 0      | 0.1     | 1.31  | 797.045  | 2143.89  |
| 14.465  | 23.475  | 2.61   | 1.58  | 1.295 | 193.58  | 1.89   | 4.25   | 1.935  | 23.495  | 1.545 | 2167.49  | 822.305  |
| 36.96   | 24.9    | 5.135  | 1.185 | 1.36  | 526.56  | 26.915 | 24.475 | 21.19  | 197.315 | 0     | 5000.0   | 1279.115 |
| 38.275  | 26.3774 | 17.365 | 0     | 0     | 161.685 | 54.28  | 18.565 | 7.785  | 0       | 2.845 | 660.64   | 489.04   |
| 47.54   | 2.55    | 3.305  | 0.985 | 0     | 3.625   | 9.61   | 6.525  | 0      | 104.25  | 0     | 80.07    | 19.12    |
| 22.57   | 12.86   | 0.54   | 0     | 0     | 0.81    | 1.735  | 4.31   | 2.26   | 1.695   | 0.205 | 72.73    | 28.745   |
| 12.125  | 14.57   | 1.665  | 1.695 | 1.23  | 261.78  | 1.665  | 4.425  | 0.395  | 0.64    | 1.31  | 993.75   | 2005.5   |
| 104.51  | 18.395  | 16.365 | 1.59  | 1.405 | 366.445 | 1.46   | 3.815  | 0.945  | 16.605  | 1.505 | 2910.77  | 1447.77  |
| 20.86   | 21.7958 | 3.005  | 0     | 0     | 329.095 | 81.935 | 19.49  | 6.915  | 0       | 0     | 2291.525 | 1234.62  |
| 28.34   | 16.0107 | 10.56  | 0     | 0     | 208.445 | 48.755 | 8.03   | 7.35   | 0       | 2.76  | 1533.11  | 739.16   |
| 6.14    | 15.4795 | 0      | 0     | 0     | 4.7     | 10.945 | 7.5    | 7.675  | 0       | 0     | 100.28   | 53.825   |
| 73.95   | 10.58   | 3.38   | 0     | 0     | 0.13    | 1.735  | 7.305  | 9.64   | 22.72   | 0.165 | 64.23    | 19.86    |
| 7.985   | 7.275   | 1.21   | 1.69  | 1.2   | 267.5   | 1.425  | 4.19   | 0      | 0       | 1.295 | 812.62   | 2467.975 |
| 325.035 | 46.775  | 12.885 | 1.105 | 0.295 | 345.665 | 14.595 | 29.28  | 4.7    | 222.975 | 0     | 871.66   | 1210.995 |
| 42.905  | 16.5502 | 7.31   | 0     | 0     | 377.045 | 53.55  | 12.115 | 6.04   | 0       | 0     | 2522.12  | 1064.665 |
| 25.445  | 21.2812 | 8.295  | 0     | 0     | 277.13  | 69.49  | 20.86  | 7.785  | 0       | 3.045 | 1325.415 | 918.1    |
| 43.42   | 15.4795 | 9.37   | 0     | 0     | 35.39   | 48.385 | 10.99  | 7.135  | 46.59   | 0     | 362.78   | 140.96   |
| 43.36   | 18.385  | 5.695  | 0     | 0     | 2.425   | 4.405  | 8.06   | 23.92  | 24.235  | 0.5   | 72.065   | 18.395   |
| 75.295  | 46.775  | 8.225  | 1.105 | 0.61  | 86.035  | 16.695 | 13.98  | 43.425 | 289.545 | 0     | 370.59   | 1049.15  |
| 49.01   | 36.775  | 6.04   | 1.24  | 0.765 | 748.88  | 17.96  | 40.68  | 37.51  | 208.775 | 0     | 5000.0   | 1528.44  |
| 23.78   | 22.3104 | 3.96   | 0     | 3.665 | 622.18  | 19.205 | 13.585 | 7.35   | 0       | 0.59  | 2962.275 | 1338.26  |
| 30.875  | 15.835  | 1.575  | 0     | 0     | 232.3   | 6.78   | 8.94   | 4.18   | 6.23    | 1.895 | 3090.86  | 1228.33  |
| 12.665  | 3.2619  | 0      | 0     | 0     | 532.05  | 23.995 | 5.865  | 7.135  | 0       | 0     | 1103.445 | 1848.62  |
| 16.045  | 17.295  | 0.505  | 0     | 0     | 0.97    | 1.425  | 1.87   | 10.125 | 0       | 0.95  | 156.585  | 19.375   |
| 107.675 | 17.1    | 7.04   | 1.185 | 0     | 107.175 | 11.675 | 13.87  | 0      | 266.135 | 0     | 302.28   | 1242.26  |

|               |              |              |          |          |               |               |               |              |          |             |                |               |
|---------------|--------------|--------------|----------|----------|---------------|---------------|---------------|--------------|----------|-------------|----------------|---------------|
| 53.24         | 25.755       | 5.74         | 1.125    | 0.765    | 759.61        | 17.54         | 21.99         | 45.55        | 261.935  | 0           | 5000.0         | 1495.93       |
| 27.54         | 16.0107      | 7.435        | 0        | 0        | 49.405        | 21.615        | 9.335         | 7.35         | 0        | 0           | 344.15         | 111.485       |
| 18.29         | 8.24         | 1.97         | 0        | 0        | 211.64        | 1.735         | 2.485         | 0            | 0        | 0.565       | 2587.28        | 734.835       |
| <b>24.635</b> | <b>13.57</b> | <b>5.145</b> | <b>0</b> | <b>0</b> | <b>168.83</b> | <b>45.415</b> | <b>14.085</b> | <b>7.025</b> | <b>0</b> | <b>0</b>    | <b>744.025</b> | <b>571.63</b> |
| <b>22.325</b> | <b>8.635</b> | <b>1.05</b>  | <b>0</b> | <b>0</b> | <b>0.535</b>  | <b>0.5</b>    | <b>1.615</b>  | <b>1.425</b> | <b>0</b> | <b>0.11</b> | <b>150.78</b>  | <b>30.645</b> |

gut IL-1a   gut IL-1b   gut IL-2   gut IL-4   gut IL-5   gut IL-6   gut IL-10   gut IL-12 (p70)   gut IL-12 (p70)   gut IL-13   gut IL-17   gut IP-10   gut KC  
 gut   gut

gut IL-1a   gut IL-1b   gut IL-2   gut IL-4   gut IL-5   gut IL-6   gut IL-10   gut IL-12 (p70)   gut IL-12 (p70)   gut IL-13   gut IL-17   gut IP-10   gut KC

|        |        |        |        |       |        |        |        |        |          |        |         |         |
|--------|--------|--------|--------|-------|--------|--------|--------|--------|----------|--------|---------|---------|
| 57.685 | 6.225  | 2.29   | 0      | 0     | 4.655  | 2.99   | 5.03   | 3.43   | 15.62    | 0.165  | 111.485 | 23.48   |
| 31.345 | 12.105 | 2.5    | 0      | 0     | 19.845 | 0.195  | 6.1    | 10.92  | 26.285   | 0.27   | 550.45  | 346.16  |
| 566.7  | 152.44 | 33.965 | 24.325 | 39.48 | 13.825 | 255.19 | 37.385 | 178.53 | 1013.515 | 99.925 | 452.96  | 1263.29 |
| 39.1   | 22.53  | 5.715  | 0      | 0.525 | 550.67 | 1.62   | 6.93   | 0      | 0        | 16.33  | 570.595 | 538.905 |
| 16.74  | 13.19  | 1.505  | 0      | 2.34  | 85.98  | 0.54   | 2.575  | 0      | 0        | 11.685 | 195.14  | 202.675 |
| 21.83  | 82.66  | 7.975  | 0      | 0     | 2.24   | 1.04   | 0      | 0      | 25.89    | 16.93  | 110.68  | 22.705  |
| 13.77  | 13.19  | 2.785  | 0      | 0     | 1.97   | 0.94   | 4.545  | 0      | 0        | 25.245 | 117.905 | 11.78   |

|       |      |   |   |   |       |      |       |   |   |       |         |        |
|-------|------|---|---|---|-------|------|-------|---|---|-------|---------|--------|
| 0.545 | 0    | 0 | 0 | 0 | 0.895 | 3.71 | 5.42  | 0 | 0 | 9.99  | 77.92   | 12.055 |
| 2.785 | 0    | 0 | 0 | 0 | 0.765 | 5.65 | 9.765 | 0 | 0 | 2.07  | 73.385  | 2.84   |
| 3.75  | 0.91 | 0 | 0 | 0 | 0.835 | 5.2  | 6.005 | 0 | 0 | 4.695 | 114.165 | 7.325  |

|        |        |       |      |       |        |       |        |   |         |       |         |         |
|--------|--------|-------|------|-------|--------|-------|--------|---|---------|-------|---------|---------|
| 69.04  | 22.315 | 9.035 | 1.03 | 0.125 | 93.305 | 12.51 | 12.595 | 0 | 171.385 | 0     | 375.635 | 741.77  |
| 25.725 | 6.335  | 6.115 | 0.96 | 0     | 32.93  | 7.56  | 7.425  | 0 | 86.46   | 0     | 249.43  | 671.665 |
| 4.895  | 1.595  | 0     | 0    | 0     | 24.945 | 4.18  | 6.155  | 0 | 0       | 9.095 | 302.675 | 968.67  |

|         |         |       |        |        |        |        |        |        |          |         |         |          |
|---------|---------|-------|--------|--------|--------|--------|--------|--------|----------|---------|---------|----------|
| 8.185   | 0       | 0.02  | 0      | 0      | 4.255  | 1.265  | 2.545  | 0      | 0        | 7.655   | 370.995 | 150.3    |
| 9.285   | 3.825   | 0     | 0      | 0      | 11.24  | 2.735  | 0.135  | 0      | 0        | 0       | 497.7   | 468.79   |
| 1564.28 | 741.235 | 67.94 | 80.235 | 190.14 | 23.585 | 506.24 | 100.36 | 445.89 | 2756.705 | 576.265 | 393.37  | 1669.055 |

|        |        |        |   |   |       |       |       |       |   |     |        |         |
|--------|--------|--------|---|---|-------|-------|-------|-------|---|-----|--------|---------|
| 27.925 | 17.32  | 6.935  | 0 | 0 | 43.02 | 2.84  | 18.67 | 10.25 | 0 | 0   | 117.34 | 175.805 |
| 95.4   | 14.295 | 12.605 | 0 | 0 | 7.07  | 9.515 | 5.925 | 9.28  | 0 | 0.7 | 38.2   | 13.445  |

|       |        |       |   |   |        |      |        |        |   |       |        |        |
|-------|--------|-------|---|---|--------|------|--------|--------|---|-------|--------|--------|
| 51.77 | 20.885 | 12.26 | 0 | 0 | 64.615 | 3.02 | 20.225 | 12.965 | 0 | 0.505 | 136.15 | 306.48 |
|-------|--------|-------|---|---|--------|------|--------|--------|---|-------|--------|--------|

|       |        |      |   |       |        |        |      |       |        |        |         |         |
|-------|--------|------|---|-------|--------|--------|------|-------|--------|--------|---------|---------|
| 6.28  | 14.295 | 1.04 | 0 | 5.985 | 121.9  | 0.54   | 0    | 0     | 0      | 65.145 | 330.915 | 250.825 |
| 34.75 | 20.885 | 8.25 | 0 | 0     | 93.595 | 12.885 | 11.5 | 78.01 | 24.525 | 14.425 | 270.53  | 197.185 |
| 7.55  | 14.825 | 1.93 | 0 | 0     | 51.225 | 0.54   | 2.19 | 0     | 0      | 21.195 | 109.5   | 119     |

|        |        |       |   |   |       |       |       |   |   |        |         |        |
|--------|--------|-------|---|---|-------|-------|-------|---|---|--------|---------|--------|
| 9.935  | 14.295 | 2.145 | 0 | 0 | 6.035 | 1.14  | 2.095 | 0 | 0 | 13.065 | 84.81   | 20.75  |
| 13.245 | 10.77  | 2.145 | 0 | 0 | 7.915 | 1.335 | 0     | 0 | 0 | 0      | 104.375 | 33.035 |
| 12.385 | 12.02  | 1.47  | 0 | 0 | 1.06  | 0.54  | 3.145 | 0 | 0 | 0      | 47.905  | 12.78  |

|        |       |        |   |   |       |      |       |   |   |       |        |        |
|--------|-------|--------|---|---|-------|------|-------|---|---|-------|--------|--------|
| 26.79  | 0     | 10.845 | 0 | 0 | 3.335 | 3.02 | 6.475 | 0 | 0 | 0     | 75.81  | 10.475 |
| 54.185 | 7.915 | 14.925 | 0 | 0 | 9.795 | 6.59 | 6.2   | 0 | 0 | 2.575 | 68.475 | 10.065 |

| gut    | gut    | gut   | gut   | gut   | gut   | gut    | gut          | gut          | gut    | gut    | gut     | gut    |
|--------|--------|-------|-------|-------|-------|--------|--------------|--------------|--------|--------|---------|--------|
| gIL-1a | gIL-1b | gIL-2 | gIL-4 | gIL-5 | gIL-6 | gIL-10 | gIL-12 (p40) | gIL-12 (p70) | gIL-13 | gIL-17 | gIP-10  | gKC    |
| 57.685 | 6.225  | 2.29  | 0     | 0     | 4.655 | 2.99   | 5.03         | 3.43         | 15.62  | 0.165  | 111.485 | 23.48  |
| 0.545  | 0      | 0     | 0     | 0     | 0.895 | 3.71   | 5.42         | 0            | 0      | 9.99   | 77.92   | 12.055 |
| 2.785  | 0      | 0     | 0     | 0     | 0.765 | 5.65   | 9.765        | 0            | 0      | 2.07   | 73.385  | 2.84   |
| 3.75   | 0.91   | 0     | 0     | 0     | 0.835 | 5.2    | 6.005        | 0            | 0      | 4.695  | 114.165 | 7.325  |

| gIL-1a | gIL-1b | gIL-2  | gIL-4  | gIL-5 | gIL-6  | gIL-10 | gIL-12 (p40) | gIL-12 (p70) | gIL-13   | gIL-17 | gIP-10  | gKC     |
|--------|--------|--------|--------|-------|--------|--------|--------------|--------------|----------|--------|---------|---------|
| 31.345 | 12.105 | 2.5    | 0      | 0     | 19.845 | 0.195  | 6.1          | 10.92        | 26.285   | 0.27   | 550.45  | 346.16  |
| 566.7  | 152.44 | 33.965 | 24.325 | 39.48 | 13.825 | 255.19 | 37.385       | 178.53       | 1013.515 | 99.925 | 452.96  | 1263.29 |
| 39.1   | 22.53  | 5.715  | 0      | 0.525 | 550.67 | 1.62   | 6.93         | 0            | 0        | 16.33  | 570.595 | 538.905 |
| 16.74  | 13.19  | 1.505  | 0      | 2.34  | 85.98  | 0.54   | 2.575        | 0            | 0        | 11.685 | 195.14  | 202.675 |
| 21.83  | 82.66  | 7.975  | 0      | 0     | 2.24   | 1.04   | 0            | 0            | 25.89    | 16.93  | 110.68  | 22.705  |
| 13.77  | 13.19  | 2.785  | 0      | 0     | 1.97   | 0.94   | 4.545        | 0            | 0        | 25.245 | 117.905 | 11.78   |

|       |        |       |      |       |        |       |        |   |         |   |         |        |
|-------|--------|-------|------|-------|--------|-------|--------|---|---------|---|---------|--------|
| 69.04 | 22.315 | 9.035 | 1.03 | 0.125 | 93.305 | 12.51 | 12.595 | 0 | 171.385 | 0 | 375.635 | 741.77 |
|-------|--------|-------|------|-------|--------|-------|--------|---|---------|---|---------|--------|

|         |         |        |        |        |        |        |        |        |          |         |         |          |
|---------|---------|--------|--------|--------|--------|--------|--------|--------|----------|---------|---------|----------|
| 25.725  | 6.335   | 6.115  | 0.96   | 0      | 32.93  | 7.56   | 7.425  | 0      | 86.46    | 0       | 249.43  | 671.665  |
| 4.895   | 1.595   | 0      | 0      | 0      | 24.945 | 4.18   | 6.155  | 0      | 0        | 9.095   | 302.675 | 968.67   |
| 8.185   | 0       | 0.02   | 0      | 0      | 4.255  | 1.265  | 2.545  | 0      | 0        | 7.655   | 370.995 | 150.3    |
| 9.285   | 3.825   | 0      | 0      | 0      | 11.24  | 2.735  | 0.135  | 0      | 0        | 0       | 497.7   | 468.79   |
| 1564.28 | 741.235 | 67.94  | 80.235 | 190.14 | 23.585 | 506.24 | 100.36 | 445.89 | 2756.705 | 576.265 | 393.37  | 1669.055 |
| 27.925  | 17.32   | 6.935  | 0      | 0      | 43.02  | 2.84   | 18.67  | 10.25  | 0        | 0       | 117.34  | 175.805  |
| 95.4    | 14.295  | 12.605 | 0      | 0      | 7.07   | 9.515  | 5.925  | 9.28   | 0        | 0.7     | 38.2    | 13.445   |
| 51.77   | 20.885  | 12.26  | 0      | 0      | 64.615 | 3.02   | 20.225 | 12.965 | 0        | 0.505   | 136.15  | 306.48   |
| 6.28    | 14.295  | 1.04   | 0      | 5.985  | 121.9  | 0.54   | 0      | 0      | 0        | 65.145  | 330.915 | 250.825  |
| 34.75   | 20.885  | 8.25   | 0      | 0      | 93.595 | 12.885 | 11.5   | 78.01  | 24.525   | 14.425  | 270.53  | 197.185  |
| 7.55    | 14.825  | 1.93   | 0      | 0      | 51.225 | 0.54   | 2.19   | 0      | 0        | 21.195  | 109.5   | 119      |
| 9.935   | 14.295  | 2.145  | 0      | 0      | 6.035  | 1.14   | 2.095  | 0      | 0        | 13.065  | 84.81   | 20.75    |
| 13.245  | 10.77   | 2.145  | 0      | 0      | 7.915  | 1.335  | 0      | 0      | 0        | 0       | 104.375 | 33.035   |
| 12.385  | 12.02   | 1.47   | 0      | 0      | 1.06   | 0.54   | 3.145  | 0      | 0        | 0       | 47.905  | 12.78    |
| 26.79   | 0       | 10.845 | 0      | 0      | 3.335  | 3.02   | 6.475  | 0      | 0        | 0       | 75.81   | 10.475   |
| 54.185  | 7.915   | 14.925 | 0      | 0      | 9.795  | 6.59   | 6.2    | 0      | 0        | 2.575   | 68.475  | 10.065   |



| gut MCP-1 | gut MIG | gut MIP-1a | gut TNFa | gut VEGF | spleen GM-C! | spleen IFN- | spleen IL-1 | spleen IL-1 | spleen IL-2 | spleen IL-4 | spleen IL-5 | spleen IL-6 |
|-----------|---------|------------|----------|----------|--------------|-------------|-------------|-------------|-------------|-------------|-------------|-------------|
| gut       | gut     | gut        | gut      | gut      | Spleen       | Spleen      | Spleen      | Spleen      | Spleen      | Spleen      | Spleen      | Spleen      |

gut MCP-1 gut MIG gut MIP-1a gut TNFa gut VEGF spleen GM-C! spleen IFN- spleen IL-1 spleen IL-1 spleen IL-2 spleen IL-4 spleen IL-5 spleen IL-6

|          |          |         |        |        |        |         |         |          |        |       |       |          |
|----------|----------|---------|--------|--------|--------|---------|---------|----------|--------|-------|-------|----------|
| 4.755    | 224.675  | 12.25   | 2.09   | 19.815 | 0      | 17.965  | 13.41   | 9.895    | 3.41   | 1.825 | 1.145 | 9.505    |
| 107.645  | 156.6    | 9.52    | 2.135  | 23.505 | 0      | 6.985   | 20.41   | 117.725  | 1.315  | 1.84  | 1.255 | 319.28   |
| 952.465  | 4234.44  | 129.195 | 2.51   | 16.69  | 27.755 | 5.53    | 21.645  | 101.53   | 1.645  | 1.925 | 1.48  | 926.35   |
| 1467.6   | 3362.73  | 73.04   | 2.325  | 84.26  | 57.03  | 175.67  | 261.72  | 124.585  | 4.235  | 1.45  | 0.61  | 813.47   |
| 831.065  | 13060.58 | 28.69   | 0      | 65.5   | 49.9   | 73.32   | 236.905 | 83.7968  | 14.825 | 0     | 3.665 | 523.07   |
| 686.995  | 15715.28 | 46.29   | 1.705  | 60.785 | 64.57  | 25.35   | 601.89  | 151.095  | 3.545  | 1.3   | 0.295 | 505.435  |
| 124.38   | 3321.795 | 53.56   | 0      | 7.98   | 13.565 | 15.43   | 84.92   | 27.195   | 0.54   | 0     | 0     | 28.385   |
| 3.795    | 348.395  | 0       | 2.065  | 25.47  | 0      | 7.645   | 6.075   | 6.89     | 1.605  | 1.825 | 1.145 | 7.815    |
| 1101.45  | 287.155  | 204.275 | 17.945 | 20.81  | 20.305 | 16.555  | 44.225  | 84.71    | 2.645  | 2.185 | 1.425 | 1617.785 |
| 972.11   | 4764.5   | 61.85   | 2.41   | 42.44  | 33.22  | 41.395  | 58.865  | 204.235  | 4.195  | 1.94  | 1.405 | 399.87   |
| 1375.09  | 8919.835 | 101.635 | 2.175  | 77.54  | 55.35  | 178.93  | 233.935 | 97.755   | 3.985  | 1.34  | 0     | 618.825  |
| 445.1    | 6015.505 | 27.29   | 0      | 32.88  | 35.265 | 31.68   | 115.645 | 33.3079  | 5.075  | 0     | 0     | 110.765  |
| 0        | 348.9    | 0       | 0.885  | 13.065 | 0      | 26.955  | 27.215  | 6.335    | 4.22   | 1.125 | 0     | 9.265    |
| 82.795   | 262.425  | 31.055  | 0      | 13.83  | 0      | 15.545  | 44.2    | 16.565   | 0.13   | 0     | 0     | 4.05     |
| 2.395    | 203.71   | 0       | 2.055  | 27.81  | 0      | 6.89    | 9.46    | 6.505    | 1.195  | 1.845 | 1.145 | 1.335    |
| 918.49   | 375.17   | 246.96  | 15.27  | 13.405 | 29.7   | 7.505   | 34.695  | 119.45   | 1.98   | 2.72  | 1.535 | 2948.085 |
| 1127.69  | 4106.27  | 104.49  | 2.55   | 27.095 | 20.305 | 35.32   | 55.68   | 119.45   | 2.155  | 2.005 | 1.275 | 1132.73  |
| 867.04   | 6506.875 | 41.36   | 0      | 60.755 | 46.65  | 60.8    | 221.495 | 150.5371 | 3.59   | 0     | 0     | 709.39   |
| 427.065  | 8356.235 | 21.325  | 0      | 23.71  | 51.145 | 45.055  | 216.91  | 114.6811 | 6.435  | 0     | 0     | 487.255  |
| 78.175   | 1376.06  | 21.325  | 0      | 18.385 | 35.265 | 9.67    | 176.395 | 56.7886  | 0.51   | 0     | 0     | 85.905   |
| 64.36    | 645.09   | 9.785   | 0      | 2.275  | 0      | 24.53   | 59.14   | 21.6     | 0.96   | 0     | 0     | 21.35    |
| 3.12     | 183.21   | 0       | 2.115  | 20.33  | 3.57   | 7.365   | 10.14   | 5.73     | 1.31   | 1.87  | 1.2   | 0.765    |
| 844.67   | 289.525  | 207.11  | 16.12  | 18.12  | 48.42  | 5.96    | 44.645  | 199.295  | 1.74   | 2.695 | 1.59  | 4394.45  |
| 1391.065 | 2452.045 | 137.675 | 3.95   | 20.645 | 95.405 | 134.295 | 351.48  | 360.795  | 4.565  | 1.97  | 0.69  | 1667.505 |
| 653.13   | 7186.695 | 30.06   | 0      | 85.92  | 43.17  | 32.1    | 310.94  | 190.7589 | 5.74   | 0     | 0     | 489.55   |
| 645.765  | 9080.615 | 27.29   | 0      | 39.34  | 40.185 | 28.745  | 234.025 | 133.1735 | 5.55   | 0     | 0     | 549.385  |

|                |                 |               |          |               |               |               |               |                 |              |          |          |                |
|----------------|-----------------|---------------|----------|---------------|---------------|---------------|---------------|-----------------|--------------|----------|----------|----------------|
| 292.92         | 5058.795        | 32.72         | 0        | 34.675        | 0             | 2.7           | 133.065       | 42.9027         | 0            | 0        | 0        | 10.565         |
| 34.465         | 1004.205        | 50.235        | 0        | 4.705         | 2.835         | 24.53         | 139.11        | 29.255          | 1.345        | 0        | 0        | 22.115         |
| 47.2           | 212.845         | 25.205        | 1.385    | 49.34         | 0             | 25.92         | 17.515        | 22.315          | 3.765        | 1.38     | 0.03     | 4.415          |
| 338.675        | 319.19          | 101.635       | 17.76    | 25.945        | 37.985        | 16.9          | 103.445       | 120.66          | 3.965        | 1.56     | 0        | 416.745        |
| 1248.185       | 11522.34        | 157.14        | 3.95     | 71.435        | 72.255        | 129.985       | 309.305       | 229.225         | 4.445        | 1.665    | 0.125    | 1872.72        |
| 838.61         | 5556.99         | 30.06         | 0        | 54.4          | 6.4           | 18.12         | 60.69         | 35.2584         | 3.555        | 0.35     | 0        | 28.895         |
| 826.61         | 8250.47         | 20.09         | 0        | 42.82         | 15.295        | 111.265       | 134.695       | 82.22           | 0.76         | 0        | 0        | 543.215        |
| 412.18         | 8400.19         | 21.325        | 0        | 157.48        | 0             | 7.31          | 402.235       | 163.2859        | 0            | 0        | 0        | 529.36         |
| 72.83          | 925.865         | 13.77         | 0.485    | 22.055        | 0             | 8.485         | 22.65         | 7.44            | 0.495        | 0        | 0        | 2.4            |
| 614.445        | 258.24          | 172.075       | 17.19    | 13.425        | 67.27         | 23.17         | 181.715       | 248.88          | 3.72         | 2.6      | 0.125    | 980.01         |
| 1401.225       | 11396.48        | 155.72        | 3.22     | 43.205        | 78.945        | 135.975       | 249.075       | 203.375         | 4.02         | 1.745    | 0.125    | 1362.405       |
| 128.19         | 1437.67         | 18.045        | 0        | 32.215        | 39.405        | 19.54         | 235.705       | 97.9151         | 2.275        | 0        | 0        | 189.26         |
| 564.67         | 7777.545        | 33.3          | 0        | 28.835        | 19.78         | 84.905        | 206.75        | 107.63          | 0.4          | 0        | 0        | 589.165        |
| <b>339.155</b> | <b>4104.585</b> | <b>16.3</b>   | <b>0</b> | <b>44.505</b> | <b>40.185</b> | <b>13.785</b> | <b>267.08</b> | <b>129.0982</b> | <b>1.545</b> | <b>0</b> | <b>0</b> | <b>294.465</b> |
| <b>52.84</b>   | <b>771.74</b>   | <b>11.435</b> | <b>0</b> | <b>5.97</b>   | <b>0</b>      | <b>11.06</b>  | <b>59.71</b>  | <b>19.465</b>   | <b>0.12</b>  | <b>0</b> | <b>0</b> | <b>16.715</b>  |

| gut    | gut     | gut     | gut   | gut    | Spleen  | Spleen | Spleen | Spleen | Spleen | Spleen | Spleen | Spleen |
|--------|---------|---------|-------|--------|---------|--------|--------|--------|--------|--------|--------|--------|
| gMCP-1 | gMIG    | gMIP-1a | gTNFa | gVEGF  | sGM-CSF | sIFN-g | sIL-1a | sIL-1b | sIL-2  | sIL-4  | sIL-5  | sIL-6  |
| 4.755  | 224.675 | 12.25   | 2.09  | 19.815 | 0       | 17.965 | 13.41  | 9.895  | 3.41   | 1.825  | 1.145  | 9.505  |
| 3.795  | 348.395 | 0       | 2.065 | 25.47  | 0       | 7.645  | 6.075  | 6.89   | 1.605  | 1.825  | 1.145  | 7.815  |
| 2.395  | 203.71  | 0       | 2.055 | 27.81  | 0       | 6.89   | 9.46   | 6.505  | 1.195  | 1.845  | 1.145  | 1.335  |
| 3.12   | 183.21  | 0       | 2.115 | 20.33  | 3.57    | 7.365  | 10.14  | 5.73   | 1.31   | 1.87   | 1.2    | 0.765  |
| 47.2   | 212.845 | 25.205  | 1.385 | 49.34  | 0       | 25.92  | 17.515 | 22.315 | 3.765  | 1.38   | 0.03   | 4.415  |

| gMCP-1  | gMIG    | gMIP-1a | gTNFa | gVEGF  | sGM-CSF | sIFN-g | sIL-1a | sIL-1b  | sIL-2 | sIL-4 | sIL-5 | sIL-6  |
|---------|---------|---------|-------|--------|---------|--------|--------|---------|-------|-------|-------|--------|
| 107.645 | 156.6   | 9.52    | 2.135 | 23.505 | 0       | 6.985  | 20.41  | 117.725 | 1.315 | 1.84  | 1.255 | 319.28 |
| 952.465 | 4234.44 | 129.195 | 2.51  | 16.69  | 27.755  | 5.53   | 21.645 | 101.53  | 1.645 | 1.925 | 1.48  | 926.35 |

|          |          |         |        |        |        |         |         |          |        |       |       |          |
|----------|----------|---------|--------|--------|--------|---------|---------|----------|--------|-------|-------|----------|
| 1467.6   | 3362.73  | 73.04   | 2.325  | 84.26  | 57.03  | 175.67  | 261.72  | 124.585  | 4.235  | 1.45  | 0.61  | 813.47   |
| 831.065  | 13060.58 | 28.69   | 0      | 65.5   | 49.9   | 73.32   | 236.905 | 83.7968  | 14.825 | 0     | 3.665 | 523.07   |
| 686.995  | 15715.28 | 46.29   | 1.705  | 60.785 | 64.57  | 25.35   | 601.89  | 151.095  | 3.545  | 1.3   | 0.295 | 505.435  |
| 124.38   | 3321.795 | 53.56   | 0      | 7.98   | 13.565 | 15.43   | 84.92   | 27.195   | 0.54   | 0     | 0     | 28.385   |
| 1101.45  | 287.155  | 204.275 | 17.945 | 20.81  | 20.305 | 16.555  | 44.225  | 84.71    | 2.645  | 2.185 | 1.425 | 1617.785 |
| 972.11   | 4764.5   | 61.85   | 2.41   | 42.44  | 33.22  | 41.395  | 58.865  | 204.235  | 4.195  | 1.94  | 1.405 | 399.87   |
| 1375.09  | 8919.835 | 101.635 | 2.175  | 77.54  | 55.35  | 178.93  | 233.935 | 97.755   | 3.985  | 1.34  | 0     | 618.825  |
| 445.1    | 6015.505 | 27.29   | 0      | 32.88  | 35.265 | 31.68   | 115.645 | 33.3079  | 5.075  | 0     | 0     | 110.765  |
| 0        | 348.9    | 0       | 0.885  | 13.065 | 0      | 26.955  | 27.215  | 6.335    | 4.22   | 1.125 | 0     | 9.265    |
| 82.795   | 262.425  | 31.055  | 0      | 13.83  | 0      | 15.545  | 44.2    | 16.565   | 0.13   | 0     | 0     | 4.05     |
| 918.49   | 375.17   | 246.96  | 15.27  | 13.405 | 29.7   | 7.505   | 34.695  | 119.45   | 1.98   | 2.72  | 1.535 | 2948.085 |
| 1127.69  | 4106.27  | 104.49  | 2.55   | 27.095 | 20.305 | 35.32   | 55.68   | 119.45   | 2.155  | 2.005 | 1.275 | 1132.73  |
| 867.04   | 6506.875 | 41.36   | 0      | 60.755 | 46.65  | 60.8    | 221.495 | 150.5371 | 3.59   | 0     | 0     | 709.39   |
| 427.065  | 8356.235 | 21.325  | 0      | 23.71  | 51.145 | 45.055  | 216.91  | 114.6811 | 6.435  | 0     | 0     | 487.255  |
| 78.175   | 1376.06  | 21.325  | 0      | 18.385 | 35.265 | 9.67    | 176.395 | 56.7886  | 0.51   | 0     | 0     | 85.905   |
| 64.36    | 645.09   | 9.785   | 0      | 2.275  | 0      | 24.53   | 59.14   | 21.6     | 0.96   | 0     | 0     | 21.35    |
| 844.67   | 289.525  | 207.11  | 16.12  | 18.12  | 48.42  | 5.96    | 44.645  | 199.295  | 1.74   | 2.695 | 1.59  | 4394.45  |
| 1391.065 | 2452.045 | 137.675 | 3.95   | 20.645 | 95.405 | 134.295 | 351.48  | 360.795  | 4.565  | 1.97  | 0.69  | 1667.505 |
| 653.13   | 7186.695 | 30.06   | 0      | 85.92  | 43.17  | 32.1    | 310.94  | 190.7589 | 5.74   | 0     | 0     | 489.55   |
| 645.765  | 9080.615 | 27.29   | 0      | 39.34  | 40.185 | 28.745  | 234.025 | 133.1735 | 5.55   | 0     | 0     | 549.385  |
| 292.92   | 5058.795 | 32.72   | 0      | 34.675 | 0      | 2.7     | 133.065 | 42.9027  | 0      | 0     | 0     | 10.565   |
| 34.465   | 1004.205 | 50.235  | 0      | 4.705  | 2.835  | 24.53   | 139.11  | 29.255   | 1.345  | 0     | 0     | 22.115   |
| 338.675  | 319.19   | 101.635 | 17.76  | 25.945 | 37.985 | 16.9    | 103.445 | 120.66   | 3.965  | 1.56  | 0     | 416.745  |
| 1248.185 | 11522.34 | 157.14  | 3.95   | 71.435 | 72.255 | 129.985 | 309.305 | 229.225  | 4.445  | 1.665 | 0.125 | 1872.72  |
| 838.61   | 5556.99  | 30.06   | 0      | 54.4   | 6.4    | 18.12   | 60.69   | 35.2584  | 3.555  | 0.35  | 0     | 28.895   |
| 826.61   | 8250.47  | 20.09   | 0      | 42.82  | 15.295 | 111.265 | 134.695 | 82.22    | 0.76   | 0     | 0     | 543.215  |
| 412.18   | 8400.19  | 21.325  | 0      | 157.48 | 0      | 7.31    | 402.235 | 163.2859 | 0      | 0     | 0     | 529.36   |
| 72.83    | 925.865  | 13.77   | 0.485  | 22.055 | 0      | 8.485   | 22.65   | 7.44     | 0.495  | 0     | 0     | 2.4      |
| 614.445  | 258.24   | 172.075 | 17.19  | 13.425 | 67.27  | 23.17   | 181.715 | 248.88   | 3.72   | 2.6   | 0.125 | 980.01   |

|                |                 |               |          |               |               |               |               |                 |              |          |          |                |
|----------------|-----------------|---------------|----------|---------------|---------------|---------------|---------------|-----------------|--------------|----------|----------|----------------|
| 1401.225       | 11396.48        | 155.72        | 3.22     | 43.205        | 78.945        | 135.975       | 249.075       | 203.375         | 4.02         | 1.745    | 0.125    | 1362.405       |
| 128.19         | 1437.67         | 18.045        | 0        | 32.215        | 39.405        | 19.54         | 235.705       | 97.9151         | 2.275        | 0        | 0        | 189.26         |
| 564.67         | 7777.545        | 33.3          | 0        | 28.835        | 19.78         | 84.905        | 206.75        | 107.63          | 0.4          | 0        | 0        | 589.165        |
| <b>339.155</b> | <b>4104.585</b> | <b>16.3</b>   | <b>0</b> | <b>44.505</b> | <b>40.185</b> | <b>13.785</b> | <b>267.08</b> | <b>129.0982</b> | <b>1.545</b> | <b>0</b> | <b>0</b> | <b>294.465</b> |
| <b>52.84</b>   | <b>771.74</b>   | <b>11.435</b> | <b>0</b> | <b>5.97</b>   | <b>0</b>      | <b>11.06</b>  | <b>59.71</b>  | <b>19.465</b>   | <b>0.12</b>  | <b>0</b> | <b>0</b> | <b>16.715</b>  |

gut MCP-1   gut MIG   gut MIP-1a   gut TNFa   gut VEGF   spleen GM-CSf   spleen IFN-   spleen IL-1   spleen IL-1   spleen IL-2   spleen IL-4   spleen IL-5   spleen IL-6  
 gut   gut   gut   gut   gut   Spleen   Spleen   Spleen   Spleen   Spleen   Spleen   Spleen   Spleen

gut MCP-1   gut MIG   gut MIP-1a   gut TNFa   gut VEGF   spleen GM-CSf   spleen IFN-   spleen IL-1   spleen IL-1   spleen IL-2   spleen IL-4   spleen IL-5   spleen IL-6

|         |          |         |       |        |        |       |        |        |       |       |   |        |
|---------|----------|---------|-------|--------|--------|-------|--------|--------|-------|-------|---|--------|
| 14.14   | 671.85   | 6.125   | 0     | 14.49  | 0      | 11    | 16.385 | 6.635  | 0.355 | 0     | 0 | 10.35  |
| 90.685  | 1452.935 | 40.78   | 4.065 | 29.585 | 0      | 12.4  | 23.46  | 28.57  | 0.265 | 0     | 0 | 95.895 |
| 947.82  | 1760.985 | 518.435 | 2.815 | 175.6  | 9.31   | 0     | 106.04 | 32.61  | 0.18  | 0     | 0 | 34.05  |
| 590.67  | 1652.235 | 40.025  | 1.89  | 34.025 | 12.375 | 13.41 | 52.8   | 33.77  | 4.875 | 0     | 0 | 40.12  |
| 301.565 | 971.125  | 24.475  | 1.095 | 35.05  | 0      | 1.04  | 67.27  | 87.34  | 4.855 | 0     | 0 | 47.485 |
| 39.615  | 1764.86  | 22.985  | 0.085 | 21.41  | 0      | 10.39 | 27.49  | 44.74  | 5.56  | 0     | 0 | 1.97   |
| 54.665  | 1153.875 | 19.78   | 2.16  | 39.475 | 12.375 | 18.82 | 30.245 | 45.805 | 6.625 | 3.825 | 0 | 2.89   |

|        |         |        |       |        |       |   |      |       |       |       |   |       |
|--------|---------|--------|-------|--------|-------|---|------|-------|-------|-------|---|-------|
| 17.285 | 938.65  | 0      | 0     | 36.225 | 9.31  | 0 | 6.45 | 4.805 | 0.21  | 0     | 0 | 3.255 |
| 17.61  | 940.48  | 0      | 0     | 56.015 | 0     | 0 | 6.22 | 0     | 0.34  | 0     | 0 | 0.62  |
| 28.83  | 1960.45 | 29.105 | 0.165 | 42.235 | 3.015 | 0 | 8.59 | 4.325 | 0.615 | 3.815 | 0 | 0.105 |

|         |         |        |       |        |        |       |        |        |       |       |   |         |
|---------|---------|--------|-------|--------|--------|-------|--------|--------|-------|-------|---|---------|
| 387.445 | 713.71  | 0      | 4.235 | 16.495 | 65.94  | 22.83 | 31.585 | 68.88  | 3.72  | 1.645 | 0 | 564.565 |
| 491.745 | 342.765 | 0      | 3.805 | 19.545 | 31.425 | 15.09 | 28.585 | 81.785 | 3.86  | 1.42  | 0 | 761.795 |
| 943.355 | 1174    | 64.105 | 1.575 | 18.515 | 43.74  | 0     | 46.515 | 85.795 | 0.225 | 0     | 0 | 369.265 |

|         |          |          |        |         |      |   |         |       |      |   |   |        |
|---------|----------|----------|--------|---------|------|---|---------|-------|------|---|---|--------|
| 221.09  | 4250.55  | 31.87    | 0      | 70.26   | 6.81 | 0 | 135.565 | 19.15 | 0.11 | 0 | 0 | 18.125 |
| 443.915 | 1781.115 | 44.29    | 0      | 124.435 | 0    | 0 | 11.56   | 3.825 | 0.07 | 0 | 0 | 0.245  |
| 1237.02 | 2258.13  | 1309.805 | 22.155 | 161.85  | 0    | 0 | 130.46  | 22.85 | 0.08 | 0 | 0 | 83.515 |

|        |         |        |       |       |        |        |       |        |       |       |   |        |
|--------|---------|--------|-------|-------|--------|--------|-------|--------|-------|-------|---|--------|
| 283.84 | 553.365 | 16.145 | 0.805 | 34.43 | 20.805 | 14.785 | 52.8  | 48.925 | 5.625 | 0     | 0 | 118.51 |
| 46.455 | 62.465  | 22.985 | 3.4   | 18.71 | 20.805 | 19.32  | 43.79 | 99.89  | 9.445 | 0.225 | 0 | 7.185  |

|        |        |       |       |       |        |       |       |        |      |      |       |        |
|--------|--------|-------|-------|-------|--------|-------|-------|--------|------|------|-------|--------|
| 339.78 | 911.05 | 19.78 | 3.175 | 13.49 | 12.375 | 15.31 | 47.75 | 61.855 | 7.29 | 0.39 | 3.965 | 42.835 |
|--------|--------|-------|-------|-------|--------|-------|-------|--------|------|------|-------|--------|

|         |         |        |       |       |        |       |        |         |        |       |       |        |
|---------|---------|--------|-------|-------|--------|-------|--------|---------|--------|-------|-------|--------|
| 412.64  | 1583.56 | 37.94  | 0.03  | 14.79 | 12.375 | 2.97  | 79.135 | 140.685 | 10.37  | 0.295 | 4.415 | 54.395 |
| 504.955 | 1290.28 | 33.5   | 1.495 | 39.02 | 0      | 2.97  | 72.995 | 308.97  | 17.515 | 0.36  | 0     | 58.695 |
| 222.75  | 854.01  | 22.985 | 1.535 | 26.15 | 20.805 | 3.185 | 102.53 | 132.845 | 9.63   | 0.735 | 0     | 28.555 |

|        |         |        |       |        |   |       |        |        |       |       |   |       |
|--------|---------|--------|-------|--------|---|-------|--------|--------|-------|-------|---|-------|
| 73.865 | 482.09  | 31.115 | 0.68  | 12.54  | 0 | 3.185 | 27.23  | 23.325 | 5.67  | 0     | 0 | 8.085 |
| 66.535 | 1751.62 | 11.785 | 1.775 | 10.06  | 0 | 3.4   | 18.315 | 14.295 | 3.99  | 0.025 | 0 | 5.1   |
| 52.445 | 356.055 | 11.785 | 0.89  | 39.545 | 0 | 0     | 29.565 | 58.18  | 7.245 | 0     | 0 | 3.89  |

|        |         |   |   |       |        |        |        |         |        |       |       |       |
|--------|---------|---|---|-------|--------|--------|--------|---------|--------|-------|-------|-------|
| 33.185 | 1042.02 | 0 | 0 | 8.03  | 12.375 | 10.555 | 29.395 | 15.345  | 6.065  | 0.595 | 0.525 | 5.92  |
| 27.41  | 659.735 | 0 | 0 | 33.35 | 20.805 | 3.08   | 25.11  | 316.845 | 14.845 | 1.28  | 0     | 1.835 |

| pg/mg  |         |         |       |        |         |        |        |        |        |        |        |        |
|--------|---------|---------|-------|--------|---------|--------|--------|--------|--------|--------|--------|--------|
| gut    | gut     | gut     | gut   | gut    | Spleen  | Spleen | Spleen | Spleen | Spleen | Spleen | Spleen | Spleen |
| gMCP-1 | gMIG    | gMIP-1a | gTNFa | gVEGF  | sGM-CSF | sIFN-g | sIL-1a | sIL-1b | sIL-2  | sIL-4  | sIL-5  | sIL-6  |
| 14.14  | 671.85  | 6.125   | 0     | 14.49  | 0       | 11     | 16.385 | 6.635  | 0.355  | 0      | 0      | 10.35  |
| 17.285 | 938.65  | 0       | 0     | 36.225 | 9.31    | 0      | 6.45   | 4.805  | 0.21   | 0      | 0      | 3.255  |
| 17.61  | 940.48  | 0       | 0     | 56.015 | 0       | 0      | 6.22   | 0      | 0.34   | 0      | 0      | 0.62   |
| 28.83  | 1960.45 | 29.105  | 0.165 | 42.235 | 3.015   | 0      | 8.59   | 4.325  | 0.615  | 3.815  | 0      | 0.105  |

| gMCP-1  | gMIG     | gMIP-1a | gTNFa | gVEGF  | sGM-CSF | sIFN-g | sIL-1a | sIL-1b | sIL-2 | sIL-4 | sIL-5 | sIL-6  |
|---------|----------|---------|-------|--------|---------|--------|--------|--------|-------|-------|-------|--------|
| 90.685  | 1452.935 | 40.78   | 4.065 | 29.585 | 0       | 12.4   | 23.46  | 28.57  | 0.265 | 0     | 0     | 95.895 |
| 947.82  | 1760.985 | 518.435 | 2.815 | 175.6  | 9.31    | 0      | 106.04 | 32.61  | 0.18  | 0     | 0     | 34.05  |
| 590.67  | 1652.235 | 40.025  | 1.89  | 34.025 | 12.375  | 13.41  | 52.8   | 33.77  | 4.875 | 0     | 0     | 40.12  |
| 301.565 | 971.125  | 24.475  | 1.095 | 35.05  | 0       | 1.04   | 67.27  | 87.34  | 4.855 | 0     | 0     | 47.485 |
| 39.615  | 1764.86  | 22.985  | 0.085 | 21.41  | 0       | 10.39  | 27.49  | 44.74  | 5.56  | 0     | 0     | 1.97   |
| 54.665  | 1153.875 | 19.78   | 2.16  | 39.475 | 12.375  | 18.82  | 30.245 | 45.805 | 6.625 | 3.825 | 0     | 2.89   |

|         |        |   |       |        |       |       |        |       |      |       |   |         |
|---------|--------|---|-------|--------|-------|-------|--------|-------|------|-------|---|---------|
| 387.445 | 713.71 | 0 | 4.235 | 16.495 | 65.94 | 22.83 | 31.585 | 68.88 | 3.72 | 1.645 | 0 | 564.565 |
|---------|--------|---|-------|--------|-------|-------|--------|-------|------|-------|---|---------|

|         |          |          |        |         |        |        |         |         |        |       |       |         |
|---------|----------|----------|--------|---------|--------|--------|---------|---------|--------|-------|-------|---------|
| 491.745 | 342.765  | 0        | 3.805  | 19.545  | 31.425 | 15.09  | 28.585  | 81.785  | 3.86   | 1.42  | 0     | 761.795 |
| 943.355 | 1174     | 64.105   | 1.575  | 18.515  | 43.74  | 0      | 46.515  | 85.795  | 0.225  | 0     | 0     | 369.265 |
| 221.09  | 4250.55  | 31.87    | 0      | 70.26   | 6.81   | 0      | 135.565 | 19.15   | 0.11   | 0     | 0     | 18.125  |
| 443.915 | 1781.115 | 44.29    | 0      | 124.435 | 0      | 0      | 11.56   | 3.825   | 0.07   | 0     | 0     | 0.245   |
| 1237.02 | 2258.13  | 1309.805 | 22.155 | 161.85  | 0      | 0      | 130.46  | 22.85   | 0.08   | 0     | 0     | 83.515  |
| 283.84  | 553.365  | 16.145   | 0.805  | 34.43   | 20.805 | 14.785 | 52.8    | 48.925  | 5.625  | 0     | 0     | 118.51  |
| 46.455  | 62.465   | 22.985   | 3.4    | 18.71   | 20.805 | 19.32  | 43.79   | 99.89   | 9.445  | 0.225 | 0     | 7.185   |
| 339.78  | 911.05   | 19.78    | 3.175  | 13.49   | 12.375 | 15.31  | 47.75   | 61.855  | 7.29   | 0.39  | 3.965 | 42.835  |
| 412.64  | 1583.56  | 37.94    | 0.03   | 14.79   | 12.375 | 2.97   | 79.135  | 140.685 | 10.37  | 0.295 | 4.415 | 54.395  |
| 504.955 | 1290.28  | 33.5     | 1.495  | 39.02   | 0      | 2.97   | 72.995  | 308.97  | 17.515 | 0.36  | 0     | 58.695  |
| 222.75  | 854.01   | 22.985   | 1.535  | 26.15   | 20.805 | 3.185  | 102.53  | 132.845 | 9.63   | 0.735 | 0     | 28.555  |
| 73.865  | 482.09   | 31.115   | 0.68   | 12.54   | 0      | 3.185  | 27.23   | 23.325  | 5.67   | 0     | 0     | 8.085   |
| 66.535  | 1751.62  | 11.785   | 1.775  | 10.06   | 0      | 3.4    | 18.315  | 14.295  | 3.99   | 0.025 | 0     | 5.1     |
| 52.445  | 356.055  | 11.785   | 0.89   | 39.545  | 0      | 0      | 29.565  | 58.18   | 7.245  | 0     | 0     | 3.89    |
| 33.185  | 1042.02  | 0        | 0      | 8.03    | 12.375 | 10.555 | 29.395  | 15.345  | 6.065  | 0.595 | 0.525 | 5.92    |
| 27.41   | 659.735  | 0        | 0      | 33.35   | 20.805 | 3.08   | 25.11   | 316.845 | 14.845 | 1.28  | 0     | 1.835   |

spleen IL-1 spleen IL-1 spleen IL-1 spleen IL-1 spleen IL-1 spleen IP-10 spleen KC spleen MCI spleen MIC spleen MIP spleen TNF spleen VEG

| Spleen | Spleen | Spleen | Spleen | Spleen | Spleen | Spleen | Spleen | Spleen | Spleen | Spleen | Spleen |
|--------|--------|--------|--------|--------|--------|--------|--------|--------|--------|--------|--------|
|--------|--------|--------|--------|--------|--------|--------|--------|--------|--------|--------|--------|

spleen IL-1 spleen IL-1 spleen IL-1 spleen IL-1 spleen IL-1 spleen IP-10 spleen KC spleen MCI spleen MIC spleen MIP spleen TNF spleen VEG

|        |        |        |        |        |          |          |          |          |         |         |        |
|--------|--------|--------|--------|--------|----------|----------|----------|----------|---------|---------|--------|
| 1.425  | 1.565  | 1.51   | 2.85   | 1.32   | 377.51   | 26.785   | 12.66    | 2280.2   | 10.23   | 2.135   | 4.74   |
| 2.2    | 3.055  | 0.945  | 4.165  | 1.31   | 1420.575 | 833.285  | 300.55   | 3018.78  | 199.005 | 19.965  | 12.77  |
| 1.39   | 8.62   | 1.085  | 32.465 | 1.55   | 4875.13  | 2395.82  | 1280.005 | 3929.455 | 917.37  | 4.115   | 3.01   |
| 14.175 | 23.34  | 25.01  | 56.885 | 0      | 5000.0   | 1459.075 | 795.24   | 24877.6  | 496.205 | 15.275  | 3.315  |
| 156.68 | 36.61  | 9.73   | 18.495 | 29.355 | 4575.275 | 2762.195 | 571.545  | 22265.9  | 218.855 | 7.075   | 3.88   |
| 18.17  | 16.68  | 2.445  | 0      | 1.725  | 5000.0   | 2686.715 | 530.415  | 24877.6  | 318.29  | 3.805   | 7.44   |
| 0.73   | 1.37   | 1.85   | 0      | 0.65   | 1407.425 | 725.53   | 72.52    | 8197.025 | 73.925  | 0.355   | 2.52   |
| 1.445  | 1.4    | 0      | 3.31   | 1.285  | 395.56   | 65.125   | 14.73    | 1791.01  | 10.92   | 2.115   | 6.175  |
| 3.09   | 12.33  | 2.01   | 26.93  | 1.605  | 3040.265 | 3436.085 | 1067.68  | 3617.245 | 814.13  | 91.81   | 6.51   |
| 1.95   | 6.65   | 1.795  | 21.815 | 1.66   | 4528.16  | 2494.96  | 1092.405 | 5407.135 | 978.79  | 4.66    | 2.14   |
| 8.79   | 21.545 | 29.015 | 68.53  | 0.815  | 5000.0   | 1290.96  | 762.045  | 24877.6  | 414.145 | 12.045  | 9.225  |
| 112.85 | 12.24  | 8      | 0      | 5.28   | 2110.18  | 1140.825 | 124.62   | 22265.9  | 67.385  | 0       | 3.33   |
| 6.75   | 2.8    | 0      | 0      | 0      | 540.155  | 93.645   | 0        | 4051.805 | 105.725 | 1.055   | 4.94   |
| 5.355  | 1.03   | 0      | 0      | 0.08   | 756.95   | 169.165  | 41.775   | 4632.385 | 50.715  | 0.83    | 1.555  |
| 1.245  | 1.375  | 0.005  | 9.2    | 1.305  | 337.25   | 12.415   | 5.06     | 2933.845 | 23.545  | 2.15    | 3.815  |
| 2.2    | 12.11  | 5.32   | 14.88  | 1.855  | 3018.45  | 4383.43  | 1536.61  | 3878.39  | 1014.41 | 157.085 | 5.8    |
| 1.39   | 10.485 | 1.935  | 35.835 | 1.82   | 3617.02  | 1355.73  | 880.765  | 4711.645 | 860.22  | 6.535   | 3.255  |
| 74.85  | 32.92  | 6.695  | 0      | 11.3   | 4845.895 | 1904.51  | 655.62   | 10838.23 | 488.175 | 10.145  | 4.275  |
| 154.02 | 18.915 | 8.435  | 0      | 16.39  | 3563.52  | 1824.65  | 335.195  | 22265.9  | 181.535 | 5.04    | 7.03   |
| 90.015 | 8.165  | 7.24   | 0      | 0      | 1263.59  | 610.755  | 75.67    | 10970.97 | 72.94   | 0       | 11.6   |
| 5.355  | 2.02   | 0      | 0.245  | 0.11   | 1200.555 | 450.72   | 56.535   | 6448.13  | 55.43   | 0.485   | 6.98   |
| 1.46   | 1.165  | 0.805  | 3.54   | 1.365  | 313.035  | 5.8      | 3.12     | 2571.14  | 8.035   | 2.16    | 2.84   |
| 2.105  | 16.455 | 3.54   | 15.175 | 1.5    | 4781.015 | 4692.03  | 2207.06  | 4043.03  | 1331.82 | 209.83  | 11.575 |
| 17.96  | 55.375 | 25.47  | 61.27  | 0      | 5000.0   | 1549.7   | 1119.86  | 24877.6  | 985.465 | 35.495  | 4.095  |
| 74.85  | 17.165 | 8.65   | 0      | 3.36   | 4418.565 | 1942.02  | 644.58   | 22265.9  | 252.72  | 11.91   | 5.22   |
| 143.33 | 27.755 | 10.16  | 0      | 10.915 | 3019.99  | 2443.11  | 566.775  | 22265.9  | 309.85  | 10.145  | 5.195  |

|               |              |              |          |              |                 |                |                |                |                |             |              |
|---------------|--------------|--------------|----------|--------------|-----------------|----------------|----------------|----------------|----------------|-------------|--------------|
| 21.615        | 0            | 2.7          | 0        | 0            | 387.91          | 261.545        | 54.895         | 5254.115       | 44.82          | 0           | 4.185        |
| 2.83          | 2.275        | 2.055        | 3.255    | 0.345        | 3153.495        | 775.585        | 63.56          | 7477.715       | 73.925         | 0.485       | 3.1          |
| 5.94          | 6.03         | 34.785       | 91.345   | 0            | 453.35          | 62.62          | 0              | 1678.77        | 75.785         | 1.705       | 8.035        |
| 8.585         | 16.025       | 23.135       | 38.93    | 0            | 1363.64         | 1988.85        | 740.64         | 3022.12        | 519.9          | 286.65      | 6.11         |
| 13.34         | 67.205       | 22.175       | 0        | 0            | 5000.0          | 1816.235       | 1059.965       | 24877.6        | 928.035        | 35.37       | 2.35         |
| 41.675        | 1.99         | 8.435        | 0        | 0            | 1316.305        | 190.055        | 92.565         | 6319.825       | 41.36          | 0           | 5.105        |
| 4.09          | 17.13        | 2.26         | 0        | 14.265       | 31520.14        | 2255.255       | 532.59         | 10849.38       | 529.285        | 3.345       | 0.565        |
| 57.205        | 0            | 3.825        | 0        | 6.75         | 1146.46         | 2108.42        | 371.63         | 9361.89        | 185.445        | 0           | 3.555        |
| 0             | 0.3          | 0            | 0        | 0.01         | 374.965         | 54.135         | 33.69          | 1875.975       | 26.98          | 0           | 3.335        |
| 11.26         | 63.32        | 21.19        | 0        | 0            | 5000.0          | 2492.18        | 1083.285       | 2431.75        | 730.64         | 236.75      | 6.83         |
| 15.435        | 43.435       | 4.7          | 0        | 0            | 5000.0          | 1443.495       | 938.18         | 24877.6        | 758.635        | 17.315      | 2.275        |
| 56.84         | 10.105       | 6.26         | 0        | 0            | 4849.91         | 1478.73        | 433.085        | 8414.34        | 245.645        | 3.8         | 4.29         |
| 5.04          | 12.24        | 4.18         | 0        | 12.48        | 5143.78         | 2244.385       | 439.52         | 10996.08       | 345.99         | 2.505       | 1.89         |
| <b>63.375</b> | <b>15.99</b> | <b>8.435</b> | <b>0</b> | <b>0.145</b> | <b>1528.165</b> | <b>1651.82</b> | <b>343.905</b> | <b>22265.9</b> | <b>162.655</b> | <b>2.49</b> | <b>10.38</b> |
| <b>0.115</b>  | <b>0</b>     | <b>2.26</b>  | <b>0</b> | <b>0.025</b> | <b>1431.365</b> | <b>562.985</b> | <b>46.615</b>  | <b>5708.48</b> | <b>70.54</b>   | <b>0</b>    | <b>2.1</b>   |

| Spleen | Spleen       | Spleen       | Spleen | Spleen | Spleen  | Spleen | Spleen | Spleen   | Spleen  | Spleen | Spleen |
|--------|--------------|--------------|--------|--------|---------|--------|--------|----------|---------|--------|--------|
| sIL-10 | sIL-12 (p40) | sIL-12 (p70) | sIL-13 | sIL-17 | sIP-10  | sKC    | sMCP-1 | sMIG     | sMIP-1a | sTNFa  | sVEGF  |
| 1.425  | 1.565        | 1.51         | 2.85   | 1.32   | 377.51  | 26.785 | 12.66  | 2280.2   | 10.23   | 2.135  | 4.74   |
| 1.445  | 1.4          | 0            | 3.31   | 1.285  | 395.56  | 65.125 | 14.73  | 1791.01  | 10.92   | 2.115  | 6.175  |
| 1.245  | 1.375        | 0.005        | 9.2    | 1.305  | 337.25  | 12.415 | 5.06   | 2933.845 | 23.545  | 2.15   | 3.815  |
| 1.46   | 1.165        | 0.805        | 3.54   | 1.365  | 313.035 | 5.8    | 3.12   | 2571.14  | 8.035   | 2.16   | 2.84   |
| 5.94   | 6.03         | 34.785       | 91.345 | 0      | 453.35  | 62.62  | 0      | 1678.77  | 75.785  | 1.705  | 8.035  |

|        |              |              |        |        |          |         |          |          |         |        |       |
|--------|--------------|--------------|--------|--------|----------|---------|----------|----------|---------|--------|-------|
| sIL-10 | sIL-12 (p40) | sIL-12 (p70) | sIL-13 | sIL-17 | sIP-10   | sKC     | sMCP-1   | sMIG     | sMIP-1a | sTNFa  | sVEGF |
| 2.2    | 3.055        | 0.945        | 4.165  | 1.31   | 1420.575 | 833.285 | 300.55   | 3018.78  | 199.005 | 19.965 | 12.77 |
| 1.39   | 8.62         | 1.085        | 32.465 | 1.55   | 4875.13  | 2395.82 | 1280.005 | 3929.455 | 917.37  | 4.115  | 3.01  |



|        |        |        |        |        |          |          |          |          |         |         |        |
|--------|--------|--------|--------|--------|----------|----------|----------|----------|---------|---------|--------|
| 14.175 | 23.34  | 25.01  | 56.885 | 0      | 5000.0   | 1459.075 | 795.24   | 24877.6  | 496.205 | 15.275  | 3.315  |
| 156.68 | 36.61  | 9.73   | 18.495 | 29.355 | 4575.275 | 2762.195 | 571.545  | 22265.9  | 218.855 | 7.075   | 3.88   |
| 18.17  | 16.68  | 2.445  | 0      | 1.725  | 5000.0   | 2686.715 | 530.415  | 24877.6  | 318.29  | 3.805   | 7.44   |
| 0.73   | 1.37   | 1.85   | 0      | 0.65   | 1407.425 | 725.53   | 72.52    | 8197.025 | 73.925  | 0.355   | 2.52   |
| 3.09   | 12.33  | 2.01   | 26.93  | 1.605  | 3040.265 | 3436.085 | 1067.68  | 3617.245 | 814.13  | 91.81   | 6.51   |
| 1.95   | 6.65   | 1.795  | 21.815 | 1.66   | 4528.16  | 2494.96  | 1092.405 | 5407.135 | 978.79  | 4.66    | 2.14   |
| 8.79   | 21.545 | 29.015 | 68.53  | 0.815  | 5000.0   | 1290.96  | 762.045  | 24877.6  | 414.145 | 12.045  | 9.225  |
| 112.85 | 12.24  | 8      | 0      | 5.28   | 2110.18  | 1140.825 | 124.62   | 22265.9  | 67.385  | 0       | 3.33   |
| 6.75   | 2.8    | 0      | 0      | 0      | 540.155  | 93.645   | 0        | 4051.805 | 105.725 | 1.055   | 4.94   |
| 5.355  | 1.03   | 0      | 0      | 0.08   | 756.95   | 169.165  | 41.775   | 4632.385 | 50.715  | 0.83    | 1.555  |
| 2.2    | 12.11  | 5.32   | 14.88  | 1.855  | 3018.45  | 4383.43  | 1536.61  | 3878.39  | 1014.41 | 157.085 | 5.8    |
| 1.39   | 10.485 | 1.935  | 35.835 | 1.82   | 3617.02  | 1355.73  | 880.765  | 4711.645 | 860.22  | 6.535   | 3.255  |
| 74.85  | 32.92  | 6.695  | 0      | 11.3   | 4845.895 | 1904.51  | 655.62   | 10838.23 | 488.175 | 10.145  | 4.275  |
| 154.02 | 18.915 | 8.435  | 0      | 16.39  | 3563.52  | 1824.65  | 335.195  | 22265.9  | 181.535 | 5.04    | 7.03   |
| 90.015 | 8.165  | 7.24   | 0      | 0      | 1263.59  | 610.755  | 75.67    | 10970.97 | 72.94   | 0       | 11.6   |
| 5.355  | 2.02   | 0      | 0.245  | 0.11   | 1200.555 | 450.72   | 56.535   | 6448.13  | 55.43   | 0.485   | 6.98   |
| 2.105  | 16.455 | 3.54   | 15.175 | 1.5    | 4781.015 | 4692.03  | 2207.06  | 4043.03  | 1331.82 | 209.83  | 11.575 |
| 17.96  | 55.375 | 25.47  | 61.27  | 0      | 5000.0   | 1549.7   | 1119.86  | 24877.6  | 985.465 | 35.495  | 4.095  |
| 74.85  | 17.165 | 8.65   | 0      | 3.36   | 4418.565 | 1942.02  | 644.58   | 22265.9  | 252.72  | 11.91   | 5.22   |
| 143.33 | 27.755 | 10.16  | 0      | 10.915 | 3019.99  | 2443.11  | 566.775  | 22265.9  | 309.85  | 10.145  | 5.195  |
| 21.615 | 0      | 2.7    | 0      | 0      | 387.91   | 261.545  | 54.895   | 5254.115 | 44.82   | 0       | 4.185  |
| 2.83   | 2.275  | 2.055  | 3.255  | 0.345  | 3153.495 | 775.585  | 63.56    | 7477.715 | 73.925  | 0.485   | 3.1    |
| 8.585  | 16.025 | 23.135 | 38.93  | 0      | 1363.64  | 1988.85  | 740.64   | 3022.12  | 519.9   | 286.65  | 6.11   |
| 13.34  | 67.205 | 22.175 | 0      | 0      | 5000.0   | 1816.235 | 1059.965 | 24877.6  | 928.035 | 35.37   | 2.35   |
| 41.675 | 1.99   | 8.435  | 0      | 0      | 1316.305 | 190.055  | 92.565   | 6319.825 | 41.36   | 0       | 5.105  |
| 4.09   | 17.13  | 2.26   | 0      | 14.265 | 31520.14 | 2255.255 | 532.59   | 10849.38 | 529.285 | 3.345   | 0.565  |
| 57.205 | 0      | 3.825  | 0      | 6.75   | 1146.46  | 2108.42  | 371.63   | 9361.89  | 185.445 | 0       | 3.555  |
| 0      | 0.3    | 0      | 0      | 0.01   | 374.965  | 54.135   | 33.69    | 1875.975 | 26.98   | 0       | 3.335  |
| 11.26  | 63.32  | 21.19  | 0      | 0      | 5000.0   | 2492.18  | 1083.285 | 2431.75  | 730.64  | 236.75  | 6.83   |

|               |              |              |          |              |                 |                |                |                |                |             |              |
|---------------|--------------|--------------|----------|--------------|-----------------|----------------|----------------|----------------|----------------|-------------|--------------|
| 15.435        | 43.435       | 4.7          | 0        | 0            | 5000.0          | 1443.495       | 938.18         | 24877.6        | 758.635        | 17.315      | 2.275        |
| 56.84         | 10.105       | 6.26         | 0        | 0            | 4849.91         | 1478.73        | 433.085        | 8414.34        | 245.645        | 3.8         | 4.29         |
| 5.04          | 12.24        | 4.18         | 0        | 12.48        | 5143.78         | 2244.385       | 439.52         | 10996.08       | 345.99         | 2.505       | 1.89         |
| <b>63.375</b> | <b>15.99</b> | <b>8.435</b> | <b>0</b> | <b>0.145</b> | <b>1528.165</b> | <b>1651.82</b> | <b>343.905</b> | <b>22265.9</b> | <b>162.655</b> | <b>2.49</b> | <b>10.38</b> |
| <b>0.115</b>  | <b>0</b>     | <b>2.26</b>  | <b>0</b> | <b>0.025</b> | <b>1431.365</b> | <b>562.985</b> | <b>46.615</b>  | <b>5708.48</b> | <b>70.54</b>   | <b>0</b>    | <b>2.1</b>   |

spleen IL-1 spleen IL-1 spleen IL-1 spleen IL-1 spleen IL-1 spleen IP-10 spleen KC spleen MCI spleen MIC spleen MIP spleen TNF spleen VEG  
Spleen Spleen

spleen IL-1 spleen IL-1 spleen IL-1 spleen IL-1 spleen IL-1 spleen IP-10 spleen KC spleen MCI spleen MIC spleen MIP spleen TNF spleen VEG

|       |        |   |       |       |          |          |         |          |        |       |        |
|-------|--------|---|-------|-------|----------|----------|---------|----------|--------|-------|--------|
| 0.5   | 3.71   | 0 | 0     | 0.11  | 961.055  | 87.455   | 17.565  | 6764.43  | 27.575 | 0     | 0.17   |
| 0.88  | 10.31  | 0 | 0     | 0.245 | 1905.695 | 1455.01  | 354.42  | 5419.895 | 43.84  | 65.17 | 0.345  |
| 2.38  | 15.655 | 0 | 0     | 0     | 3658.835 | 2581.685 | 415.505 | 2440.9   | 130.45 | 0.08  | 12.3   |
| 2.19  | 1.315  | 0 | 0     | 0     | 841.89   | 614.3    | 120.61  | 1958.38  | 50.34  | 1.38  | 5.665  |
| 0.115 | 2.385  | 0 | 12.83 | 0.365 | 428.765  | 498.385  | 182.885 | 3705.255 | 87.185 | 0.55  | 67.055 |
| 0     | 2.955  | 0 | 0.495 | 0     | 238.36   | 39.99    | 28.455  | 780.755  | 25.9   | 2.12  | 6.935  |
| 3.02  | 1.415  | 0 | 4.54  | 0     | 546.135  | 54.64    | 46.455  | 3008.8   | 32.325 | 1.495 | 6.375  |

|       |       |   |   |   |         |        |        |          |        |       |        |
|-------|-------|---|---|---|---------|--------|--------|----------|--------|-------|--------|
| 3.71  | 1.515 | 0 | 0 | 0 | 728.67  | 178.73 | 27.24  | 7531.65  | 16.335 | 0.01  | 13.745 |
| 1.265 | 0     | 0 | 0 | 0 | 689.71  | 51.77  | 12.425 | 3470.215 | 4.945  | 0     | 13.85  |
| 3.61  | 3.355 | 0 | 0 | 0 | 614.495 | 57.435 | 23.365 | 7531.65  | 22.655 | 0.345 | 4.44   |

|       |        |   |   |   |         |         |          |          |         |        |       |
|-------|--------|---|---|---|---------|---------|----------|----------|---------|--------|-------|
| 11.26 | 25.155 | 0 | 0 | 0 | 921.145 | 1884.65 | 1018.605 | 3413.17  | 136.08  | 82.295 | 3.18  |
| 3.15  | 32.53  | 0 | 0 | 0 | 974.85  | 1846.63 | 1162.335 | 4031.015 | 172.075 | 54.43  | 2.66  |
| 2.93  | 25.925 | 0 | 0 | 0 | 716.365 | 4272.47 | 2394.12  | 1892.26  | 184.175 | 19.12  | 6.915 |

|       |        |   |   |       |          |          |         |          |       |       |       |
|-------|--------|---|---|-------|----------|----------|---------|----------|-------|-------|-------|
| 3.37  | 15.335 | 0 | 0 | 0     | 2272.405 | 756.465  | 266.215 | 2810.245 | 97.43 | 0.24  | 7.725 |
| 1.595 | 0.545  | 0 | 0 | 0     | 461.945  | 94.79    | 54.485  | 1936.675 | 8.03  | 0.005 | 8.405 |
| 1.38  | 7.57   | 0 | 0 | 2.715 | 1398.13  | 2151.245 | 349.95  | 2816.5   | 99.69 | 0.185 | 7.795 |

|       |      |   |        |   |         |         |       |          |       |       |       |
|-------|------|---|--------|---|---------|---------|-------|----------|-------|-------|-------|
| 3.84  | 9.9  | 0 | 0      | 0 | 2791.39 | 752.255 | 184.6 | 3194.575 | 57.76 | 3.62  | 6.36  |
| 10.87 | 5.47 | 0 | 38.365 | 0 | 265.075 | 21.32   | 29.46 | 1518.67  | 33.5  | 1.135 | 12.39 |

|      |       |      |      |   |         |         |         |          |       |      |       |
|------|-------|------|------|---|---------|---------|---------|----------|-------|------|-------|
| 4.65 | 8.825 | 3.41 | 6.79 | 0 | 1130.45 | 723.065 | 140.835 | 4306.205 | 54.55 | 1.93 | 7.705 |
|------|-------|------|------|---|---------|---------|---------|----------|-------|------|-------|

|      |       |   |         |       |         |         |         |         |         |      |         |
|------|-------|---|---------|-------|---------|---------|---------|---------|---------|------|---------|
| 0.74 | 7.925 | 0 | 40.58   | 1.025 | 714.015 | 600.27  | 189.855 | 5000    | 102.595 | 3.03 | 62.95   |
| 0.94 | 6.84  | 0 | 121.385 | 5.365 | 880.53  | 693.76  | 241.735 | 4444.09 | 131.055 | 1.46 | 118.785 |
| 0.74 | 7.02  | 0 | 38.05   | 1.025 | 564.5   | 427.495 | 157.425 | 3664.58 | 94.01   | 1.93 | 69.97   |

|      |       |   |       |   |         |        |        |          |        |       |       |
|------|-------|---|-------|---|---------|--------|--------|----------|--------|-------|-------|
| 0.33 | 1.805 | 0 | 0     | 0 | 403.69  | 56.885 | 68.765 | 755.16   | 35.77  | 1.34  | 8.595 |
| 0.33 | 0.305 | 0 | 0     | 0 | 460.24  | 111.4  | 43.845 | 1286.365 | 31.115 | 2.005 | 8.18  |
| 0.33 | 0     | 0 | 1.465 | 0 | 594.015 | 68.71  | 42.48  | 1254.28  | 38.99  | 2.085 | 11.34 |

|       |       |       |        |     |         |        |        |          |        |      |        |
|-------|-------|-------|--------|-----|---------|--------|--------|----------|--------|------|--------|
| 1.335 | 5.745 | 1.705 | 0      | 0   | 443.55  | 61.89  | 48.935 | 2422.495 | 43.975 | 4.56 | 3.7    |
| 4.29  | 3.895 | 0     | 115.67 | 0.7 | 437.145 | 49.265 | 38.87  | 2102.115 | 28.595 | 2.58 | 53.475 |

| Spleen | Spleen       | Spleen       | Spleen | Spleen | Spleen  | Spleen | Spleen | Spleen   | Spleen  | Spleen | Spleen |
|--------|--------------|--------------|--------|--------|---------|--------|--------|----------|---------|--------|--------|
| sIL-10 | sIL-12 (p40) | sIL-12 (p70) | sIL-13 | sIL-17 | sIP-10  | sKC    | sMCP-1 | sMIG     | sMIP-1a | sTNFa  | sVEGF  |
| 0.5    | 3.71         | 0            | 0      | 0.11   | 961.055 | 87.455 | 17.565 | 6764.43  | 27.575  | 0      | 0.17   |
| 3.71   | 1.515        | 0            | 0      | 0      | 728.67  | 178.73 | 27.24  | 7531.65  | 16.335  | 0.01   | 13.745 |
| 1.265  | 0            | 0            | 0      | 0      | 689.71  | 51.77  | 12.425 | 3470.215 | 4.945   | 0      | 13.85  |
| 3.61   | 3.355        | 0            | 0      | 0      | 614.495 | 57.435 | 23.365 | 7531.65  | 22.655  | 0.345  | 4.44   |

| sIL-10 | sIL-12 (p40) | sIL-12 (p70) | sIL-13 | sIL-17 | sIP-10   | sKC      | sMCP-1  | sMIG     | sMIP-1a | sTNFa | sVEGF  |
|--------|--------------|--------------|--------|--------|----------|----------|---------|----------|---------|-------|--------|
| 0.88   | 10.31        | 0            | 0      | 0.245  | 1905.695 | 1455.01  | 354.42  | 5419.895 | 43.84   | 65.17 | 0.345  |
| 2.38   | 15.655       | 0            | 0      | 0      | 3658.835 | 2581.685 | 415.505 | 2440.9   | 130.45  | 0.08  | 12.3   |
| 2.19   | 1.315        | 0            | 0      | 0      | 841.89   | 614.3    | 120.61  | 1958.38  | 50.34   | 1.38  | 5.665  |
| 0.115  | 2.385        | 0            | 12.83  | 0.365  | 428.765  | 498.385  | 182.885 | 3705.255 | 87.185  | 0.55  | 67.055 |
| 0      | 2.955        | 0            | 0.495  | 0      | 238.36   | 39.99    | 28.455  | 780.755  | 25.9    | 2.12  | 6.935  |
| 3.02   | 1.415        | 0            | 4.54   | 0      | 546.135  | 54.64    | 46.455  | 3008.8   | 32.325  | 1.495 | 6.375  |

|       |        |   |   |   |         |         |          |         |        |        |      |
|-------|--------|---|---|---|---------|---------|----------|---------|--------|--------|------|
| 11.26 | 25.155 | 0 | 0 | 0 | 921.145 | 1884.65 | 1018.605 | 3413.17 | 136.08 | 82.295 | 3.18 |
|-------|--------|---|---|---|---------|---------|----------|---------|--------|--------|------|

|       |        |       |         |       |          |          |          |          |         |       |         |
|-------|--------|-------|---------|-------|----------|----------|----------|----------|---------|-------|---------|
| 3.15  | 32.53  | 0     | 0       | 0     | 974.85   | 1846.63  | 1162.335 | 4031.015 | 172.075 | 54.43 | 2.66    |
| 2.93  | 25.925 | 0     | 0       | 0     | 716.365  | 4272.47  | 2394.12  | 1892.26  | 184.175 | 19.12 | 6.915   |
| 3.37  | 15.335 | 0     | 0       | 0     | 2272.405 | 756.465  | 266.215  | 2810.245 | 97.43   | 0.24  | 7.725   |
| 1.595 | 0.545  | 0     | 0       | 0     | 461.945  | 94.79    | 54.485   | 1936.675 | 8.03    | 0.005 | 8.405   |
| 1.38  | 7.57   | 0     | 0       | 2.715 | 1398.13  | 2151.245 | 349.95   | 2816.5   | 99.69   | 0.185 | 7.795   |
| 3.84  | 9.9    | 0     | 0       | 0     | 2791.39  | 752.255  | 184.6    | 3194.575 | 57.76   | 3.62  | 6.36    |
| 10.87 | 5.47   | 0     | 38.365  | 0     | 265.075  | 21.32    | 29.46    | 1518.67  | 33.5    | 1.135 | 12.39   |
| 4.65  | 8.825  | 3.41  | 6.79    | 0     | 1130.45  | 723.065  | 140.835  | 4306.205 | 54.55   | 1.93  | 7.705   |
| 0.74  | 7.925  | 0     | 40.58   | 1.025 | 714.015  | 600.27   | 189.855  | 5000     | 102.595 | 3.03  | 62.95   |
| 0.94  | 6.84   | 0     | 121.385 | 5.365 | 880.53   | 693.76   | 241.735  | 4444.09  | 131.055 | 1.46  | 118.785 |
| 0.74  | 7.02   | 0     | 38.05   | 1.025 | 564.5    | 427.495  | 157.425  | 3664.58  | 94.01   | 1.93  | 69.97   |
| 0.33  | 1.805  | 0     | 0       | 0     | 403.69   | 56.885   | 68.765   | 755.16   | 35.77   | 1.34  | 8.595   |
| 0.33  | 0.305  | 0     | 0       | 0     | 460.24   | 111.4    | 43.845   | 1286.365 | 31.115  | 2.005 | 8.18    |
| 0.33  | 0      | 0     | 1.465   | 0     | 594.015  | 68.71    | 42.48    | 1254.28  | 38.99   | 2.085 | 11.34   |
| 1.335 | 5.745  | 1.705 | 0       | 0     | 443.55   | 61.89    | 48.935   | 2422.495 | 43.975  | 4.56  | 3.7     |
| 4.29  | 3.895  | 0     | 115.67  | 0.7   | 437.145  | 49.265   | 38.87    | 2102.115 | 28.595  | 2.58  | 53.475  |

kidney GM-C kidney IFN kidney IL-1 kidney IL-1 kidney IL-2 kidney IL-4 kidney IL-5 kidney IL-6 kidney IL-1 kidney IL-1 kidney IL-1 kidney IL-1 kidney IL-1

| Kidney | Kidney | Kidney | Kidney | Kidney | Kidney | Kidney | Kidney | Kidney | Kidney | Kidney | Kidney | Kidney |
|--------|--------|--------|--------|--------|--------|--------|--------|--------|--------|--------|--------|--------|
|--------|--------|--------|--------|--------|--------|--------|--------|--------|--------|--------|--------|--------|

kidney GM-C kidney IFN kidney IL-1 kidney IL-1 kidney IL-2 kidney IL-4 kidney IL-5 kidney IL-6 kidney IL-1 kidney IL-1 kidney IL-1 kidney IL-1 kidney IL-1

|        |         |          |         |        |       |       |          |         |        |        |         |       |
|--------|---------|----------|---------|--------|-------|-------|----------|---------|--------|--------|---------|-------|
| 5.595  | 5785.58 | 419.14   | 62.65   | 79.27  | 1.65  | 1.22  | 7.295    | 4.925   | 9.68   | 2.225  | 68.185  | 1.58  |
| 2.255  | 108.315 | 230.855  | 40.15   | 12.94  | 1.675 | 1.255 | 135.905  | 15.155  | 10.615 | 0.26   | 36.055  | 1.49  |
| 9.42   | 169.89  | 1000.025 | 143.485 | 15.935 | 1.705 | 1.385 | 1332.355 | 10.315  | 18.835 | 3.465  | 35.79   | 1.855 |
| 64.57  | 184.245 | 748.735  | 323.74  | 50.535 | 1.46  | 3.665 | 1182.775 | 97.92   | 157.21 | 41.62  | 760.695 | 3.37  |
| 35.265 | 136.02  | 223.725  | 55.4191 | 42.475 | 0     | 5.93  | 635.565  | 101.835 | 57.125 | 7.675  | 74.46   | 5.12  |
| 0      | 28.45   | 250.41   | 52.555  | 9.615  | 1.03  | 0.125 | 296.245  | 16.275  | 16.245 | 0      | 0       | 0     |
| 0      | 17.58   | 37.905   | 9.805   | 0.93   | 0     | 0     | 1.08     | 1.115   | 1.92   | 0      | 0       | 0.19  |
| 4.645  | 195.42  | 609.585  | 80.43   | 108.9  | 1.62  | 1.235 | 6.555    | 7.25    | 11.78  | 0.53   | 1020.32 | 1.645 |
| 7.265  | 82.57   | 219.935  | 20.105  | 11.825 | 1.68  | 1.32  | 474.275  | 10.72   | 6.43   | 1.085  | 21.125  | 1.425 |
| 9.42   | 115.655 | 227.545  | 109.79  | 22.095 | 1.66  | 1.33  | 685.485  | 17.13   | 19.99  | 30.06  | 198.485 | 1.82  |
| 55.35  | 163.01  | 482.785  | 149.54  | 34.465 | 1.28  | 1.65  | 945.25   | 51.335  | 88.775 | 10.325 | 494.45  | 2.38  |
| 51.145 | 133.465 | 260.375  | 47.5922 | 58.91  | 0     | 8.09  | 511.485  | 126.14  | 69.91  | 7.675  | 100.16  | 9.005 |
| 58.65  | 98.485  | 535.12   | 124.585 | 22.195 | 1.205 | 1.065 | 5.875    | 39.48   | 55.62  | 4.7    | 197.315 | 0     |
| 0      | 103.13  | 270.275  | 81.61   | 15.385 | 0     | 0     | 1.99     | 17.75   | 26.13  | 3.05   | 21.625  | 1.295 |
| 7.265  | 147.99  | 268.7    | 71.515  | 17.38  | 1.725 | 1.295 | 49.62    | 17.3    | 12.44  | 4.95   | 128.36  | 1.905 |
| 9.42   | 102.49  | 251.855  | 86.625  | 15.44  | 1.74  | 1.435 | 509.68   | 19.315  | 10.65  | 2.08   | 56.12   | 1.66  |
| 7.265  | 124.56  | 724.66   | 56.275  | 24.38  | 1.645 | 1.33  | 1343.15  | 4.815   | 17.735 | 1.51   | 64.59   | 1.535 |
| 22.615 | 28.745  | 148.62   | 54.0496 | 20.455 | 0     | 0     | 543.87   | 34.095  | 24.46  | 6.48   | 0       | 1     |
| 39.405 | 99.025  | 236.04   | 33.7976 | 49.835 | 0     | 6.25  | 806.9    | 127.16  | 72.485 | 9.085  | 93.445  | 5.44  |
| 33.47  | 13.785  | 63.22    | 16.5502 | 1.94   | 0     | 0     | 22.51    | 22.41   | 17.05  | 7.24   | 0       | 0     |
| 0      | 45.725  | 222.775  | 18.745  | 6.56   | 0     | 0     | 3.24     | 3.935   | 5.14   | 0      | 0       | 0.245 |
| 6.46   | 23.6    | 249.08   | 47.81   | 6.615  | 1.68  | 1.275 | 9.895    | 4.725   | 10.795 | 6.98   | 66.315  | 1.935 |
| 5.595  | 28.08   | 305.365  | 11.54   | 11.065 | 1.65  | 1.22  | 378.435  | 4.065   | 3.325  | 0.395  | 6.255   | 1.375 |
| 74.575 | 226.78  | 624.49   | 183.485 | 49.865 | 1.36  | 2.775 | 1178.375 | 66.2    | 119.28 | 19.675 | 684.61  | 3.72  |
| 0      | 9.67    | 88.135   | 186.086 | 10.765 | 0     | 0     | 722.975  | 20.01   | 9.335  | 4.27   | 0       | 0     |
| 48.625 | 204.545 | 261.015  | 72.8906 | 46.115 | 0     | 7.825 | 429.04   | 114.22  | 83.71  | 10.375 | 97.93   | 7.38  |

|             |                |                |               |               |          |          |               |               |              |              |               |             |
|-------------|----------------|----------------|---------------|---------------|----------|----------|---------------|---------------|--------------|--------------|---------------|-------------|
| 0           | 14.125         | 24.23          | 16.0107       | 0             | 0        | 0        | 6.99          | 5.71          | 1.31         | 4.495        | 0             | 0           |
| 11.65       | 33.13          | 241.895        | 36.015        | 10.505        | 0        | 0        | 13.26         | 9.01          | 12.18        | 0.975        | 2.92          | 0.675       |
| 57.03       | 225.44         | 638.19         | 198.795       | 43.685        | 1.38     | 2.36     | 21.68         | 57.75         | 98.535       | 15.905       | 494.175       | 3.285       |
| 55.35       | 233.83         | 617.255        | 226.19        | 47.045        | 1.42     | 2.915    | 188.945       | 68.655        | 112.895      | 21.685       | 551.39        | 3.95        |
| 79.985      | 225.075        | 610.175        | 248.88        | 54.565        | 1.54     | 2.775    | 1998.81       | 83.01         | 156.385      | 141.395      | 694.945       | 4.35        |
| 16.52       | 42.205         | 190.51         | 157.7249      | 20.97         | 0        | 0        | 25.825        | 30.25         | 14.555       | 6.04         | 0             | 0           |
| 21.115      | 177.305        | 255.415        | 166.685       | 28.39         | 0        | 0        | 807.645       | 31.095        | 72.04        | 11.865       | 147.935       | 2.535       |
| 6.4         | 8.025          | 14.145         | 5.8017        | 0             | 0        | 0        | 302.76        | 3.875         | 2.155        | 6.26         | 0             | 0           |
| 0           | 18.565         | 230.375        | 41.32         | 7.085         | 0        | 0        | 0             | 4.72          | 7.075        | 0            | 0.245         | 0.475       |
| 73.43       | 242.345        | 630.92         | 174.265       | 51.335        | 1.36     | 2.5      | 339.79        | 64.64         | 90.72        | 65.705       | 645.78        | 3.2         |
| 77.885      | 186.3          | 565.41         | 177.34        | 41.295        | 1.42     | 1.65     | 1724.745      | 57.525        | 103.385      | 33.59        | 664.045       | 1.635       |
| 31.585      | 19.325         | 120.56         | 18.675        | 13.985        | 0        | 0        | 1255.45       | 27.92         | 22.785       | 6.695        | 0             | 0           |
| 20.455      | 178.21         | 252.33         | 180.35        | 30.965        | 0        | 0        | 974.455       | 36.78         | 51.89        | 8.335        | 133.175       | 3.19        |
| <b>0</b>    | <b>25.25</b>   | <b>36.635</b>  | <b>10.58</b>  | <b>2.165</b>  | <b>0</b> | <b>0</b> | <b>164.15</b> | <b>7.49</b>   | <b>4.155</b> | <b>5.16</b>  | <b>0</b>      | <b>0</b>    |
| <b>9.46</b> | <b>123.825</b> | <b>192.645</b> | <b>97.555</b> | <b>17.985</b> | <b>0</b> | <b>0</b> | <b>6.365</b>  | <b>20.895</b> | <b>30.55</b> | <b>7.335</b> | <b>126.07</b> | <b>1.62</b> |

| Kidney  | Kidney  | Kidney  | Kidney  | Kidney | Kidney | Kidney | Kidney | Kidney | Kidney       | Kidney       | Kidney  | Kidney |
|---------|---------|---------|---------|--------|--------|--------|--------|--------|--------------|--------------|---------|--------|
| kGM-CSF | kIFN-g  | kIL-1a  | kIL-1b  | kIL-2  | kIL-4  | kIL-5  | kIL-6  | kIL-10 | kIL-12 (p40) | kIL-12 (p70) | kIL-13  | kIL-17 |
| 5.595   | 5785.58 | 419.14  | 62.65   | 79.27  | 1.65   | 1.22   | 7.295  | 4.925  | 9.68         | 2.225        | 68.185  | 1.58   |
| 4.645   | 195.42  | 609.585 | 80.43   | 108.9  | 1.62   | 1.235  | 6.555  | 7.25   | 11.78        | 0.53         | 1020.32 | 1.645  |
| 7.265   | 147.99  | 268.7   | 71.515  | 17.38  | 1.725  | 1.295  | 49.62  | 17.3   | 12.44        | 4.95         | 128.36  | 1.905  |
| 6.46    | 23.6    | 249.08  | 47.81   | 6.615  | 1.68   | 1.275  | 9.895  | 4.725  | 10.795       | 6.98         | 66.315  | 1.935  |
| 57.03   | 225.44  | 638.19  | 198.795 | 43.685 | 1.38   | 2.36   | 21.68  | 57.75  | 98.535       | 15.905       | 494.175 | 3.285  |

| kGM-CSF | kIFN-g  | kIL-1a   | kIL-1b  | kIL-2  | kIL-4 | kIL-5 | kIL-6    | kIL-10 | kIL-12 (p40) | kIL-12 (p70) | kIL-13 | kIL-17 |
|---------|---------|----------|---------|--------|-------|-------|----------|--------|--------------|--------------|--------|--------|
| 2.255   | 108.315 | 230.855  | 40.15   | 12.94  | 1.675 | 1.255 | 135.905  | 15.155 | 10.615       | 0.26         | 36.055 | 1.49   |
| 9.42    | 169.89  | 1000.025 | 143.485 | 15.935 | 1.705 | 1.385 | 1332.355 | 10.315 | 18.835       | 3.465        | 35.79  | 1.855  |

|        |         |         |          |        |       |       |          |         |         |         |         |       |
|--------|---------|---------|----------|--------|-------|-------|----------|---------|---------|---------|---------|-------|
| 64.57  | 184.245 | 748.735 | 323.74   | 50.535 | 1.46  | 3.665 | 1182.775 | 97.92   | 157.21  | 41.62   | 760.695 | 3.37  |
| 35.265 | 136.02  | 223.725 | 55.4191  | 42.475 | 0     | 5.93  | 635.565  | 101.835 | 57.125  | 7.675   | 74.46   | 5.12  |
| 0      | 28.45   | 250.41  | 52.555   | 9.615  | 1.03  | 0.125 | 296.245  | 16.275  | 16.245  | 0       | 0       | 0     |
| 0      | 17.58   | 37.905  | 9.805    | 0.93   | 0     | 0     | 1.08     | 1.115   | 1.92    | 0       | 0       | 0.19  |
| 7.265  | 82.57   | 219.935 | 20.105   | 11.825 | 1.68  | 1.32  | 474.275  | 10.72   | 6.43    | 1.085   | 21.125  | 1.425 |
| 9.42   | 115.655 | 227.545 | 109.79   | 22.095 | 1.66  | 1.33  | 685.485  | 17.13   | 19.99   | 30.06   | 198.485 | 1.82  |
| 55.35  | 163.01  | 482.785 | 149.54   | 34.465 | 1.28  | 1.65  | 945.25   | 51.335  | 88.775  | 10.325  | 494.45  | 2.38  |
| 51.145 | 133.465 | 260.375 | 47.5922  | 58.91  | 0     | 8.09  | 511.485  | 126.14  | 69.91   | 7.675   | 100.16  | 9.005 |
| 58.65  | 98.485  | 535.12  | 124.585  | 22.195 | 1.205 | 1.065 | 5.875    | 39.48   | 55.62   | 4.7     | 197.315 | 0     |
| 0      | 103.13  | 270.275 | 81.61    | 15.385 | 0     | 0     | 1.99     | 17.75   | 26.13   | 3.05    | 21.625  | 1.295 |
| 9.42   | 102.49  | 251.855 | 86.625   | 15.44  | 1.74  | 1.435 | 509.68   | 19.315  | 10.65   | 2.08    | 56.12   | 1.66  |
| 7.265  | 124.56  | 724.66  | 56.275   | 24.38  | 1.645 | 1.33  | 1343.15  | 4.815   | 17.735  | 1.51    | 64.59   | 1.535 |
| 22.615 | 28.745  | 148.62  | 54.0496  | 20.455 | 0     | 0     | 543.87   | 34.095  | 24.46   | 6.48    | 0       | 1     |
| 39.405 | 99.025  | 236.04  | 33.7976  | 49.835 | 0     | 6.25  | 806.9    | 127.16  | 72.485  | 9.085   | 93.445  | 5.44  |
| 33.47  | 13.785  | 63.22   | 16.5502  | 1.94   | 0     | 0     | 22.51    | 22.41   | 17.05   | 7.24    | 0       | 0     |
| 0      | 45.725  | 222.775 | 18.745   | 6.56   | 0     | 0     | 3.24     | 3.935   | 5.14    | 0       | 0       | 0.245 |
| 5.595  | 28.08   | 305.365 | 11.54    | 11.065 | 1.65  | 1.22  | 378.435  | 4.065   | 3.325   | 0.395   | 6.255   | 1.375 |
| 74.575 | 226.78  | 624.49  | 183.485  | 49.865 | 1.36  | 2.775 | 1178.375 | 66.2    | 119.28  | 19.675  | 684.61  | 3.72  |
| 0      | 9.67    | 88.135  | 186.086  | 10.765 | 0     | 0     | 722.975  | 20.01   | 9.335   | 4.27    | 0       | 0     |
| 48.625 | 204.545 | 261.015 | 72.8906  | 46.115 | 0     | 7.825 | 429.04   | 114.22  | 83.71   | 10.375  | 97.93   | 7.38  |
| 0      | 14.125  | 24.23   | 16.0107  | 0      | 0     | 0     | 6.99     | 5.71    | 1.31    | 4.495   | 0       | 0     |
| 11.65  | 33.13   | 241.895 | 36.015   | 10.505 | 0     | 0     | 13.26    | 9.01    | 12.18   | 0.975   | 2.92    | 0.675 |
| 55.35  | 233.83  | 617.255 | 226.19   | 47.045 | 1.42  | 2.915 | 188.945  | 68.655  | 112.895 | 21.685  | 551.39  | 3.95  |
| 79.985 | 225.075 | 610.175 | 248.88   | 54.565 | 1.54  | 2.775 | 1998.81  | 83.01   | 156.385 | 141.395 | 694.945 | 4.35  |
| 16.52  | 42.205  | 190.51  | 157.7249 | 20.97  | 0     | 0     | 25.825   | 30.25   | 14.555  | 6.04    | 0       | 0     |
| 21.115 | 177.305 | 255.415 | 166.685  | 28.39  | 0     | 0     | 807.645  | 31.095  | 72.04   | 11.865  | 147.935 | 2.535 |
| 6.4    | 8.025   | 14.145  | 5.8017   | 0      | 0     | 0     | 302.76   | 3.875   | 2.155   | 6.26    | 0       | 0     |
| 0      | 18.565  | 230.375 | 41.32    | 7.085  | 0     | 0     | 0        | 4.72    | 7.075   | 0       | 0.245   | 0.475 |
| 73.43  | 242.345 | 630.92  | 174.265  | 51.335 | 1.36  | 2.5   | 339.79   | 64.64   | 90.72   | 65.705  | 645.78  | 3.2   |

|             |                |                |               |               |          |          |               |               |              |              |               |             |
|-------------|----------------|----------------|---------------|---------------|----------|----------|---------------|---------------|--------------|--------------|---------------|-------------|
| 77.885      | 186.3          | 565.41         | 177.34        | 41.295        | 1.42     | 1.65     | 1724.745      | 57.525        | 103.385      | 33.59        | 664.045       | 1.635       |
| 31.585      | 19.325         | 120.56         | 18.675        | 13.985        | 0        | 0        | 1255.45       | 27.92         | 22.785       | 6.695        | 0             | 0           |
| 20.455      | 178.21         | 252.33         | 180.35        | 30.965        | 0        | 0        | 974.455       | 36.78         | 51.89        | 8.335        | 133.175       | 3.19        |
| <b>0</b>    | <b>25.25</b>   | <b>36.635</b>  | <b>10.58</b>  | <b>2.165</b>  | <b>0</b> | <b>0</b> | <b>164.15</b> | <b>7.49</b>   | <b>4.155</b> | <b>5.16</b>  | <b>0</b>      | <b>0</b>    |
| <b>9.46</b> | <b>123.825</b> | <b>192.645</b> | <b>97.555</b> | <b>17.985</b> | <b>0</b> | <b>0</b> | <b>6.365</b>  | <b>20.895</b> | <b>30.55</b> | <b>7.335</b> | <b>126.07</b> | <b>1.62</b> |

kidney GM-C kidney IFN kidney IL-1 kidney IL-1 kidney IL-2 kidney IL-4 kidney IL-5 kidney IL-6 kidney IL-1 kidney IL-1 kidney IL-1 kidney IL-1 kidney IL-1  
Kidney Kidney

kidney GM-C kidney IFN kidney IL-1 kidney IL-1 kidney IL-2 kidney IL-4 kidney IL-5 kidney IL-6 kidney IL-1 kidney IL-1 kidney IL-1 kidney IL-1 kidney IL-1

|        |         |         |         |        |   |       |        |        |         |       |         |       |
|--------|---------|---------|---------|--------|---|-------|--------|--------|---------|-------|---------|-------|
| 23.605 | 222.935 | 508.36  | 153.175 | 36.065 | 0 | 0     | 8.075  | 38.325 | 61.99   | 4.36  | 251.81  | 2.38  |
| 41.51  | 247.155 | 437.865 | 244.69  | 57.78  | 0 | 2     | 38.94  | 69.805 | 118.945 | 25.04 | 300.285 | 5.255 |
| 0      | 0       | 8.415   | 2.205   | 0      | 0 | 0     | 10.405 | 1.81   | 0       | 0     | 0       | 0     |
| 17.21  | 30.66   | 106.975 | 37.135  | 20.15  | 0 | 0     | 54.855 | 8.49   | 9.005   | 0     | 0       | 0     |
| 26.36  | 3.82    | 54.48   | 19.6    | 3.635  | 0 | 0     | 18.735 | 3.57   | 4.455   | 0     | 0       | 0     |
| 42.32  | 32.375  | 98.54   | 69.755  | 13.825 | 0 | 0.525 | 4.015  | 18.49  | 25.79   | 0.48  | 0       | 0     |
| 46.26  | 245.235 | 412.8   | 171.225 | 43.615 | 0 | 4.415 | 10.88  | 155.07 | 48.97   | 0     | 68.715  | 3.015 |

|   |   |        |       |   |   |   |      |      |   |   |   |   |
|---|---|--------|-------|---|---|---|------|------|---|---|---|---|
| 0 | 0 | 3.465  | 0     | 0 | 0 | 0 | 0.22 | 1.81 | 0 | 0 | 0 | 0 |
| 0 | 0 | 15.425 | 0.91  | 0 | 0 | 0 | 0    | 2.43 | 0 | 0 | 0 | 0 |
| 0 | 0 | 19.37  | 2.205 | 0 | 0 | 0 | 0    | 2.43 | 0 | 0 | 0 | 0 |

|       |         |          |         |         |      |       |         |        |         |       |         |       |
|-------|---------|----------|---------|---------|------|-------|---------|--------|---------|-------|---------|-------|
| 58.65 | 657.325 | 1916.155 | 449.645 | 106.105 | 1.29 | 1.935 | 56.805  | 90     | 130.815 | 0     | 680.47  | 2.555 |
| 43.26 | 265.985 | 610.445  | 251.895 | 36.84   | 1.22 | 1.36  | 109.085 | 52.215 | 80.535  | 2.445 | 491.725 | 1.185 |
| 3.015 | 0       | 28.445   | 7.9     | 0.165   | 0    | 0     | 24.92   | 5.515  | 0       | 0     | 0       | 0     |

|       |   |        |       |   |   |   |        |       |   |   |   |   |
|-------|---|--------|-------|---|---|---|--------|-------|---|---|---|---|
| 0     | 0 | 13.08  | 4.805 | 0 | 0 | 0 | 3.9    | 2.33  | 0 | 0 | 0 | 0 |
| 5.215 | 0 | 17.425 | 4.325 | 0 | 0 | 0 | 0      | 3.37  | 0 | 0 | 0 | 0 |
| 0     | 0 | 4.495  | 0     | 0 | 0 | 0 | 26.695 | 1.595 | 0 | 0 | 0 | 0 |

|        |        |         |       |       |   |       |       |        |       |   |      |   |
|--------|--------|---------|-------|-------|---|-------|-------|--------|-------|---|------|---|
| 34.555 | 33.445 | 136.225 | 37.43 | 21.09 | 0 | 0.525 | 33.07 | 20.115 | 17.46 | 0 | 0.07 | 0 |
| 30.785 | 49.535 | 131.725 | 32.82 | 22.98 | 0 | 0     | 1.21  | 12.72  | 4.455 | 0 | 0    | 0 |



|       |       |         |        |        |   |       |        |       |       |   |   |   |
|-------|-------|---------|--------|--------|---|-------|--------|-------|-------|---|---|---|
| 26.36 | 83.59 | 162.875 | 35.015 | 26.365 | 0 | 0.525 | 31.685 | 10.87 | 9.185 | 0 | 0 | 0 |
|-------|-------|---------|--------|--------|---|-------|--------|-------|-------|---|---|---|

|        |       |        |        |       |   |      |       |       |       |       |   |      |
|--------|-------|--------|--------|-------|---|------|-------|-------|-------|-------|---|------|
| 36.265 | 10.96 | 88.65  | 60.49  | 9.705 | 0 | 2.34 | 30.63 | 13.05 | 18.15 | 4.805 | 0 | 0    |
| 37.89  | 5.965 | 68.51  | 49.435 | 6.54  | 0 | 0    | 35.26 | 8.575 | 16.33 | 3.41  | 0 | 0    |
| 20.805 | 13.1  | 73.195 | 43.115 | 7.37  | 0 | 0    | 27.54 | 3.75  | 5.375 | 0     | 0 | 4.35 |

|       |         |        |         |        |   |       |       |        |        |       |       |       |
|-------|---------|--------|---------|--------|---|-------|-------|--------|--------|-------|-------|-------|
| 50.96 | 101.145 | 202.42 | 192.605 | 38.935 | 0 | 5.235 | 6.67  | 87.575 | 71.12  | 1.705 | 32.9  | 1.715 |
| 43.68 | 91.32   | 153.68 | 91.535  | 26.415 | 0 | 2.34  | 8.195 | 40.975 | 46.33  | 1.705 | 6.36  | 0.615 |
| 46.26 | 56.945  | 132.49 | 73.13   | 22.22  | 0 | 2.34  | 5.1   | 36.625 | 50.045 | 3.41  | 2.575 | 0     |

|        |       |         |        |        |   |      |      |       |        |   |        |      |
|--------|-------|---------|--------|--------|---|------|------|-------|--------|---|--------|------|
| 36.265 | 47.17 | 126.55  | 92.855 | 23.11  | 0 | 2.34 | 4.56 | 35.53 | 27.58  | 0 | 6.53   | 0.7  |
| 50.96  | 98.82 | 231.715 | 120.12 | 31.355 | 0 | 3.48 | 5.63 | 59.47 | 47.815 | 0 | 21.635 | 1.37 |

| pg/mg   |         |        |         |        |        |        |        |        |              |              |        |        |
|---------|---------|--------|---------|--------|--------|--------|--------|--------|--------------|--------------|--------|--------|
| Kidney  | Kidney  | Kidney | Kidney  | Kidney | Kidney | Kidney | Kidney | Kidney | Kidney       | Kidney       | Kidney | Kidney |
| kGM-CSF | kIFN-g  | kIL-1a | kIL-1b  | kIL-2  | kIL-4  | kIL-5  | kIL-6  | kIL-10 | kIL-12 (p40) | kIL-12 (p70) | kIL-13 | kIL-17 |
| 23.605  | 222.935 | 508.36 | 153.175 | 36.065 | 0      | 0      | 8.075  | 38.325 | 61.99        | 4.36         | 251.81 | 2.38   |
| 0       | 0       | 3.465  | 0       | 0      | 0      | 0      | 0.22   | 1.81   | 0            | 0            | 0      | 0      |
| 0       | 0       | 15.425 | 0.91    | 0      | 0      | 0      | 0      | 2.43   | 0            | 0            | 0      | 0      |
| 0       | 0       | 19.37  | 2.205   | 0      | 0      | 0      | 0      | 2.43   | 0            | 0            | 0      | 0      |

| kGM-CSF | kIFN-g  | kIL-1a  | kIL-1b  | kIL-2  | kIL-4 | kIL-5 | kIL-6  | kIL-10 | kIL-12 (p40) | kIL-12 (p70) | kIL-13  | kIL-17 |
|---------|---------|---------|---------|--------|-------|-------|--------|--------|--------------|--------------|---------|--------|
| 41.51   | 247.155 | 437.865 | 244.69  | 57.78  | 0     | 2     | 38.94  | 69.805 | 118.945      | 25.04        | 300.285 | 5.255  |
| 0       | 0       | 8.415   | 2.205   | 0      | 0     | 0     | 10.405 | 1.81   | 0            | 0            | 0       | 0      |
| 17.21   | 30.66   | 106.975 | 37.135  | 20.15  | 0     | 0     | 54.855 | 8.49   | 9.005        | 0            | 0       | 0      |
| 26.36   | 3.82    | 54.48   | 19.6    | 3.635  | 0     | 0     | 18.735 | 3.57   | 4.455        | 0            | 0       | 0      |
| 42.32   | 32.375  | 98.54   | 69.755  | 13.825 | 0     | 0.525 | 4.015  | 18.49  | 25.79        | 0.48         | 0       | 0      |
| 46.26   | 245.235 | 412.8   | 171.225 | 43.615 | 0     | 4.415 | 10.88  | 155.07 | 48.97        | 0            | 68.715  | 3.015  |

|       |         |          |         |         |      |       |        |    |         |   |        |       |
|-------|---------|----------|---------|---------|------|-------|--------|----|---------|---|--------|-------|
| 58.65 | 657.325 | 1916.155 | 449.645 | 106.105 | 1.29 | 1.935 | 56.805 | 90 | 130.815 | 0 | 680.47 | 2.555 |
|-------|---------|----------|---------|---------|------|-------|--------|----|---------|---|--------|-------|

|        |         |         |         |        |      |       |         |        |        |       |         |       |
|--------|---------|---------|---------|--------|------|-------|---------|--------|--------|-------|---------|-------|
| 43.26  | 265.985 | 610.445 | 251.895 | 36.84  | 1.22 | 1.36  | 109.085 | 52.215 | 80.535 | 2.445 | 491.725 | 1.185 |
| 3.015  | 0       | 28.445  | 7.9     | 0.165  | 0    | 0     | 24.92   | 5.515  | 0      | 0     | 0       | 0     |
| 0      | 0       | 13.08   | 4.805   | 0      | 0    | 0     | 3.9     | 2.33   | 0      | 0     | 0       | 0     |
| 5.215  | 0       | 17.425  | 4.325   | 0      | 0    | 0     | 0       | 3.37   | 0      | 0     | 0       | 0     |
| 0      | 0       | 4.495   | 0       | 0      | 0    | 0     | 26.695  | 1.595  | 0      | 0     | 0       | 0     |
| 34.555 | 33.445  | 136.225 | 37.43   | 21.09  | 0    | 0.525 | 33.07   | 20.115 | 17.46  | 0     | 0.07    | 0     |
| 30.785 | 49.535  | 131.725 | 32.82   | 22.98  | 0    | 0     | 1.21    | 12.72  | 4.455  | 0     | 0       | 0     |
| 26.36  | 83.59   | 162.875 | 35.015  | 26.365 | 0    | 0.525 | 31.685  | 10.87  | 9.185  | 0     | 0       | 0     |
| 36.265 | 10.96   | 88.65   | 60.49   | 9.705  | 0    | 2.34  | 30.63   | 13.05  | 18.15  | 4.805 | 0       | 0     |
| 37.89  | 5.965   | 68.51   | 49.435  | 6.54   | 0    | 0     | 35.26   | 8.575  | 16.33  | 3.41  | 0       | 0     |
| 20.805 | 13.1    | 73.195  | 43.115  | 7.37   | 0    | 0     | 27.54   | 3.75   | 5.375  | 0     | 0       | 4.35  |
| 50.96  | 101.145 | 202.42  | 192.605 | 38.935 | 0    | 5.235 | 6.67    | 87.575 | 71.12  | 1.705 | 32.9    | 1.715 |
| 43.68  | 91.32   | 153.68  | 91.535  | 26.415 | 0    | 2.34  | 8.195   | 40.975 | 46.33  | 1.705 | 6.36    | 0.615 |
| 46.26  | 56.945  | 132.49  | 73.13   | 22.22  | 0    | 2.34  | 5.1     | 36.625 | 50.045 | 3.41  | 2.575   | 0     |
| 36.265 | 47.17   | 126.55  | 92.855  | 23.11  | 0    | 2.34  | 4.56    | 35.53  | 27.58  | 0     | 6.53    | 0.7   |
| 50.96  | 98.82   | 231.715 | 120.12  | 31.355 | 0    | 3.48  | 5.63    | 59.47  | 47.815 | 0     | 21.635  | 1.37  |

kidney IP-1 kidney KC kidney MC kidney MIC kidney MIF kidney TNF kidney VEGF

| Kidney | Kidney | Kidney | Kidney | Kidney | Kidney | Kidney |
|--------|--------|--------|--------|--------|--------|--------|
|--------|--------|--------|--------|--------|--------|--------|

kidney IP-1 kidney KC kidney MC kidney MIC kidney MIF kidney TNF kidney VEGF

|          |          |          |          |         |       |        |
|----------|----------|----------|----------|---------|-------|--------|
| 82.88    | 10.825   | 8.965    | 580.025  | 16.735  | 2.145 | 56.365 |
| 135.455  | 543.545  | 121.48   | 524.07   | 31.785  | 2.235 | 96.83  |
| 2317.065 | 4770.065 | 1612.5   | 2943.105 | 147.58  | 2.38  | 98.26  |
| 5000.0   | 5000.0   | 2118.17  | 24877.6  | 249.54  | 4.8   | 77.17  |
| 2129.995 | 2389.965 | 428.535  | 6598.065 | 61.615  | 0.74  | 20.635 |
| 1238.17  | 1386.595 | 283.575  | 8455.09  | 81.025  | 1.055 | 12.535 |
| 211.755  | 152.71   | 137.15   | 583.41   | 13.005  | 0     | 0.425  |
| 48.99    | 7.23     | 9.48     | 420.125  | 10.92   | 2.17  | 62.17  |
| 1058.45  | 4725.385 | 983.05   | 546.375  | 132.83  | 3.47  | 90.315 |
| 2071.84  | 2438.125 | 1069.175 | 3974.785 | 139.9   | 2.365 | 63     |
| 1578.365 | 1779.58  | 1278.03  | 12753.67 | 152.845 | 3.22  | 47.745 |
| 2573.285 | 1113.37  | 328.68   | 8599.65  | 71.11   | 3.2   | 20.855 |
| 165.195  | 20.87    | 54.385   | 2518.32  | 37.105  | 2.925 | 71.13  |
| 164.925  | 26.55    | 52.84    | 913.23   | 23.935  | 0.605 | 19.215 |
| 64.765   | 11.06    | 11.465   | 749.895  | 47.76   | 2.2   | 99.5   |
| 965.065  | 4703.79  | 787.81   | 408.67   | 153.4   | 4.405 | 77.33  |
| 1909.835 | 4974.19  | 1756.275 | 4504.77  | 178.66  | 2.255 | 84.035 |
| 2575.69  | 2264.375 | 901.18   | 5340.695 | 83.095  | 0     | 37.57  |
| 2908.035 | 1947.02  | 406.035  | 8426.85  | 60.13   | 2.49  | 27.92  |
| 441.14   | 197.865  | 93.43    | 10010.66 | 44.82   | 0     | 19.74  |
| 418.845  | 202.84   | 61.135   | 1281.34  | 9.785   | 0     | 4.245  |
| 51.795   | 4.005    | 11.945   | 688.27   | 18.985  | 2.22  | 99.45  |
| 640.94   | 4602.97  | 653.615  | 325.12   | 119.57  | 2.975 | 76.45  |
| 5000.0   | 5000.0   | 1694.16  | 8260.13  | 232.095 | 6.33  | 90.25  |
| 1561.215 | 1958.14  | 1148.02  | 5716.02  | 36.535  | 0     | 37.39  |
| 3159.905 | 1899.49  | 355.275  | 9676.105 | 99.555  | 4.07  | 27.05  |

|                |                |                |                 |              |          |              |
|----------------|----------------|----------------|-----------------|--------------|----------|--------------|
| 197.495        | 135.425        | 130.715        | 1816.77         | 21.325       | 0        | 9.035        |
| 379.67         | 389.11         | 76.195         | 1902.675        | 22.68        | 0        | 0.215        |
| 159.295        | 53.28          | 76.485         | 381.28          | 83.54        | 3.37     | 104.06       |
| 820.625        | 5000.0         | 637.745        | 646.89          | 206.84       | 18.84    | 157.925      |
| 5000.0         | 5000.0         | 2223.385       | 13779.69        | 302.8        | 5.915    | 103.08       |
| 557.2          | 100.25         | 78.33          | 5219.34         | 22.88        | 0        | 80.7         |
| 17540.54       | 3652.96        | 842.825        | 9484.07         | 144.94       | 1.855    | 31.035       |
| 2129.085       | 3247.215       | 460.145        | 5746.87         | 34.01        | 0        | 11.245       |
| 210.86         | 18.935         | 40.495         | 1408.99         | 8.92         | 0        | 49.665       |
| 852.665        | 5000.0         | 957.845        | 374.06          | 182.25       | 12.24    | 150.825      |
| 5000.0         | 5000.0         | 1760.955       | 9110.17         | 240.955      | 5.01     | 107.725      |
| 4245.365       | 2527.375       | 991.29         | 6508.58         | 178.505      | 0        | 91.675       |
| 10087.72       | 3366.615       | 632.93         | 8780.24         | 85.39        | 1.26     | 18.565       |
| <b>2020.48</b> | <b>2452.52</b> | <b>202.525</b> | <b>5828.205</b> | <b>22.88</b> | <b>0</b> | <b>4.185</b> |
| <b>366.75</b>  | <b>112.955</b> | <b>55.87</b>   | <b>2321.31</b>  | <b>32.18</b> | <b>0</b> | <b>3.61</b>  |

| Kidney  | Kidney | Kidney | Kidney  | Kidney  | Kidney | Kidney |
|---------|--------|--------|---------|---------|--------|--------|
| kIP-10  | kKC    | kMCP-1 | kMIG    | kMIP-1a | kTNFa  | kVEGF  |
| 82.88   | 10.825 | 8.965  | 580.025 | 16.735  | 2.145  | 56.365 |
| 48.99   | 7.23   | 9.48   | 420.125 | 10.92   | 2.17   | 62.17  |
| 64.765  | 11.06  | 11.465 | 749.895 | 47.76   | 2.2    | 99.5   |
| 51.795  | 4.005  | 11.945 | 688.27  | 18.985  | 2.22   | 99.45  |
| 159.295 | 53.28  | 76.485 | 381.28  | 83.54   | 3.37   | 104.06 |

|          |          |        |          |         |       |       |
|----------|----------|--------|----------|---------|-------|-------|
| kIP-10   | kKC      | kMCP-1 | kMIG     | kMIP-1a | kTNFa | kVEGF |
| 135.455  | 543.545  | 121.48 | 524.07   | 31.785  | 2.235 | 96.83 |
| 2317.065 | 4770.065 | 1612.5 | 2943.105 | 147.58  | 2.38  | 98.26 |

|          |          |          |          |         |       |         |
|----------|----------|----------|----------|---------|-------|---------|
| 5000.0   | 5000.0   | 2118.17  | 24877.6  | 249.54  | 4.8   | 77.17   |
| 2129.995 | 2389.965 | 428.535  | 6598.065 | 61.615  | 0.74  | 20.635  |
| 1238.17  | 1386.595 | 283.575  | 8455.09  | 81.025  | 1.055 | 12.535  |
| 211.755  | 152.71   | 137.15   | 583.41   | 13.005  | 0     | 0.425   |
| 1058.45  | 4725.385 | 983.05   | 546.375  | 132.83  | 3.47  | 90.315  |
| 2071.84  | 2438.125 | 1069.175 | 3974.785 | 139.9   | 2.365 | 63      |
| 1578.365 | 1779.58  | 1278.03  | 12753.67 | 152.845 | 3.22  | 47.745  |
| 2573.285 | 1113.37  | 328.68   | 8599.65  | 71.11   | 3.2   | 20.855  |
| 165.195  | 20.87    | 54.385   | 2518.32  | 37.105  | 2.925 | 71.13   |
| 164.925  | 26.55    | 52.84    | 913.23   | 23.935  | 0.605 | 19.215  |
| 965.065  | 4703.79  | 787.81   | 408.67   | 153.4   | 4.405 | 77.33   |
| 1909.835 | 4974.19  | 1756.275 | 4504.77  | 178.66  | 2.255 | 84.035  |
| 2575.69  | 2264.375 | 901.18   | 5340.695 | 83.095  | 0     | 37.57   |
| 2908.035 | 1947.02  | 406.035  | 8426.85  | 60.13   | 2.49  | 27.92   |
| 441.14   | 197.865  | 93.43    | 10010.66 | 44.82   | 0     | 19.74   |
| 418.845  | 202.84   | 61.135   | 1281.34  | 9.785   | 0     | 4.245   |
| 640.94   | 4602.97  | 653.615  | 325.12   | 119.57  | 2.975 | 76.45   |
| 5000.0   | 5000.0   | 1694.16  | 8260.13  | 232.095 | 6.33  | 90.25   |
| 1561.215 | 1958.14  | 1148.02  | 5716.02  | 36.535  | 0     | 37.39   |
| 3159.905 | 1899.49  | 355.275  | 9676.105 | 99.555  | 4.07  | 27.05   |
| 197.495  | 135.425  | 130.715  | 1816.77  | 21.325  | 0     | 9.035   |
| 379.67   | 389.11   | 76.195   | 1902.675 | 22.68   | 0     | 0.215   |
| 820.625  | 5000.0   | 637.745  | 646.89   | 206.84  | 18.84 | 157.925 |
| 5000.0   | 5000.0   | 2223.385 | 13779.69 | 302.8   | 5.915 | 103.08  |
| 557.2    | 100.25   | 78.33    | 5219.34  | 22.88   | 0     | 80.7    |
| 17540.54 | 3652.96  | 842.825  | 9484.07  | 144.94  | 1.855 | 31.035  |
| 2129.085 | 3247.215 | 460.145  | 5746.87  | 34.01   | 0     | 11.245  |
| 210.86   | 18.935   | 40.495   | 1408.99  | 8.92    | 0     | 49.665  |
| 852.665  | 5000.0   | 957.845  | 374.06   | 182.25  | 12.24 | 150.825 |

|                |                |                |                 |              |          |              |
|----------------|----------------|----------------|-----------------|--------------|----------|--------------|
| 5000.0         | 5000.0         | 1760.955       | 9110.17         | 240.955      | 5.01     | 107.725      |
| 4245.365       | 2527.375       | 991.29         | 6508.58         | 178.505      | 0        | 91.675       |
| 10087.72       | 3366.615       | 632.93         | 8780.24         | 85.39        | 1.26     | 18.565       |
| <b>2020.48</b> | <b>2452.52</b> | <b>202.525</b> | <b>5828.205</b> | <b>22.88</b> | <b>0</b> | <b>4.185</b> |
| <b>366.75</b>  | <b>112.955</b> | <b>55.87</b>   | <b>2321.31</b>  | <b>32.18</b> | <b>0</b> | <b>3.61</b>  |

kidney IP-1 kidney KC kidney MC kidney MIC kidney MIF kidney TNF kidney VEGF  
 Kidney Kidney Kidney Kidney Kidney Kidney Kidney

kidney IP-1 kidney KC kidney MC kidney MIC kidney MIF kidney TNF kidney VEGF

|         |          |         |          |        |       |        |
|---------|----------|---------|----------|--------|-------|--------|
| 369.83  | 42.47    | 27.265  | 1609.335 | 42.83  | 1.05  | 85.995 |
| 533.31  | 1242.425 | 143.09  | 1355.285 | 106.13 | 5.125 | 128.02 |
| 491.83  | 444.365  | 269.635 | 1996.69  | 20.755 | 0     | 132.86 |
| 583.12  | 213.485  | 210.935 | 473.31   | 25.9   | 3.875 | 32.295 |
| 547.345 | 79.21    | 301.295 | 2483.195 | 27.27  | 2.35  | 103.93 |
| 90.15   | 41.305   | 45.17   | 1228.06  | 37.94  | 3.29  | 62.25  |
| 66.81   | 98.34    | 45.17   | 424.78   | 45.86  | 4.27  | 90.46  |

|       |        |      |         |   |      |         |
|-------|--------|------|---------|---|------|---------|
| 79.08 | 14.985 | 4.39 | 709.665 | 0 | 0    | 150.865 |
| 64.16 | 5.36   | 0    | 966.385 | 0 | 0    | 104.52  |
| 51.97 | 3.655  | 3.14 | 435.23  | 0 | 0.07 | 139.045 |

|         |          |         |         |        |       |         |
|---------|----------|---------|---------|--------|-------|---------|
| 480.54  | 1350.95  | 509.82  | 653.86  | 85.985 | 4.94  | 122.13  |
| 426.695 | 1502.3   | 557.08  | 518.355 | 60.985 | 3.515 | 85.42   |
| 499.16  | 2148.545 | 687.235 | 1026    | 10.23  | 0.445 | 148.025 |

|         |         |         |          |       |     |         |
|---------|---------|---------|----------|-------|-----|---------|
| 441.985 | 156.545 | 221.775 | 1738.935 | 18.67 | 0   | 104.745 |
| 141.135 | 22.56   | 42.045  | 499.425  | 0     | 0.1 | 198.505 |
| 482.645 | 746.175 | 346.995 | 1323.205 | 0     | 0   | 119.085 |

|          |        |        |        |        |       |       |
|----------|--------|--------|--------|--------|-------|-------|
| 1010.395 | 170.11 | 236.85 | 598.85 | 29.875 | 3.105 | 38.66 |
| 25.125   | 29.69  | 32.29  | 90.065 | 25.9   | 1.735 | 48.69 |

|         |         |        |         |      |      |        |
|---------|---------|--------|---------|------|------|--------|
| 642.105 | 148.375 | 163.97 | 638.435 | 25.9 | 2.35 | 47.465 |
|---------|---------|--------|---------|------|------|--------|

|         |         |         |          |        |       |        |
|---------|---------|---------|----------|--------|-------|--------|
| 388.92  | 73.05   | 189.11  | 3266.135 | 42.035 | 2.58  | 47.09  |
| 899.455 | 116.585 | 392.7   | 3434.875 | 40.025 | 3.945 | 95.25  |
| 321.01  | 101.76  | 236.055 | 2472.155 | 25.9   | 0.325 | 76.205 |

|         |         |        |          |        |       |        |
|---------|---------|--------|----------|--------|-------|--------|
| 69.66   | 100.255 | 51.3   | 370.945  | 56.17  | 4.95  | 29.16  |
| 112.855 | 68.535  | 54.665 | 1532.455 | 43.975 | 3.835 | 71.22  |
| 100.48  | 57.785  | 39.615 | 1083.75  | 37.94  | 3.29  | 65.705 |

|       |        |        |        |        |       |         |
|-------|--------|--------|--------|--------|-------|---------|
| 74.56 | 58.985 | 45.17  | 428.8  | 38.99  | 2.35  | 117.515 |
| 50.85 | 71.355 | 48.935 | 250.26 | 42.035 | 2.655 | 135.135 |

| Kidney |        |        |          |         |        |         |
|--------|--------|--------|----------|---------|--------|---------|
| Kidney | Kidney | Kidney | Kidney   | Kidney  | Kidney | Kidney  |
| kIP-10 | kKC    | kMCP-1 | kMIG     | kMIP-1a | kTNFa  | kVEGF   |
| 369.83 | 42.47  | 27.265 | 1609.335 | 42.83   | 1.05   | 85.995  |
| 79.08  | 14.985 | 4.39   | 709.665  | 0       | 0      | 150.865 |
| 64.16  | 5.36   | 0      | 966.385  | 0       | 0      | 104.52  |
| 51.97  | 3.655  | 3.14   | 435.23   | 0       | 0.07   | 139.045 |

| kIP-10  | kKC      | kMCP-1  | kMIG     | kMIP-1a | kTNFa | kVEGF  |
|---------|----------|---------|----------|---------|-------|--------|
| 533.31  | 1242.425 | 143.09  | 1355.285 | 106.13  | 5.125 | 128.02 |
| 491.83  | 444.365  | 269.635 | 1996.69  | 20.755  | 0     | 132.86 |
| 583.12  | 213.485  | 210.935 | 473.31   | 25.9    | 3.875 | 32.295 |
| 547.345 | 79.21    | 301.295 | 2483.195 | 27.27   | 2.35  | 103.93 |
| 90.15   | 41.305   | 45.17   | 1228.06  | 37.94   | 3.29  | 62.25  |
| 66.81   | 98.34    | 45.17   | 424.78   | 45.86   | 4.27  | 90.46  |

|        |         |        |        |        |      |        |
|--------|---------|--------|--------|--------|------|--------|
| 480.54 | 1350.95 | 509.82 | 653.86 | 85.985 | 4.94 | 122.13 |
|--------|---------|--------|--------|--------|------|--------|

|         |          |         |         |        |       |         |
|---------|----------|---------|---------|--------|-------|---------|
| 426.695 | 1502.3   | 557.08  | 518.355 | 60.985 | 3.515 | 85.42   |
| 499.16  | 2148.545 | 687.235 | 1026    | 10.23  | 0.445 | 148.025 |

|         |         |         |          |       |     |         |
|---------|---------|---------|----------|-------|-----|---------|
| 441.985 | 156.545 | 221.775 | 1738.935 | 18.67 | 0   | 104.745 |
| 141.135 | 22.56   | 42.045  | 499.425  | 0     | 0.1 | 198.505 |
| 482.645 | 746.175 | 346.995 | 1323.205 | 0     | 0   | 119.085 |

|          |         |        |         |        |       |        |
|----------|---------|--------|---------|--------|-------|--------|
| 1010.395 | 170.11  | 236.85 | 598.85  | 29.875 | 3.105 | 38.66  |
| 25.125   | 29.69   | 32.29  | 90.065  | 25.9   | 1.735 | 48.69  |
| 642.105  | 148.375 | 163.97 | 638.435 | 25.9   | 2.35  | 47.465 |

|         |         |         |          |        |       |        |
|---------|---------|---------|----------|--------|-------|--------|
| 388.92  | 73.05   | 189.11  | 3266.135 | 42.035 | 2.58  | 47.09  |
| 899.455 | 116.585 | 392.7   | 3434.875 | 40.025 | 3.945 | 95.25  |
| 321.01  | 101.76  | 236.055 | 2472.155 | 25.9   | 0.325 | 76.205 |

|         |         |        |          |        |       |        |
|---------|---------|--------|----------|--------|-------|--------|
| 69.66   | 100.255 | 51.3   | 370.945  | 56.17  | 4.95  | 29.16  |
| 112.855 | 68.535  | 54.665 | 1532.455 | 43.975 | 3.835 | 71.22  |
| 100.48  | 57.785  | 39.615 | 1083.75  | 37.94  | 3.29  | 65.705 |

|       |        |        |        |        |       |         |
|-------|--------|--------|--------|--------|-------|---------|
| 74.56 | 58.985 | 45.17  | 428.8  | 38.99  | 2.35  | 117.515 |
| 50.85 | 71.355 | 48.935 | 250.26 | 42.035 | 2.655 | 135.135 |
